# Supplementary material for: Olefination of aldehydes with alpha-halo redox-active esters
Source: Royal Society of Chemistry journal article supplement (doi:10.1039/d3qo01805a), 2023-12-14
Supplement: d3qo01805a1.pdf [file d3qo01805a1.pdf]

## *Supporting Information*

# **Olefination of aldehydes with alpha-halo redox-active esters**

Zhengqiang Liu and Wenbo H. Liu\*

School of Chemistry, Sun Yat-sen University, Guangzhou 510275, China

E-mail: liuwb29@mail.sysu.edu.cn

## **Table of Contents**

|                                                                              |     |
|------------------------------------------------------------------------------|-----|
| <b>1. General Information</b> .....                                          | S2  |
| <b>2. Experimental procedures</b> .....                                      | S2  |
| <b>3. Scaled-up reaction</b> .....                                           | S46 |
| <b>4. Mechanistic studies</b> .....                                          | S47 |
| 4.1 The detection of phthalimide and CO <sub>2</sub> .....                   | S47 |
| 4.2 Control reaction to rule out the potential carbenoid intermediate .....  | S48 |
| 4.3 Control experiment with 4-bromobut-2-enoic acid-derived NHPI ester ..... | S48 |
| 4.4 Relation between the stereochemistry .....                               | S49 |
| 4.5 Control reactions for the nucleophilic addition step .....               | S50 |
| 4.6 Control reactions for the elimination step .....                         | S52 |
| 4.7 Solvent effect on the E/Z selectivity .....                              | S54 |
| 4.8 Cyclic Voltammetry experiments .....                                     | S55 |
| 4.9 Analysis of UV-Vis absorption spectra .....                              | S57 |
| <b>5. References</b> .....                                                   | S59 |
| <b>6. Copies of NMR spectra</b> .....                                        | S62 |

## 1. General Information

Commercial reagents were purchased from Energy, TCI, J&K, Accela, Macklin or Adamas and used without further purification. The anhydrous solvents used in the experiments were all purchased and used directly. All reactions were carried out with the oven-dried glassware or Schlenk tube. Analytical thin layer chromatography (TLC) was performed on 0.20 mm silica gel HSGF-254 plates (Huanghai, China). Column chromatography was performed on 200-300 mesh silica gel or 300-400 mesh silica gel (General-Reagent, China). Aldehydes of **2a-2v** were commercially available. Aldehydes of **2w-2aa** were synthesized according to reported methods.<sup>1</sup> All NHPI esters were synthesized according to reported methods.<sup>2</sup>

<sup>1</sup>H NMR (400 MHz or 600 MHz) and <sup>13</sup>C NMR (101 MHz or 151 MHz) were recorded on an NMR spectrometer with CDCl<sub>3</sub> as the solvent. Chemical shifts of <sup>1</sup>H and <sup>13</sup>C NMR spectra are reported in parts per million (ppm). The residual solvent signals were used as references and the chemical shifts were converted to the TMS scale (CDCl<sub>3</sub>:  $\delta$  H = 7.26 ppm,  $\delta$  C = 77.16 ppm). All coupling constants (*J* values) were reported in Hertz (Hz). High resolution mass spectrometry data of new compounds were recorded on an LTQ Orbitrap Elite LC/MS (ESI or APCI). GC-MS data were collected by an Agilent 5977B instrument. Cyclic Voltammetry measurements were carried out with a CHI600E apparatus. UV-vis spectra were collected by a Shimadzu UV-2600 ultra-violet and visible spectrophotometer. The room temperature ranges from 20 °C to 34 °C.

## 2. Experimental procedures

### 4-(pent-1-en-1-yl)-1,1'-biphenyl (**3a**)

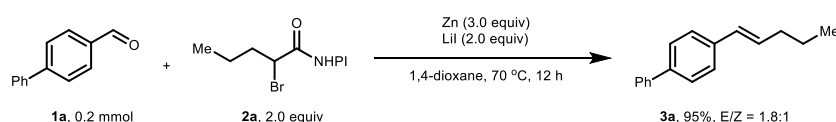

Under the argon atmosphere, 4-biphenylcarboxaldehyde **1a** (0.2 mmol, 36.4 mg, 1.0 equiv), 1,3-dioxoisindolin-2-yl 2-bromopentanoate **2a** (0.4 mmol, 131.0 mg, 2.0 equiv), Zn power (0.6 mmol, 39.2 mg, 3.0 equiv) and LiI (0.4 mmol, 54.0 mg, 2.0 equiv) were added to a 10 mL Schlenk tube with a magnetic bar. Anhydrous 1,4-dioxane (1.0

mL) was charged and the solution was stirred at 70 °C for 12 h. The reaction mixture was concentrated under reduced pressure. The residual was purified by column chromatography on silica gel (eluent: petroleum ether/ethyl acetate = 100:1) to afford **3a** as a white solid.

**R<sub>f</sub>** = 0.8 (eluent: petroleum ether/EtOAc = 50:1).

**Yield** 42.2 mg (95%).

**NMR spectroscopy:**

(*E*): <sup>1</sup>H NMR (600 MHz, CDCl<sub>3</sub>) δ 7.62-7.55 (m, 3H), 7.53 (d, *J* = 7.8 Hz, 1H), 7.44-7.39 (m, 3H), 7.37-7.30 (m, 2H), 6.46-6.38 (m, 1H), 6.30-6.23 (m, 1H), 2.23-2.17 (m, 2H), 1.53-1.48 (m, 2H), 0.96 (t, *J* = 7.2 Hz, 3H).

(*Z*): <sup>1</sup>H NMR (600 MHz, CDCl<sub>3</sub>) δ 7.62-7.55 (m, 3H), 7.53 (d, *J* = 7.8 Hz, 1H), 7.44-7.39 (m, 3H), 7.37-7.30 (m, 2H), 6.46-6.38 (m, 1H), 5.72-5.66 (m, 1H), 2.38-2.33 (m, 2H), 1.53-1.48 (m, 2H), 0.95 (t, *J* = 7.2 Hz, 3H).

(*E*): <sup>13</sup>C NMR (151 MHz, CDCl<sub>3</sub>) δ 140.93, 139.56, 137.06, 131.21, 129.22, 128.77, 128.75, 127.19, 126.90, 126.34, 35.20, 22.58, 13.74.

(*Z*): <sup>13</sup>C NMR (151 MHz, CDCl<sub>3</sub>) δ 140.92, 139.22, 136.93, 133.32, 129.49, 128.77, 128.45, 127.13, 126.99, 126.82, 30.87, 23.19, 13.87.

Spectroscopic data are in accordance with that reported in the literature.<sup>3</sup>

**9-(pent-1-en-1-yl)anthracene (3b)**

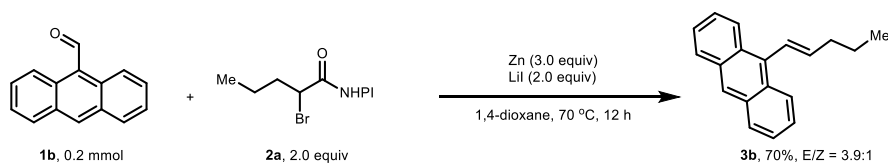

Under the argon atmosphere, anthracene-9-carbaldehyde **1b** (0.2 mmol, 41.2 mg, 1.0 equiv), 1,3-dioxoisindolin-2-yl 2-bromopentanoate **2a** (0.4 mmol, 131.0 mg, 2.0 equiv), Zn power (0.6 mmol, 39.2 mg, 3.0 equiv) and LiI (0.4 mmol, 54.0 mg, 2.0 equiv) were added to a 10 mL Schlenk tube with a magnetic bar. Anhydrous 1,4-dioxane (1.0 mL) was charged and the solution was stirred at 70 °C for 12 h. The reaction mixture was concentrated under reduced pressure. The residual was purified by column chromatography on silica gel (eluent: petroleum ether/ethyl acetate = 100:1) to afford

**3b** yield as a yellow solid.

**R<sub>f</sub>** = 0.8 (eluent: petroleum ether/EtOAc = 50:1).

**Yield** 34.5 mg (70%).

**NMR spectroscopy:**

(*E*): <sup>1</sup>H NMR (400 MHz, CDCl<sub>3</sub>) δ 8.33 (s, 1H), 8.32-8.27 (m, 2H), 8.00-7.90 (m, 2H), 7.47-7.37 (m, 4H), 7.10 (d, *J* = 16.4 Hz, 1H), 6.06-5.94 (m, 1H), 2.50-2.41 (qd, *J* = 7.2, 1.6 Hz, 2H), 1.78-1.62 (m, 2H), 1.10 (t, *J* = 7.2 Hz, 3H).

(*Z*): <sup>1</sup>H NMR (400 MHz, CDCl<sub>3</sub>) δ 8.37 (s, 1H), 8.19-8.14 (m, 2H), 8.00-7.90 (m, 2H), 7.47-7.37 (m, 4H), 6.97 (d, *J* = 11.2 Hz, 1H), 6.28-6.20 (m, 1H), 2.50-2.41 (qd, *J* = 7.2 Hz, 1.6 Hz, 2H), 1.78-1.62 (m, 2H), 0.71 (t, *J* = 7.2 Hz, 3H).

(*E*): <sup>13</sup>C NMR (101 MHz, CDCl<sub>3</sub>) δ 139.42, 136.56, 133.73, 131.54, 129.65, 128.57, 126.49, 126.25, 125.78, 125.54, 125.08, 125.03, 35.80, 22.68, 13.96.

(*Z*): <sup>13</sup>C NMR (101 MHz, CDCl<sub>3</sub>) δ 139.42, 136.56, 133.73, 131.41, 129.48, 128.57, 126.49, 126.25, 125.92, 125.35, 125.13, 125.03, 31.22, 22.21, 13.77.

**HRMS** (APCI) calcd for (C<sub>19</sub>H<sub>19</sub>)<sup>+</sup> [*M* + *H*]<sup>+</sup>: 247.1481, found: 247.1479.

### 9-(pent-1-en-1-yl)phenanthrene (**3c**)

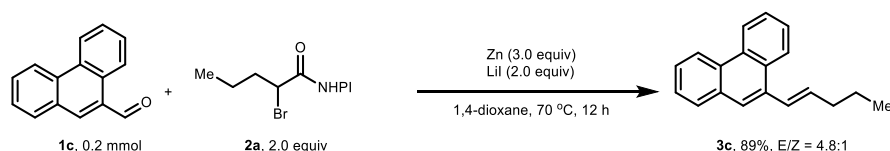

Under the argon atmosphere, phenanthrene-9-carbaldehyde **1c** (0.2 mmol, 41.2 mg, 1.0 equiv), 1,3-dioxoisindolin-2-yl 2-bromopentanoate **2a** (0.4 mmol, 131.0 mg, 2.0 equiv), Zn power (0.6 mmol, 39.2 mg, 3.0 equiv) and LiI (0.4 mmol, 54.0 mg, 2.0 equiv) were added to a 10 mL Schlenk tube with a magnetic bar. Anhydrous 1,4-dioxane (1.0 mL) was charged and the solution was stirred at 70 °C for 12 h. The reaction mixture was concentrated under reduced pressure. The residual was purified by column chromatography on silica gel (eluent: petroleum ether/ethyl acetate = 100:1) to afford **3c** as a white solid.

**R<sub>f</sub>** = 0.7 (eluent: petroleum ether/EtOAc = 50:1).

**Yield** 43.5 mg (89%).

**NMR spectroscopy:**



(*E*):  $^1\text{H}$  NMR (400 MHz,  $\text{CDCl}_3$ )  $\delta$  8.73 (d,  $J$  = 7.2 Hz, 1H), 8.66 (d,  $J$  = 7.6 Hz, 1H), 8.22-8.16 (m, 1H), 7.90-7.84 (m, 1H), 7.79 (s, 1H), 7.70-7.55 (m, 4H), 7.12 (d,  $J$  = 15.6 Hz, 1H), 6.37-6.26 (m, 1H), 2.41-2.31 (m, 2H), 1.70-1.58 (m, 2H), 1.09-1.01 (m, 3H).  
 (*Z*):  $^1\text{H}$  NMR (400 MHz,  $\text{CDCl}_3$ )  $\delta$  8.73 (d,  $J$  = 7.2 Hz, 1H), 8.66 (d,  $J$  = 7.6 Hz, 1H), 8.12-8.07 (m, 1H), 7.90-7.84 (m, 1H), 7.79 (s, 1H), 7.70-7.55 (m, 4H), 6.90 (d,  $J$  = 11.6 Hz, 1H), 6.05-5.96 (m, 1H), 2.25-2.17 (m, 2H), 1.49-1.40 (m, 2H), 1.09-1.01 (m, 3H).  
 (*E*):  $^{13}\text{C}$  NMR (151 MHz,  $\text{CDCl}_3$ )  $\delta$  134.74, 134.64, 130.88, 130.38, 129.98, 128.46, 127.67, 126.66, 126.48, 126.33, 126.14, 124.83, 124.29, 123.02, 122.49, 35.49, 22.61, 13.82.  
 (*Z*):  $^{13}\text{C}$  NMR (151 MHz,  $\text{CDCl}_3$ )  $\delta$  134.78, 133.45, 131.68, 131.44, 129.90, 128.49, 127.27, 126.87, 126.64, 126.46, 126.37, 125.81, 124.83, 124.29, 122.88, 122.52, 30.76, 22.99, 13.82.

Spectroscopic data are in accordance with that reported in the literature.<sup>4</sup>

### 1-(pent-1-en-1-yl)pyrene (**3d**)

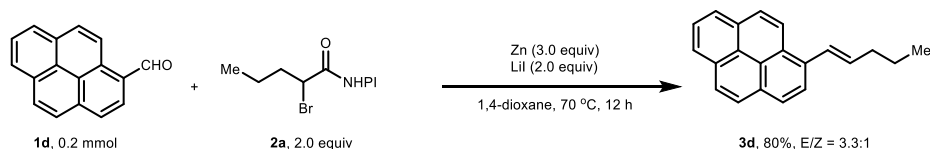

Under the argon atmosphere, pyrene-1-carbaldehyde **1d** (0.2 mmol, 46.0 mg, 1.0 equiv), 1,3-dioxoisindolin-2-yl 2-bromopentanoate **2a** (0.4 mmol, 131.0 mg, 2.0 equiv), Zn power (0.6 mmol, 39.2 mg, 3.0 equiv) and LiI (0.4 mmol, 54.0 mg, 2.0 equiv) were added to a 10 mL Schlenk tube with a magnetic bar. Anhydrous 1,4-dioxane (1.0 mL) was charged and the solution was stirred at 70  $^\circ\text{C}$  for 12 h. The reaction mixture was concentrated under reduced pressure. The residual was purified by column chromatography on silica gel (eluent: petroleum ether/ethyl acetate = 100:1) to afford **3d** as a yellow solid.

**R<sub>f</sub>** = 0.8 (eluent: petroleum ether/EtOAc = 50:1).

**Yield** 43.3 mg (80%).

#### NMR spectroscopy:

(*E*):  $^1\text{H}$  NMR (400 MHz,  $\text{CDCl}_3$ )  $\delta$  8.41 (d,  $J$  = 9.2 Hz, 1H), 8.20-8.11 (m, 4H), 8.11 -

8.02 (m, 3H), 8.02-7.89 (m, 1H), 7.44 (d,  $J = 15.6$  Hz, 1H), 6.51-6.41 (m, 1H), 2.42 (q,  $J = 6.8$  Hz, 2H), 1.72-1.61 (m, 2H), 1.08 (td,  $J = 7.2$  Hz, 2.0 Hz, 3H).

(*Z*):  $^1\text{H}$  NMR (400 MHz,  $\text{CDCl}_3$ )  $\delta$  8.26 (d,  $J = 9.2$  Hz, 1H), 8.20-8.11 (m, 4H), 8.11 - 8.02 (m, 3H), 8.02-7.89 (m, 1H), 7.18 (d,  $J = 11.6$  Hz, 1H), 6.11-6.02 (m, 1H), 2.21 (q,  $J = 7.2$  Hz, 2H), 1.51-1.44 (m, 2H), 0.88 (td,  $J = 7.6$  Hz, 2.4 Hz, 3H).

(*E*):  $^{13}\text{C}$  NMR (101 MHz,  $\text{CDCl}_3$ )  $\delta$  134.77, 131.58, 131.04, 130.33, 127.77, 127.49, 127.22, 127.21, 127.18, 127.13, 126.85, 125.86, 125.04, 125.01, 124.99, 124.77, 123.97, 123.36, 35.84, 22.72, 13.88.

(*Z*):  $^{13}\text{C}$  NMR (101 MHz,  $\text{CDCl}_3$ )  $\delta$  134.89, 131.42, 130.25, 128.87, 127.77, 127.54, 127.48, 127.18, 127.13, 127.02, 125.06, 125.01, 124.99, 124.91, 124.72, 124.35, 30.85, 22.90, 13.81.

HRMS (APCI) calcd for  $(\text{C}_{21}\text{H}_{19})^+ [\text{M} + \text{H}]^+$ : 271.1481, found: 271.1479.

### Ferrocene pent-1-ene (**3e**)

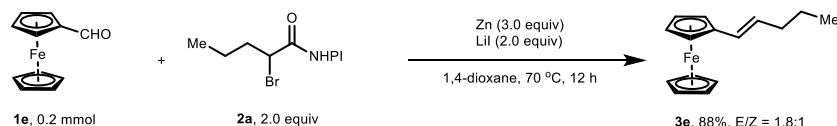

Under the argon atmosphere, ferrocenecarboxaldehyde **1e** (0.2 mmol, 43.0 mg, 1.0 equiv), 1,3-dioxoisindolin-2-yl 2-bromopentanoate **2a** (0.4 mmol, 131.0 mg, 2.0 equiv), Zn power (0.6 mmol, 39.2 mg, 3.0 equiv) and LiI (0.4 mmol, 54.0 mg, 2.0 equiv) were added to a 10 mL Schlenk tube with a magnetic bar. Anhydrous 1,4-dioxane (1.0 mL) was charged and the solution was stirred at 70 °C for 12 h. The reaction mixture was concentrated under reduced pressure. The residual was purified by column chromatography on silica gel (eluent: petroleum ether) to afford **3e** as a brown liquid.

$R_f = 0.9$  (eluent: petroleum ether).

Yield 44.7 mg (88%).

### NMR spectroscopy:

(*E*):  $^1\text{H}$  NMR (400 MHz,  $\text{CDCl}_3$ )  $\delta$  6.10-6.01 (m, 1H), 5.83-5.73 (m, 1H), 4.30 (dt,  $J = 11.2$  Hz, 2.0 Hz, 2H), 4.16 (dt,  $J = 13.6$  Hz, 1.6 Hz, 2H), 4.09 (d,  $J = 4.0$  Hz, 5H), 2.05 (qd,  $J = 7.2$  Hz, 1.6 Hz, 2H), 1.49-1.38 (m, 2H), 0.94 (t,  $J = 7.2$  Hz, 3H).

(*Z*):  $^1\text{H}$  NMR (400 MHz,  $\text{CDCl}_3$ )  $\delta$  6.10-6.01 (m, 1H), 5.49-5.41 (m, 1H), 4.30 (dt,  $J = 11.2$  Hz, 2.0 Hz, 2H), 4.16 (dt,  $J = 13.6$  Hz, 1.6 Hz, 2H), 4.09 (d,  $J = 4.0$  Hz, 5H), 2.23

(qd,  $J = 7.2$  Hz, 1.6 Hz, 2H), 1.49-1.38 (m, 2H), 0.97 (t,  $J = 7.2$  Hz, 3H).

(*E*):  $^{13}\text{C}$  NMR (101 MHz,  $\text{CDCl}_3$ )  $\delta$  128.30, 126.69, 84.42, 69.06, 68.14, 66.30, 35.11, 22.61, 13.66.

(*Z*):  $^{13}\text{C}$  NMR (101 MHz,  $\text{CDCl}_3$ )  $\delta$  129.76, 125.82, 82.45, 69.09, 68.27, 66.30, 31.11, 22.94, 13.97.

HRMS (APCI) calcd for  $(\text{C}_{15}\text{H}_{19}\text{Fe})^+ [\text{M} + \text{H}]^+$ : 255.0831, found: 255.0829.

### 3-(pent-1-en-1-yl)benzofuran (**3f**)

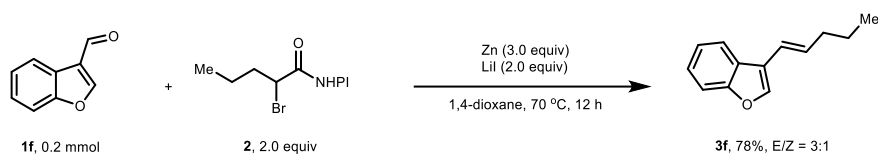

Under the argon atmosphere, benzofuran-3-carbaldehyde **1f** (0.2 mmol, 29.2 mg, 1.0 equiv), 1,3-dioxoisindolin-2-yl 2-bromopentanoate **2a** (0.4 mmol, 131.0 mg, 2.0 equiv), Zn power (0.6 mmol, 39.2 mg, 3.0 equiv) and LiI (0.4 mmol, 54.0 mg, 2.0 equiv) were added to a 10 mL Schlenk tube with a magnetic bar. Anhydrous 1,4-dioxane (1.0 mL) was charged and the solution was stirred at 70 °C for 12 h. The reaction mixture was concentrated under reduced pressure. The residual was purified by column chromatography on silica gel (eluent: petroleum ether/ethyl acetate = 100:1) to afford **3f** as a colorless liquid.

$R_f = 0.7$  (eluent: petroleum ether/EtOAc = 50:1).

Yield 29.0 mg (78%).

#### NMR spectroscopy:

(*E*):  $^1\text{H}$  NMR (400 MHz,  $\text{CDCl}_3$ )  $\delta$  7.79 (d,  $J = 7.6$  Hz, 1H), 7.58 (s, 1H), 7.50-7.44 (m, 1H), 7.33-7.22 (m, 2H), 6.47-6.37 (m, 1H), 6.36-6.26 (m, 1H), 2.30-2.17 (m, 2H), 1.56-1.47 (m, 2H), 0.98 (t,  $J = 7.6$  Hz, 3H).

(*Z*):  $^1\text{H}$  NMR (400 MHz,  $\text{CDCl}_3$ )  $\delta$  7.79 (d,  $J = 7.6$  Hz, 1H), 7.62 (s, 1H), 7.50-7.44 (m, 1H), 7.33-7.22 (m, 2H), 6.47-6.37 (m, 1H), 5.88-5.79 (m, 1H), 2.30-2.17 (m, 2H), 1.56-1.47 (m, 2H), 0.97 (t,  $J = 7.6$  Hz, 3H).

(*E*):  $^{13}\text{C}$  NMR (101 MHz,  $\text{CDCl}_3$ )  $\delta$  155.78, 142.12, 132.19, 124.41, 122.72, 120.80, 119.68, 119.24, 116.61, 111.59, 35.62, 22.71, 13.73.

(Z):  $^{13}\text{C}$  NMR (101 MHz,  $\text{CDCl}_3$ )  $\delta$  154.73, 142.02, 134.41, 126.25, 122.57, 120.80, 119.52, 119.24, 116.61, 111.35, 31.97, 22.62, 13.89.

HRMS (APCI) calcd for  $(\text{C}_{13}\text{H}_{15}\text{O})^+ [\text{M} + \text{H}]^+$ : 187.1117, found: 187.1116.

### 3-(pent-1-en-1-yl)benzo[b]thiophene (3g)

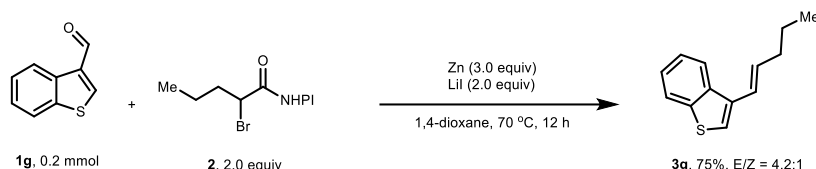

Under the argon atmosphere, benzo[b]thiophene-3-carbaldehyde **1g** (0.2 mmol, 32.4 mg, 1.0 equiv), 1,3-dioxoisindolin-2-yl 2-bromopentanoate **2a** (0.4 mmol, 131.0 mg, 2.0 equiv), Zn power (0.6 mmol, 39.2 mg, 3.0 equiv) and LiI (0.4 mmol, 54.0 mg, 2.0 equiv) were added to a 10 mL Schlenk tube with a magnetic bar. Anhydrous 1,4-dioxane (1.0 mL) was charged and the solution was stirred at 70 °C for 12 h. The reaction mixture was concentrated under reduced pressure. The residual was purified by column chromatography on silica gel (eluent: petroleum ether/ethyl acetate = 100:1) to afford **3g** as a colorless liquid.

R<sub>f</sub> = 0.7 (eluent: petroleum ether/EtOAc = 50:1).

Yield 30.5 mg (75%).

#### NMR spectroscopy:

(E):  $^1\text{H}$  NMR (400 MHz,  $\text{CDCl}_3$ )  $\delta$  7.88 (d,  $J$  = 8.0 Hz, 1H), 7.84 (d,  $J$  = 7.6 Hz, 1H), 7.42-7.30 (m, 3H), 6.64 (d,  $J$  = 16.0 Hz, 1H), 6.32-6.22 (m, 1H), 2.46 (q,  $J$  = 7.6 Hz, 2H), 1.59-1.45 (m, 2H), 0.99 (t,  $J$  = 7.2 Hz, 3H).

(Z):  $^1\text{H}$  NMR (400 MHz,  $\text{CDCl}_3$ )  $\delta$  7.86 (d,  $J$  = 8.0 Hz, 1H), 7.76 (d,  $J$  = 7.6 Hz, 1H), 7.37-7.23 (m, 3H), 6.57 (d,  $J$  = 11.6 Hz, 1H), 5.91-5.82 (m, 1H), 2.31 (q,  $J$  = 7.2 Hz, 2H), 1.59-1.45 (m, 2H), 0.94 (t,  $J$  = 8.0 Hz, 3H).

(E):  $^{13}\text{C}$  NMR (151 MHz,  $\text{CDCl}_3$ )  $\delta$  140.48, 137.92, 134.65, 133.03, 124.29, 124.06, 122.85, 122.23, 122.02, 120.47, 35.44, 22.58, 13.75.

(Z):  $^{13}\text{C}$  NMR (151 MHz,  $\text{CDCl}_3$ )  $\delta$  139.64, 139.12, 134.94, 132.86, 124.33, 124.04, 123.01, 122.63, 122.11, 120.87, 31.44, 22.97, 13.86.

HRMS (APCI) calcd for  $(\text{C}_{13}\text{H}_{15}\text{S})^+ [\text{M} + \text{H}]^+$ : 203.0889, found: 203.0891.

#### 4-(pent-1-en-1-yl)-1H-indole (3h)

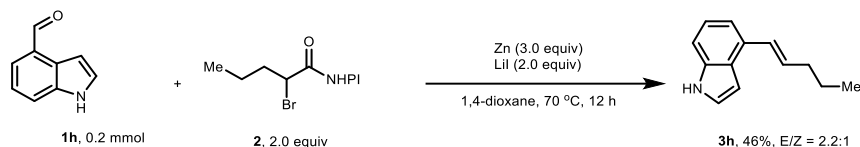

Under the argon atmosphere, 1*H*-indole-4-carbaldehyde **1h** (0.2 mmol, 29.0 mg, 1.0 equiv), 1,3-dioxoisindolin-2-yl 2-bromopentanoate **2a** (0.4 mmol, 131.0 mg, 2.0 equiv), Zn power (0.6 mmol, 39.2 mg, 3.0 equiv) and LiI (0.4 mmol, 54.0 mg, 2.0 equiv) were added to a 10 mL Schlenk tube with a magnetic bar. Anhydrous 1,4-dioxane (1.0 mL) was charged and the solution was stirred at 70 °C for 12 h. The reaction mixture was concentrated under reduced pressure. The residual was purified by column chromatography on silica gel (eluent: petroleum ether/ethyl acetate = 50:1) to afford **3h** as a colorless liquid.

**R<sub>f</sub>** = 0.4 (eluent: petroleum ether/EtOAc = 50:1).

**Yield** 17.0 mg (46%).

#### NMR spectroscopy:

(*E*): <sup>1</sup>H NMR (600 MHz, CDCl<sub>3</sub>) δ 8.13 (s, 1H), 7.25 (d, *J* = 7.2 Hz, 1H), 7.21-7.17 (m, 2H), 7.16-7.13 (m, 1H), 6.80-6.74 (m, 1H), 6.73 (t, *J* = 2.4 Hz, 1H), 6.42-6.35 (m, 1H), 2.34-2.24 (m, 2H), 1.55 (q, *J* = 7.2 Hz, 2H), 0.99 (t, *J* = 7.2 Hz, 3H).

(*Z*): <sup>1</sup>H NMR (600 MHz, CDCl<sub>3</sub>) δ 8.13 (s, 1H), 7.28 (d, *J* = 7.2 Hz, 1H), 7.22-7.16 (m, 2H), 7.14-7.05 (m, 1H), 6.80-6.74 (m, 1H), 6.57 (t, *J* = 2.4 Hz, 1H), 5.83-5.76 (m, 1H), 2.34-2.24 (m, 2H), 1.47 (q, *J* = 7.2 Hz, 2H), 0.91 (t, *J* = 7.2 Hz, 3H).

(*E*): <sup>13</sup>C NMR (101 MHz, CDCl<sub>3</sub>) δ 136.20, 133.27, 131.90, 128.27, 126.66, 123.99, 122.16, 116.85, 109.56, 101.28, 35.60, 22.75, 13.78.

(*Z*): <sup>13</sup>C NMR (101 MHz, CDCl<sub>3</sub>) δ 135.76, 134.73, 130.46, 128.27, 125.85, 123.76, 121.72, 119.69, 109.56, 101.60, 31.19, 23.21, 13.87.

**HRMS** (ESI) calcd for (C<sub>13</sub>H<sub>16</sub>N)<sup>+</sup> [M + H]<sup>+</sup>: 186.1277, found: 186.1282.

#### (*E*)-1-methoxy-4-(pent-1-en-1-yl)benzene (3i)

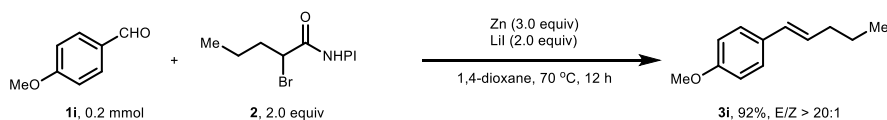

Under the argon atmosphere, 4-methoxybenzaldehyde **1i** (0.2 mmol, 27.2 mg, 1.0 equiv), 1,3-dioxoisindolin-2-yl 2-bromopentanoate **2a** (0.4 mmol, 131.0 mg, 2.0 equiv), Zn power (0.6 mmol, 39.2 mg, 3.0 equiv) and LiI (0.4 mmol, 54.0 mg, 2.0 equiv) were added to a 10 mL Schlenk tube with a magnetic bar. Anhydrous 1,4-dioxane (1.0 mL) was charged and the solution was stirred at 70 °C for 12 h. The reaction mixture was concentrated under reduced pressure. The residual was purified by column chromatography on silica gel (eluent: petroleum ether/ethyl acetate = 80:1) to afford **3i** as a colorless liquid.

**R<sub>f</sub>** = 0.7 (eluent: petroleum ether/EtOAc = 50:1).

**Yield** 32.4 mg (92%).

#### NMR spectroscopy:

<sup>1</sup>H NMR (400 MHz, CDCl<sub>3</sub>) δ 7.27 (d, *J* = 8.4 Hz, 2H), 6.83 (d, *J* = 7.6 Hz, 2H), 6.32 (d, *J* = 16.0 Hz, 1H), 6.12-6.00 (m, 1H), 3.79 (s, 3H), 2.16 (q, *J* = 7.2 Hz, 2H), 1.53-1.41 (m, 2H), 0.94 (t, *J* = 7.6 Hz, 3H).

<sup>13</sup>C NMR (101 MHz, CDCl<sub>3</sub>) δ 158.66, 130.86, 129.25, 128.84, 126.99, 113.93, 55.29, 35.11, 22.69, 13.73.

Spectroscopic data are in accordance with that reported in the literature.<sup>5</sup>

#### 1-methoxy-2-(pent-1-en-1-yl)benzene (**3j**)

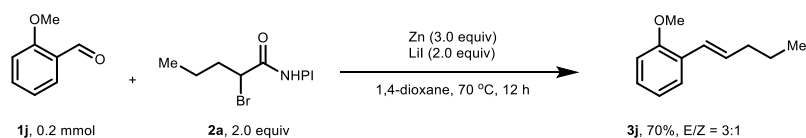

Under the argon atmosphere, 2-methoxybenzaldehyde **1j** (0.2 mmol, 27.2 mg, 1.0 equiv), 1,3-dioxoisindolin-2-yl 2-bromopentanoate **2a** (0.4 mmol, 131.0 mg, 2.0 equiv), Zn power (0.6 mmol, 39.2 mg, 3.0 equiv) and LiI (0.4 mmol, 54.0 mg, 2.0 equiv) were added to a 10 mL Schlenk tube with a magnetic bar. Anhydrous 1,4-dioxane (1.0 mL) was charged and the solution was stirred at 70 °C for 12 h. The reaction mixture was concentrated under reduced pressure. The residual was purified by column chromatography on silica gel (eluent: petroleum ether/ethyl acetate = 100:1) to afford **3j** as a colorless oil.

**R<sub>f</sub>** = 0.7 (eluent: petroleum ether/EtOAc = 50:1).

**Yield** 24.6 mg (70%).

**NMR spectroscopy:**

(E):  $^1\text{H}$  NMR (400 MHz,  $\text{CDCl}_3$ )  $\delta$  7.41 (dd,  $J = 7.6$  Hz, 1.6 Hz, 1H), 7.27-7.12 (m, 1H), 6.96-6.79 (m, 2H), 6.70 (d,  $J = 16.0$  Hz, 1H), 6.25-6.15 (m, 1H), 3.83 (s, 3H), 2.20 (m, 2H), 1.57-1.42 (m, 2H), 0.99-0.89 (m, 3H).

(Z):  $^1\text{H}$  NMR (400 MHz,  $\text{CDCl}_3$ )  $\delta$  7.41 (dd,  $J = 7.6$  Hz, 1.6 Hz, 1H), 7.27-7.12 (m, 1H), 6.96-6.79 (m, 2H), 6.51 (d,  $J = 16.0$  Hz, 1H), 5.76-5.68 (m, 1H), 3.83 (s, 3H), 2.20 (m, 2H), 1.57-1.42 (m, 2H), 0.99-0.89 (m, 3H).

(E):  $^{13}\text{C}$  NMR (101 MHz,  $\text{CDCl}_3$ )  $\delta$  156.30, 131.71, 130.06, 127.78, 126.39, 124.43, 120.66, 110.84, 55.48, 35.59, 22.70, 13.80.

(Z):  $^{13}\text{C}$  NMR (101 MHz,  $\text{CDCl}_3$ )  $\delta$  157.04, 132.91, 130.06, 127.96, 127.08, 124.17, 120.01, 110.41, 55.45, 30.81, 23.15, 13.92.

GCMS: calcd for  $\text{C}_{12}\text{H}_{16}\text{O}$  [M], 176.1, found 176.1.

**6-(pent-1-en-1-yl)-2,3-dihydrobenzo[*b*][1,4]dioxine (3k)**

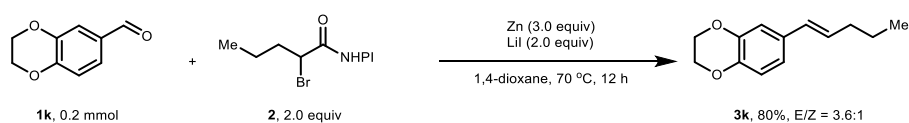

Under the argon atmosphere, 2,3-dihydrobenzo[*b*][1,4]dioxine-6-carbaldehyde **1k** (0.2 mmol, 32.8 mg, 1.0 equiv), 1,3-dioxoisindolin-2-yl 2-bromopentanoate **2a** (0.4 mmol, 131.0 mg, 2.0 equiv), Zn powder (0.6 mmol, 39.2 mg, 3.0 equiv) and LiI (0.4 mmol, 54.0 mg, 2.0 equiv) were added to a 10 mL Schlenk tube with a magnetic bar. Anhydrous 1,4-dioxane (1.0 mL) was charged and the solution was stirred at 70 °C for 12 h. The reaction mixture was concentrated under reduced pressure. The residual was purified by column chromatography on silica gel (eluent: petroleum ether/ethyl acetate = 50:1) to afford **3k** as a colorless liquid.

**R<sub>f</sub>** = 0.7 (eluent: petroleum ether/EtOAc = 50:1).

**Yield** 32.7 mg (80%).

**NMR spectroscopy:**

(E):  $^1\text{H}$  NMR (400 MHz,  $\text{CDCl}_3$ )  $\delta$  7.00 (dd,  $J = 7.2$  Hz, 1.6 Hz, 1H), 6.85-6.71 (m, 2H), 6.62 (d,  $J = 16.0$  Hz, 1H), 6.24 (dt,  $J = 16.00$  Hz, 6.8 Hz, 1H), 4.31-4.27 (m, 2H),

4.26-4.22 (m, 2H), 2.27-2.15 (m, 2H), 1.56-1.42 (m, 2H), 0.94 (dt,  $J = 6.4$  Hz, 3H).

(*Z*):  $^1\text{H}$  NMR (400 MHz,  $\text{CDCl}_3$ )  $\delta$  7.00 (dd,  $J = 7.2$  Hz, 1.6 Hz, 1H), 6.85-6.71 (m, 2H), 6.45 (d,  $J = 12.0$  Hz, 1H), 5.75 (dt,  $J = 11.6$  Hz, 7.6 Hz, 1H), 4.31-4.27 (m, 2H), 4.26-4.22 (m, 2H), 2.27-2.15 (m, 2H), 1.56-1.42 (m, 2H), 0.96 (dt,  $J = 7.6$  Hz, 3H).

(*E*):  $^{13}\text{C}$  NMR (101 MHz,  $\text{CDCl}_3$ )  $\delta$  143.64, 140.59, 132.33, 127.27, 123.60, 120.73, 118.58, 115.60, 64.36, 64.12, 35.56, 22.61, 13.77.

(*Z*):  $^{13}\text{C}$  NMR (101 MHz,  $\text{CDCl}_3$ )  $\delta$  143.48, 141.18, 133.63, 126.90, 123.16, 122.21, 120.21, 115.88, 64.49, 64.15, 30.91, 23.06, 13.89.

**HRMS** (APCI) calcd for  $(\text{C}_{13}\text{H}_{17}\text{O}_2)^+ [\text{M} + \text{H}]^+$ : 205.1223, found: 205.1222.

#### 4-(4-(pent-1-en-1-yl)phenyl)morpholine (**3l**)

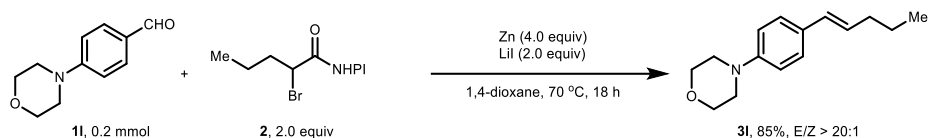

Under the argon atmosphere, 4-morpholinobenzaldehyde **1l** (0.2 mmol, 38.2 mg, 1.0 equiv), 1,3-dioxoisindolin-2-yl 2-bromopentanoate **2a** (0.4 mmol, 131.0 mg, 2.0 equiv), Zn power (0.8 mmol, 52.2 mg, 3.0 equiv) and LiI (0.4 mmol, 54.0 mg, 2.0 equiv) were added to a 10 mL Schlenk tube with a magnetic bar. Anhydrous 1,4-dioxane (1.0 mL) was charged and the solution was stirred at 70 °C for 18 h. The reaction mixture was concentrated under reduced pressure. The residual was purified by column chromatography on silica gel (eluent: petroleum ether/ethyl acetate = 50:1) to afford **3l** as a colorless liquid.

**R<sub>f</sub>** = 0.6 (eluent: petroleum ether/EtOAc = 50:1).

**Yield** 39.3 mg (85%).

#### **NMR spectroscopy:**

$^1\text{H}$  NMR (400 MHz,  $\text{CDCl}_3$ )  $\delta$  7.26 (d,  $J = 8.4$  Hz, 2H), 6.84 (d,  $J = 8.4$  Hz, 2H), 6.30 (d,  $J = 15.60$  Hz, 1H), 6.12-6.03 (m, 1H), 3.89-3.83 (m, 4H), 3.19-3.10 (m, 4H), 2.16 (q,  $J = 7.6$  Hz, 2H), 1.53-1.42 (m, 2H), 0.94 (t,  $J = 7.6$  Hz, 3H).

$^{13}\text{C}$  NMR (101 MHz,  $\text{CDCl}_3$ )  $\delta$  150.18, 130.10, 129.32, 128.49, 126.76, 115.70, 66.91, 49.42, 35.14, 22.72, 13.73.



HRMS (ESI) calcd for (C<sub>15</sub>H<sub>22</sub>NO)<sup>+</sup> [M + H]<sup>+</sup>: 232.1696, found: 232.1700.

### methyl(4-(pent-1-en-1-yl)phenyl)sulfane (**3m**)

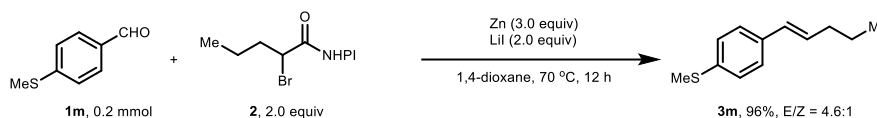

Under the argon atmosphere, 4-(methylthio)benzaldehyde **1m** (0.2 mmol, 30.4 mg, 1.0 equiv), 1,3-dioxoisindolin-2-yl 2-bromopentanoate **2a** (0.4 mmol, 131.0 mg, 2.0 equiv), Zn power (0.6 mmol, 39.2 mg, 3.0 equiv) and LiI (0.4 mmol, 54.0 mg, 2.0 equiv) were added to a 10 mL Schlenk tube with a magnetic bar. Anhydrous 1,4-dioxane (1.0 mL) was charged and the solution was stirred at 70 °C for 12 h. The reaction mixture was concentrated under reduced pressure. The residual was purified by column chromatography on silica gel (eluent: petroleum ether/ethyl acetate = 100:1) to afford **3m** as a brown liquid.

R<sub>f</sub> = 0.8 (eluent: petroleum ether/EtOAc = 50:1).

Yield 37.0 mg (96%).

### NMR spectroscopy:

(*E*): <sup>1</sup>H NMR (600 MHz, CDCl<sub>3</sub>) δ 7.26 (d, *J* = 8.4 Hz, 2H), 7.18 (d, *J* = 8.4 Hz, 2H), 6.32 (d, *J* = 16.2 Hz, 1H), 6.21-6.14 (m, 1H), 2.47 (s, 3H), 2.17 (q, *J* = 7.2 Hz, 2H), 1.51-1.45 (m, 2H), 0.95 (t, *J* = 7.8 Hz, 3H).

(*Z*): <sup>1</sup>H NMR (600 MHz, CDCl<sub>3</sub>) δ 7.26 (d, *J* = 8.4 Hz, 2H), 7.21 (d, *J* = 8.4 Hz, 2H), 6.34 (d, *J* = 12.0 Hz, 1H), 5.66-5.61 (m, 1H), 2.48 (s, 3H), 2.29 (q, *J* = 7.2 Hz, 2H), 1.51-1.45 (m, 2H), 0.95 (t, *J* = 7.8 Hz, 3H).

(*E*): <sup>13</sup>C NMR (101 MHz, CDCl<sub>3</sub>) δ 136.48, 135.20, 130.62, 129.26, 127.04, 126.36, 35.12, 22.55, 16.21, 13.72.

(*Z*): <sup>13</sup>C NMR (101 MHz, CDCl<sub>3</sub>) δ 136.31, 134.90, 132.92, 129.23, 128.22, 126.49, 30.77, 23.14, 16.02, 13.84.

Spectroscopic data are in accordance with that reported in the literature.<sup>3</sup>

### 4-(pent-1-en-1-yl)-N-phenylbenzamide (**3n**)

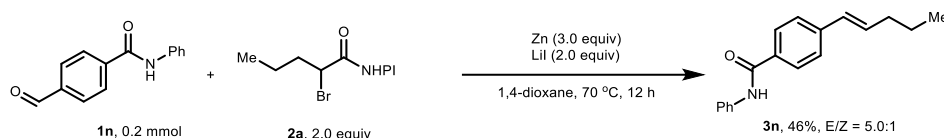

Under the argon atmosphere, 4-formyl-*N*-phenylbenzamide **1n** (0.2 mmol, 45.0 mg, 1.0 equiv), 1,3-dioxoisindolin-2-yl 2-bromopentanoate **2a** (0.4 mmol, 131.0 mg, 2.0 equiv), Zn power (0.6 mmol, 39.2 mg, 3.0 equiv) and LiI (0.4 mmol, 54.0 mg, 2.0 equiv) were added to a 10 mL Schlenk tube with a magnetic bar. Anhydrous 1,4-dioxane (1.0 mL) was charged and the solution was stirred at 70 °C for 12 h. The reaction mixture was concentrated under reduced pressure. The residual was purified by column chromatography on silica gel (eluent: petroleum ether/ethyl acetate = 20:1) to afford **3n** yield as a white solid.

**R<sub>f</sub>** = 0.6 (eluent: petroleum ether/EtOAc = 10:1).

**Yield** 24.4 mg (46%).

#### NMR spectroscopy:

(*E*): <sup>1</sup>H NMR (400 MHz, CDCl<sub>3</sub>) δ 7.80 (d, *J* = 7.6 Hz, 3H), 7.64 (d, *J* = 8.0 Hz, 2H), 7.43 (d, *J* = 8.4 Hz, 2H), 7.36 (t, *J* = 8.0 Hz, 2H), 7.14 (t, *J* = 7.2 Hz, 1H), 6.42 (d, *J* = 16.0 Hz, 1H), 6.39-6.29 (m, 1H), 2.23 (q, *J* = 6.8 Hz, 2H), 1.56-1.46 (m, 2H), 1.00-0.92 (m, 3H).

(*Z*): <sup>1</sup>H NMR (400 MHz, CDCl<sub>3</sub>) δ 7.83 (d, *J* = 8.0 Hz, 3H), 7.64 (d, *J* = 8.0 Hz, 2H), 7.43 (d, *J* = 8.4 Hz, 2H), 7.36 (t, *J* = 8.0 Hz, 2H), 7.14 (t, *J* = 7.2 Hz, 1H), 6.44 (d, *J* = 11.2 Hz, 1H), 5.82-5.74 (m, 1H), 2.31 (q, *J* = 7.2 Hz, 2H), 1.56-1.46 (m, 2H), 1.00-0.92 (m, 3H).

(*E*): <sup>13</sup>C NMR (101 MHz, CDCl<sub>3</sub>) δ 165.40, 141.59, 138.03, 133.76, 132.92, 129.09, 129.01, 127.32, 126.16, 124.47, 120.18, 35.19, 22.37, 13.74.

(*Z*): <sup>13</sup>C NMR (101 MHz, CDCl<sub>3</sub>) δ 165.40, 141.59, 138.03, 135.12, 132.92, 129.01, 127.97, 126.90, 124.51, 120.18, 30.79, 23.02, 13.81.

**HRMS** (ESI) calcd for (C<sub>18</sub>H<sub>20</sub>NO)<sup>+</sup> [M + H]<sup>+</sup>: 266.1539, found: 266.1544.

#### 1-(methylsulfonyl)-4-(pent-1-en-1-yl)benzene (**3o**)

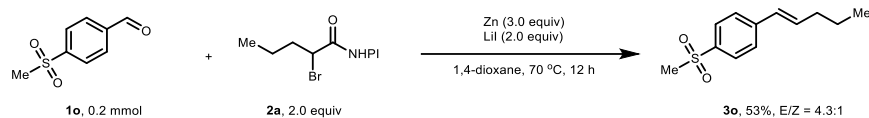

Under the argon atmosphere, 4-(methylsulfonyl)benzaldehyde **1o** (0.2 mmol, 36.8 mg, 1.0 equiv), 1,3-dioxoisindolin-2-yl 2-bromopentanoate **2a** (0.4 mmol, 131.0 mg, 2.0 equiv), Zn power (0.6 mmol, 39.2 mg, 3.0 equiv) and LiI (0.4 mmol, 54.0 mg, 2.0 equiv) were added to a 10 mL Schlenk tube with a magnetic bar. Anhydrous 1,4-dioxane (1.0 mL) was charged and the solution was stirred at 70 °C for 12 h. The reaction mixture was concentrated under reduced pressure. The residual was purified by column chromatography on silica gel (eluent: petroleum ether/ethyl acetate = 10:1) to afford **3o** as a yellow solid.

**R<sub>f</sub>** = 0.5 (eluent: petroleum ether/EtOAc = 5:1).

**Yield** 24.0 mg (53%).

#### NMR spectroscopy:

(*E*): <sup>1</sup>H NMR (600 MHz, CDCl<sub>3</sub>) δ 7.85 (d, *J* = 9.0 Hz, 2H), 7.47 (d, *J* = 8.4 Hz, 2H), 6.48-6.38 (m, 2H), 3.04 (s, 3H), 2.26-2.21 (m, 2H), 1.56-1.48 (m, 2H), 0.99-0.93 (m, 3H).

(*Z*): <sup>1</sup>H NMR (600 MHz, CDCl<sub>3</sub>) δ 7.89 (d, *J* = 9.0 Hz, 2H), 7.44 (d, *J* = 8.4 Hz, 2H), 6.48-6.38 (m, 1H), 5.87-5.81 (m, 1H), 3.06 (s, 3H), 2.31-2.27 (m, 2H), 1.56-1.48 (m, 2H), 0.99-0.93 (m, 3H).

(*E*): <sup>13</sup>C NMR (151 MHz, CDCl<sub>3</sub>) δ 143.46, 138.27, 135.63, 128.42, 127.69, 126.55, 44.61, 35.17, 22.23, 13.69.

(*Z*): <sup>13</sup>C NMR (151 MHz, CDCl<sub>3</sub>) δ 143.46, 136.46, 134.31, 129.46, 127.26, 126.55, 44.61, 30.72, 29.92, 13.76.

**HRMS** (ESI) calcd for (C<sub>12</sub>H<sub>17</sub>SO<sub>2</sub>)<sup>+</sup> [M + H]<sup>+</sup>: 225.0944, found: 225.0947.

#### methyl-4-(pent-1-en-1-yl)benzoate (**3p**)

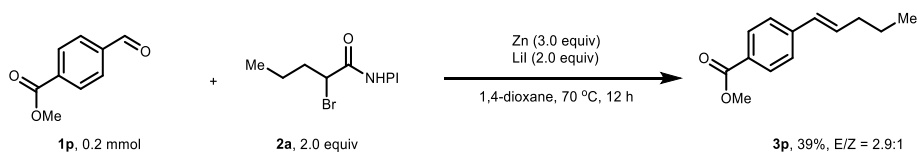

Under the argon atmosphere, methyl 4-formylbenzoate **1p** (0.2 mmol, 32.8 mg, 1.0 equiv), 1,3-dioxoisindolin-2-yl 2-bromopentanoate **2a** (0.4 mmol, 131.0 mg, 2.0

equiv), Zn power (0.6 mmol, 39.2 mg, 3.0 equiv) and LiI (0.4 mmol, 54.0 mg, 2.0 equiv) were added to a 10 mL Schlenk tube with a magnetic bar. Anhydrous 1,4-dioxane (1.0 mL) was charged and the solution was stirred at 70 °C for 12 h. The reaction mixture was concentrated under reduced pressure. The residual was purified by column chromatography on silica gel (eluent: petroleum ether/ethyl acetate = 30:1) to afford **3p** as a colorless liquid.

**R<sub>f</sub>** = 0.8 (eluent: petroleum ether/EtOAc = 30:1).

**Yield** 16.0 mg (39%).

#### NMR spectroscopy:

(*E*): <sup>1</sup>H NMR (400 MHz, CDCl<sub>3</sub>) δ 7.95 (d, *J* = 8.4 Hz, 2H), 7.38 (d, *J* = 8.4 Hz, 2H), 6.47-6.31 (m, 2H), 3.90 (s, 3H), 2.25-2.17 (m, 2H), 1.56-1.45 (m, 2H), 0.95 (t, *J* = 7.2 Hz, 3H).

(*Z*): <sup>1</sup>H NMR (400 MHz, CDCl<sub>3</sub>) δ 7.99 (d, *J* = 8.4 Hz, 2H), 7.38 (d, *J* = 8.4 Hz, 2H), 6.47-6.31 (m, 1H), 5.80-5.72 (m, 1H), 3.91 (s, 3H), 2.34-2.26 (m, 2H), 1.56-1.45 (m, 2H), 0.94 (t, *J* = 7.2 Hz, 3H).

(*E*): <sup>13</sup>C NMR (151 MHz, CDCl<sub>3</sub>) δ 167.02, 142.50, 133.99, 129.88, 129.21, 128.66, 125.76, 51.96, 35.19, 22.34, 13.71.

(*Z*): δ <sup>13</sup>C NMR (151 MHz, CDCl<sub>3</sub>) δ 167.02, 142.50, 135.22, 129.44, 128.27, 128.14, 125.76, 51.96, 30.79, 23.00, 13.78.

Spectroscopic data are in accordance with that reported in the literature.<sup>6</sup>

#### 1-ethynyl-2-(pent-1-en-1-yl)benzene (**3q**)

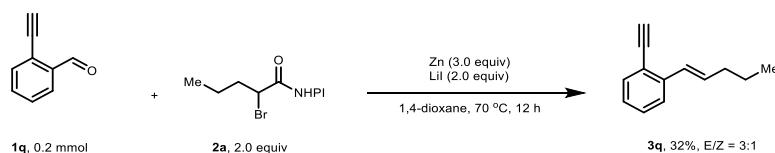

Under the argon atmosphere, 2-ethynylbenzaldehyde **1q** (0.2 mmol, 26.0 mg, 1.0 equiv), 1,3-dioxoisindolin-2-yl 2-bromopentanoate **2a** (0.4 mmol, 131.0 mg, 2.0 equiv), Zn power (0.6 mmol, 39.2 mg, 3.0 equiv) and LiI (0.4 mmol, 54.0 mg, 2.0 equiv) were added to a 10 mL Schlenk tube with a magnetic bar. Anhydrous 1,4-dioxane (1.0 mL) was charged and the solution was stirred at 70 °C for 12 h. The reaction mixture was concentrated under reduced pressure. The residual was purified by column

chromatography on silica gel (eluent: petroleum ether/ethyl acetate = 100:1) to afford **3q** as a colorless liquid.

**R<sub>f</sub>** = 0.8 (eluent: petroleum ether/EtOAc = 50:1).

**Yield** 11.0 mg (32%).

**NMR spectroscopy:**

(*E*): <sup>1</sup>H NMR (400 MHz, CDCl<sub>3</sub>) δ 7.52 (d, *J* = 8.0 Hz, 1H), 7.46 (d, *J* = 8.0 Hz, 1H), 7.33-7.24 (m, 1H), 7.14 (t, *J* = 7.6 Hz, 1H), 6.88 (d, *J* = 16.0 Hz, 1H), 6.36-6.25 (m, 1H), 3.31 (s, 1H), 2.24 (q, *J* = 7.2 Hz, 2H), 1.55-1.42 (m, 2H), 0.97 (t, *J* = 7.2 Hz, 3H).

(*Z*): <sup>1</sup>H NMR (400 MHz, CDCl<sub>3</sub>) δ 7.52 (d, *J* = 8.0 Hz, 1H), 7.46 (d, *J* = 8.0 Hz, 1H), 7.33-7.24 (m, 1H), 7.14 (t, *J* = 7.6 Hz, 1H), 6.68 (d, *J* = 11.6 Hz, 1H), 5.83-5.75 (m, 1H), 3.28 (s, 1H), 2.24 (q, *J* = 7.2 Hz, 2H), 1.55-1.42 (m, 2H), 0.92 (t, *J* = 7.2 Hz, 3H).

(*E*): <sup>13</sup>C NMR (101 MHz, CDCl<sub>3</sub>) δ 140.08, 133.31, 133.11, 128.84, 127.70, 126.39, 124.58, 120.08, 82.30, 81.38, 35.27, 22.48, 13.73.

(*Z*): <sup>13</sup>C NMR (101 MHz, CDCl<sub>3</sub>) δ 140.08, 134.15, 132.88, 128.84, 128.28, 127.26, 124.58, 120.08, 82.30, 81.32, 30.72, 23.00, 13.81.

Spectroscopic data are in accordance with that reported in the literature.<sup>7</sup>

**4,4,5,5-tetramethyl-2-(4-(pent-1-en-1-yl)phenyl)-1,3,2-dioxaborolane (3r)**

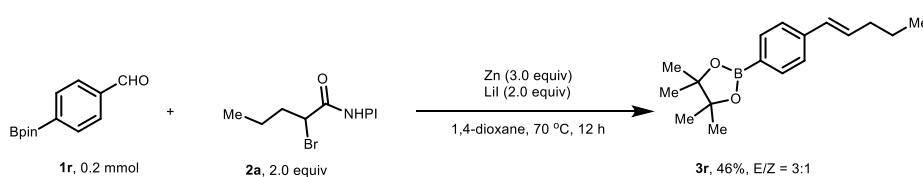

Under the argon atmosphere, 4-formylphenylboronic acid pinacol cyclic ester **1r** (0.2 mmol, 21.0 mg, 1.0 equiv), 1,3-dioxoisindolin-2-yl 2-bromopentanoate **2a** (0.4 mmol, 131.0 mg, 2.0 equiv), Zn power (0.6 mmol, 39.2 mg, 3.0 equiv) and LiI (0.4 mmol, 54.0 mg, 2.0 equiv) were added to a 10 mL Schlenk tube with a magnetic bar. Anhydrous 1,4-dioxane (1.0 mL) was charged and the solution was stirred at 70 °C for 12 h. The reaction mixture was concentrated under reduced pressure. The residual was purified by column chromatography on silica gel (eluent: petroleum ether/ethyl acetate = 100:1) to afford **3r** as a colorless liquid.

**R<sub>f</sub>** = 0.8 (eluent: petroleum ether/EtOAc = 50:1).

**Yield** 25.0 mg (46%).

**NMR spectroscopy:**

(*E*): <sup>1</sup>H NMR (400 MHz, CDCl<sub>3</sub>) δ 7.73 (d, *J* = 7.6 Hz, 2H), 7.34 (d, *J* = 7.6 Hz, 2H), 6.39 (d, *J* = 16.0 Hz, 1H), 6.30 (dt, *J* = 15.6 Hz, 6.4 Hz, 1H), 2.20 (q, *J* = 7.2 Hz, 2H), 1.55-1.41 (m, 2H), 1.34 (s, 12H), 0.95 (t, *J* = 7.2 Hz, 3H).

(*Z*): <sup>1</sup>H NMR (400 MHz, CDCl<sub>3</sub>) δ 7.77 (d, *J* = 7.6 Hz, 2H), 7.28 (d, *J* = 7.6 Hz, 2H), 6.42 (d, *J* = 12.0 Hz, 1H), 5.70 (dt, *J* = 11.6 Hz, 7.2 Hz, 1H), 2.30 (q, *J* = 7.2 Hz, 2H), 1.55-1.41 (m, 2H), 1.34 (s, 12H), 0.92 (t, *J* = 7.2 Hz, 3H).

(*E*): <sup>13</sup>C NMR (101 MHz, CDCl<sub>3</sub>) δ 140.73, 135.02, 132.19, 129.99, 125.25, 83.68, 35.18, 24.86, 22.45, 13.73.

(*Z*): <sup>13</sup>C NMR (101 MHz, CDCl<sub>3</sub>) δ 140.73, 134.58, 133.90, 128.92, 128.09, 83.72, 30.75, 24.86, 23.10, 13.80.

**HRMS** (ESI) calcd for (C<sub>17</sub>H<sub>26</sub>BO<sub>2</sub>)<sup>+</sup> [M + H]<sup>+</sup>: 273.2020, found: 273.2012.

**1-iodo-4-(pent-1-en-1-yl)benzene (3s)**

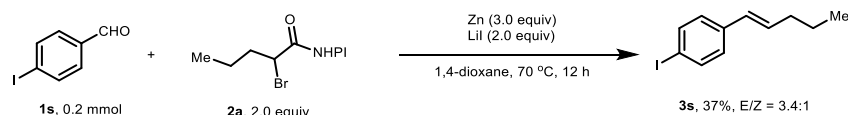

Under the argon atmosphere, 4-iodobenzaldehyde **1s** (0.2 mmol, 46.4 mg, 1.0 equiv), 1,3-dioxoisindolin-2-yl 2-bromopentanoate **2a** (0.4 mmol, 131.0 mg, 2.0 equiv), Zn power (0.6 mmol, 39.2 mg, 3.0 equiv) and LiI (0.4 mmol, 54.0 mg, 2.0 equiv) were added to a 10 mL Schlenk tube with a magnetic bar. Anhydrous 1,4-dioxane (1.0 mL) was charged and the solution was stirred at 70 °C for 12 h. The reaction mixture was concentrated under reduced pressure. The residual was purified by column chromatography on silica gel (eluent: petroleum ether/ethyl acetate = 100:1) to afford **3s** as a colorless liquid.

**R<sub>f</sub>** = 0.8 (eluent: petroleum ether/EtOAc = 50:1).

**Yield** 20.0 mg (37%).

**NMR spectroscopy:**

(*E*): <sup>1</sup>H NMR (600 MHz, CDCl<sub>3</sub>) δ 7.60 (d, *J* = 8.4 Hz, 2H), 7.07 (d, *J* = 8.4 Hz, 2H),

6.29 (d,  $J = 16.2$  Hz, 1H), 6.23 (dt,  $J = 16.2$  Hz, 6.6 Hz, 1H), 2.17 (q,  $J = 7.2$  Hz, 2H), 1.52-1.42 (m, 2H), 0.94 (t,  $J = 7.2$  Hz, 3H).

(Z):  $^1\text{H}$  NMR (600 MHz,  $\text{CDCl}_3$ )  $\delta$  7.64 (d,  $J = 7.8$  Hz, 2H), 7.01 (d,  $J = 7.8$  Hz, 2H), 6.31 (d,  $J = 13.6$  Hz, 1H), 5.69 (dt,  $J = 11.4$  Hz, 7.2 Hz, 1H), 2.26 (qd,  $J = 7.8$  Hz, 1.8 Hz, 2H), 1.52-1.42 (m, 2H), 0.93 (t,  $J = 7.8$  Hz, 3H).

(E):  $^{13}\text{C}$  NMR (151 MHz,  $\text{CDCl}_3$ )  $\delta$  137.49, 137.19, 132.05, 130.66, 128.88, 127.77, 35.11, 22.42, 13.75.

(Z):  $^{13}\text{C}$  NMR (151 MHz,  $\text{CDCl}_3$ )  $\delta$  137.47, 137.19, 134.02, 130.66, 128.88, 127.82, 30.67, 23.06, 13.85.

Spectroscopic data are in accordance with that reported in the literature.<sup>8</sup>

#### 4,4'-di-pent-1-en-1-yl-1,1'-biphenyl (3t)

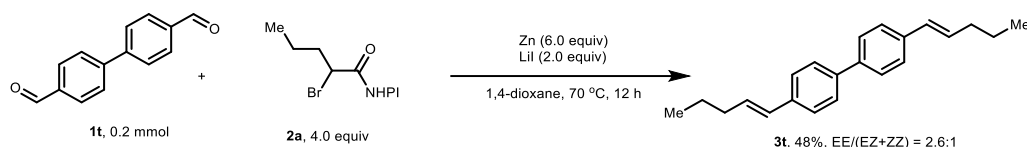

Under the argon atmosphere, [1,1'-biphenyl]-4,4'-dicarbaldehyde **1t** (0.2 mmol, 42.0 mg, 1.0 equiv), 1,3-dioxoisindolin-2-yl 2-bromopentanoate **2a** (0.8 mmol, 262.0 mg, 2.0 equiv), Zn power (0.6 mmol, 80.2 mg, 3.0 equiv) and LiI (0.4 mmol, 54.0 mg, 2.0 equiv) were added to a 10 mL Schlenk tube with a magnetic bar. Anhydrous 1,4-dioxane (1.0 mL) was charged and the solution was stirred at 70 °C for 12 h. The reaction mixture was concentrated under reduced pressure. The residual was purified by column chromatography on silica gel (eluent: petroleum ether/ethyl acetate = 100:1) to afford **3t** as a white solid.

**R<sub>f</sub>** = 0.8 (eluent: petroleum ether/EtOAc = 50:1).

**Yield** 27.8 mg (48%).

#### NMR spectroscopy:

(E):  $^1\text{H}$  NMR (400 MHz,  $\text{CDCl}_3$ )  $\delta$  7.61-7.50 (m, 4H), 7.45-7.34 (m, 4H), 6.43 (d,  $J = 16.0$  Hz, 2H), 5.75-5.66 (m, 2H), 2.23 (q,  $J = 7.2$  Hz, 4H), 1.58-1.47 (m, 4H), 0.99 (t,  $J = 7.6$  Hz, 6H).

(Z):  $^1\text{H}$  NMR (400 MHz,  $\text{CDCl}_3$ )  $\delta$  7.61-7.50 (m, 4H), 7.45-7.34 (m, 4H), 6.46 (d,  $J =$

11.6 Hz, 2H), 6.33-6.23 (m, 2H), 2.38 (qd,  $J = 7.6$  Hz, 2.00 Hz, 4H), 1.58-1.47 (m, 4H), 0.98 (t,  $J = 7.6$  Hz, 6H).

(*E*):  $^{13}\text{C}$  NMR (101 MHz,  $\text{CDCl}_3$ )  $\delta$  139.20, 136.94, 133.26, 131.12, 129.51, 129.22, 128.47, 126.90, 126.53, 126.34, 35.21, 22.59, 13.75.

$^{13}\text{C}$  NMR (101 MHz,  $\text{CDCl}_3$ )  $\delta$  138.86, 136.81, 133.30, 131.16, 129.51, 129.25, 128.47, 126.99, 126.62, 126.36, 30.88, 23.19, 13.88.

HRMS (APCI) calcd for  $(\text{C}_{22}\text{H}_{27})^+ [\text{M} + \text{H}]^+$ : 291.2107, found: 291.2105.

### ((3*E*,5*E*)-nona-3,5-dien-1-yl)benzene (**3u**)

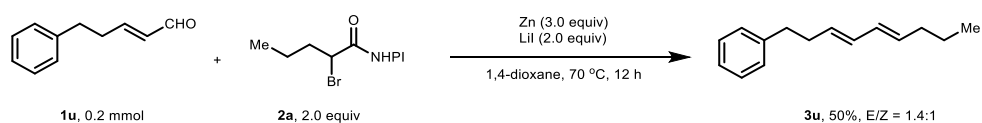

Under the argon atmosphere, (*E*)-5-phenylpent-2-enal **1u** (0.2 mmol, 32.0 mg, 1.0 equiv), 1,3-dioxoisindolin-2-yl 2-bromopentanoate **2a** (0.4 mmol, 131.0 mg, 2.0 equiv), Zn power (0.6 mmol, 39.2 mg, 3.0 equiv) and LiI (0.4 mmol, 54.0 mg, 2.0 equiv) were added to a 10 mL Schlenk tube with a magnetic bar. Anhydrous 1,4-dioxane (1.0 mL) was charged and the solution was stirred at 70 °C for 12 h. The reaction mixture was concentrated under reduced pressure. The residual was purified by column chromatography on silica gel (eluent: petroleum ether/ethyl acetate = 100:1) to afford **3u** as a colorless liquid.

$R_f$  = 0.8 (eluent: petroleum ether/EtOAc = 50:1).

Yield 20.2 mg (50%).

#### NMR spectroscopy:

(*E*):  $^1\text{H}$  NMR (400 MHz,  $\text{CDCl}_3$ )  $\delta$  7.37-7.28 (m, 2H), 7.27-7.18 (m, 3H), 6.14-5.95 (m, 2H), 5.78-5.67 (m, 1H), 5.67-5.58 (m, 1H), 2.74 (q,  $J = 8.0$  Hz, 2H), 2.50-2.37 (m, 2H), 2.17 (q,  $J = 7.6$  Hz, 1H), 2.07 (q,  $J = 7.2$  Hz, 1H), 1.49-1.38 (m, 2H), 0.97-0.89 (m, 3H).

(*Z*):  $^1\text{H}$  NMR (400 MHz,  $\text{CDCl}_3$ )  $\delta$  7.37-7.28 (m, 2H), 7.27-7.18 (m, 3H), 6.43-6.32 (m, 1H), 6.14-5.95 (m, 1H), 5.67-5.58 (m, 1H), 5.41-5.32 (m, 1H), 2.74 (q,  $J = 8.0$  Hz, 2H), 2.50-2.37 (m, 2H), 2.17 (q,  $J = 7.6$  Hz, 1H), 2.07 (q,  $J = 7.2$  Hz, 1H), 1.49-1.38 (m, 2H), 0.97-0.89 (m, 3H).

(*E*):  $^{13}\text{C}$  NMR (101 MHz,  $\text{CDCl}_3$ )  $\delta$  141.97, 132.78, 130.96, 130.35, 128.42, 128.31,



126.30, 125.80, 35.92, 34.71, 34.47, 22.56, 13.71.

(Z):  $^{13}\text{C}$  NMR (101 MHz,  $\text{CDCl}_3$ )  $\delta$  141.90, 132.29, 131.10, 130.43, 128.62, 128.45, 126.30, 125.82, 35.88, 34.47, 29.77, 22.89, 13.77.

Spectroscopic data are in accordance with that reported in the literature.<sup>9</sup>

### ((1E,3E)-hepta-1,3-dien-1-yl)benzene (**3v**)

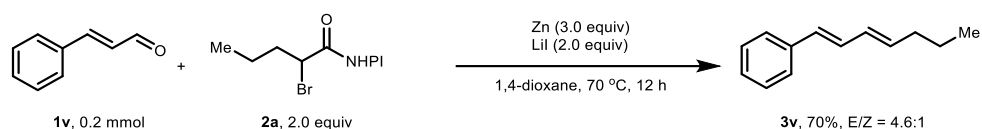

Under the argon atmosphere, cinnamaldehyde **1v** (0.2 mmol, 26.5 mg, 1.0 equiv), 1,3-dioxoisindolin-2-yl 2-bromopentanoate **2a** (0.4 mmol, 131.0 mg, 2.0 equiv), Zn powder (0.6 mmol, 39.2 mg, 3.0 equiv) and LiI (0.4 mmol, 54.0 mg, 2.0 equiv) were added to a 10 mL Schlenk tube with a magnetic bar. Anhydrous 1,4-dioxane (1.0 mL) was charged and the solution was stirred at 70 °C for 12 h. The reaction mixture was concentrated under reduced pressure. The residual was purified by column chromatography on silica gel (eluent: petroleum ether/ethyl acetate = 100:1) to afford **3v** as a colorless liquid.

$R_f$  = 0.8 (eluent: petroleum ether/EtOAc = 50:1).

**Yield** 24.0 mg (70%).

#### NMR spectroscopy:

(E):  $^1\text{H}$  NMR (400 MHz,  $\text{CDCl}_3$ )  $\delta$  7.37 (d,  $J$  = 7.6 Hz, 2H), 7.29 (t,  $J$  = 7.6 Hz, 2H), 7.23-7.15 (m, 1H), 6.76 (dd,  $J$  = 15.6 Hz, 10.4 Hz, 1H), 6.43 (d,  $J$  = 16.0 Hz, 1H), 6.25-6.13 (m, 1H), 5.87-5.77 (m, 1H), 2.13 (q,  $J$  = 7.6 Hz, 2H), 1.51-1.39 (m, 2H), 0.93 (t,  $J$  = 7.2 Hz, 3H).

(Z):  $^1\text{H}$  NMR (400 MHz,  $\text{CDCl}_3$ )  $\delta$  7.41 (d,  $J$  = 7.6 Hz, 2H), 7.29 (t,  $J$  = 7.6 Hz, 2H), 7.23-7.15 (m, 1H), 7.07 (dd,  $J$  = 15.2 Hz, 11.2 Hz, 1H), 6.52 (d,  $J$  = 15.6 Hz, 1H), 6.25-6.13 (m, 1H), 5.58-5.49 (m, 1H), 2.27 (q,  $J$  = 7.6 Hz, 2H), 1.51-1.39 (m, 2H), 0.93 (t,  $J$  = 7.2 Hz, 3H).

(E):  $^{13}\text{C}$  NMR (151 MHz,  $\text{CDCl}_3$ )  $\delta$  137.74, 135.75, 130.68, 129.97, 129.51, 128.54, 127.06, 126.14, 34.95, 22.50, 13.72.

(Z):  $^{13}\text{C}$  NMR (151 MHz,  $\text{CDCl}_3$ )  $\delta$  133.12, 131.98, 128.89, 128.57, 127.32, 126.33, 124.57, 30.06, 22.90, 13.79.

Spectroscopic data are in accordance with that reported in the literature.<sup>10</sup>

### 2,6-dimethyldodeca-2,6,8-triene (**3w**)

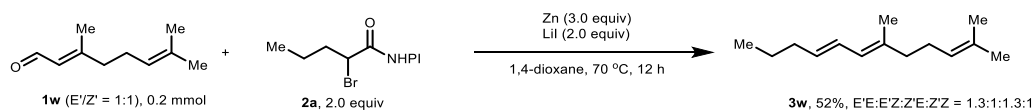

Under the argon atmosphere, Citral **1w** (0.2 mmol, 30.4 mg, 1.0 equiv), 1,3-dioxoisindolin-2-yl 2-bromopentanoate **2a** (0.4 mmol, 131.0 mg, 2.0 equiv), Zn power (0.6 mmol, 39.2 mg, 3.0 equiv) and LiI (0.4 mmol, 54.0 mg, 2.0 equiv) were added to a 10 mL Schlenk tube with a magnetic bar. Anhydrous 1,4-dioxane (1.0 mL) was charged and the solution was stirred at 70 °C for 12 h. The reaction mixture was concentrated under reduced pressure. The residual was purified by column chromatography on silica gel (eluent: petroleum ether/ethyl acetate = 100:1) to afford **3w** as a colorless liquid.

$R_f$  = 0.8 (eluent: petroleum ether/EtOAc = 50:1).

**Yield** 20.0 mg (52%).

#### NMR spectroscopy:

(*E'E* and *ZE'*):  $^1\text{H}$  NMR (600 MHz,  $\text{CDCl}_3$ )  $\delta$  6.29-6.15 (m, 1H), 6.08, (d,  $J$  = 10.2 Hz, 1H), 5.62-5.51 (m, 1H), 5.17-5.08 (m, 1H), 2.20-2.01 (m, 6H), 1.77-1.72 (m, 2H), 1.68 (s, 3H), 1.61 (d,  $J$  = 6.0 Hz, 3H), 1.46-1.37 (m, 2H), 0.95-0.87 (m, 3H).

(*E'Z* and *Z'Z*):  $^1\text{H}$  NMR (600 MHz,  $\text{CDCl}_3$ )  $\delta$  6.29-6.15 (m, 1H), 5.83-5.78 (m, 1H), 5.38-5.29 (m, 1H), 5.17-5.08 (m, 1H), 2.20-2.01 (m, 6H), 1.77-1.72 (m, 2H), 1.68 (s, 3H), 1.61 (d,  $J$  = 6.0 Hz, 3H), 1.46-1.37 (m, 2H), 0.95-0.87 (m, 3H).

(*E'E*, *ZE'*, *E'Z* and *Z'Z*):  $^{13}\text{C}$  NMR (151 MHz,  $\text{CDCl}_3$ )  $\delta$  138.68, 138.42, 136.55, 136.35, 132.33, 132.07, 131.80, 131.78, 131.61, 131.58, 129.87, 129.65, 126.80, 126.60, 125.56, 124.80, 124.67, 124.49, 124.16, 124.15, 124.14, 124.11, 120.75, 120.01, 40.28, 39.91, 35.07, 35.00, 32.46, 32.29, 29.72, 29.62, 29.56, 26.83, 26.68, 25.71, 24.19, 23.71, 22.95, 22.93, 22.78, 22.75, 17.72, 17.69, 17.67, 16.57, 16.45, 13.85, 13.77, 13.72.

Spectroscopic data are in accordance with that reported in the literature.<sup>11</sup>

### hept-3-en-1-ylbenzene (3x)

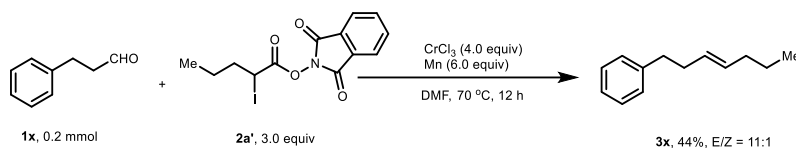

Under the argon atmosphere, 3-phenylpropanal **1x** (0.2 mmol, 27.0 mg, 1.0 equiv), 1,3-dioxoisindolin-2-yl 2-iodopentanoate **2a'** (0.6 mmol, 223.0 mg, 3.0 equiv),  $\text{CrCl}_3$  (0.8 mmol, 126.0 mg, 2.0 equiv) and Mn power (1.2 mmol, 66.0 mg, 6.0 equiv) were added to a 10 mL Schlenk tube with a magnetic bar. Anhydrous DMF (0.5 mL) was charged and the solution was stirred at 70 °C for 12 h. The reaction mixture was concentrated under reduced pressure. The residual was purified by column chromatography on silica gel (eluent: petroleum ether) to afford **3x** as a colorless liquid.  $R_f = 0.9$  (eluent: petroleum ether/EtOAc = 100:1).

**Yield** 15.4 mg (44%).

#### NMR spectroscopy:

(*E* and *Z*):  $^1\text{H}$  NMR (400 MHz,  $\text{CDCl}_3$ )  $\delta$  7.36-7.28 (m, 2H), 7.26-7.20 (m, 3H), 5.50-5.38 (m, 2H), 2.74-2.66 (m, 2H), 2.43-2.31 (m, 2H), 2.05-1.97 (m, 2H), 1.40-1.32 (m, 2H), 0.91 (t,  $J = 7.6$  Hz, 3H).

(*E* and *Z*):  $^{13}\text{C}$  NMR (101 MHz,  $\text{CDCl}_3$ )  $\delta$  142.19, 130.95, 130.49, 129.51, 128.86, 128.46, 128.25, 125.75, 125.68, 36.20, 36.06, 34.68, 34.47, 29.30, 29.19, 22.77, 22.67, 13.76, 13.63.

Spectroscopic data are in accordance with that reported in the literature.<sup>12</sup>

### 2-(hept-3-en-1-yl)-4,5-diphenyloxazole (3y)

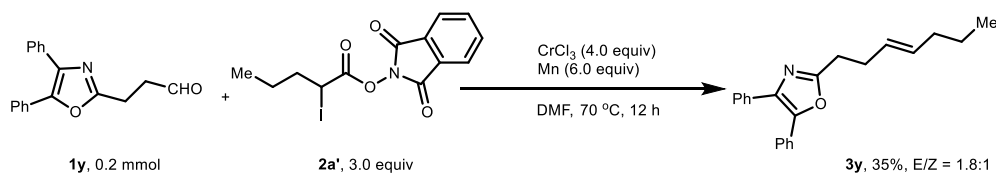

Under the argon atmosphere, 3-(4,5-diphenyloxazol-2-yl) propanal **1y** (0.2 mmol, 55.5 mg, 1.0 equiv), 1,3-dioxoisindolin-2-yl 2-iodopentanoate **2a'** (0.6 mmol, 223.0

mg, 3.0 equiv), CrCl<sub>3</sub> (0.8 mmol, 126.0 mg, 2.0 equiv) and Mn power (1.2 mmol, 66.0 mg, 6.0 equiv) were added to a 10 mL Schlenk tube with a magnetic bar. Anhydrous DMF (0.5 mL) was charged and the solution was stirred at 70 °C for 12 h. The reaction mixture was concentrated under reduced pressure. The residual was purified by column chromatography on silica gel (eluent: petroleum ether/ethyl acetate =100:1) to afford **3y** as a colorless liquid.

**R<sub>f</sub>** = 0.8 (eluent: petroleum ether/EtOAc = 50:1).

**Yield** 22.0 mg (35%).

#### NMR spectroscopy:

(*E* and *Z*): <sup>1</sup>H NMR (600 MHz, CDCl<sub>3</sub>) δ 7.64 (d, *J* = 8.4 Hz, 2H), 7.58 (d, *J* = 8.4 Hz, 2H), 7.36 (q, *J* = 7.2 Hz, 4H), 7.33-7.29 (m, 2H), 5.56-5.45 (m, 2H), 2.91 (q, *J* = 7.8 Hz, 2H), 2.63-2.58 (m, 1H), 2.56-2.51 (m, 1H), 2.05-1.93 (m, 2H), 1.39-1.30 (m, 2H), 0.90-0.83 (m, 3H).

(*E* and *Z*): <sup>13</sup>C NMR (151 MHz, CDCl<sub>3</sub>) δ 163.22, 163.17, 145.17, 145.11, 135.12, 135.07, 132.70, 132.67, 132.07, 131.63, 129.24, 129.21, 128.60, 128.52, 128.31, 128.29, 128.08, 127.96, 127.42, 126.46, 126.44, 34.58, 30.17, 29.29, 28.56, 28.44, 25.05, 22.74, 22.55, 13.72, 13.53.

**HRMS** (ESI) calcd for (C<sub>22</sub>H<sub>24</sub>NO)<sup>+</sup> [*M* + *H*]<sup>+</sup>: 318.1852, found: 318.1853.

#### hept-3-en-1-ylbenzene (**3z**)

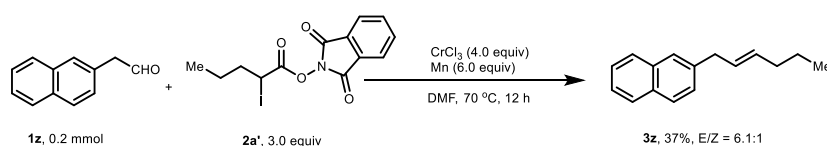

Under the argon atmosphere, 2-(naphthalen-2-yl)acetaldehyde **1z** (0.2 mmol, 34.0 mg, 1.0 equiv), 1,3-dioxoisindolin-2-yl 2-iodopentanoate **2a'** (0.6 mmol, 223.0 mg, 3.0 equiv), CrCl<sub>3</sub> (0.8 mmol, 126.0 mg, 2.0 equiv) and Mn power (1.2 mmol, 66.0 mg, 6.0 equiv) were added to a 10 mL Schlenk tube with a magnetic bar. Anhydrous DMF (0.5 mL) was charged and the solution was stirred at 70 °C for 12 h. The reaction mixture was concentrated under reduced pressure. The residual was purified by column chromatography on silica gel (eluent: petroleum ether) to afford **3z** as a colorless liquid.

**R<sub>f</sub>** = 0.9 (eluent: petroleum ether/EtOAc = 100:1).

**Yield** 15.5 mg (37%).

**NMR spectroscopy:**

(*E*):  $^1\text{H}$  NMR (400 MHz,  $\text{CDCl}_3$ )  $\delta$  7.84-7.74 (m, 3H), 7.62 (s, 1H), 7.49-7.37 (m, 2H), 7.34 (dd,  $J$  = 8.4 Hz, 1.6 Hz, 1H), 5.72-5.51 (m, 2H), 3.57 (d,  $J$  = 6.8 Hz, 2H), 2.23-2.14 (m, 2H), 1.51-1.41 (m, 2H), 1.01-0.88 (m, 3H).

(*Z*):  $^1\text{H}$  NMR (400 MHz,  $\text{CDCl}_3$ )  $\delta$  7.84-7.74 (m, 3H), 7.67 (s, 1H), 7.49-7.37 (m, 2H), 7.34 (dd,  $J$  = 8.4 Hz, 1.6 Hz, 1H), 5.72-5.51 (m, 2H), 3.49 (d,  $J$  = 6.8 Hz, 2H), 2.33-2.23 (m, 2H), 1.51-1.41 (m, 2H), 1.01-0.88 (m, 3H).

(*E* and *Z*):  $^{13}\text{C}$  NMR (101 MHz,  $\text{CDCl}_3$ )  $\delta$  138.78, 133.70, 132.03, 131.73, 131.10, 129.85, 128.02, 128.00, 127.92, 127.81, 127.60, 127.45, 127.32, 126.22, 126.09, 125.88, 125.39, 125.25, 125.13, 123.62, 33.67, 32.85, 31.57, 29.41, 22.87, 22.31, 13.97, 13.86.

Spectroscopic data are in accordance with that reported in the literature.<sup>13</sup>

**4-(pent-1-en-1-yl)phenyl  
methylpropanoate (3aa)**

**2-(4-(2,2-dichlorocyclopropyl)phenoxy)-2-**

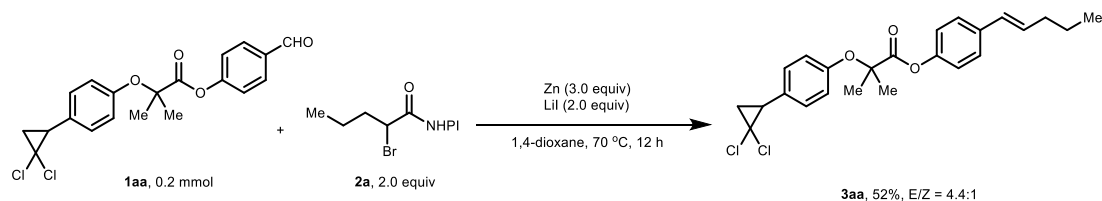

Under the argon atmosphere, 4-formylphenyl 2-(4-(2,2-dichlorocyclopropyl)phenoxy)-2-methylpropanoate **1aa** (0.2 mmol, 78.6 mg, 1.0 equiv), 1,3-dioxoisindolin-2-yl 2-bromopentanoate **2a** (0.4 mmol, 131.0 mg, 2.0 equiv), Zn power (0.6 mmol, 39.2 mg, 3.0 equiv) and LiI (0.4 mmol, 54.0 mg, 2.0 equiv) were added to a 10 mL Schlenk tube with a magnetic bar. Anhydrous 1,4-dioxane (1.0 mL) was charged and the solution was stirred at 70 °C for 12 h. The reaction mixture was concentrated under reduced pressure. The residual was purified by column chromatography on silica gel (eluent: petroleum ether/ethyl acetate = 30:1) to afford **3aa** as a colorless liquid.

**R<sub>f</sub>** = 0.6 (eluent: petroleum ether/EtOAc = 15:1).

**Yield** 45.0 mg (52%).

### NMR spectroscopy:

(*E*):  $^1\text{H}$  NMR (600 MHz,  $\text{CDCl}_3$ )  $\delta$  7.30 (d,  $J = 8.4$  Hz, 2H), 7.15 (d,  $J = 8.4$  Hz, 2H), 6.95-6.90 (m, 2H), 6.89-6.86 (m, 2H), 6.34 (d,  $J = 15.6$  Hz, 1H), 6.20-6.17 (m, 1H), 2.85 (dd,  $J = 10.2$  Hz, 7.8 Hz, 1H), 2.17 (q,  $J = 6.6$  Hz, 2H), 1.94 (dd,  $J = 10.2$  Hz, 7.2 Hz, 1H), 1.79 (t,  $J = 7.8$  Hz, 1H), 1.75 (s, 6H), 1.51-1.44 (m, 2H), 0.94 (t,  $J = 7.2$  Hz, 3H).

(*Z*):  $^1\text{H}$  NMR (600 MHz,  $\text{CDCl}_3$ )  $\delta$  7.24 (d,  $J = 8.4$  Hz, 2H), 7.16 (d,  $J = 8.4$  Hz, 2H), 6.95-6.90 (m, 2H), 6.89-6.86 (m, 2H), 6.36 (d,  $J = 13.2$  Hz, 1H), 5.68-5.63 (m, 1H), 2.85 (dd,  $J = 10.2$  Hz, 7.8 Hz, 1H), 2.26 (q,  $J = 6.6$  Hz, 2H), 1.94 (dd,  $J = 10.2$  Hz, 7.2 Hz, 1H), 1.79 (t,  $J = 7.8$  Hz, 1H), 1.75 (s, 6H), 1.51-1.44 (m, 2H), 0.92 (t,  $J = 7.2$  Hz, 3H).

(*E*):  $^{13}\text{C}$  NMR (101 MHz,  $\text{CDCl}_3$ )  $\delta$  172.87, 155.05, 149.29, 136.08, 131.47, 129.81, 128.87, 128.46, 126.80, 121.23, 118.66, 79.37, 60.86, 35.06, 34.86, 25.85, 25.51, 22.48, 13.71.

(*Z*):  $^{13}\text{C}$  NMR (101 MHz,  $\text{CDCl}_3$ )  $\delta$  172.87, 155.05, 148.93, 136.08, 133.44, 129.75, 128.87, 128.46, 127.85, 120.87, 118.66, 79.37, 60.86, 35.06, 30.59, 25.85, 25.51, 23.07, 13.82.

HRMS (ESI) calcd for  $(\text{C}_{24}\text{H}_{27}\text{O}_3\text{Cl}_2)^+ [\text{M} + \text{H}]^+$ : 433.1332, found: 433.1339.

### 4-(pent-1-en-1-yl)phenyl methylpropanoate (**3ab**)

### 2-(4-(2-(4-chlorobenzamido)ethyl)phenoxy)-2-methylpropanoate

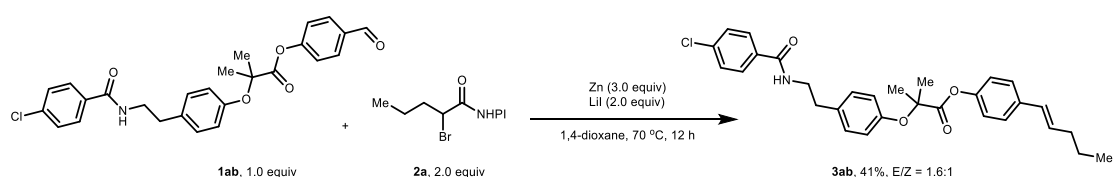

Under the argon atmosphere, 4-formylphenyl 2-(4-(2-(4-chlorobenzamido)ethyl)phenoxy)-2-methylpropanoate **1ab** (0.2 mmol, 93.2 mg, 1.0 equiv), 1,3-dioxoisindolin-2-yl 2-bromopentanoate **2a** (0.4 mmol, 131.0 mg, 2.0 equiv), Zn power (0.6 mmol, 39.2 mg, 3.0 equiv) and LiI (0.4 mmol, 54.0 mg, 2.0 equiv) were added to a 10 mL Schlenk tube with a magnetic bar. Anhydrous 1,4-dioxane (1.0 mL) was charged and the solution was stirred at 70 °C for 12 h. The reaction mixture

was concentrated under reduced pressure. The residual was purified by column chromatography on silica gel (eluent: petroleum ether/ethyl acetate = 10:1) to afford **3ab** as a colorless liquid.

**R<sub>f</sub>** = 0.4 (eluent: petroleum ether/EtOAc = 5:1).

**Yield** 41.5 mg (41%).

**NMR spectroscopy:**

(*E*): <sup>1</sup>H NMR (400 MHz, CDCl<sub>3</sub>) δ 7.62 (dd, *J* = 9.6 Hz, 2.4 Hz, 2H), 7.40-7.34 (m, 2H), 7.34-7.25 (m, 2H), 7.17-7.12 (m, 2H), 6.97-6.91 (m, 4H), 6.42-6.33 (m, 1H), 6.20-6.12 (m, 1H), 6.07 (s, 1H), 3.68 (q, *J* = 6.8 Hz, 2H), 2.89 (t, *J* = 6.6 Hz, 2H), 2.19 (qd, *J* = 6.6 Hz, 1.6 Hz, 2H), 1.74 (s, 6H), 1.52-1.41 (m, 2H), 0.97-0.88 (m, 3H).

(*Z*): <sup>1</sup>H NMR (400 MHz, CDCl<sub>3</sub>) δ 7.62 (dd, *J* = 9.6 Hz, 2.4 Hz, 2H), 7.40-7.34 (m, 2H), 7.34-7.25 (m, 2H), 7.17-7.12 (m, 2H), 6.99-6.90 (m, 4H), 6.42-6.33 (m, 1H), 6.07 (s, 1H), 5.71-5.62 (m, 1H), 3.68 (q, *J* = 6.8 Hz, 2H), 2.89 (t, *J* = 6.6 Hz, 2H), 2.27 (qd, *J* = 6.6 Hz, 1.6 Hz, 2H), 1.76 (s, 6H), 1.52-1.41 (m, 2H), 0.97-0.88 (m, 3H).

(*E*): <sup>13</sup>C NMR (151 MHz, CDCl<sub>3</sub>) δ 172.93, 166.39, 154.19, 149.31, 137.63, 136.11, 134.47, 133.00, 132.68, 131.54, 129.62, 128.82, 128.24, 126.83, 121.15, 119.51, 79.32, 41.22, 35.06, 34.74, 25.45, 22.47, 13.70.

(*Z*): <sup>13</sup>C NMR (151 MHz, CDCl<sub>3</sub>) δ 172.93, 166.39, 154.19, 148.96, 137.63, 135.89, 134.47, 133.49, 132.71, 131.54, 129.78, 128.82, 128.24, 123.55, 120.81, 119.55, 79.32, 41.22, 34.74, 30.59, 25.45, 23.06, 13.81.

**HRMS** (ESI) calcd for (C<sub>30</sub>H<sub>33</sub>NO<sub>4</sub>Cl)<sup>+</sup> [M + H]<sup>+</sup>: 506.2093, found: 506.2103.

**4-(pent-1-en-1-yl)phenyl 4-(*N,N*-dipropylsulfamoyl)benzoate (**3ac**)**

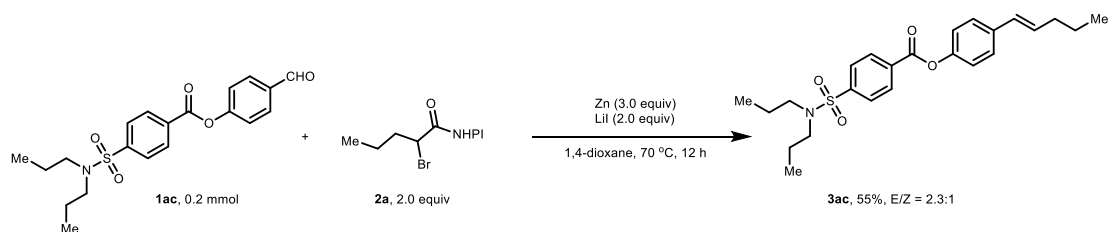

Under the argon atmosphere, 4-formylphenyl 4-(*N,N*-dipropylsulfamoyl)benzoate **1ac** (0.2 mmol, 77.9 mg, 1.0 equiv), 1,3-dioxoisindolin-2-yl 2-bromopentanoate **2a** (0.4 mmol, 131.0 mg, 2.0 equiv), Zn power (0.6 mmol, 39.2 mg, 3.0 equiv) and LiI (0.4 mmol, 54.0 mg, 2.0 equiv) were added to a 10 mL Schlenk tube with a magnetic bar.

Anhydrous 1,4-dioxane (1.0 mL) was charged and the solution was stirred at 70 °C for 12 h. The reaction mixture was concentrated under reduced pressure. The residual was purified by column chromatography on silica gel (eluent: petroleum ether/ethyl acetate = 30:1) to afford **3ac** as a colorless liquid.

$R_f$  = 0.6 (eluent: petroleum ether/EtOAc = 15:1).

**Yield** 47.0 mg (55%).

**NMR spectroscopy:**

(*E*):  $^1\text{H}$  NMR (600 MHz,  $\text{CDCl}_3$ )  $\delta$  8.33-8.29 (m, 2H), 7.96-7.92 (m, 2H), 7.40 (d,  $J$  = 9.0 Hz, 2H), 7.14 (d,  $J$  = 8.4 Hz, 2H), 6.39 (d,  $J$  = 15.6 Hz 1H), 6.22 (dt,  $J$  = 15.6 Hz, 7.2 Hz, 1H), 3.15-3.10 (m, 4H), 2.20 (qd,  $J$  = 7.8 Hz, 1.8 Hz, 2H), 1.60-1.54 (m, 4H), 1.53-1.46 (m, 2H), 0.99-0.93 (m, 3H), 0.89 (t,  $J$  = 7.2 Hz, 6H).

(*Z*):  $^1\text{H}$  NMR (600 MHz,  $\text{CDCl}_3$ )  $\delta$  8.33-8.29 (m, 2H), 7.96-7.92 (m, 2H), 7.34 (d,  $J$  = 8.4 Hz, 2H), 7.18 (d,  $J$  = 9.0 Hz, 2H), 6.41 (d,  $J$  = 12.0 Hz 1H), 5.70 (dt,  $J$  = 12.0 Hz, 7.2 Hz, 1H), 3.15-3.10 (m, 4H), 2.32 (qd,  $J$  = 7.8 Hz, 1.8 Hz, 2H), 1.60-1.54 (m, 4H), 1.53-1.46 (m, 2H), 0.99-0.93 (m, 3H), 0.89 (t,  $J$  = 7.2 Hz, 6H).

(*E*):  $^{13}\text{C}$  NMR (101 MHz,  $\text{CDCl}_3$ )  $\delta$  163.92, 149.38, 144.93, 136.23, 131.63, 130.78, 129.90, 128.87, 127.17, 126.95, 121.43, 49.95, 35.08, 22.50, 21.94, 13.71, 11.16.

(*Z*):  $^{13}\text{C}$  NMR (101 MHz,  $\text{CDCl}_3$ )  $\delta$  163.92, 149.01, 144.96, 136.02, 134.72, 133.57, 132.93, 128.87, 127.84, 123.94, 121.09, 49.95, 30.63, 23.09, 21.94, 13.83, 11.16.

**HRMS** (ESI) calcd for  $(\text{C}_{24}\text{H}_{32}\text{NO}_4\text{S})^+ [\text{M} + \text{H}]^+$ : 430.2047, found: 430.2053.

**4-(pent-1-en-1-yl)phenyl 5-(2,5-dimethylphenoxy)-2,2-dimethylpentanoate (**3ad**)**

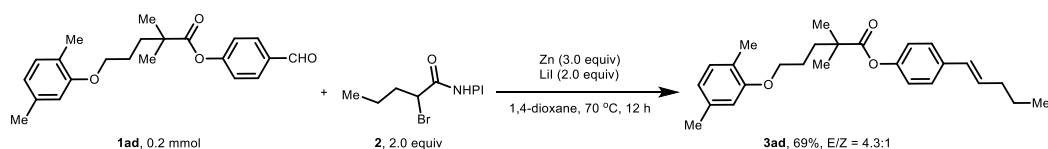

Under the argon atmosphere, 4-formylphenyl 5-(2,5-dimethylphenoxy)-2,2-dimethylpentanoate **1ad** (0.2 mmol, 70.9 mg, 1.0 equiv), 1,3-dioxoisindolin-2-yl 2-bromopentanoate **2a** (0.4 mmol, 131.0 mg, 2.0 equiv), Zn power (0.6 mmol, 39.2 mg, 3.0 equiv) and LiI (0.4 mmol, 54.0 mg, 2.0 equiv) were added to a 10 mL Schlenk tube with a magnetic bar. Anhydrous 1,4-dioxane (1.0 mL) was charged and the solution was



stirred at 70 °C for 12 h. The reaction mixture was concentrated under reduced pressure. The residual was purified by column chromatography on silica gel (eluent: petroleum ether/ethyl acetate = 40:1) to afford **3ad** as a colorless liquid.

**R<sub>f</sub>** = 0.8 (eluent: petroleum ether/EtOAc = 20:1).

**Yield** 54.4 mg (69%).

**NMR spectroscopy:**

(*E*): <sup>1</sup>H NMR (600 MHz, CDCl<sub>3</sub>) δ 7.34 (d, *J* = 8.4 Hz, 2H), 7.02 (d, *J* = 7.2 Hz, 1H), 6.97 (d, *J* = 8.4 Hz, 2H), 6.68 (d, *J* = 7.8 Hz, 1H), 6.64 (s, 1H), 6.36 (d, *J* = 16.2 Hz, 1H), 6.21-6.15 (m, 1H), 3.99 (s, 2H), 2.32 (s, 3H), 2.22-2.16 (m, 5H), 1.89 (s, 4H), 1.53-1.46 (m, 2H), 1.38 (d, *J* = 4.72 Hz, 6H), 0.96 (t, *J* = 7.8 Hz, 3H).

(*Z*): <sup>1</sup>H NMR (600 MHz, CDCl<sub>3</sub>) δ 7.27 (d, *J* = 7.8 Hz, 2H), 7.02 (d, *J* = 7.2 Hz, 1H), 6.97 (d, *J* = 8.4 Hz, 2H), 6.68 (d, *J* = 7.8 Hz, 1H), 6.64 (s, 1H), 6.40 (d, *J* = 11.4 Hz, 1H), 5.70-6.56 (m, 1H), 3.99 (s, 2H), 2.32 (s, 3H), 2.22-2.16 (m, 5H), 1.89 (s, 4H), 1.53-1.46 (m, 2H), 1.38 (d, *J* = 4.72 Hz, 6H), 0.96 (t, *J* = 7.8 Hz, 3H).

(*E*): <sup>13</sup>C NMR (151 MHz, CDCl<sub>3</sub>) δ 176.42, 156.91, 149.79, 136.51, 135.62, 131.13, 130.37, 129.72, 129.01, 126.77, 121.51, 120.76, 111.96, 67.81, 42.44, 37.19, 35.11, 25.30, 25.19, 22.54, 21.44, 15.84, 13.77.

(*Z*): <sup>13</sup>C NMR (151 MHz, CDCl<sub>3</sub>) δ 176.42, 156.91, 149.40, 136.51, 135.40, 133.23, 131.13, 130.37, 129.72, 128.00, 126.77, 123.65, 121.15, 67.81, 42.46, 37.19, 30.63, 25.30, 25.19, 23.14, 21.44, 15.84, 13.88.

**HRMS** (ESI) calcd for (C<sub>26</sub>H<sub>35</sub>O<sub>3</sub>)<sup>+</sup> [M + H]<sup>+</sup>: 395.2581, found: 395.2586.

**4-(pent-1-en-1-yl)phenyl 2-(3-benzoylphenyl)propanoate (3ae)**

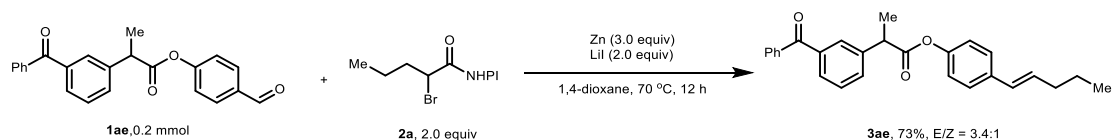

Under the argon atmosphere, 4-formylphenyl 2-(3-benzoylphenyl)propanoate **1ae** (0.2 mmol, 71.6 mg, 1.0 equiv), 1,3-dioxoisindolin-2-yl 2-bromopentanoate **2a** (0.4 mmol, 131.0 mg, 2.0 equiv), Zn power (0.6 mmol, 39.2 mg, 3.0 equiv) and LiI (0.4 mmol, 54.0 mg, 2.0 equiv) were added to a 10 mL Schlenk tube with a magnetic bar.

Anhydrous 1,4-dioxane (1.0 mL) was charged and the solution was stirred at 70 °C for 12 h. The reaction mixture was concentrated under reduced pressure. The residual was purified by column chromatography on silica gel (eluent: petroleum ether/ethyl acetate = 40:1) to afford **3ae** as a colorless liquid.

**R<sub>f</sub>** = 0.5 (eluent: petroleum ether/EtOAc = 40:1).

**Yield** 58.2 mg (73%).

**NMR spectroscopy:**

(*E*): <sup>1</sup>H NMR (400 MHz, CDCl<sub>3</sub>) δ 7.87-7.83 (m, 1H), 7.81 (d, *J* = 7.2 Hz, 2H), 7.72 (dt, *J* = 7.6 Hz, 1.6 Hz, 1H), 7.65-7.61 (m, 1H), 7.61-7.55 (m, 1H), 7.48 (q, *J* = 7.6 Hz, 3H), 7.32-7.27 (m, 1H), 7.26-7.21 (m, 1H), 6.98-6.90 (m, 2H), 6.39-6.29 (m, 1H), 6.20-6.10 (m, 1H), 4.07-3.98 (m, 1H), 2.20-2.11 (m, 2H), 1.65 (d, *J* = 7.2 Hz, 3H), 1.51-1.42 (m, 2H), 0.96-0.87 (m, 3H).

(*Z*): <sup>1</sup>H NMR (400 MHz, CDCl<sub>3</sub>) δ 7.87-7.83 (m, 1H), 7.81 (d, *J* = 7.2 Hz, 2H), 7.72 (dt, *J* = 7.6 Hz, 1.6 Hz, 1H), 7.65-7.61 (m, 1H), 7.61-7.55 (m, 1H), 7.48 (q, *J* = 7.6 Hz, 3H), 7.32-7.27 (m, 1H), 7.26-7.21 (m, 1H), 6.98-6.90 (m, 2H), 6.39-6.29 (m, 1H), 5.69-5.60 (m, 1H), 4.07-3.98 (m, 1H), 2.30-2.21 (m, 2H), 1.66 (d, *J* = 7.2 Hz, 3H), 1.51-1.42 (m, 2H), 0.96-0.87 (m, 3H).

(*E*): <sup>13</sup>C NMR (101 MHz, CDCl<sub>3</sub>) δ 196.40, 172.56, 149.49, 140.40, 138.16, 137.51, 135.87, 133.33, 132.54, 131.51, 130.08, 129.30, 129.19, 128.92, 128.77, 128.35, 126.75, 121.26, 45.55, 35.06, 22.49, 18.50, 13.71.

(*Z*): <sup>13</sup>C NMR (101 MHz, CDCl<sub>3</sub>) δ 196.40, 172.59, 149.12, 140.40, 138.16, 137.51, 135.64, 133.33, 132.54, 131.32, 129.70, 129.30, 129.19, 128.92, 128.77, 127.91, 126.75, 120.90, 45.55, 30.59, 23.08, 18.52, 13.81.

**HRMS** (ESI) calcd for (C<sub>27</sub>H<sub>27</sub>O<sub>3</sub>)<sup>+</sup> [M + H]<sup>+</sup>: 399.1955, found: 399.1960.

#### (4-(4-methoxyphenyl)but-3-en-1-yl)(methyl)sulfane (**3af**)

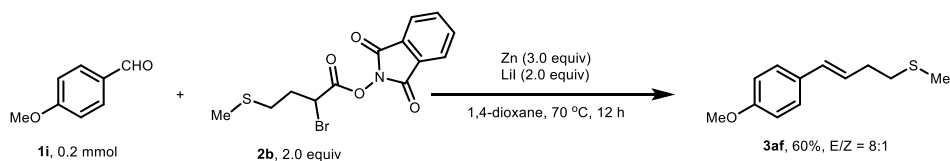

Under the argon atmosphere, 4-methoxybenzaldehyde **1i** (0.2 mmol, 27.2 mg, 1.0

equiv), 1,3-dioxoisindolin-2-yl 2-bromo-4-(methylthio)butanoate **2b** (0.4 mmol, 143.2 mg, 2.0 equiv), Zn power (0.6 mmol, 39.2 mg, 3.0 equiv) and LiI (0.4 mmol, 54.0 mg, 2.0 equiv) were added to a 10 mL Schlenk tube with a magnetic bar. Anhydrous 1,4-dioxane (1.0 mL) was charged and the solution was stirred at 70 °C for 12 h. The reaction mixture was concentrated under reduced pressure. The residual was purified by column chromatography on silica gel (eluent: petroleum ether/ethyl acetate = 80:1) to afford **3af** as a colorless liquid.

**R<sub>f</sub>** = 0.8 (eluent: petroleum ether/EtOAc = 40:1).

**Yield** 25.0 mg (60%).

#### NMR spectroscopy:

(*E*): <sup>1</sup>H NMR (400 MHz, CDCl<sub>3</sub>) δ 7.28 (d, *J* = 8.4 Hz, 2H), 6.83 (d, *J* = 8.8 Hz, 2H), 6.38 (d, *J* = 16.0 Hz, 1H), 6.09 (dt, *J* = 15.6 Hz, 7.2 Hz, 1H), 3.79 (s, 3H), 2.65-2.59 (m, 2H), 2.49 (q, *J* = 6.8 Hz, 2H), 2.14 (s, 3H).

(*Z*): <sup>1</sup>H NMR (400 MHz, CDCl<sub>3</sub>) δ 7.22 (d, *J* = 8.8 Hz, 2H), 6.86 (d, *J* = 8.4 Hz, 2H), 6.42 (d, *J* = 12.8 Hz, 1H), 5.60-5.55 (m, 1H), 3.81 (s, 3H), 2.65-2.59 (m, 2H), 2.49 (q, *J* = 6.8 Hz, 2H), 2.09 (s, 3H).

(*E*): <sup>13</sup>C NMR (101 MHz, CDCl<sub>3</sub>) δ 158.88, 130.55, 129.93, 127.19, 126.32, 113.95, 55.31, 34.19, 32.90, 15.67.

(*Z*): <sup>13</sup>C NMR (101 MHz, CDCl<sub>3</sub>) δ 158.38, 130.24, 129.93, 129.62, 128.85, 113.65, 55.31, 34.19, 32.90, 15.48.

**HRMS** (ESI) calcd for (C<sub>12</sub>H<sub>17</sub>OS)<sup>+</sup> [M + H]<sup>+</sup>: 209.0995, found: 209.0998.

#### 1-methoxy-4-(4-methylpent-1-en-1-yl)benzene (**3ag**)

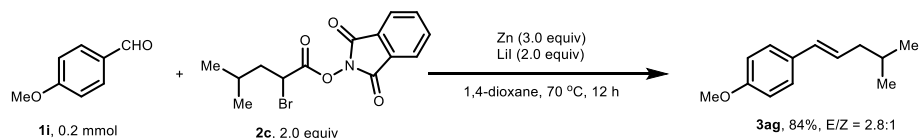

Under the argon atmosphere, 4-methoxybenzaldehyde **1i** (0.2 mmol, 27.2 mg, 1.0 equiv), 1,3-dioxoisindolin-2-yl 2-bromo-4-methylpentanoate **2c** (0.4 mmol, 136.1 mg, 2.0 equiv), Zn power (0.6 mmol, 39.2 mg, 3.0 equiv) and LiI (0.4 mmol, 54.0 mg, 2.0 equiv) were added to a 10 mL Schlenk tube with a magnetic bar. Anhydrous 1,4-dioxane

(1.0 mL) was charged and the solution was stirred at 70 °C for 12 h. The reaction mixture was concentrated under reduced pressure. The residual was purified by column chromatography on silica gel (eluent: petroleum ether/ethyl acetate = 80:1) to afford **3ag** (32.0 mg) in 84% yield as a colorless liquid.

$R_f$  = 0.8 (eluent: petroleum ether/EtOAc = 40:1).

**Yield** 32.0 mg (84%).

**NMR spectroscopy:**

(*E*):  $^1\text{H}$  NMR (400 MHz,  $\text{CDCl}_3$ )  $\delta$  7.29 (d,  $J$  = 8.8 Hz, 2H), 6.84 (dd,  $J$  = 8.8 Hz, 2H), 6.32 (d,  $J$  = 15.6 Hz, 1H), 6.14-6.03 (m, 1H), 3.81 (s, 3H), 2.08 (t,  $J$  = 6.80 Hz, 2H), 1.77-1.65 (m, 1H), 0.95 (d,  $J$  = 6.8 Hz, 6H).

(*Z*):  $^1\text{H}$  NMR (400 MHz,  $\text{CDCl}_3$ )  $\delta$  7.24 (d,  $J$  = 8.8 Hz, 2H), 6.88 (dd,  $J$  = 8.8 Hz, 2H), 6.39 (d,  $J$  = 12.4 Hz, 1H), 5.65-5.56 (m, 1H), 3.82 (s, 3H), 2.22 (t,  $J$  = 6.4 Hz, 2H), 1.77-1.65 (m, 1H), 0.95 (d,  $J$  = 6.8 Hz, 6H).

(*E*):  $^{13}\text{C}$  NMR (101 MHz,  $\text{CDCl}_3$ )  $\delta$  158.67, 130.15, 129.98, 127.73, 127.01, 113.93, 55.29, 42.42, 28.69, 22.38.

(*E*):  $^{13}\text{C}$  NMR (101 MHz,  $\text{CDCl}_3$ )  $\delta$  158.15, 130.87, 130.63, 130.49, 128.69, 113.54, 55.23, , 37.63, 29.09, 22.44.

Spectroscopic data are in accordance with that reported in the literature.<sup>14</sup>

**1-methoxy-4-(3-methylbut-1-en-1-yl)benzene (3ah)**

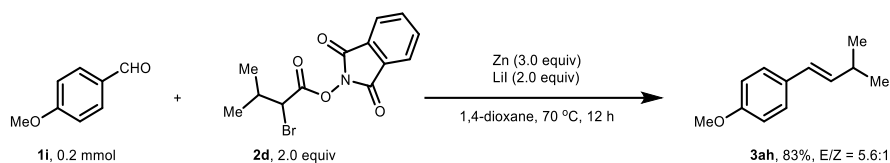

Under the argon atmosphere, 4-methoxybenzaldehyde **1i** (0.2 mmol, 27.2 mg, 1.0 equiv), 1,3-dioxoisindolin-2-yl 2-bromo-3-methylbutanoate **2d** (0.4 mmol, 130.5 mg, 2.0 equiv), Zn power (0.6 mmol, 39.2 mg, 3.0 equiv) and LiI (0.4 mmol, 54.0 mg, 2.0 equiv) were added to a 10 mL Schlenk tube with a magnetic bar. Anhydrous 1,4-dioxane (1.0 mL) was charged and the solution was stirred at 70 °C for 12 h. The reaction mixture was concentrated under reduced pressure. The residual was purified by column chromatography on silica gel (eluent: petroleum ether/ethyl acetate = 80:1) to afford **3ah** yield as a colorless liquid.

**R<sub>f</sub>** = 0.8 (eluent: petroleum ether/EtOAc = 40:1).

**Yield** 29.0 mg (83%).

**NMR spectroscopy:**

(*E*): <sup>1</sup>H NMR (400 MHz, CDCl<sub>3</sub>) δ 7.32-7.19 (m, 2H), 6.90-6.82 (m, 2H), 6.30 (d, *J* = 16.0 Hz 1H), 6.07 (dd, *J* = 16.0 Hz, 6.8 Hz, 1H), 3.81 (s, 3H), 2.50-2.40 (m, 1H), 1.09 (d, *J* = 6.8 Hz, 6H).

(*Z*): <sup>1</sup>H NMR (400 MHz, CDCl<sub>3</sub>) δ 7.32-7.19 (m, 2H), 6.90-6.82 (m, 2H), 6.25 (d, *J* = 11.6 Hz 1H), 5.40 (dd, *J* = 11.6 Hz, 10.4 Hz, 1H), 3.82 (s, 3H), 2.50-2.40 (m, 1H), 1.06 (d, *J* = 6.4 Hz, 6H).

(*E*): <sup>13</sup>C NMR (101 MHz, CDCl<sub>3</sub>) δ 158.63, 135.96, 127.04, 126.17, 113.92, 55.30, 31.50, 22.59.

(*Z*): <sup>13</sup>C NMR (101 MHz, CDCl<sub>3</sub>) δ 158.18, 139.11, 130.80, 129.81, 125.84, 113.60, 55.30, 27.12, 23.25.

Spectroscopic data are in accordance with that reported in the literature.<sup>15</sup>

**(*E*)-1-(3,3-dimethylbut-1-en-1-yl)-4-methoxybenzene (3ai)**

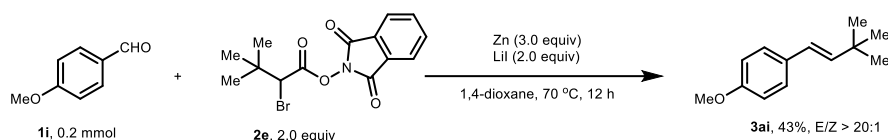

Under the argon atmosphere, 4-methoxybenzaldehyde **1i** (0.2 mmol, 27.2 mg, 1.0 equiv), 1,3-dioxoisindolin-2-yl 2-bromo-3,3-dimethylbutanoate **2e** (0.4 mmol, 136.1 mg, 2.0 equiv), Zn power (0.6 mmol, 39.2 mg, 3.0 equiv) and LiI (0.4 mmol, 54.0 mg, 2.0 equiv) were added to a 10 mL Schlenk tube with a magnetic bar. Anhydrous 1,4-dioxane (1.0 mL) was charged and the solution was stirred at 70 °C for 12 h. The reaction mixture was concentrated under reduced pressure. The residual was purified by column chromatography on silica gel (eluent: petroleum ether/ethyl acetate = 80:1) to afford **3ai** as a colorless liquid.

**R<sub>f</sub>** = 0.8 (eluent: petroleum ether/EtOAc = 40:1).

**Yield** 16.2 mg (43%).

**NMR spectroscopy:**

<sup>1</sup>H NMR (400 MHz, CDCl<sub>3</sub>) δ 7.29 (d, *J* = 8.8 Hz, 2H), 6.84 (d, *J* = 8.8 Hz, 2H), 6.25

(d,  $J = 16.0$  Hz, 1H), 6.12 (d,  $J = 16.0$  Hz, 1H), 3.80 (s, 3H), 1.11 (s, 9H).

$^{13}\text{C}$  NMR (101 MHz,  $\text{CDCl}_3$ )  $\delta$  158.64, 139.86, 130.90, 127.06, 123.90, 113.93, 55.30, 33.22, 29.70.

Spectroscopic data are in accordance with that reported in the literature.<sup>16</sup>

### 1-methoxy-4-(3-phenylprop-1-en-1-yl)benzene (**3aj**)

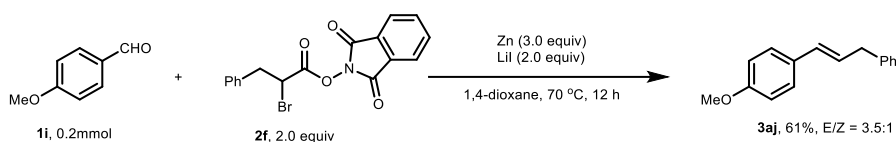

Under the argon atmosphere, 4-methoxybenzaldehyde **1i** (0.2 mmol, 27.2 mg, 1.0 equiv), 1,3-dioxoisindolin-2-yl 2-bromo-3-phenylpropanoate **2f** (0.4 mmol, 149.7 mg, 2.0 equiv), Zn power (0.6 mmol, 39.2 mg, 3.0 equiv) and LiI (0.4 mmol, 54.0 mg, 2.0 equiv) were added to a 10 mL Schlenk tube with a magnetic bar. Anhydrous 1,4-dioxane (1.0 mL) was charged and the solution was stirred at 70 °C for 12 h. The reaction mixture was concentrated under reduced pressure. The residual was purified by column chromatography on silica gel (eluent: petroleum ether/ethyl acetate = 80:1) to afford **3aj** as a colorless liquid.

**R<sub>f</sub>** = 0.8 (eluent: petroleum ether/EtOAc = 40:1).

**Yield** 27.5 mg (61%).

#### NMR spectroscopy:

(*E*):  $^1\text{H}$  NMR (400 MHz,  $\text{CDCl}_3$ )  $\delta$  7.40-7.23 (m, 7H), 6.88 (d,  $J = 8.8$  Hz, 2H), 6.46 (d,  $J = 15.6$  Hz, 1H), 6.27 (dt,  $J = 15.6$  Hz, 6.8 Hz, 1H), 3.84 (s, 3H), 3.58 (d,  $J = 6.4$  Hz, 2H).

(*Z*):  $^1\text{H}$  NMR (400 MHz,  $\text{CDCl}_3$ )  $\delta$  7.40-7.23 (m, 7H), 6.93 (d,  $J = 9.2$  Hz, 2H), 6.58 (d,  $J = 11.6$  Hz, 1H), 6.27 (dt,  $J = 11.2$  Hz, 7.6 Hz, 1H), 3.86 (s, 3H), 3.73 (d,  $J = 7.6$  Hz, 2H).

(*E*):  $^{13}\text{C}$  NMR (101 MHz,  $\text{CDCl}_3$ )  $\delta$  158.92, 140.50, 130.50, 129.95, 128.68, 128.49, 127.27, 127.11, 126.14, 113.99, 55.31, 39.37.

(*Z*):  $^{13}\text{C}$  NMR (101 MHz,  $\text{CDCl}_3$ )  $\delta$  158.53, 141.00, 130.39, 129.50, 129.21, 128.53, 128.38, 126.05, 113.74, 55.28, 34.71.

Spectroscopic data are in accordance with that reported in the literature.<sup>17</sup>

### 1-methoxy-4-(prop-1-en-1-yl)benzene (**3ak**)

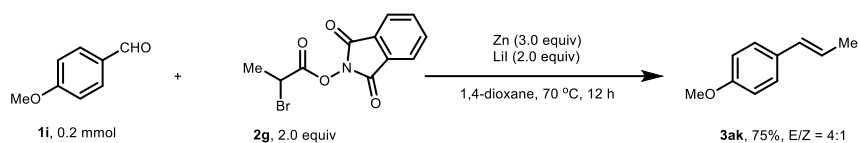

Under the argon atmosphere, 4-methoxybenzaldehyde **1i** (0.2 mmol, 27.2 mg, 1.0 equiv), 1,3-dioxoisindolin-2-yl 2-bromopropanoate **2g** (0.4 mmol, 119.2 mg, 2.0 equiv), Zn power (0.6 mmol, 39.2 mg, 3.0 equiv) and LiI (0.4 mmol, 54.0 mg, 2.0 equiv) were added to a 10 mL Schlenk tube with a magnetic bar. Anhydrous 1,4-dioxane (1.0 mL) was charged and the solution was stirred at 70 °C for 12 h. The reaction mixture was concentrated under reduced pressure. The residual was purified by column chromatography on silica gel (eluent: petroleum ether/ethyl acetate = 80:1) to afford **3ak** as a colorless liquid.

**R<sub>f</sub>** = 0.8 (eluent: petroleum ether/EtOAc = 40:1).

**Yield** 22.2 mg (75%).

#### NMR spectroscopy:

(*E*): <sup>1</sup>H NMR (400 MHz, CDCl<sub>3</sub>) δ 7.28-7.22 (m, 2H), 6.82 (d, *J* = 8.8 Hz, 2H), 6.33 (d, *J* = 16.4 Hz, 1H), 6.14-6.02 (m, 1H), 3.79 (s, 3H), 1.84 (dd, *J* = 6.4 Hz, 1.6 Hz, 3H).

(*Z*): <sup>1</sup>H NMR (400 MHz, CDCl<sub>3</sub>) δ 7.28-7.22 (m, 2H), 6.87 (d, *J* = 8.8 Hz, 2H), 6.37 (d, *J* = 10.8 Hz, 1H), 5.74-5.64 (m, 1H), 3.80 (s, 3H), 1.88 (dd, *J* = 7.2 Hz, 1.6 Hz, 3H).

(*E*): <sup>13</sup>C NMR (101 MHz, CDCl<sub>3</sub>) δ 158.59, 130.35, 126.89, 123.50, 113.91, 55.28, 18.44.

(*Z*): <sup>13</sup>C NMR (101 MHz, CDCl<sub>3</sub>) δ 158.11, 130.83, 130.02, 129.28, 125.13, 113.56, 55.26, 14.62.

Spectroscopic data are in accordance with that reported in the literature.<sup>18</sup>

### 1-methoxy-4-(3-methylpent-1-en-1-yl)benzene (**3al**)

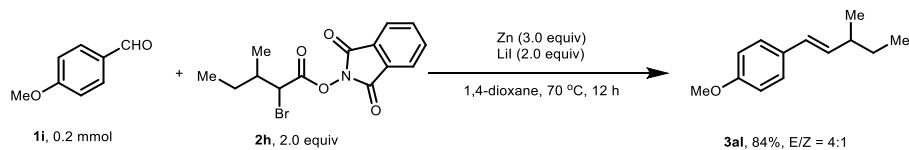

Under the argon atmosphere, 4-methoxybenzaldehyde **1i** (0.2 mmol, 27.2 mg, 1.0

equiv), 1,3-dioxoisindolin-2-yl 2-bromo-3-methylpentanoate **2h** (0.4 mmol, 136.1 mg, 2.0 equiv), Zn power (0.6 mmol, 39.2 mg, 3.0 equiv) and LiI (0.4 mmol, 54.0 mg, 2.0 equiv) were added to a 10 mL Schlenk tube with a magnetic bar. Anhydrous 1,4-dioxane (1.0 mL) was charged and the solution was stirred at 70 °C for 12 h. The reaction mixture was concentrated under reduced pressure. The residual was purified by column chromatography on silica gel (eluent: petroleum ether/ethyl acetate = 80:1) to afford **3al** as a colorless liquid.

**R<sub>f</sub>** = 0.8 (eluent: petroleum ether/EtOAc = 40:1).

**Yield** 32.0 mg (84%).

#### NMR spectroscopy:

(*E*): <sup>1</sup>H NMR (600 MHz, CDCl<sub>3</sub>) δ 7.29 (d, *J* = 8.4 Hz, 2H), 6.84 (d, *J* = 8.4 Hz, 2H), 6.30 (d, *J* = 16.2 Hz, 1H), 5.96 (dd, *J* = 15.6 Hz, 7.8 Hz, 1H), 3.81 (s, 3H), 2.23-2.19 (m, 1H), 1.44-1.38 (m, 2H), 1.06 (d, *J* = 7.2 Hz, 3H), 0.91 (t, *J* = 7.8 Hz, 3H).

(*Z*): <sup>1</sup>H NMR (600 MHz, CDCl<sub>3</sub>) δ 7.21 (d, *J* = 8.4 Hz, 2H), 6.84 (d, *J* = 8.4 Hz, 2H), 6.32 (d, *J* = 12.6 Hz, 1H), 5.37-5.33 (m, 1H), 3.82 (s, 3H), 2.69-2.63 (m, 1H), 1.44-1.38 (m, 2H), 1.04 (d, *J* = 6.6 Hz, 3H), 0.88 (t, *J* = 7.8 Hz, 3H).

(*E*): <sup>13</sup>C NMR (101 MHz, CDCl<sub>3</sub>) δ 158.61, 134.70, 130.85, 127.45, 127.03, 113.91, 55.31, 38.89, 29.93, 20.34, 11.88.

(*Z*): <sup>13</sup>C NMR (101 MHz, CDCl<sub>3</sub>) δ 158.13, 138.07, 130.65, 129.79, 126.94, 113.56, 55.24, 33.77, 30.42, 20.69, 11.84.

Spectroscopic data are in accordance with that reported in the literature.<sup>19</sup>

#### 1-(hepta-1,6-dien-1-yl)-4-methoxybenzene (**3am**)

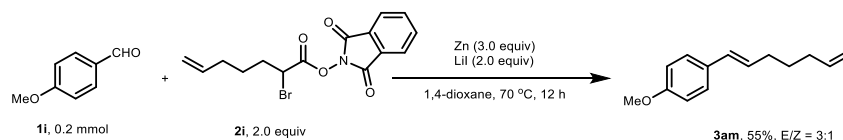

Under the argon atmosphere, 4-methoxybenzaldehyde **1i** (0.2 mmol, 27.2 mg, 1.0 equiv), 1,3-dioxoisindolin-2-yl 2-bromohept-6-enoate **2i** (0.4 mmol, 141.8 mg, 2.0 equiv), Zn power (0.6 mmol, 39.2 mg, 3.0 equiv) and LiI (0.4 mmol, 54.0 mg, 2.0 equiv) were added to a 10 mL Schlenk tube with a magnetic bar. Anhydrous 1,4-dioxane (1.0 mL) was charged and the solution was stirred at 70 °C for 12 h. The reaction mixture



was concentrated under reduced pressure. The residual was purified by column chromatography on silica gel (eluent: petroleum ether/ethyl acetate = 80:1) to afford **3am** as a colorless liquid.

**R<sub>f</sub>** = 0.8 (eluent: petroleum ether/EtOAc = 40:1).

**Yield** 22.3. mg (55%).

**NMR spectroscopy:**

(*E*): <sup>1</sup>H NMR (600 MHz, CDCl<sub>3</sub>) δ 7.30 (d, *J* = 8.4 Hz, 2H), 6.87 (d, *J* = 9.0 Hz, 2H), 6.36 (d, *J* = 16.8 Hz, 1H), 6.14-6.09 (m, 1H), 5.92-5.81 (m, 1H), 5.10-4.96 (m, 2H), 3.83 (s, 3H), 2.24 (q, *J* = 7.2 Hz, 2H), 2.17-2.09 (m, 2H), 1.63-1.55 (m, 2H).

(*Z*): <sup>1</sup>H NMR (600 MHz, CDCl<sub>3</sub>) δ 7.25 (d, *J* = 9.0 Hz, 2H), 6.90 (d, *J* = 8.4 Hz, 2H), 6.39 (d, *J* = 13.2 Hz, 1H), 5.92-5.81 (m, 1H), 5.62-5.57 (m, 1H), 5.10-4.96 (m, 2H), 3.84 (s, 3H), 2.38 (q, *J* = 7.2 Hz, 2H), 2.17-2.09 (m, 2H), 1.63-1.55 (m, 2H).

(*E*): <sup>13</sup>C NMR (101 MHz, CDCl<sub>3</sub>) δ 158.70, 138.75, 129.93, 129.44, 128.53, 127.00, 114.57, 113.95, 55.29, 33.26, 32.41, 28.74.

(*Z*): <sup>13</sup>C NMR (101 MHz, CDCl<sub>3</sub>) δ 158.22, 138.63, 131.14, 130.75, 130.46, 128.47, 114.61, 113.58, 55.25, 33.42, 29.29, 28.08.

**HRMS** (ESI) calcd for (C<sub>14</sub>H<sub>19</sub>O)<sup>+</sup> [M + H]<sup>+</sup>: 203.1430, found: 203.1435.

**(E)-1-methoxy-4-styrylbenzene (3an)**

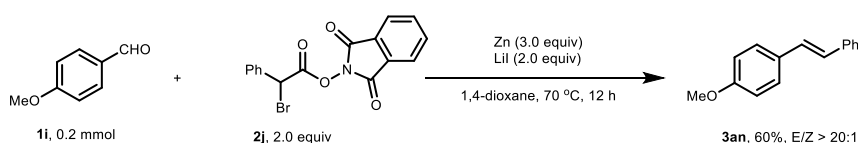

Under the argon atmosphere, 4-methoxybenzaldehyde **1i** (0.2 mmol, 27.2 mg, 1.0 equiv), 1,3-dioxoisindolin-2-yl 2-bromo-2-phenylacetate **2j** (0.4 mmol, 144.1 mg, 2.0 equiv), Zn power (0.6 mmol, 39.2 mg, 3.0 equiv) and LiI (0.4 mmol, 54.0 mg, 2.0 equiv) were added to a 10 mL Schlenk tube with a magnetic bar. Anhydrous 1,4-dioxane (1.0 mL) was charged and the solution was stirred at 70 °C for 12 h. The reaction mixture was concentrated under reduced pressure. The residual was purified by column chromatography on silica gel (eluent: petroleum ether/ethyl acetate = 80:1) to afford **3an** as a colorless liquid.

**R<sub>f</sub>** = 0.8 (eluent: petroleum ether/EtOAc = 40:1).

**Yield** 25.2 mg (60%).

**NMR spectroscopy:**

<sup>1</sup>H NMR (400 MHz, CDCl<sub>3</sub>) δ 7.53-7.43 (m, 4H), 7.36 (t, *J* = 8.0 Hz, 2H), 7.27-7.22 (m, 1H), 7.08 (d, *J* = 16.4 Hz, 1H), 6.99 (d, *J* = 16.4 Hz, 1H), 6.91 (d, *J* = 8.8 Hz, 2H), 3.84 (s, 3H).

<sup>13</sup>C NMR (101 MHz, CDCl<sub>3</sub>) δ 159.36, 137.70, 130.20, 128.65, 128.26, 127.74, 127.22, 126.67, 126.28, 114.18, 55.34.

Spectroscopic data are in accordance with that reported in the literature.<sup>20</sup>

**1-(7-chlorohept-1-en-1-yl)-4-methoxybenzene (3ao)**

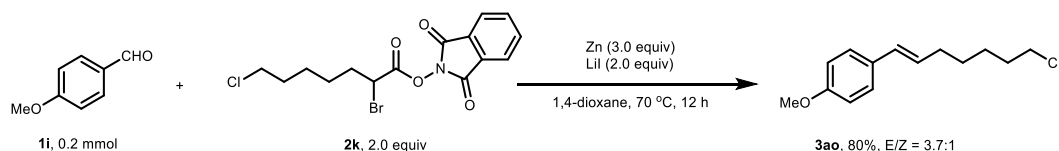

Under the argon atmosphere, 4-methoxybenzaldehyde **1i** (0.2 mmol, 27.2 mg, 1.0 equiv), 1,3-dioxoisindolin-2-yl 2-bromo-7-chloroheptanoate **2k** (0.4 mmol, 155.5 mg, 2.0 equiv), Zn power (0.6 mmol, 39.2 mg, 3.0 equiv) and LiI (0.4 mmol, 54.0 mg, 2.0 equiv) were added to a 10 mL Schlenk tube with a magnetic bar. Anhydrous 1,4-dioxane (1.0 mL) was charged and the solution was stirred at 70 °C for 12 h. The reaction mixture was concentrated under reduced pressure. The residual was purified by column chromatography on silica gel (eluent: petroleum ether/ethyl acetate = 80:1) to afford **3ao** as a colorless liquid.

**R<sub>f</sub>** = 0.8 (eluent: petroleum ether/EtOAc = 40:1).

**Yield** 38.2 mg (80%).

**NMR spectroscopy:**

(*E*): <sup>1</sup>H NMR (400 MHz, CDCl<sub>3</sub>) δ 7.31 (d, *J* = 8.4 Hz, 2H), 6.87 (d, *J* = 8.4 Hz, 2H), 6.42-6.33 (m, 1H), 6.14-6.04 (m, 1H), 3.83 (s, 3H), 3.60-3.51 (m, 2H), 2.28-2.19 (m, 2H), 1.87-1.76 (m, 2H), 1.57-1.47 (p, *J* = 3.6 Hz, 4H).

(*Z*): <sup>1</sup>H NMR (400 MHz, CDCl<sub>3</sub>) δ 7.24 (d, *J* = 8.8 Hz, 2H), 6.90 (d, *J* = 8.8 Hz, 2H), 6.42-6.33 (m, 1H), 5.63-5.55 (m, 1H), 3.84 (s, 3H), 3.60-3.51 (m, 2H), 2.40-2.33 (m, 2H), 1.87-1.76 (m, 2H), 1.57-1.47 (p, *J* = 3.6 Hz, 4H).

$^{13}\text{C}$  NMR (101 MHz,  $\text{CDCl}_3$ )  $\delta$  158.74, 129.93, 129.49, 128.37, 127.02, 113.96, 55.29, 45.04, 32.79, 32.55, 28.78, 26.47.

$^{13}\text{C}$  NMR (101 MHz,  $\text{CDCl}_3$ )  $\delta$  158.26, 131.01, 130.67, 130.39, 128.56, 113.61, 55.26, 45.04, 32.50, 29.27, 28.41, 26.60.

HRMS (ESI) calcd for  $(\text{C}_{14}\text{H}_{20}\text{ClO})^+ [\text{M} + \text{H}]^+$ : 239.1197, found: 239.1193.

### 1-(3-cyclohexylprop-1-en-1-yl)-4-methoxybenzene (**3ap**)

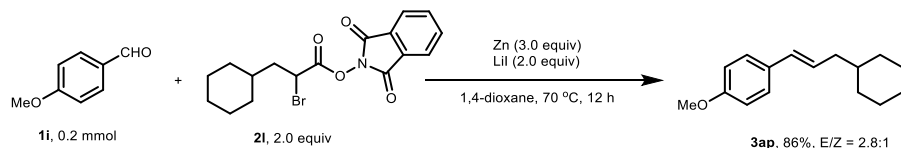

Under the argon atmosphere, 4-methoxybenzaldehyde **1i** (0.2 mmol, 27.2 mg, 1.0 equiv), 1,3-dioxoisindolin-2-yl 2-bromo-3-cyclohexylpropanoate **2i** (0.4 mmol, 152.1 mg, 2.0 equiv), Zn power (0.6 mmol, 39.2 mg, 3.0 equiv) and LiI (0.4 mmol, 54.0 mg, 2.0 equiv) were added to a 10 mL Schlenk tube with a magnetic bar. Anhydrous 1,4-dioxane (1.0 mL) was charged and the solution was stirred at 70 °C for 12 h. The reaction mixture was concentrated under reduced pressure. The residual was purified by column chromatography on silica gel (eluent: petroleum ether/ethyl acetate = 50:1) to afford **3ap** as a colorless liquid.

**R<sub>f</sub>** = 0.8 (eluent: petroleum ether/EtOAc = 40:1).

**Yield** 40.0 mg (86%).

#### NMR spectroscopy:

(*E*):  $^1\text{H}$  NMR (400 MHz,  $\text{CDCl}_3$ )  $\delta$  7.28 (d,  $J$  = 8.8 Hz, 2H), 6.84 (d,  $J$  = 8.8 Hz, 2H), 6.29 (d,  $J$  = 16.0 Hz, 1H), 6.13-6.03 (m, 1H), 3.80 (s, 3H), 2.08 (td,  $J$  = 7.2 Hz, 1.6 Hz, 2H), 1.80-1.61 (m, 6H), 1.41-1.34 (m, 1H), 1.27-1.12 (m, 4H).

(*Z*):  $^1\text{H}$  NMR (400 MHz,  $\text{CDCl}_3$ )  $\delta$  7.23 (d,  $J$  = 8.8 Hz, 2H), 6.87 (d,  $J$  = 8.8 Hz, 2H), 6.37 (d,  $J$  = 11.6 Hz, 1H), 5.64-5.56 (m, 1H), 3.82 (s, 3H), 2.21 (td,  $J$  = 6.8 Hz, 1.6 Hz, 2H), 1.80-1.61 (m, 6H), 1.41-1.34 (m, 1H), 1.27-1.12 (m, 4H).

(*E*):  $^{13}\text{C}$  NMR (101 MHz,  $\text{CDCl}_3$ )  $\delta$  158.63, 130.02, 129.97, 127.59, 126.98, 113.92, 55.30, 41.04, 38.31, 33.22, 26.61, 26.38.

(*Z*):  $^{13}\text{C}$  NMR (101 MHz,  $\text{CDCl}_3$ )  $\delta$  158.12, 130.87, 130.63, 130.35, 128.63, 113.53, 55.23, 38.76, 36.29, 33.27, 26.58, 26.38.

Spectroscopic data are in accordance with that reported in the literature.<sup>21</sup>

### Ethyl -5-(4-methoxyphenyl)pent-4-enoate (**3aq**)

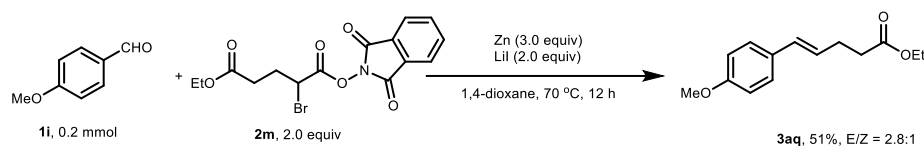

Under the argon atmosphere, 4-methoxybenzaldehyde **1i** (0.2 mmol, 27.2 mg, 1.0 equiv), 1-(1,3-dioxoisindolin-2-yl) 5-ethyl 2-bromopentanedioate **2m** (0.4 mmol, 152.1 mg, 2.0 equiv), Zn power (0.6 mmol, 39.2 mg, 3.0 equiv) and LiI (0.4 mmol, 54.0 mg, 2.0 equiv) were added to a 10 mL Schlenk tube with a magnetic bar. Anhydrous 1,4-dioxane (1.0 mL) was charged and the solution was stirred at 70 °C for 12 h. The reaction mixture was concentrated under reduced pressure. The residual was purified by column chromatography on silica gel (eluent: petroleum ether/ethyl acetate = 80:1) to afford **3aq** as a colorless liquid.

$R_f$  = 0.7 (eluent: petroleum ether/EtOAc = 40:1).

Yield 23.9 mg (51%).

#### NMR spectroscopy:

(*E*): <sup>1</sup>H NMR (600 MHz, CDCl<sub>3</sub>) δ 7.26 (d, *J* = 9.0 Hz, 2H), 6.85 (d, *J* = 9.0 Hz, 2H), 6.37 (d, *J* = 15.6 Hz, 1H), 6.06 (dt, *J* = 16.2 Hz, 6.0 Hz, 1H), 4.18-4.10 (m, 2H), 3.79 (s, 3H), 2.53-2.48 (m, 2H), 2.47-2.41 (m, 2H), 1.27-1.21 (m, 3H).

(*Z*): <sup>1</sup>H NMR (600 MHz, CDCl<sub>3</sub>) δ 7.22 (d, *J* = 9.0 Hz, 2H), 6.87 (d, *J* = 9.0 Hz, 2H), 6.39 (d, *J* = 10.8 Hz, 1H), 6.55-6.49 (m, 1H), 4.18-4.10 (m, 2H), 3.81 (s, 3H), 2.67-2.62 (m, 2H), 2.47-2.41 (m, 2H), 1.27-1.21 (m, 3H).

(*E*): <sup>13</sup>C NMR (101 MHz, CDCl<sub>3</sub>) δ 173.10, 158.87, 130.30, 129.95, 127.16, 126.32, 113.93, 60.38, 55.29, 34.25, 28.33, 14.28.

(*Z*): <sup>13</sup>C NMR (101 MHz, CDCl<sub>3</sub>) δ 173.10, 158.38, 130.24, 129.53, 128.82, 126.32, 113.66, 60.38, 55.29, 34.51, 24.10, 14.24.

Spectroscopic data are in accordance with that reported in the literature.<sup>22</sup>

### 1-chloro-4-(3-(4-methoxyphenyl)allyl)benzene (**3ar**)

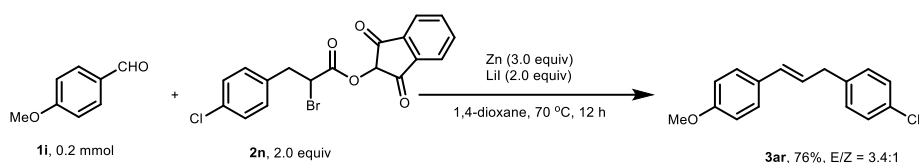

Under the argon atmosphere, 4-methoxybenzaldehyde **1i** (0.2 mmol, 27.2 mg, 1.0 equiv), 1,3-dioxo-2,3-dihydro-1H-inden-2-yl 2-bromo-3-(4-chlorophenyl)propanoate **2n** (0.4 mmol, 163.1 mg, 2.0 equiv), Zn power (0.6 mmol, 39.2 mg, 3.0 equiv) and LiI (0.4 mmol, 54.0 mg, 2.0 equiv) were added to a 10 mL Schlenk tube with a magnetic bar. Anhydrous 1,4-dioxane (1.0 mL) was charged and the solution was stirred at 70 °C for 12 h. The reaction mixture was concentrated under reduced pressure. The residual was purified by column chromatography on silica gel (eluent: petroleum ether/ethyl acetate = 50:1) to afford **3ar** resulting in 76% yield (39.3 mg) as a colorless liquid.

**R<sub>f</sub>** = 0.8 (eluent: petroleum ether/EtOAc = 40:1).

**Yield** 39.3 mg (76%).

#### NMR spectroscopy:

(*E*): <sup>1</sup>H NMR (600 MHz, CDCl<sub>3</sub>) δ 7.43 (d, *J* = 8.4 Hz, 2H), 7.29 (d, *J* = 9.0 Hz, 2H), 7.13-7.09 (m, 2H), 6.85 (d, *J* = 9.0 Hz, 2H), 6.39 (d, *J* = 16.2 Hz, 1H), 6.20-6.13 (m, 1H), 3.81 (s, 3H), 3.48 (d, *J* = 6.6 Hz, 2H).

(*Z*): <sup>1</sup>H NMR (600 MHz, CDCl<sub>3</sub>) δ 7.43 (d, *J* = 8.4 Hz, 2H), 7.25 (d, *J* = 8.4 Hz, 2H), 7.13-7.09 (m, 2H), 6.89 (d, *J* = 8.4 Hz, 2H), 6.55 (d, *J* = 10.8 Hz, 1H), 5.75-5.69 (m, 1H), 3.82 (s, 3H), 3.62 (d, *J* = 7.8 Hz, 2H).

(*E*): <sup>13</sup>C NMR (101 MHz, CDCl<sub>3</sub>) δ 159.00, 139.44, 131.51, 130.94, 130.45, 127.29, 126.27, 119.93, 113.99, 55.32, 38.69.

(*Z*): <sup>13</sup>C NMR (101 MHz, CDCl<sub>3</sub>) δ 158.59, 139.95, 131.55, 130.12, 130.08, 130.00, 129.91, 128.35, 119.83, 113.76, 55.29, 34.07.

Spectroscopic data are in accordance with that reported in the literature.<sup>23</sup>

#### 1-(cyclobutylidenemethyl)-4-methoxybenzene (3as)

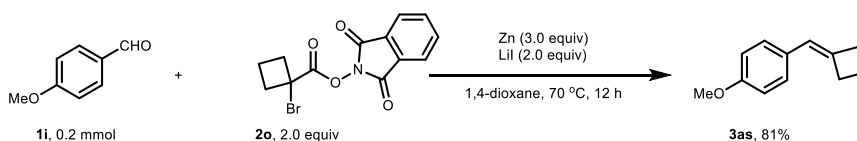

Under the argon atmosphere, 4-methoxybenzaldehyde **1i** (0.2 mmol, 27.2 mg, 1.0

equiv), 1,3-dioxoisindolin-2-yl 1-bromocyclobutane-1-carboxylate **2o** (0.4 mmol, 129.6 mg, 2.0 equiv), Zn power (0.6 mmol, 39.2 mg, 3.0 equiv) and LiI (0.4 mmol, 54.0 mg, 2.0 equiv) were added to a 10 mL Schlenk tube with a magnetic bar. Anhydrous 1,4-dioxane (1.0 mL) was charged and the solution was stirred at 70 °C for 12 h. The reaction mixture was concentrated under reduced pressure. The residual was purified by column chromatography on silica gel (eluent: petroleum ether/ethyl acetate = 80:1) to afford **3as** as a colorless liquid.

**R<sub>f</sub>** = 0.8 (eluent: petroleum ether/EtOAc = 40:1).

**Yield** 28.0 mg (81%).

#### NMR spectroscopy:

<sup>1</sup>H NMR (400 MHz, CDCl<sub>3</sub>) δ 7.15 (d, *J* = 8.4 Hz, 2H), 6.85 (d, *J* = 8.8 Hz, 2H), 6.03 (s, 1H), 3.80 (s, 3H), 3.03 (t, *J* = 7.6 Hz, 2H), 2.87 (t, *J* = 8.4 Hz, 2H), 2.16-2.04 (m, 2H).

<sup>13</sup>C NMR (101 MHz, CDCl<sub>3</sub>) δ 157.67, 142.17, 130.95, 128.17, 120.19, 113.82, 55.26, 32.56, 32.50, 18.32.

Spectroscopic data are in accordance with that reported in the literature.<sup>24</sup>

#### 4-(2-methylprop-1-en-1-yl)-1,1'-biphenyl (**3at**)

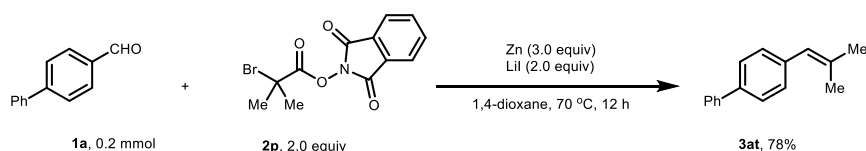

Under the argon atmosphere, 4-Biphenylcarboxaldehyde **1a** (0.2 mmol, 27.2 mg, 1.0 equiv), 1,3-dioxoisindolin-2-yl 2-bromo-2-methylpropanoate **2p** (0.4 mmol, 124.8 mg, 2.0 equiv), Zn power (0.6 mmol, 39.2 mg, 3.0 equiv) and LiI (0.4 mmol, 54.0 mg, 2.0 equiv) were added to a 10 mL Schlenk tube with a magnetic bar. Anhydrous 1,4-dioxane (1.0 mL) was charged and the solution was stirred at 70 °C for 12 h. The reaction mixture was concentrated under reduced pressure. The residual was purified by column chromatography on silica gel (eluent: petroleum ether/ethyl acetate = 100:1) to afford **3at** as a colorless liquid.

**R<sub>f</sub>** = 0.8 (eluent: petroleum ether/EtOAc = 50:1).

**Yield** 32.5 mg (78%).

### NMR spectroscopy:

$^1\text{H}$  NMR (400 MHz,  $\text{CDCl}_3$ )  $\delta$  7.62 (d,  $J$  = 7.6 Hz, 2H), 7.57 (d,  $J$  = 8.4 Hz, 2H), 7.44 (t,  $J$  = 7.6 Hz, 2H), 7.37-7.28 (m, 3H), 6.31 (s, 1H), 1.94 (d,  $J$  = 5.6 Hz, 6H).

$^{13}\text{C}$  NMR (101 MHz,  $\text{CDCl}_3$ )  $\delta$  141.02, 138.53, 137.79, 135.81, 129.13, 128.74, 127.07, 126.96, 126.74, 124.76, 27.00, 19.54.

Spectroscopic data are in accordance with that reported in the literature.<sup>25</sup>

### 1-(2-ethylpent-1-en-1-yl)-4-methoxybenzene (**3au**)

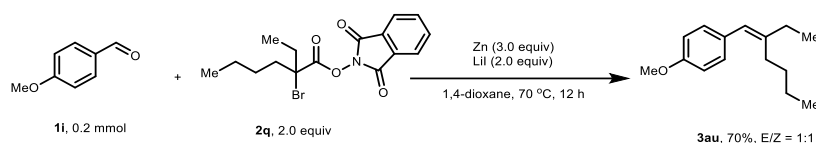

Under the argon atmosphere, 4-methoxybenzaldehyde **1i** (0.2 mmol, 27.2 mg, 1.0 equiv), 1,3-dioxoisindolin-2-yl 2-bromo-2-ethylhexanoate **2q** (0.4 mmol, 147.3 mg, 2.0 equiv), Zn power (0.6 mmol, 39.2 mg, 3.0 equiv) and LiI (0.4 mmol, 54.0 mg, 2.0 equiv) were added to a 10 mL Schlenk tube with a magnetic bar. Anhydrous 1,4-dioxane (1.0 mL) was charged and the solution was stirred at 70 °C for 12 h. The reaction mixture was concentrated under reduced pressure. The residual was purified by column chromatography on silica gel (eluent: petroleum ether/ethyl acetate = 80:1) to afford **3au** as a colorless liquid.

**R<sub>f</sub>** = 0.8 (eluent: petroleum ether/EtOAc = 40:1).

**Yield** 30.5 mg (70%).

### NMR spectroscopy:

(*E* and *Z*):  $^1\text{H}$  NMR (400 MHz,  $\text{CDCl}_3$ )  $\delta$  7.14 (dd,  $J$  = 8.8, 3.2 Hz, 2H), 6.85 (d,  $J$  = 8.4 Hz, 2H), 6.18 (s, 1H), 3.80 (s, 3H), 2.27-2.12 (m, 4H), 1.51-1.41 (m, 2H), 1.39-1.30 (m, 2H), 1.08 (dt,  $J$  = 12.8 Hz, 7.6 Hz, 3H), 0.91 (dt,  $J$  = 19.2 Hz, 7.2 Hz, 3H).

(*E* and *Z*):  $^{13}\text{C}$  NMR (101 MHz,  $\text{CDCl}_3$ )  $\delta$  157.72, 157.68, 144.08, 143.83, 131.39, 131.32, 129.69, 129.65, 123.69, 123.04, 113.51, 113.48, 55.23, 36.53, 30.58, 30.52, 30.45, 30.01, 23.59, 22.95, 22.59, 14.06, 13.99, 13.05, 12.90.

**HRMS** (APCI) calcd for  $(\text{C}_{15}\text{H}_{23}\text{O})^+ [\text{M} + \text{H}]^+$ : 219.1743, found: 219.1743.

### 1-(2,2-dibromovinyl)-4-methoxybenzene (3av)

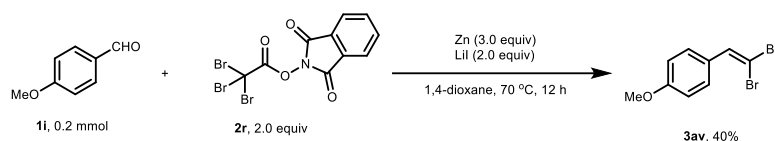

Under the argon atmosphere, 4-methoxybenzaldehyde **1i** (0.2 mmol, 27.2 mg, 1.0 equiv), 1,3-dioxoisindolin-2-yl 2,2,2-tribromoacetate **2r** (0.4 mmol, 176.4 mg, 2.0 equiv), Zn power (0.6 mmol, 39.2 mg, 3.0 equiv) and LiI (0.4 mmol, 54.0 mg, 2.0 equiv) were added to a 10 mL Schlenk tube with a magnetic bar. Anhydrous 1,4-dioxane (1.0 mL) was charged and the solution was stirred at 70 °C for 12 h. The reaction mixture was concentrated under reduced pressure. The residual was purified by column chromatography on silica gel (eluent: petroleum ether/ethyl acetate = 80:1) to afford **3av** as a yellow solid.

**R<sub>f</sub>** = 0.8 (eluent: petroleum ether/EtOAc = 40:1).

**Yield** 23.0 mg (40%).

#### NMR spectroscopy:

<sup>1</sup>H NMR (400 MHz, CDCl<sub>3</sub>) δ 7.54 (d, *J* = 8.8 Hz, 2H), 7.43 (s, 1H), 6.92 (d, *J* = 9.6 Hz, 2H), 3.85 (s, 3H).

<sup>13</sup>C NMR (101 MHz, CDCl<sub>3</sub>) δ 159.68, 136.32, 129.90, 127.83, 113.81, 87.30, 55.31.

Spectroscopic data are in accordance with that reported in the literature.<sup>26</sup>

### 1-(2,2-dibromovinyl)-4-methoxybenzene (3aw)

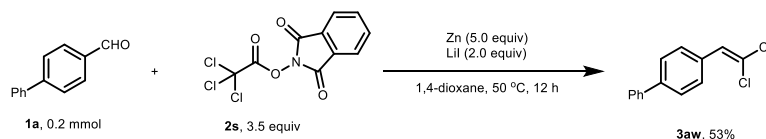

Under the argon atmosphere, 4-methoxybenzaldehyde **1a** (0.2 mmol, 36.4 mg, 1.0 equiv), 1,3-dioxoisindolin-2-yl 2,2,2-tribromoacetate **2s** (0.7 mmol, 216.0 mg, 3.5 equiv), Zn power (1.0 mmol, 65.0 mg, 5.0 equiv) and LiI (0.4 mmol, 54.0 mg, 2.0 equiv) were added to a 10 mL Schlenk tube with a magnetic bar. Anhydrous 1,4-dioxane (1.0 mL) was charged and the solution was stirred at 50 °C for 12 h. The reaction mixture was concentrated under reduced pressure. The residual was purified by column chromatography on silica gel (eluent: petroleum ether/ethyl acetate = 50:1) to afford



**3aw** as a white solid.

**R<sub>f</sub>** = 0.8 (eluent: petroleum ether/EtOAc = 40:1).

**Yield** 26.0 mg (53%).

**NMR spectroscopy:**

<sup>1</sup>H NMR (400 MHz, CDCl<sub>3</sub>) δ 7.64-7.58 (m, 6H), 7.48-7.42 (m, 2H), 7.37 (tt, *J* = 7.2 Hz, 2.0 Hz, 1H), 6.90 (s, 1H).

<sup>13</sup>C NMR (151 MHz, CDCl<sub>3</sub>) δ 141.22, 140.31, 132.37, 129.09, 128.87, 128.23, 127.66, 127.11, 127.03, 120.99.

Spectroscopic data are in accordance with that reported in the literature.<sup>27</sup>

### The chemoselectivity of this decarboxylative olefination.

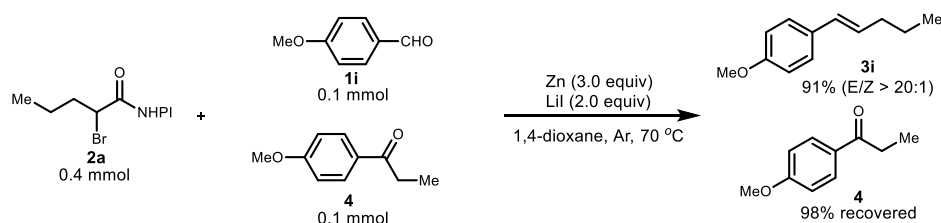

Under the argon atmosphere, 4-methoxybenzaldehyde **1i** (0.1 mmol, 13.6 mg, 1.0 equiv), 1-(4-methoxyphenyl)propan-1-one **4** (0.1 mmol, 16.4 mg, 1.0 equiv) 1,3-dioxoisindolin-2-yl 2-bromopentanoate **2a** (0.4 mmol, 131.0 mg, 2.0 equiv), Zn power (0.6 mmol, 39.2 mg, 3.0 equiv) and LiI (0.4 mmol, 54.0 mg, 2.0 equiv) were added to a 10 mL Schlenk tube with a magnetic bar. Anhydrous 1,4-dioxane (1.0 mL) was charged and the solution was stirred at 70 °C for 12 h. The reaction mixture was concentrated under reduced pressure. The residual was purified by column chromatography on silica gel (eluent: petroleum ether/ethyl acetate = 100:1) to afford **3i** resulting in 91% yield (16.0 mg) as a colorless liquid and the **4** was recovered (15.0 mg, 98%) as a colorless liquid.

### 1-(2-ethylpent-1-en-1-yl)-4-methoxybenzene (**3ax**)

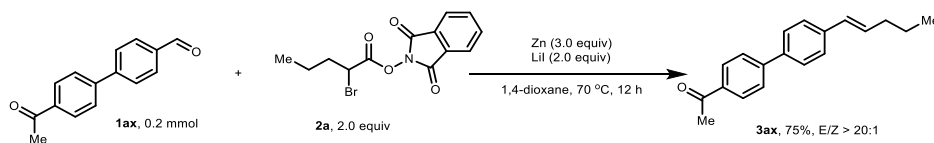

Under the argon atmosphere, 4'-acetyl-[1,1'-biphenyl]-4-carbaldehyde **1ax** (0.2

mmol, 44.8 mg, 1.0 equiv), 1,3-dioxoisindolin-2-yl 2-bromo-2-ethylhexanoate **2a** (0.4 mmol, 130.5 mg, 2.0 equiv), Zn power (0.6 mmol, 39.2 mg, 3.0 equiv) and LiI (0.4 mmol, 54.0 mg, 2.0 equiv) were added to a 10 mL Schlenk tube with a magnetic bar. Anhydrous 1,4-dioxane (1.0 mL) was charged and the solution was stirred at 70 °C for 12 h. The reaction mixture was concentrated under reduced pressure. The residual was purified by column chromatography on silica gel (eluent: petroleum ether/ethyl acetate = 100:1) to afford **3ax** as a white solid.

**R<sub>f</sub>** = 0.8 (eluent: petroleum ether/EtOAc = 50:1).

**Yield** 40.0 mg (75%).

#### NMR spectroscopy:

(*E*): <sup>1</sup>H NMR (400 MHz, CDCl<sub>3</sub>) δ 8.04-7.99 (m, 2H), 7.71-7.66 (m, 2H), 7.60-7.55 (m, 2H), 7.47-7.41 (m, 2H), 6.43 (d, *J* = 16.0 Hz, 1H), 6.35-6.26 (m, 1H), 2.63 (s, 3H), 2.23 (q, *J* = 7.9, 7.5 Hz, 2H), 1.53 (m, 2H), 0.98 (t, *J* = 7.2 Hz, 3H).

(*E*): <sup>13</sup>C NMR (151 MHz, CDCl<sub>3</sub>) δ 197.68, 145.43, 138.07, 138.05, 135.74, 131.96, 129.28, 128.93, 127.32, 126.88, 126.50, 35.20, 26.61, 22.51, 13.73.

**HRMS** (APCI) calcd for (C<sub>19</sub>H<sub>21</sub>O)<sup>+</sup> [M + H]<sup>+</sup>: 265.1587, found: 265.1587.

### 3. Scaled-up reaction

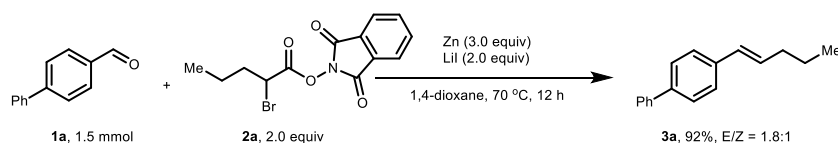

Under the argon atmosphere, 4-biphenylcarboxaldehyde **1a** (1.5 mmol, 274.0 mg, 1.0 equiv), 1,3-dioxoisindolin-2-yl 2-bromopentanoate **2a** (3.0 mmol, 978.0 mg, 2.0 equiv), Zn power (4.5 mmol, 292.5 mg, 3.0 equiv) and LiI (4.0 mmol, 540.0 mg, 2.0 equiv) were added to a 10 mL Schlenk tube with a magnetic bar. Anhydrous 1,4-dioxane (15.0 mL) was charged and the solution was stirred at 70 °C for 12 h. The reaction mixture was concentrated under reduced pressure. The residual was purified by column chromatography on silica gel (eluent: petroleum ether/ethyl acetate = 100:1) to afford **3a** (307.0 mg) in 92 % yield as a white solid.

## 4. Mechanistic studies

### 4.1 The detection of phthalimide and CO<sub>2</sub>

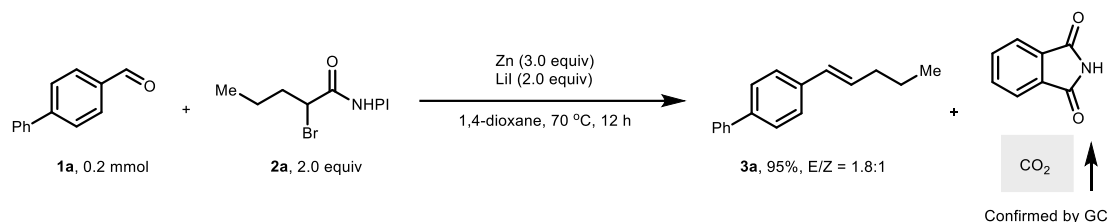

Under the argon atmosphere, 4-biphenylcarboxaldehyde **1a** (0.2 mmol, 36.4 mg, 1.0 equiv), 1,3-dioxoisindolin-2-yl 2-bromopentanoate **2a** (0.4 mmol, 131.0 mg, 2.0 equiv), Zn power (0.6 mmol, 39.2 mg, 3.0 equiv) and LiI (0.4 mmol, 54.0 mg, 2.0 equiv) were added to a 10 mL Schlenk tube with a magnetic bar. Anhydrous 1,4-dioxane (1.0 mL) was charged and the solution was stirred at 70 °C for 12 h. Then, the reaction mixture was analyzed by GC-MS. The molecular weight of the by-products of phthalimide and CO<sub>2</sub> were detected by GC-MS.

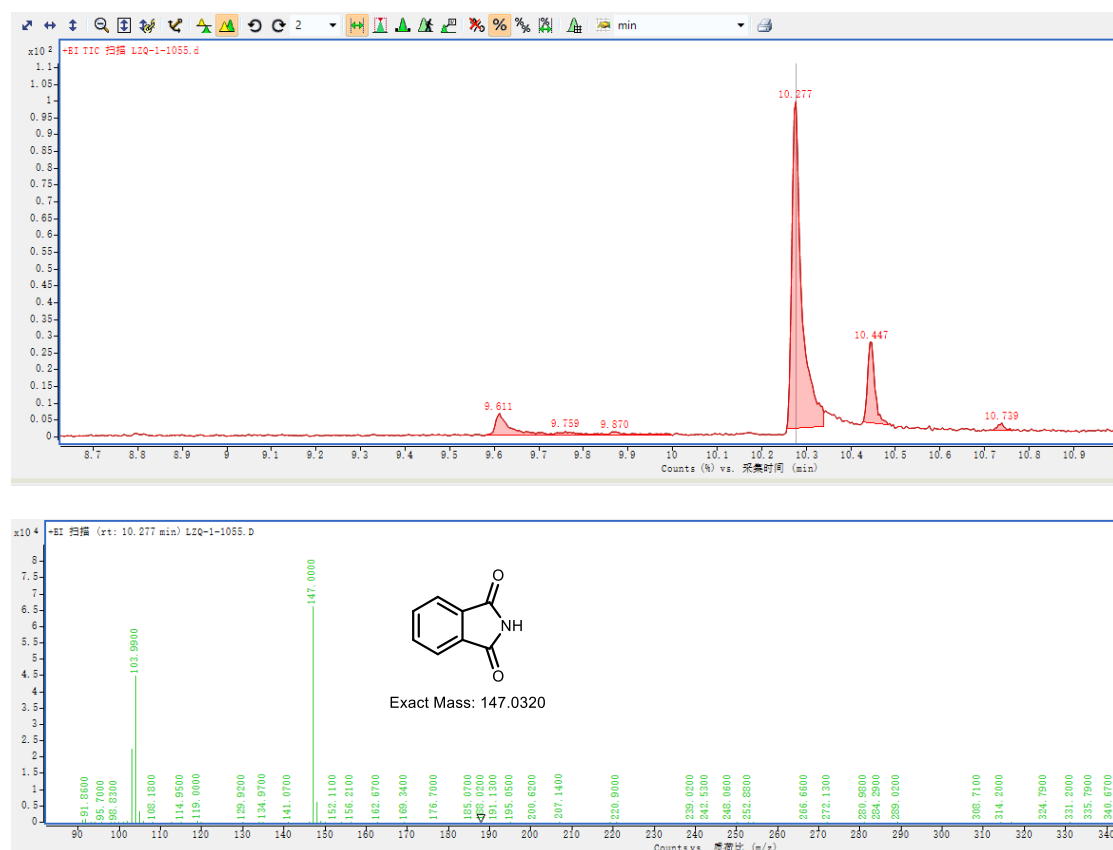

Figure S1. GC-MS of the reaction mixtures for by-product phthalimide

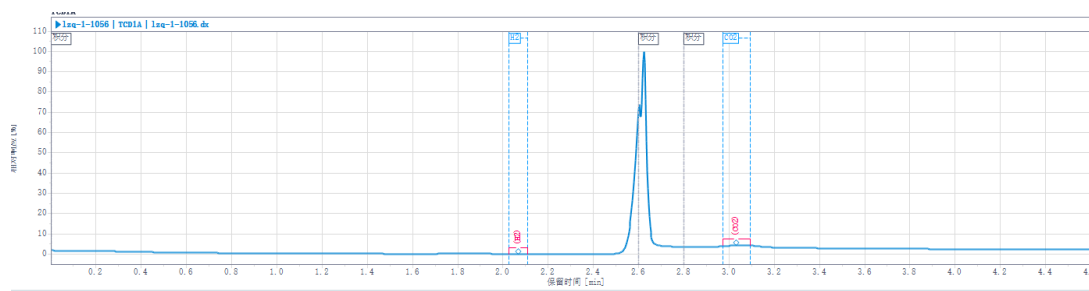

**Figure S2.** Blank control experiment

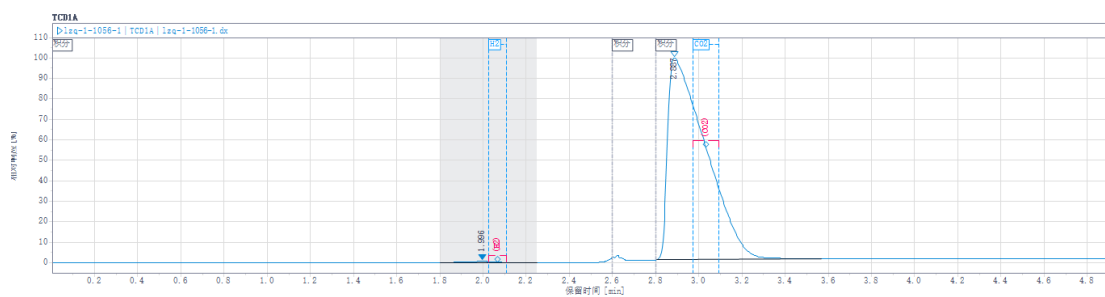

**Figure S3.** The CO<sub>2</sub> detection of the reaction

#### 4.2 Control reaction to rule out the potential carbenoid intermediate

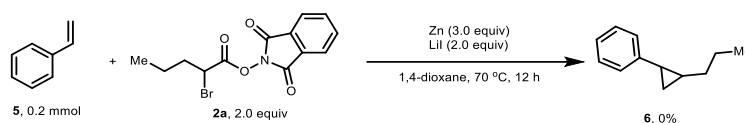

Under the argon atmosphere, styrene **5** (0.2 mmol, 23.0  $\mu$ L, 1.0 equiv), 1,3-dioxoisindolin-2-yl 2-bromopentanoate **2a** (0.4 mmol, 131.5 mg, 2.0 equiv), Zn power (1.0 mmol, 39.2 mg, 3.0 equiv) and LiI (0.4 mmol, 54.0 mg, 2.0 equiv) were added to a 10 mL Schlenk tube with a magnetic bar. Anhydrous 1,4-dioxane (1.0 mL) was charged and the solution was stirred at 70 °C for 12 h. The reaction mixture was detected by TLC and GC-MS. The (2-propylcyclopropyl)benzene **6** was not observed.

#### 4.3 Control experiment with 4-bromobut-2-enoic acid-derived NHPI ester

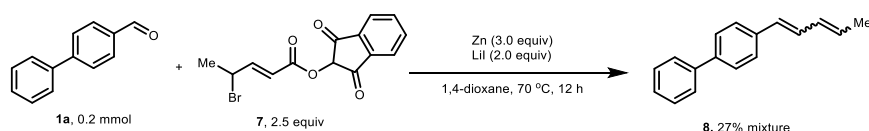

Under the argon atmosphere, 4-phenylbenzaldehyde **1a** (0.2 mmol, 36.4 mg, 1.0 equiv), 1,3-dioxo-2,3-dihydro-1H-inden-2-yl (E)-4-bromopent-2-enoate **7** (0.5 mmol, 161.5 mg, 2.5 equiv), Zn power (0.6 mmol, 39.2 mg, 3.0 equiv) and LiI (0.4 mmol, 54.0

mg, 2.0 equiv) were added to a 10 mL Schlenk tube with a magnetic bar. Anhydrous 1,4-dioxane (1.0 mL) was charged and the solution was stirred at 70 °C for 12 h. The reaction mixture was concentrated under reduced pressure. The residual was purified by column chromatography on silica gel (eluent: petroleum ether/ethyl acetate = 100:1) to afford **8** resulting in 27% yield (12.0 mg) as a white solid.

**R<sub>f</sub>** = 0.8 (eluent: petroleum ether/EtOAc = 50:1).

**Yield** 12.0 mg (27%).

#### NMR spectroscopy:

<sup>1</sup>H NMR (400 MHz, CDCl<sub>3</sub>) δ 7.64-7.57 (m, 2H), 7.56-7.48 (m, 2H), 7.47-7.39 (m, 4H), 7.37-7.30 (m, 1H), 7.18-7.08 (m, 0.22H), 6.80 (dd, *J* = 16.0 Hz, 10.4 Hz, 0.86H), 6.56 (d, *J* = 15.6 Hz, 0.19H) 6.47 (d, *J* = 16.0 Hz, 0.86H), 6.30-6.17 (m, 1H), 5.91-5.81 (m, 0.86H), 5.67-5.57 (m, 0.2H), 1.84 (dd, *J* = 6.8 Hz, 1.6 Hz, 3H).

<sup>13</sup>C NMR (151 MHz, CDCl<sub>3</sub>) δ 140.79, 139.79, 136.79, 131.94, 131.40, 130.44, 129.68, 129.48, 129.27, 128.76, 127.26, 127.23, 127.20, 126.89, 126.87, 126.74, 126.54, 18.35.

**HRMS** (APCI) calcd for (C<sub>17</sub>H<sub>17</sub>)<sup>+</sup> [*M* + *H*]<sup>+</sup>: 221.1325, found: 221.1327.

#### 4.4 Relation between the stereochemistry

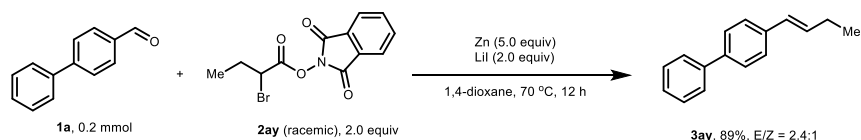

Under the argon atmosphere, 4-phenylbenzaldehyde **1a** (0.2 mmol, 36.4 mg, 1.0 equiv), 1,3-dioxoisindolin-2-yl 2-bromobutanoate **2ay** (0.4 mmol, 125.0 mg, 2.0 equiv), Zn power (0.6 mmol, 39.2 mg, 3.0 equiv) and LiI (0.4 mmol, 54.0 mg, 2.0 equiv) were added to a 10 mL Schlenk tube with a magnetic bar. Anhydrous 1,4-dioxane (1.0 mL) was charged and the solution was stirred at 70 °C for 12 h. The reaction mixture was concentrated under reduced pressure. The residual was purified by column chromatography on silica gel (eluent: petroleum ether/ethyl acetate = 100:1) to afford 4-(but-1-en-1-yl)-1,1'-biphenyl **3ay** as a colorless liquid.

**R<sub>f</sub>** = 0.8 (eluent: petroleum ether/EtOAc = 50:1).

**Yield** 37.0 mg (89%).

### NMR spectroscopy:

(*E*):  $^1\text{H}$  NMR (400 MHz,  $\text{CDCl}_3$ )  $\delta$  7.63-7.51 (m, 4H), 7.47-7.39(m, 3H), 7.39-7.30 (m, 2H), 6.43 (d,  $J = 15.2$  Hz, 1H), 6.37-6.27 (m, 1H), 2.31-2.22 (m, 2H), 1.15-1.07 (m, 3H).

(*Z*):  $^1\text{H}$  NMR (400 MHz,  $\text{CDCl}_3$ )  $\delta$  7.63-7.51 (m, 4H), 7.47-7.39(m, 3H), 7.39-7.30 (m, 2H), 6.43 (d,  $J = 15.2$  Hz, 1H), 5.74-5.63 (m, 1H), 2.46-2.36 (m, 2H), 1.15-1.07 (m, 3H).

(*E*):  $^{13}\text{C}$  NMR (151 MHz,  $\text{CDCl}_3$ )  $\delta$  140.91, 139.53, 137.06, 132.87, 129.19, 128.74, 128.39, 127.18, 126.89, 126.33, 26.13, 13.66.

(*Z*):  $^{13}\text{C}$  NMR (151 MHz,  $\text{CDCl}_3$ )  $\delta$  140.91, 139.24, 136.85, 135.01, 129.19, 128.77, 127.85, 127.13, 126.99, 126.82, 22.12, 14.48.

Spectroscopic data are in accordance with that reported in the literature.<sup>28</sup>

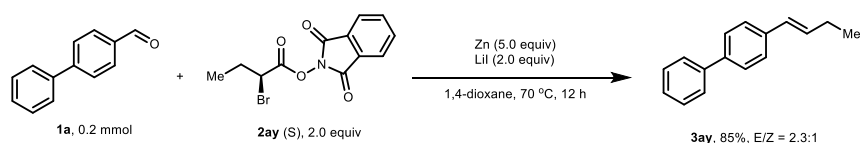

Under the argon atmosphere, 4-phenylbenzaldehyde **1a** (0.2 mmol, 36.4 mg, 1.0 equiv), 1,3-dioxoisindolin-2-yl (*S*)-2-bromobutanoate **2ay** (0.4 mmol, 125.0 mg, 2.0 equiv), Zn power (0.6 mmol, 39.2 mg, 3.0 equiv) and LiI (0.4 mmol, 54.0 mg, 2.0 equiv) were added to a 10 mL Schlenk tube with a magnetic bar. Anhydrous 1,4-dioxane (1.0 mL) was charged and the solution was stirred at 70 °C for 12 h. The reaction mixture was concentrated under reduced pressure. The residual was purified by column chromatography on silica gel (eluent: petroleum ether/ethyl acetate = 100:1) to afford **3ay** resulting in 85% yield (35.0 mg) as a colorless liquid.

### 4.5 Control reactions for the nucleophilic addition step

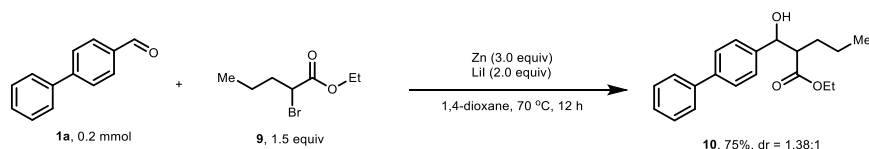

Under the argon atmosphere, 4-phenylbenzaldehyde **1a** (0.2 mmol, 36.4 mg, 1.0

equiv), ethyl 2-bromopentanoate **9** (0.3 mmol, 62.7 mg, 1.5 equiv), Zn power (0.6 mmol, 39.2 mg, 3.0 equiv) and LiI (0.4 mmol, 54.0 mg, 2.0 equiv) were added to a 10 mL Schlenk tube with a magnetic bar. Anhydrous 1,4-dioxane (1.0 mL) was charged and the solution was stirred at 70 °C for 12 h. The reaction mixture was concentrated under reduced pressure. The residual was purified by column chromatography on silica gel (eluent: petroleum ether/ethyl acetate = 4:1) to afford **10** (dr = 1.38:1) as a white solid.  $R_f = 0.4$  (eluent: petroleum ether/EtOAc = 5:1).

**Yield** 46.5 mg (75%).

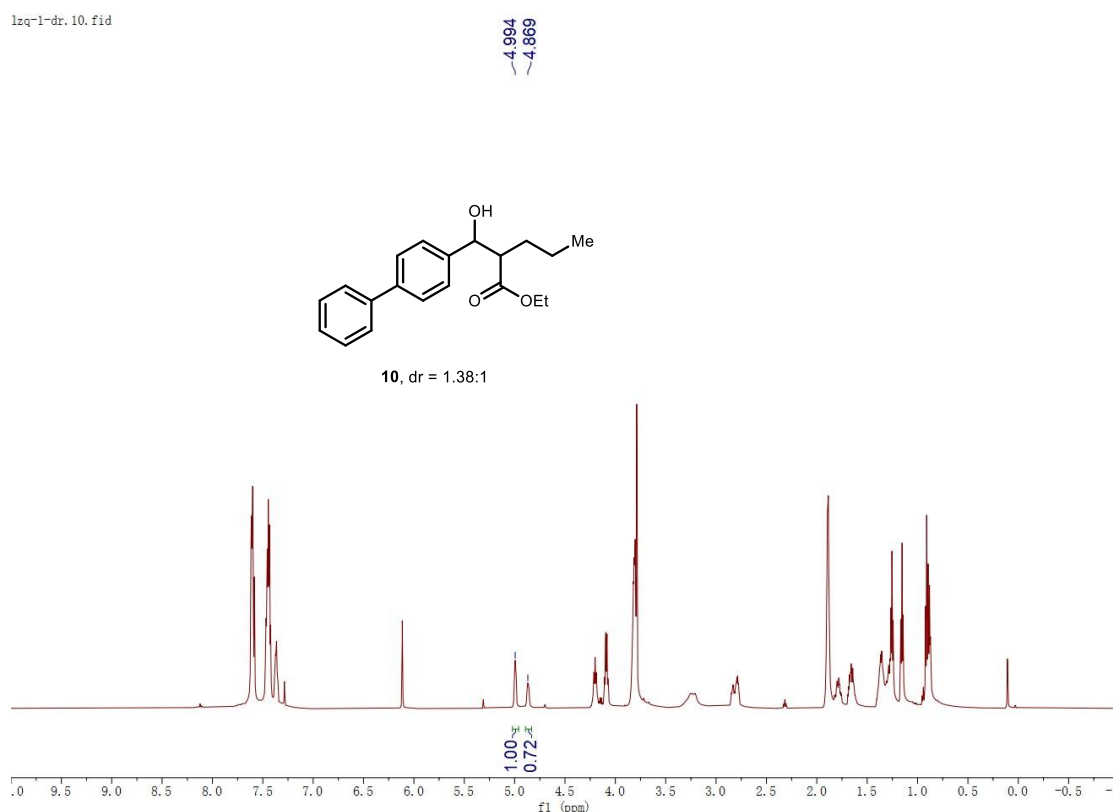

**Figure S4.**  $^1\text{H}$  NMR of **10** (reaction mixture,  $\text{CDCl}_3$ , 400 MHz).

#### NMR spectroscopy:

$^1\text{H}$  NMR (400 MHz,  $\text{CDCl}_3$ )  $\delta$  7.58 (t,  $J = 8.0$  Hz, 4H), 7.42 (d,  $J = 8.0$  Hz, 4H), 7.34 (t,  $J = 7.2$  Hz, 1H), 4.98 (dd,  $J = 5.6$  Hz, 2.8 Hz, 1H), 4.08 (q,  $J = 7.2$  Hz, 2H), 2.86 (d,  $J = 3.2$  Hz, 1H), 2.79-2.70 (m, 1H), 1.82-1.70 (m, 1H), 1.67-1.56 (m, 1H), 1.35-1.25 (m, 2H), 1.15 (t,  $J = 7.2$  Hz, 3H), 0.88 (t,  $J = 7.6$  Hz, 3H).

$^{13}\text{C}$  NMR (151 MHz,  $\text{CDCl}_3$ )  $\delta$  175.15, 140.80, 140.69, 140.55, 128.77, 127.30, 127.05, 126.99, 126.67, 74.07, 60.53, 52.76, 29.21, 20.81, 14.11, 13.96.

HRMS (ESI) calcd for (C<sub>20</sub>H<sub>25</sub>O<sub>3</sub>)<sup>+</sup> [M + H]<sup>+</sup>: 313.1798, found: 313.1803.

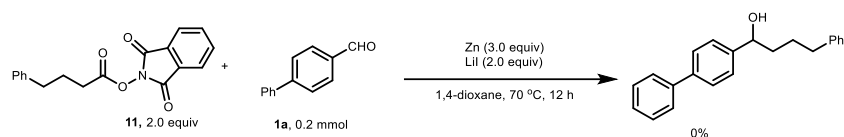

Under the argon atmosphere, 4-phenylbenzaldehyde **1a** (0.2 mmol, 36.4 mg, 1.0 equiv), 1,3-dioxoisindolin-2-yl 4-phenylbutanoate **11** (0.4 mmol, 123.7 mg, 2.0 equiv), Zn power (0.6 mmol, 39.2 mg, 3.0 equiv) and LiI (0.4 mmol, 54.0 mg, 2.0 equiv) were added to a 10 mL Schlenk tube with a magnetic bar. Anhydrous 1,4-dioxane (1.0 mL) was charged and the solution was stirred at 70 °C for 12 h. The reaction mixture was detected by TLC and GC-MS. The 1-([1,1'-biphenyl]-4-yl)-4-phenylbutan-1-ol was not observed.

#### 4.6 Control reactions for the elimination step

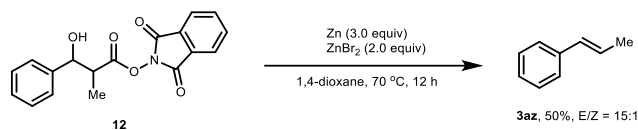

Under the argon atmosphere, 1,3-dioxoisindolin-2-yl 3-hydroxy-2-methyl-3-phenylpropanoate **12** (0.2 mmol, 65.0 mg, 1.0 equiv), Zn power (0.6 mmol, 39.2 mg, 3.0 equiv) and ZnBr<sub>2</sub> (0.4 mmol, 90.4 mg, 2.0 equiv) were added to a 10 mL Schlenk tube with a magnetic bar. Anhydrous 1,4-dioxane (1.0 mL) was charged and the solution was stirred at 70 °C for 12 h. The reaction mixture was concentrated under reduced pressure. The residual was purified by column chromatography on silica gel (eluent: petroleum ether/ethyl acetate = 50:1) to afford **3az** resulting in 50% yield (11.8 mg) as a colorless liquid.

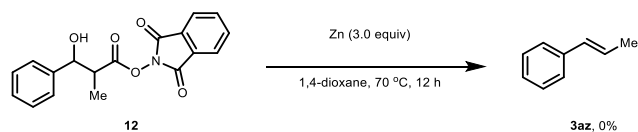

Under the argon atmosphere, 1,3-dioxoisindolin-2-yl 3-hydroxy-2-methyl-3-phenylpropanoate **12** (0.2 mmol, 65.0 mg, 1.0 equiv) and Zn power (0.6 mmol, 39.2



mg, 3.0 equiv) were added to a 10 mL Schlenk tube with a magnetic bar. Anhydrous 1,4-dioxane (1.0 mL) was charged and the solution was stirred at 70 °C for 12 h. The reaction mixture was detected by TLC and GC-MS. The **3az** was not observed.

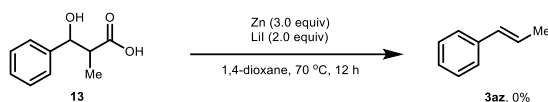

Under the argon atmosphere, 3-hydroxy-2-methyl-3-phenylpropanoic acid **13** (0.2 mmol, 36.1 mg, 1.0 equiv), Zn power (0.6 mmol, 39.2 mg, 3.0 equiv) and LiI (0.4 mmol, 54.0 mg, 2.0 equiv) were added to a 10 mL Schlenk tube with a magnetic bar. Anhydrous 1,4-dioxane (1.0 mL) was charged and the solution was stirred at 70 °C for 12 h. The reaction mixture was detected by TLC and GC-MS. The **3az** was not observed.

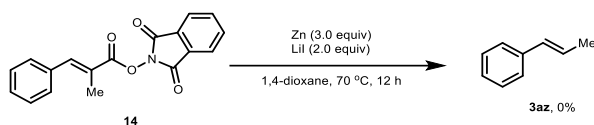

Under the argon atmosphere, 1,3-dioxoisindolin-2-yl 1,3-dioxoisindolin-2-yl (E)-2-methyl-3-phenylacrylate (0.2 mmol, 61.4 mg, 1.0 equiv), Zn power (0.6 mmol, 39.2 mg, 3.0 equiv) and LiI (0.4 mmol, 54.0 mg, 2.0 equiv) were added to a 10 mL Schlenk tube with a magnetic bar. Anhydrous 1,4-dioxane (1.0 mL) was charged and the solution was stirred at 70 °C for 12 h. The reaction mixture was detected by TLC and GC-MS. The **3az** was not observed.

#### 4.7 Solvent effect on the E/Z selectivity

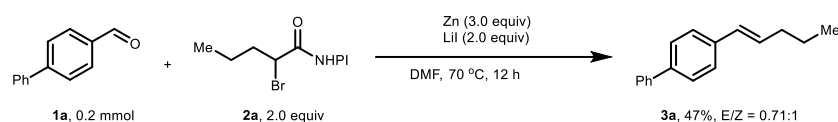

Under the argon atmosphere, 4-biphenylcarboxaldehyde **1a** (0.2 mmol, 36.4 mg, 1.0 equiv), 1,3-dioxoisindolin-2-yl 2-bromopentanoate **2a** (0.4 mmol, 131.0 mg, 2.0 equiv), Zn power (0.6 mmol, 39.2 mg, 3.0 equiv) and LiI (0.4 mmol, 54.0 mg, 2.0 equiv) were added to a 10 mL Schlenk tube with a magnetic bar. Anhydrous DMF (1.0 mL) was charged and the solution was stirred at 70 °C for 12 h. The reaction mixture was concentrated under reduced pressure. The residual was purified by column chromatography on silica gel (eluent: petroleum ether/ethyl acetate = 50:1) to afford **3a** (21.0 mg) in 47 % yield as a white solid.

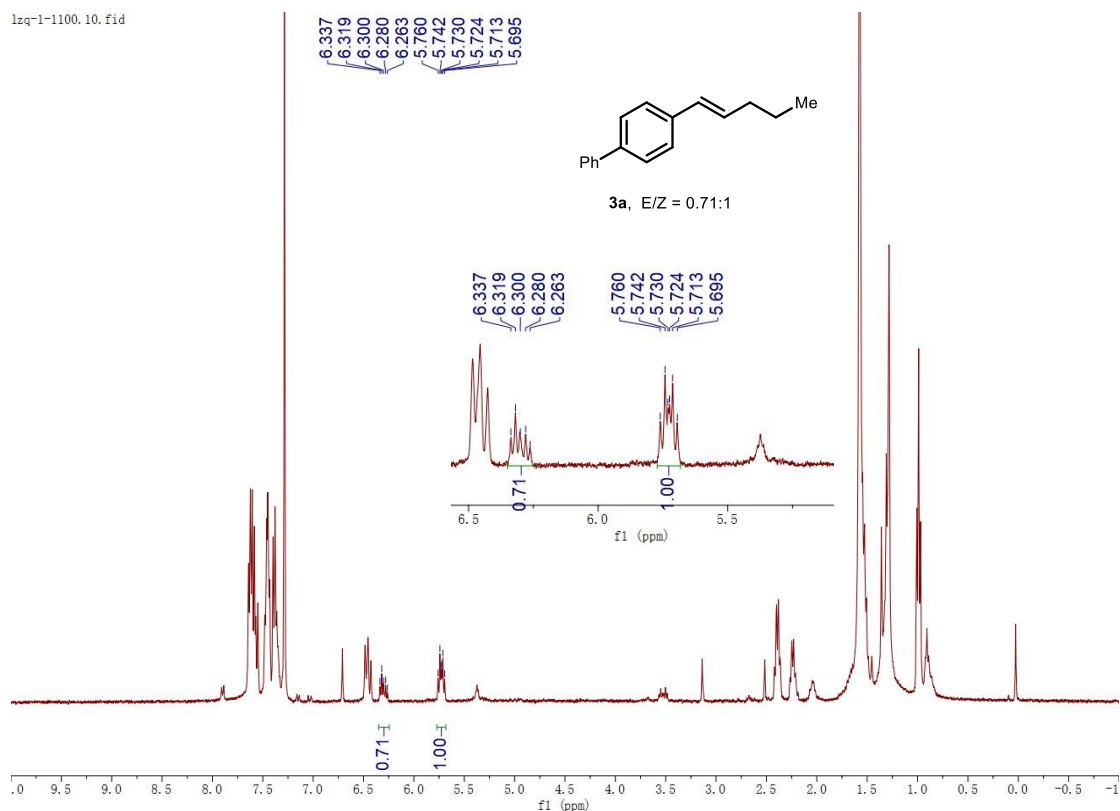

**Figure S5.** <sup>1</sup>H NMR of the reaction mixture (CDCl<sub>3</sub>, 400 MHz).

## 4.8 Cyclic Voltammetry experiments

(I) CV measurement of the oxidation potential of  $\alpha$ -Br-NHPI ester, NHPI ester,  $\alpha$ -Br ester.

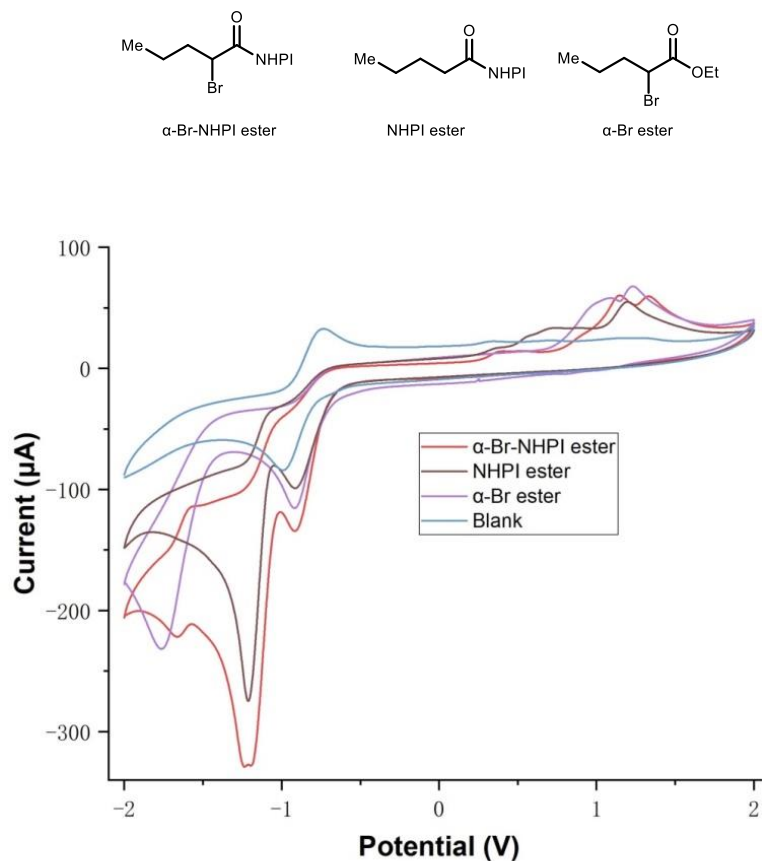

**Figure S6. Cyclic Voltammogram for  $\alpha$ -Br-NHPI ester, NHPI ester and  $\alpha$ -Br ester.** Redox potentials were measured by cyclic voltammetry in degassed MeCN at room temperature (two segments: 2 V to  $-2.0$  V and then back to 2 V; sweep rate 100 mV/s) under air. The concentration of  $\alpha$ -Br-NHPI ester, NHPI ester and  $\alpha$ -Br ester were 10 mM and  $\text{Bu}_4\text{NPF}_6$  (0.1 M) was employed as the supporting electrolyte. A standard three-electrode assembly consisting of a glassy carbon disk as the working electrode, copper plated with platinum as the counter electrode, and Ag/AgCl (saturated in 3 M KCl) as the reference electrode was used.

(II) CV measurement of the oxidation potential of  $\alpha$ -Br-NHPI ester,  $\alpha$ -Br-NHPI ester + LiI and  $\alpha$ -Br-NHPI ester +  $\text{ZnBr}_2$

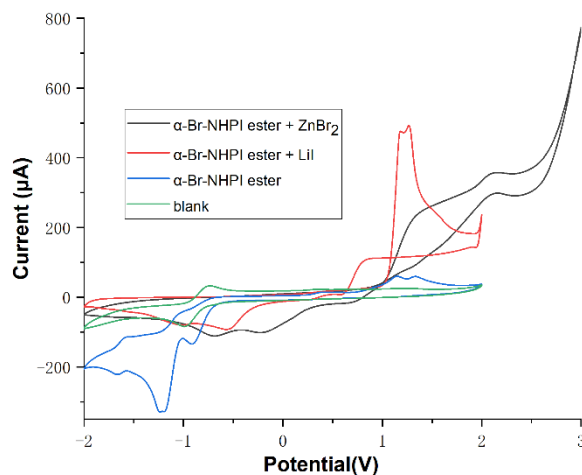

**Figure S7. Cyclic Voltammogram for  $\alpha$ -Br-NHPI ester,  $\alpha$ -Br-NHPI ester + LiI and  $\alpha$ -Br-NHPI ester +  $\text{ZnBr}_2$ .** Redox potentials were measured by cyclic voltammetry in degassed MeCN at room temperature (two segments: 2 V to  $-2.0$  V and then back to 3 V; sweep rate 100 mV/s) under air. The concentration of  $\alpha$ -Br-NHPI ester,  $\alpha$ -Br-NHPI ester + LiI and  $\alpha$ -Br-NHPI ester +  $\text{ZnBr}_2$  were 10 mM, and  $\text{Bu}_4\text{NPF}_6$  (0.1 M) was employed as the supporting electrolyte. A standard three-electrode assembly consisting of a glassy carbon disk as the working electrode, copper plated with platinum as the counter electrode, and Ag/AgCl (saturated in 3 M KCl) as the reference electrode was used.

## 4.9 Analysis of UV-Vis absorption spectra

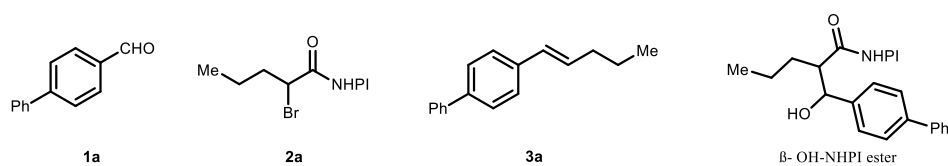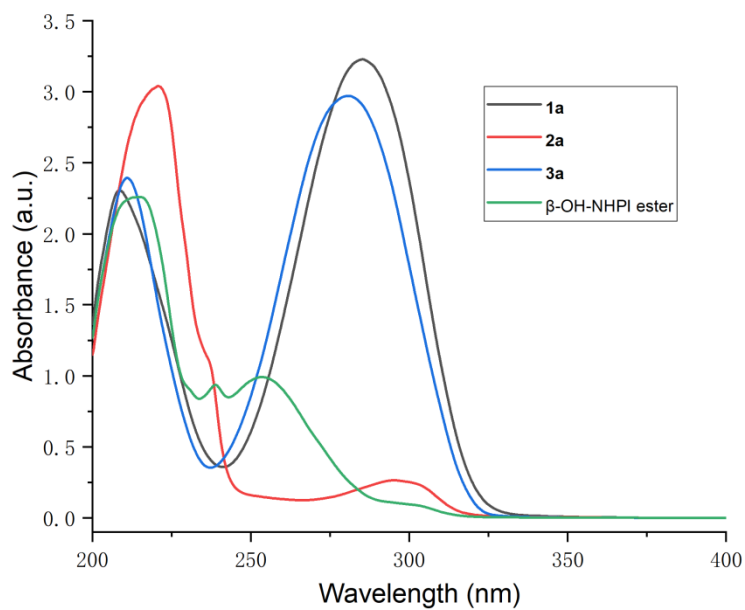

**Figure S8.** UV-visible absorption spectra of **1a**, **2a**, **3a** and  $\beta$ -OH-NHPI ester recorded at room temperature in MeCN ( $3 \times 10^{-4}$  M).

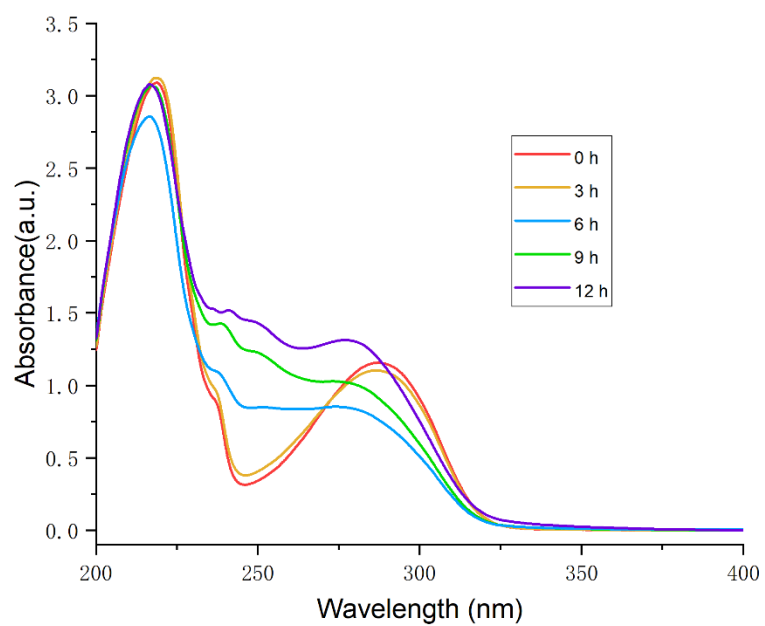

**Figure S9.** UV-visible absorption spectra of reaction mixture 0 h, 3 h, 6 h, 9 h and 12 h recorded at room temperature in MeCN ( $3 \times 10^{-4}$  M).

## 5. References

1. Huang, Y.; Liu, Z.; Liu, W. H., Deaminative Addition of Alkylpyridinium Salt to Aldehyde. *Org. Lett.* **2023**, *25*, 4934-4939.
2. Gao, Y.; Hill, D. E.; Hao, W.; McNicholas, B. J.; Vantourout, J. C.; Hadt, R. G.; Reisman, S. E.; Blackmond, D. G.; Baran, P. S., Electrochemical Nozaki–Hiyama–Kishi Coupling: Scope, Applications, and Mechanism. *J. Am. Chem. Soc.* **2021**, *143*, 9478-9488.
3. Yang, H.; Dong, W.; Wang, W.; Li, T.; Zhao, W., Stereoselective Rhodium-Catalyzed Isomerization of Stereoisomeric Mixtures of Arylalkenes. *Synthesis* **2020**, *52*, 2833-2840.
4. Liu, L.; Guo, K.-X.; Tian, Y.; Yang, C.-J.; Gu, Q.-S.; Li, Z.-L.; Ye, L.; Liu, X.-Y., Copper-Catalyzed Intermolecular Enantioselective Radical Oxidative C(sp<sup>3</sup>)–H/C(sp)–H Cross-Coupling with Rationally Designed Oxazoline-Derived N,N,P(O)-Ligands. *Angew. Chem. Int. Ed.* **2021**, *60*, 26710-26717.
5. Shin, J. H.; Seong, E. Y.; Mun, H. J.; Jang, Y. J.; Kang, E. J., Electronically Mismatched Cycloaddition Reactions via First-Row Transition Metal, Iron(III)–Polypyridyl Complex. *Org. Lett.* **2018**, *20*, 5872-5876.
6. Yue, F.; Dong, J.; Liu, Y.; Wang, Q., Visible-Light-Mediated Alkenylation of Alkyl Boronic Acids without an External Lewis Base as an Activator. *Org. Lett.* **2021**, *23*, 2477-2481.
7. Rong, M.-G.; Qin, T.-Z.; Liu, X.-R.; Wang, H.-F.; Zi, W., De Novo Synthesis of Phenols and Naphthols through Oxidative Cycloaromatization of Dienynes. *Org. Lett.* **2018**, *20*, 6289-6293.
8. McGuigan, C.; Bidet, O.; Derudas, M.; Andrei, G.; Snoeck, R.; Balzarini, J., Alkenyl Substituted Bicyclic Nucleoside Analogues Retain Nanomolar Potency Against Varicella Zoster Virus. *Bioorg. Med. Chem.* **2009**, *17*, 3025-3027.
9. Billard, F.; Robiette, R.; Pospíšil, J., Julia–Kocienski Reaction-Based 1,3-Diene Synthesis: Aldehyde-Dependent (E,E/Z)-Selectivity. *J. Org. Chem.* **2012**, *77*, 6358-6364.
10. Sai, M., Direct Reduction of Allylic Alcohols Using Isopropanol as Reductant. *Adv. Synth. Catal.* **2018**, *360*, 3482-3487.
11. Khusid, A. K.; Kovalev, B. G., Phase-transfer Version of the Wittig Reaction and Its Stereochemistry in the Aliphatic Series. *J. Org. Chem. USSR (Engl. Transl.)* **1987**, *23*:1.
12. Bogner, S.; van Gemmeren, M., A Modular Olefination of Aldehydes with Thiols as Coupling Partners. *Chem. Eur. J.* **2023**, *29*, e202203512.

13. Bao, H.; Zhou, B.; Luo, S.-P.; Xu, Z.; Jin, H.; Liu, Y., P/N Heteroleptic Cu(I)-Photosensitizer-Catalyzed Deoxygenative Radical Alkylation of Aromatic Alkynes with Alkyl Aldehydes Using Dipropylamine as a Traceless Linker Agent. *ACS Catal.* **2020**, *10*, 7563-7572.
14. Kurandina, D.; Rivas, M.; Radzhabov, M.; Gevorgyan, V., Heck Reaction of Electronically Diverse Tertiary Alkyl Halides. *Org. Lett.* **2018**, *20*, 357-360.
15. Wang, Z.-J.; Zheng, S.; Romero, E.; Matsui, J. K.; Molander, G. A., Regioselective Single-Electron Tsuji–Trost Reaction of Allylic Alcohols: A Photoredox/Nickel Dual Catalytic Approach. *Org. Lett.* **2019**, *21*, 6543-6547.
16. Colomer, I.; Coura Barcelos, R.; Donohoe, T. J., Catalytic Hypervalent Iodine Promoters Lead to Styrene Dimerization and the Formation of Tri- and Tetrasubstituted Cyclobutanes. *Angew. Chem. Int. Ed.* **2016**, *55*, 4748-4752.
17. Zhang, Y.; Tanabe, Y.; Kuriyama, S.; Nishibayashi, Y., Photoredox- and Nickel-Catalyzed Hydroalkylation of Alkynes with 4-Alkyl-1,4-dihydropyridines: Ligand-Controlled Regioselectivity. *Chem. Eur. J.* **2022**, *28*, e202200727.
18. Jedinak, L.; Rush, L.; Lee, M.; Hesek, D.; Fisher, J. F.; Boggess, B.; Noll, B. C.; Mobashery, S., Use of Silver Carbonate in the Wittig Reaction. *J. Org. Chem.* **2013**, *78*, 12224-12228.
19. Liu, W.; Li, L.; Chen, Z.; Li, C.-J., A Transition-metal-free Heck-type Reaction Between Alkenes and Alkyl Iodides Enabled by Light in Water. *Org. Biomol. Chem.* **2015**, *13*, 6170-6174.
20. Inoue, A.; Shinokubo, H.; Oshima, K., Oxidative Heck-Type Reaction Involving Cleavage of a Carbon–Phosphorus Bond of Arylphosphonic Acids. *J. Am. Chem. Soc.* **2003**, *125*, 1484-1485.
21. Cheng, C.; Simmons, E. M.; Hartwig, J. F., Iridium-Catalyzed, Diastereoselective Dehydrogenative Silylation of Terminal Alkenes with (TMSO)<sub>2</sub>MeSiH. *Angew. Chem. Int. Ed.* **2013**, *52*, 8984-8989.
22. Logan, A. W. J.; Parker, J. S.; Hallside, M. S.; Burton, J. W., Manganese(III) Acetate Mediated Oxidative Radical Cyclizations. Toward Vicinal All-Carbon Quaternary Stereocenters. *Org. Lett.* **2012**, *14*, 2940-2943.
23. Yang, H.; Sun, P.; Zhu, Y.; Yan, H.; Lu, L.; Qu, X.; Li, T.; Mao, J., Copper-catalyzed Decarboxylative C(sp<sup>2</sup>)–C(sp<sup>3</sup>) Coupling Reactions via Radical Mechanism. *Chem. Commun.* **2012**, *48*, 7847-7849.
24. Kang, T.; Erbay, T. G.; Xu, K. L.; Gallego, G. M.; Burtea, A.; Nair, S. K.; Patman, R. L.; Zhou,



- R.; Sutton, S. C.; McAlpine, I. J.; Liu, P.; Engle, K. M., Multifaceted Substrate–Ligand Interactions Promote the Copper-Catalyzed Hydroboration of Benzyldenecyclobutanes and Related Compounds. *ACS Catal.* **2020**, *10*, 13075-13083.
25. Ogawa, H.; Yang, Z.-K.; Minami, H.; Kojima, K.; Saito, T.; Wang, C.; Uchiyama, M., Revisitation of Organoaluminum Reagents Affords a Versatile Protocol for C–X (X = N, O, F) Bond-Cleavage Cross-Coupling: A Systematic Study. *ACS Catal.* **2017**, *7*, 3988-3994.
26. Silva, A. R.; Polo, E. C.; Martins, N. C.; Correia, C. R. D., Enantioselective Oxy-Heck–Matsuda Arylations: Expeditious Synthesis of Dihydrobenzofuran Systems and Total Synthesis of the Neolignan (–)-Conocarpan. *Adv. Synth. Catal.* **2018**, *360*, 346-365.
27. Matsuda, T.; Suzuki, K.; Miura, N., Rhodium-Catalyzed Cross-Coupling of Alkenyl Halides with Arylboron Compounds. *Adv. Synth. Catal.* **2013**, *355*, 3396-3400.
28. Huang, Q.; Wang, W.-N.; Zhu, S.-F., Iron-Catalyzed Alkylzincation of Terminal Alkynes. *ACS Catal.* **2022**, *12*, 2581-2588.
29. Tejeda-Serrano, M.; Cabrero-Antonino, J. R.; Mainar-Ruiz, V.; López-Haro, M.; Hernández-Garrido, J. C.; Calvino, J. J.; Leyva-Pérez, A.; Corma, A., Synthesis of Supported Planar Iron Oxide Nanoparticles and Their Chemo- and Stereoselectivity for Hydrogenation of Alkynes. *ACS Catal.* **2017**, *7*, 3721-3729.

## 6. Copies of NMR spectra

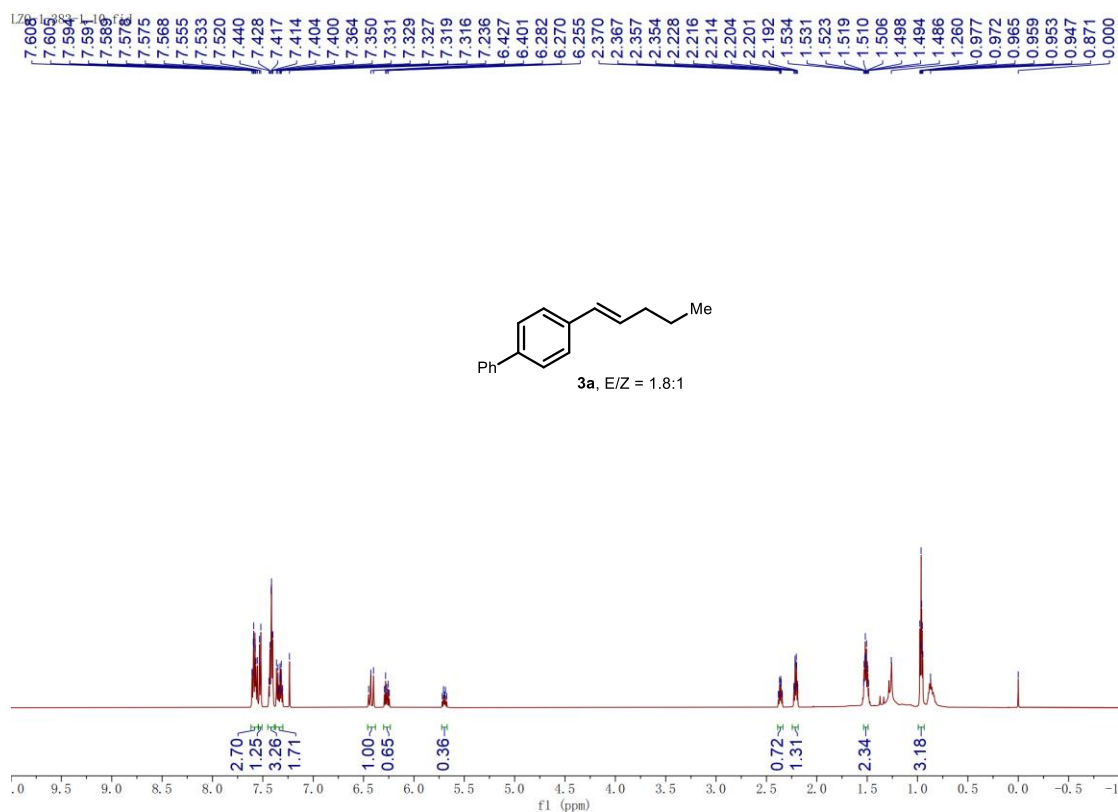

**Figure S10.**  $^1\text{H}$  NMR of **3a** (trans/cis mixture,  $\text{CDCl}_3$ , 600 MHz).

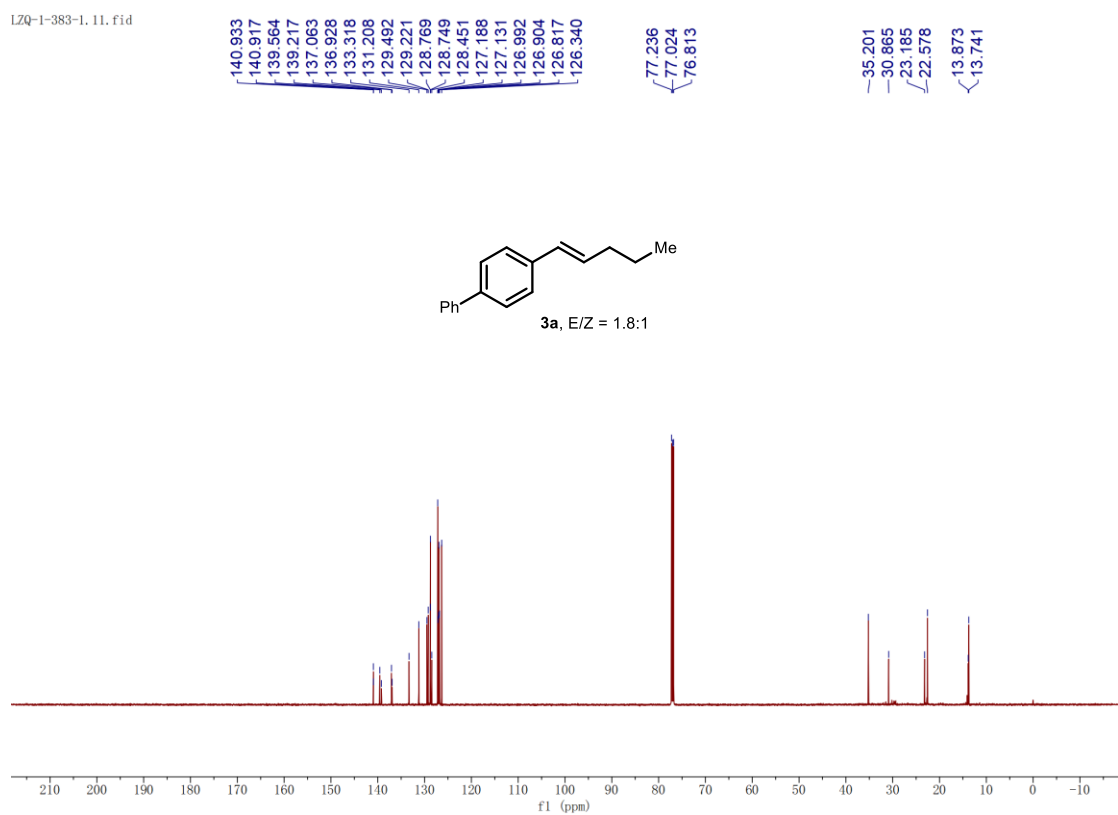

**Figure S11.**  $^{13}\text{C}$  NMR of **3a** (trans/cis mixture,  $\text{CDCl}_3$ , 151 MHz).

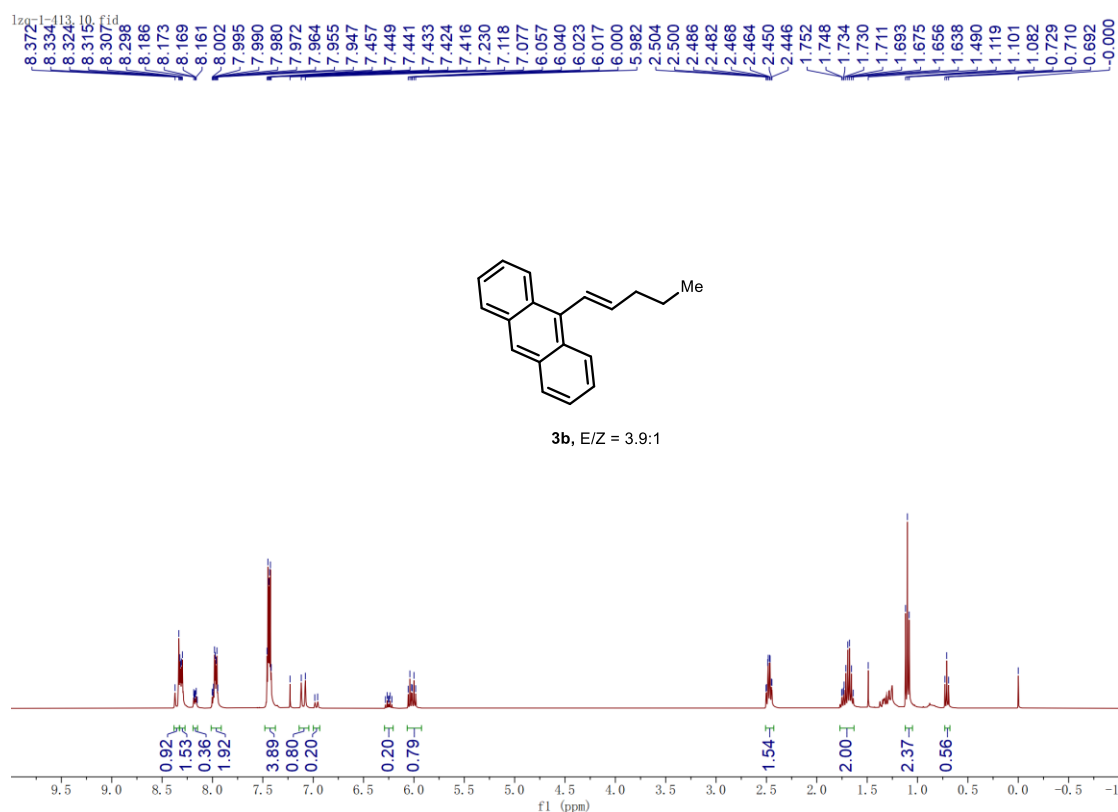

**Figure S12.**  $^1\text{H}$  NMR of **3b** (trans/cis mixture,  $\text{CDCl}_3$ , 400 MHz).

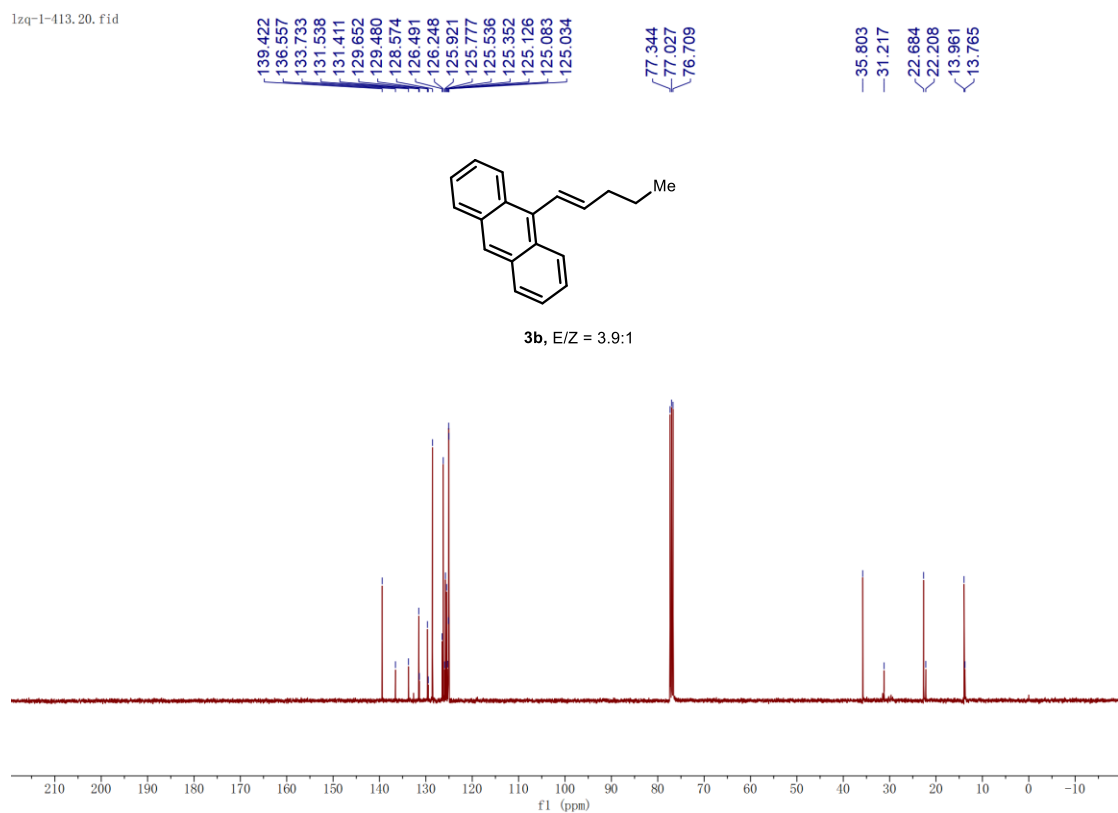

**Figure S13.**  $^{13}\text{C}$  NMR of **3b** (trans/cis mixture,  $\text{CDCl}_3$ , 101 MHz).

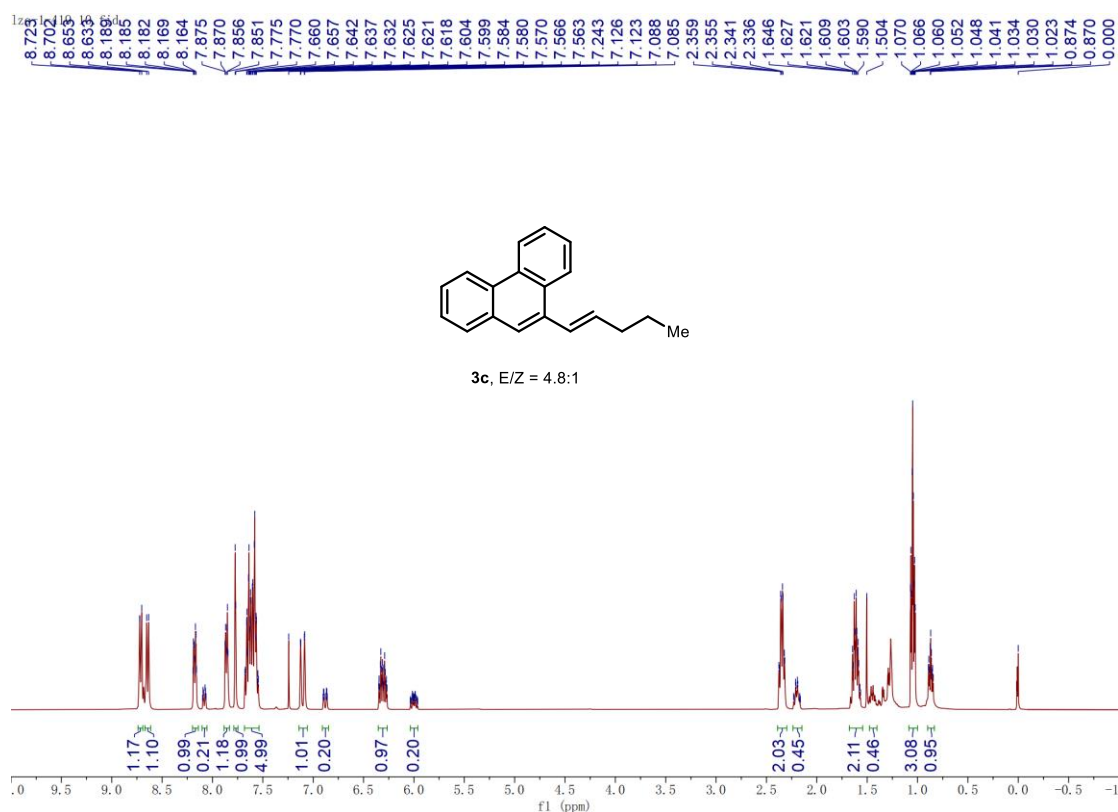

**Figure S14.** <sup>1</sup>H NMR of **3c** (trans/cis mixture, CDCl<sub>3</sub>, 400 MHz).

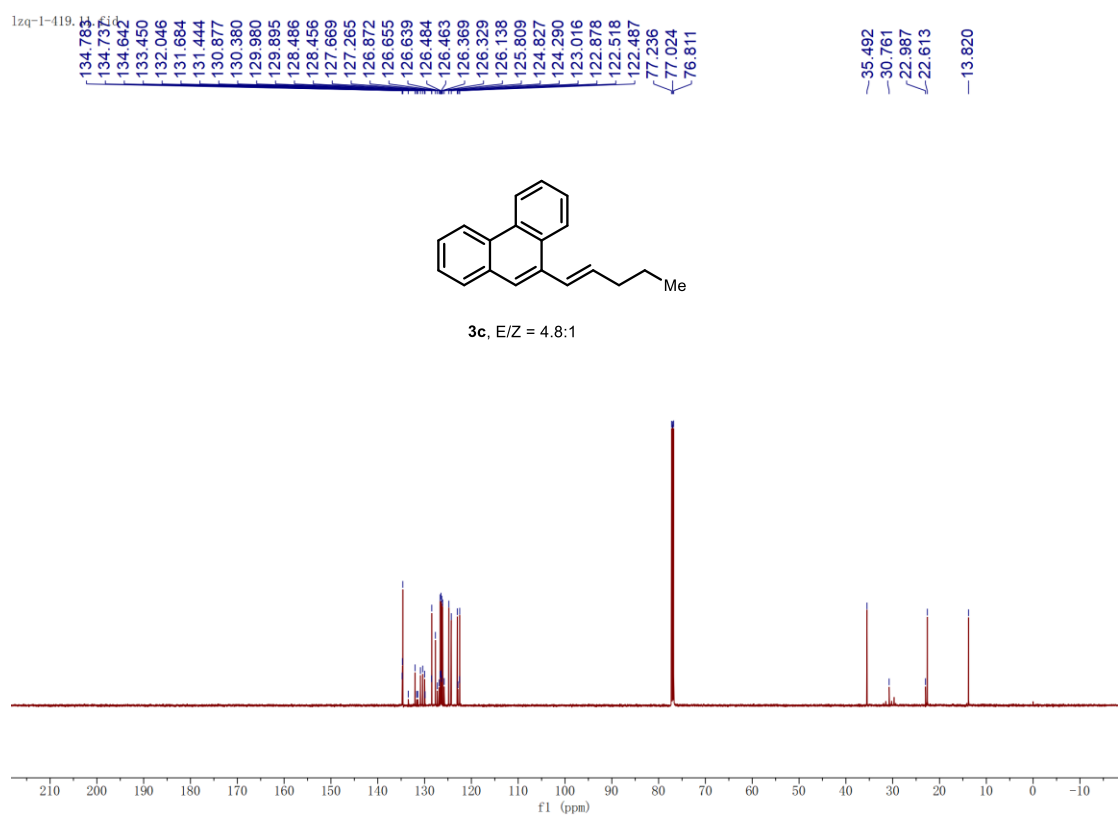

**Figure S15.** <sup>13</sup>C NMR of **3c** (trans/cis mixture, CDCl<sub>3</sub>, 151 MHz).

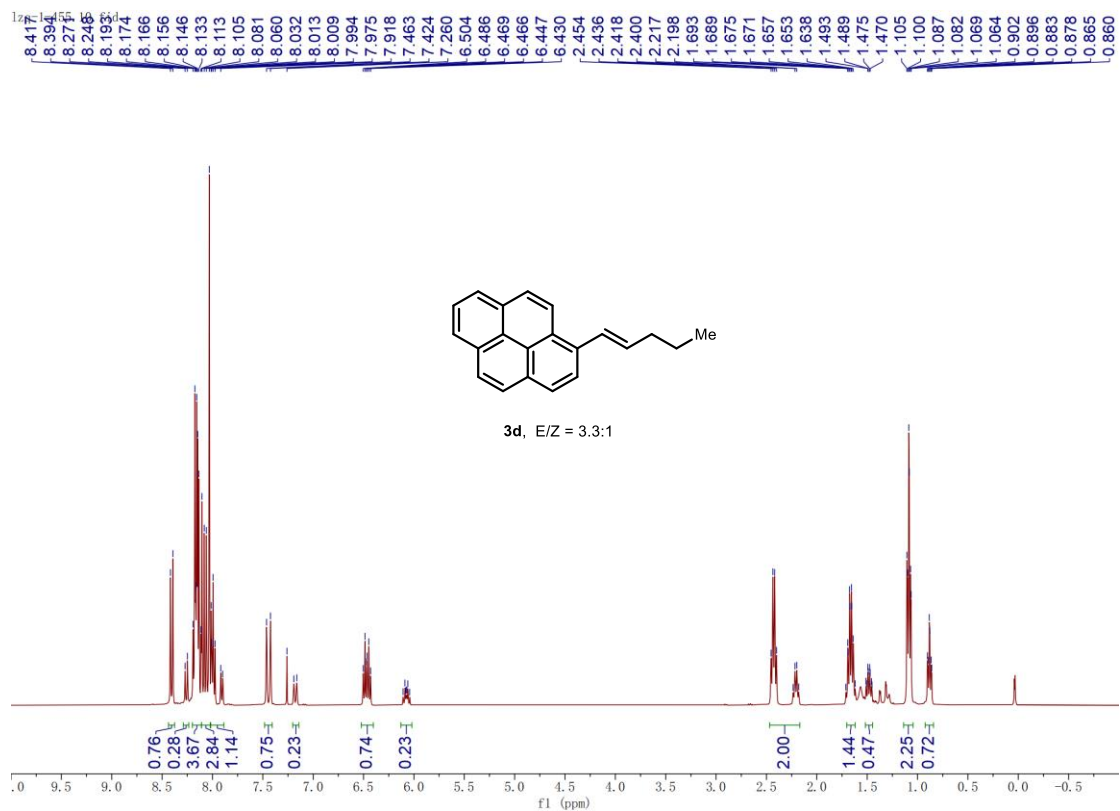

**Figure S16.** <sup>1</sup>H NMR of **3d** (trans/cis mixture, CDCl<sub>3</sub>, 400 MHz).

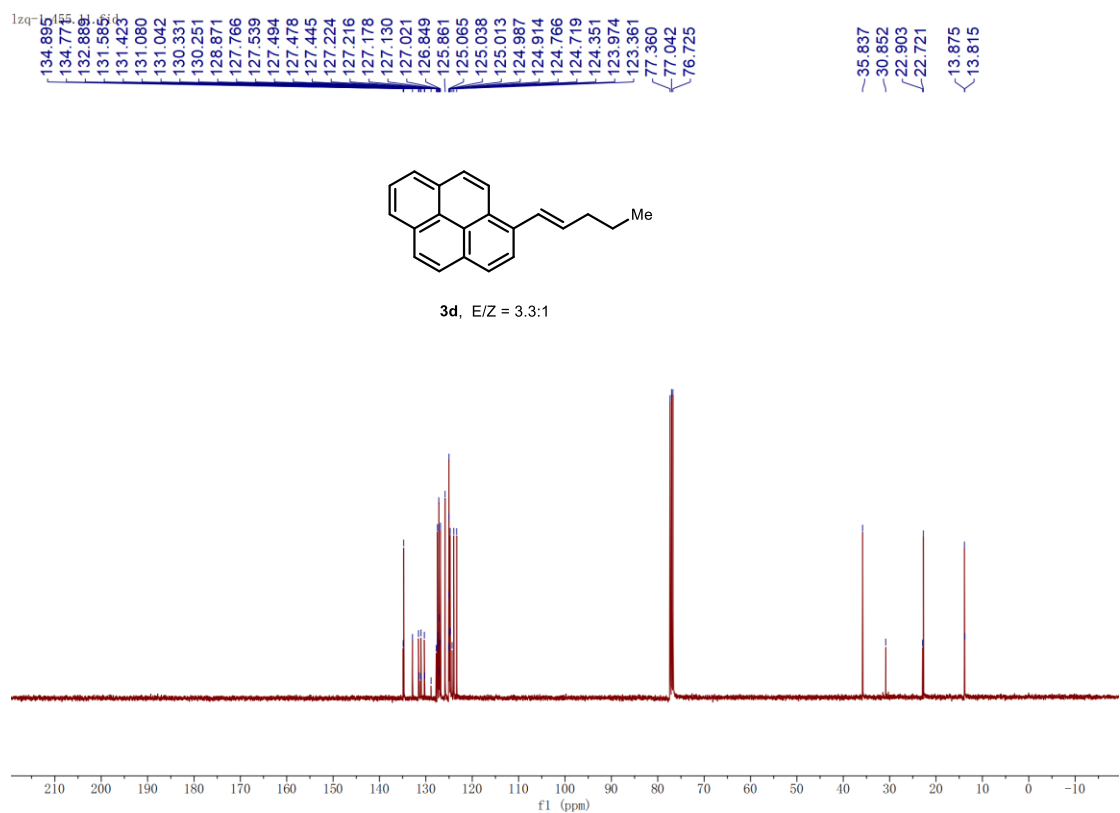

**Figure S17.** <sup>13</sup>C NMR of **3d** (trans/cis mixture, CDCl<sub>3</sub>, 101 MHz).

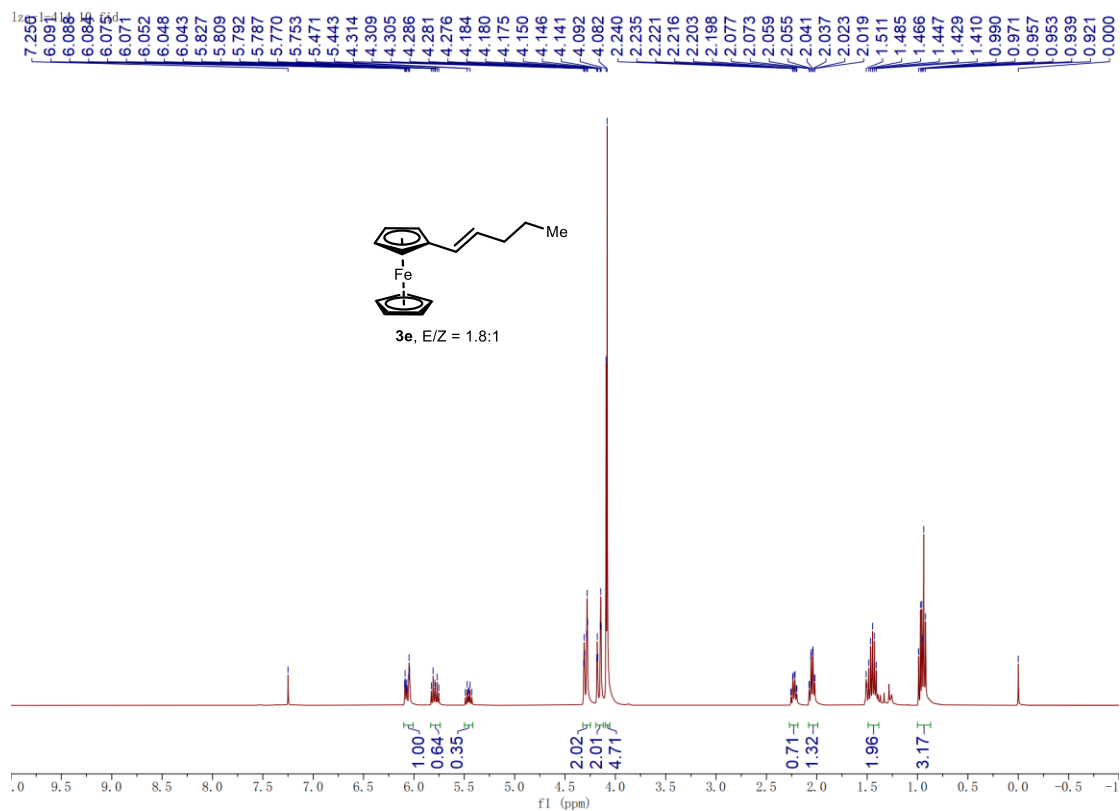

**Figure S18.** <sup>1</sup>H NMR of **3e** (trans/cis mixture, CDCl<sub>3</sub>, 400 MHz).

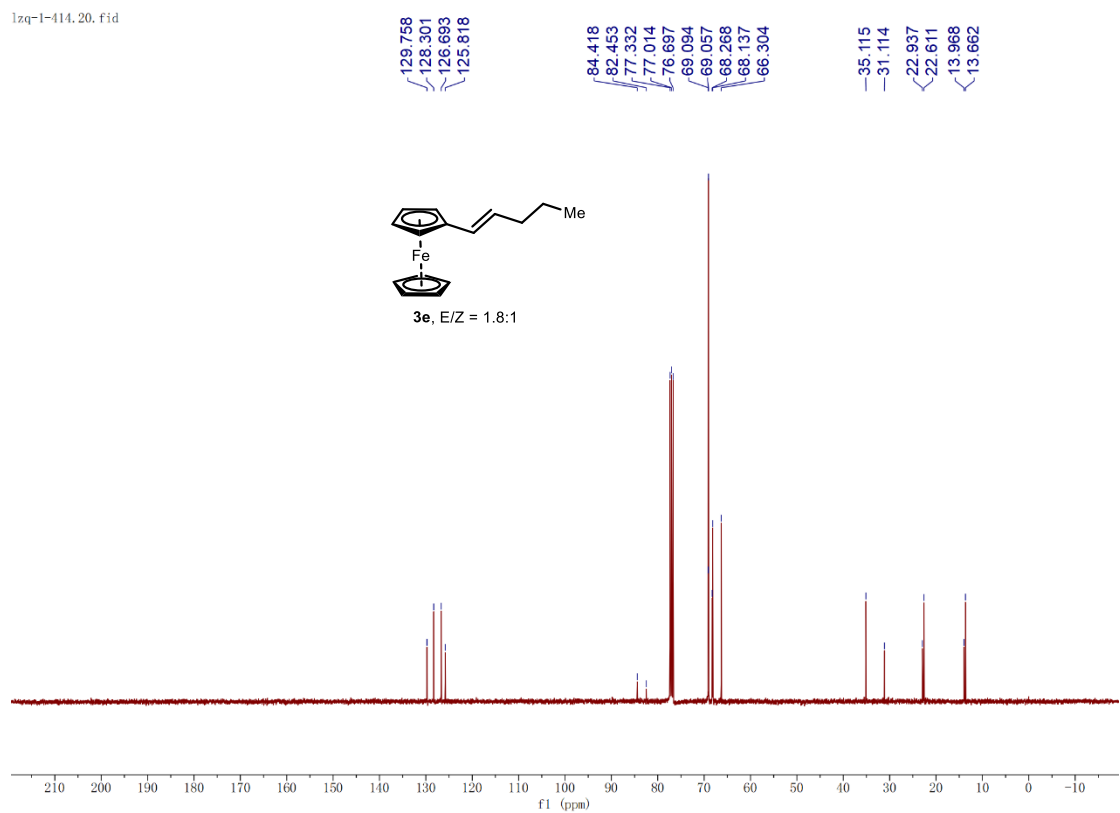

**Figure S19.** <sup>13</sup>C NMR of **3e** (trans/cis mixture, CDCl<sub>3</sub>, 101 MHz).

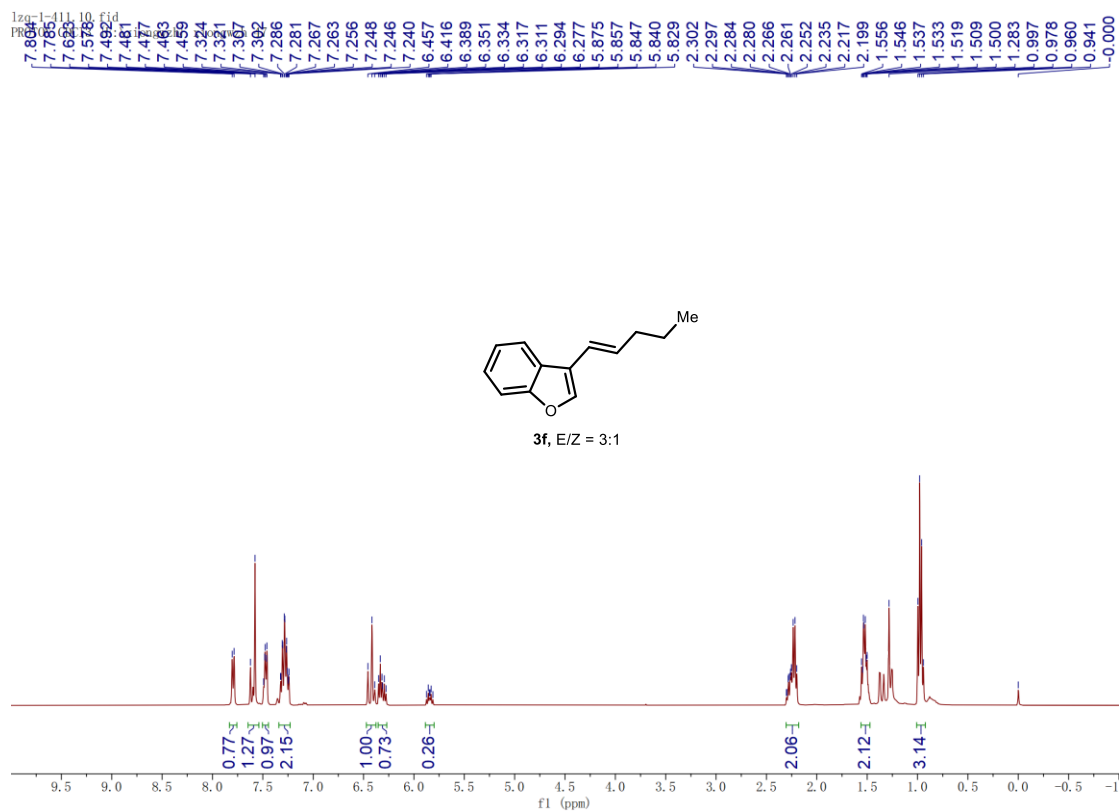

**Figure S20.**  $^1\text{H}$  NMR of **3f** (trans/cis mixture,  $\text{CDCl}_3$ , 400 MHz).

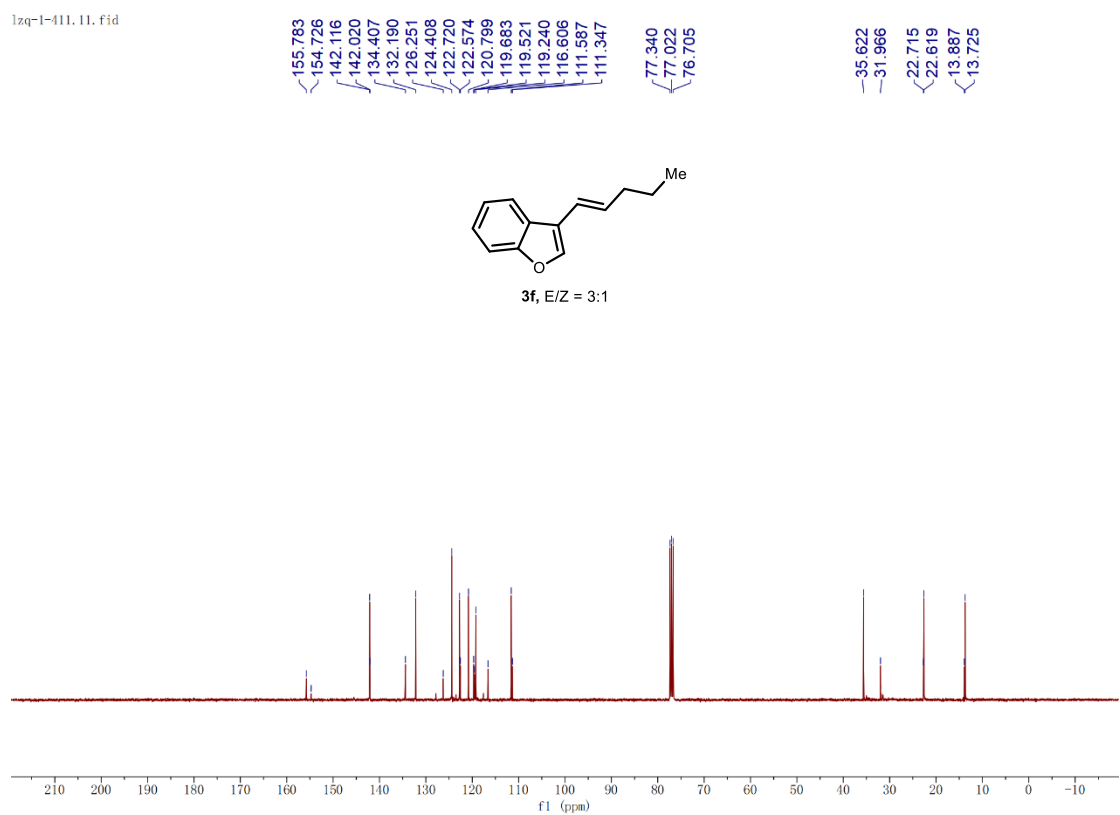

**Figure S21.**  $^{13}\text{C}$  NMR of **3f** (trans/cis mixture,  $\text{CDCl}_3$ , 101 MHz).

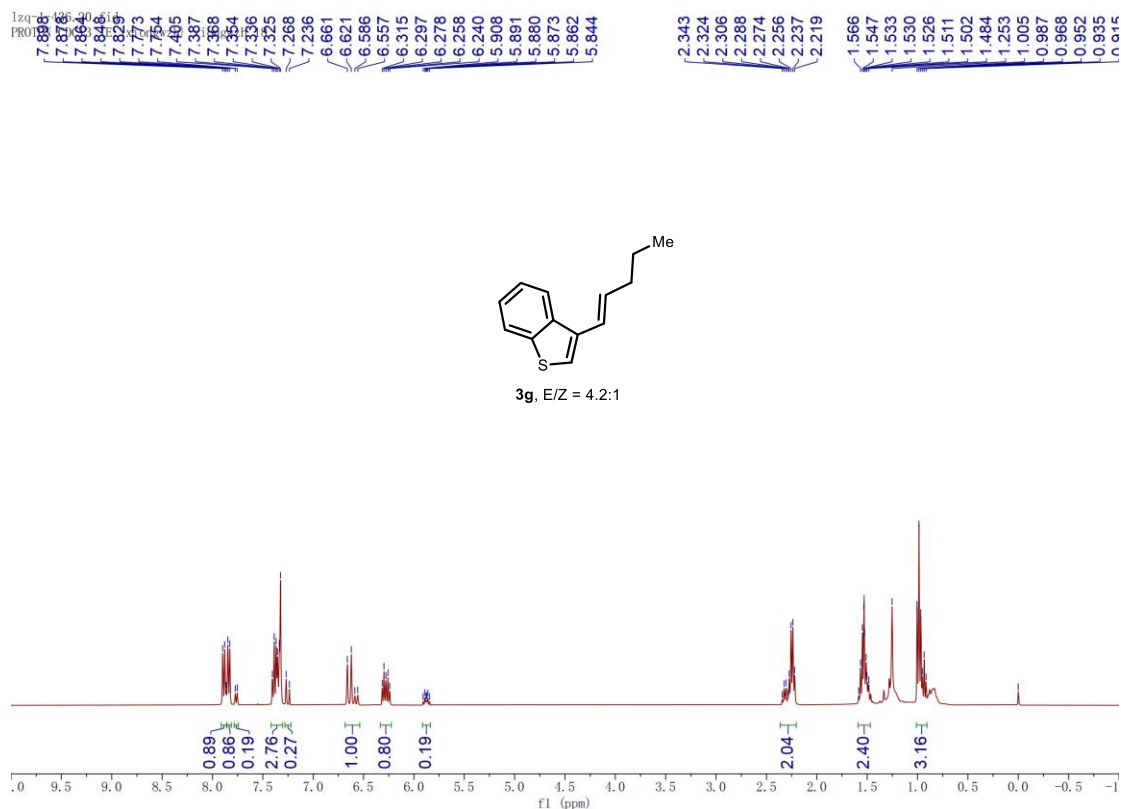

**Figure S22.**  $^1\text{H}$  NMR of **3g** (trans/cis mixture,  $\text{CDCl}_3$ , 400 MHz).

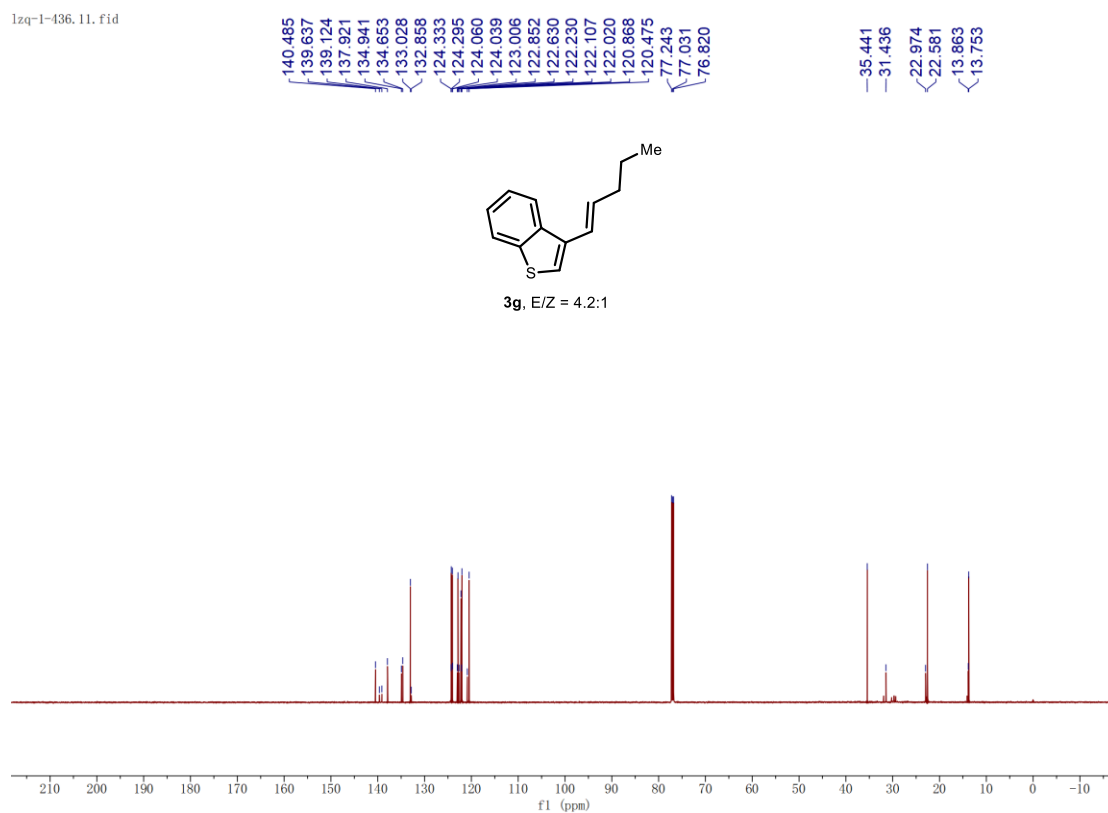

**Figure S23.**  $^{13}\text{C}$  NMR of **3g** (trans/cis mixture,  $\text{CDCl}_3$ , 151 MHz).



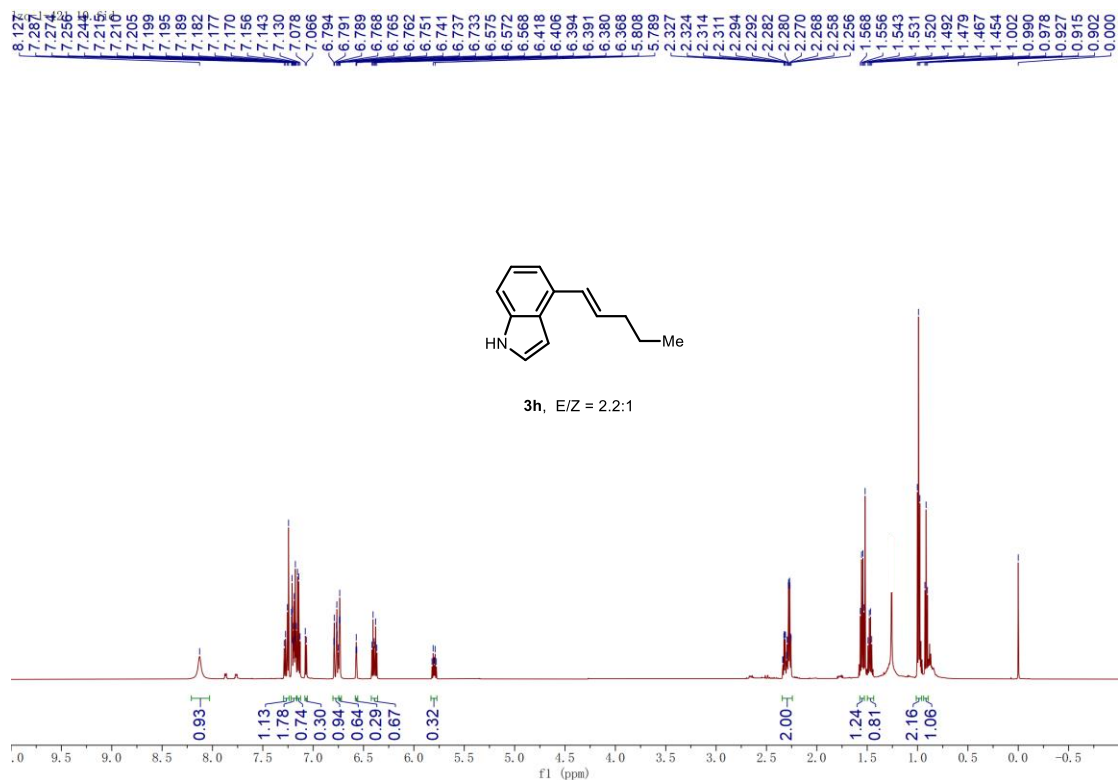

**Figure S24.** <sup>1</sup>H NMR of **3h** (trans/cis mixture, CDCl<sub>3</sub>, 600 MHz).

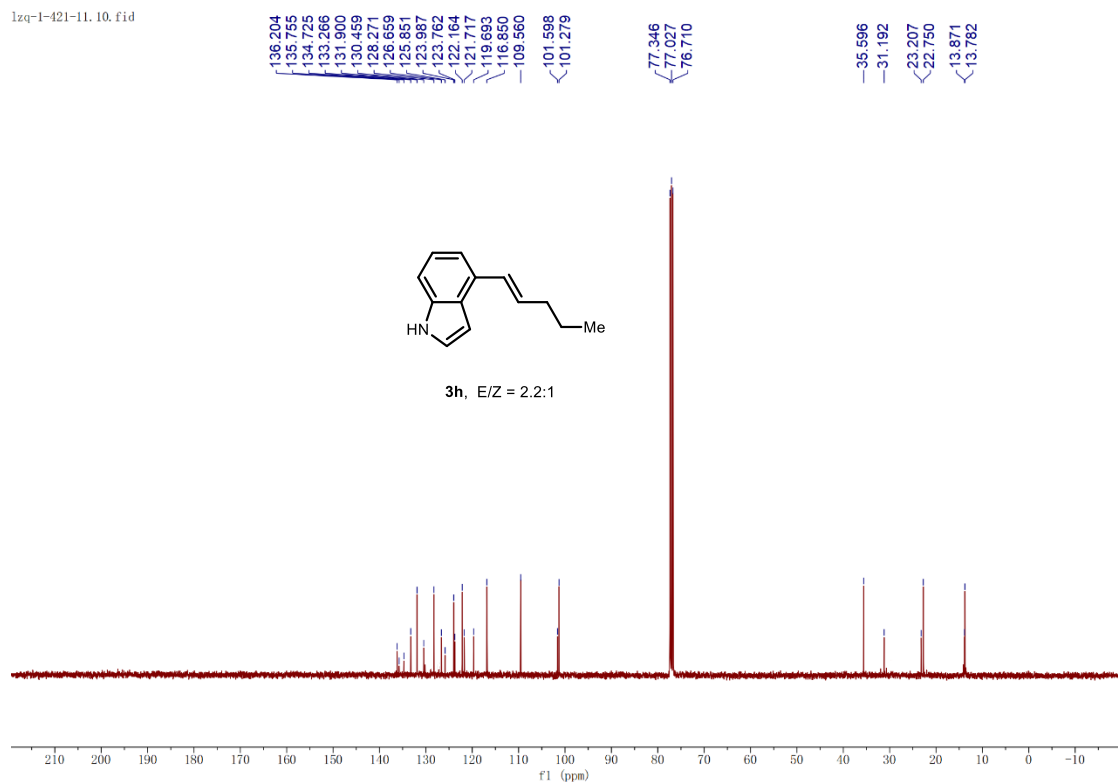

**Figure S25.** <sup>13</sup>C NMR of **3h** (trans/cis mixture, CDCl<sub>3</sub>, 101 MHz).

1zq-1-417.10.fid

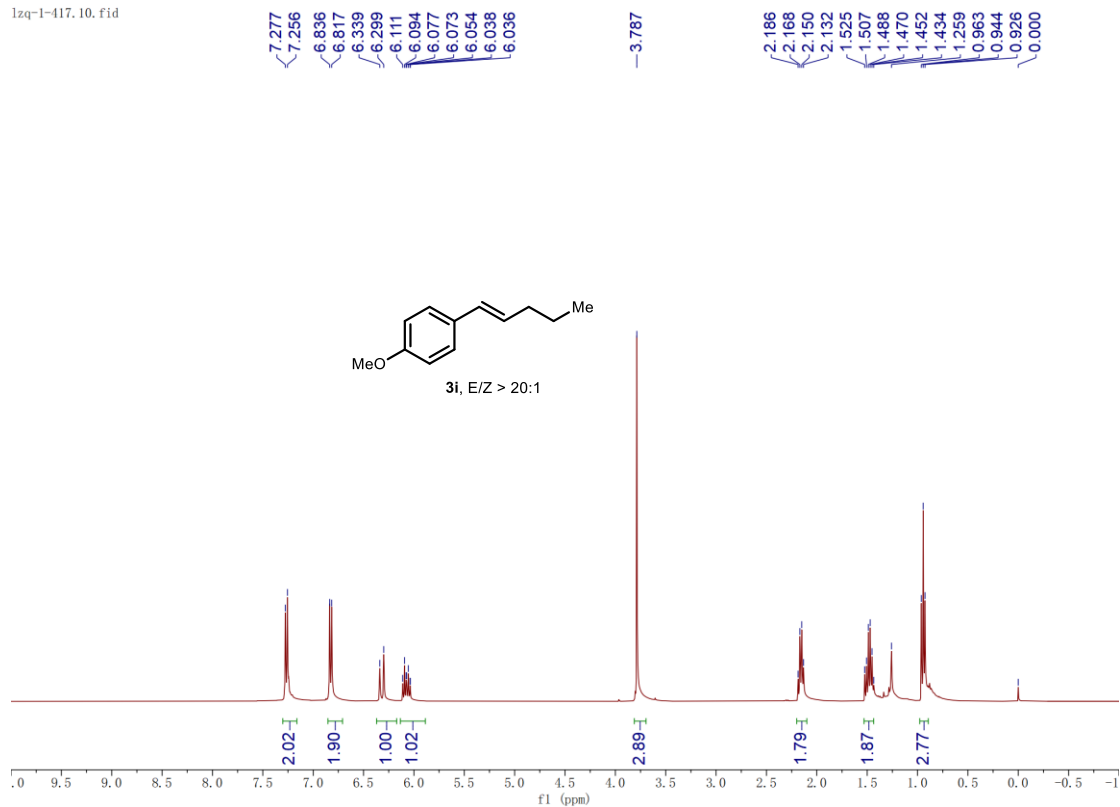

**Figure S26.** <sup>1</sup>H NMR of **3i** (trans, CDCl<sub>3</sub>, 400 MHz).

1zq-1-417.20.fid

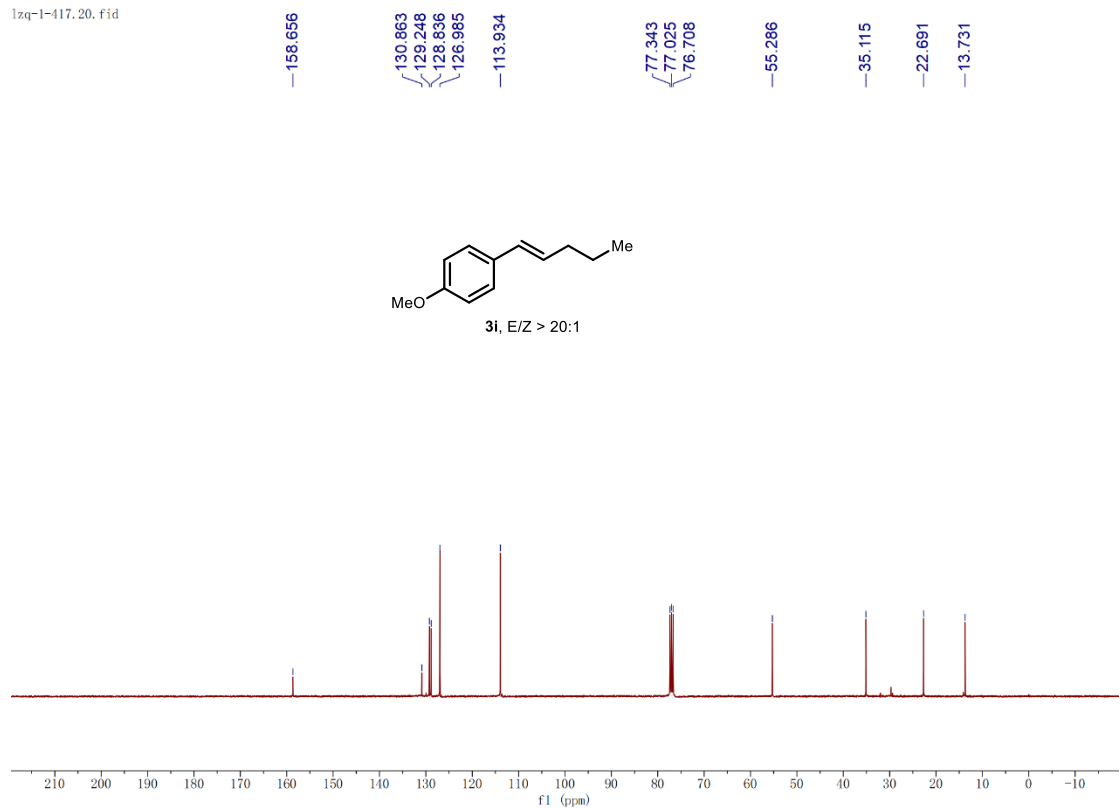

**Figure S27.** <sup>13</sup>C NMR of **3i** (trans, CDCl<sub>3</sub>, 101 MHz).

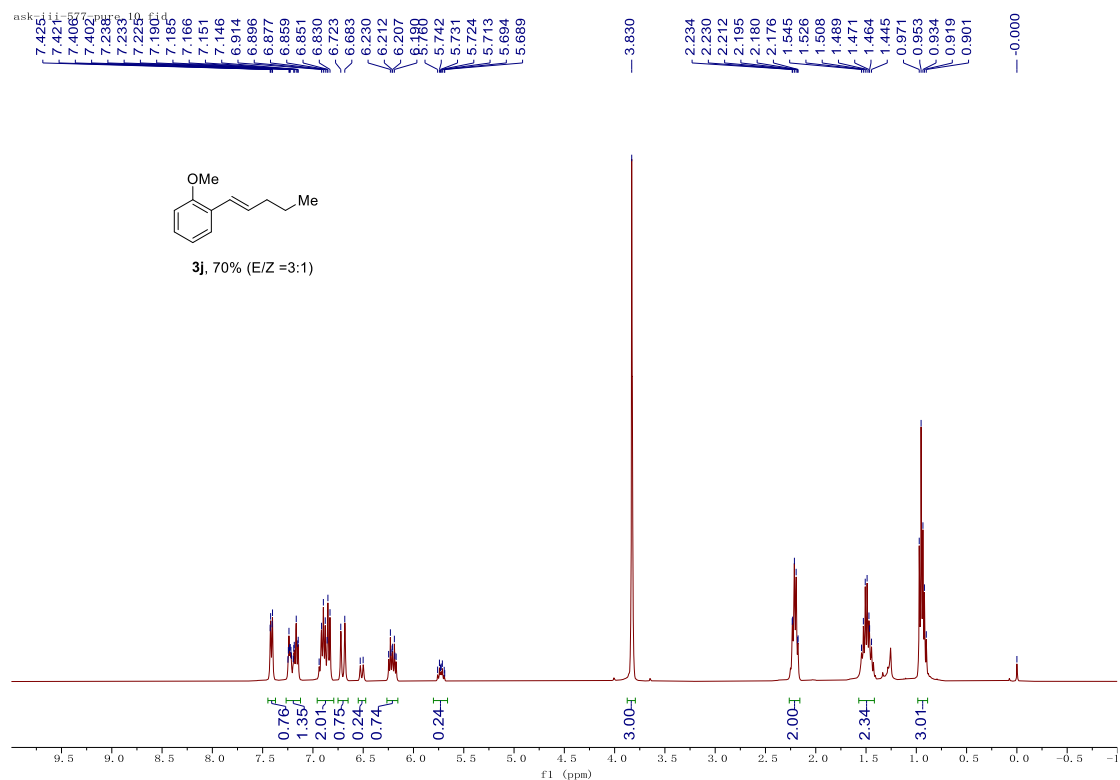

**Figure S28.**  $^1\text{H}$  NMR of **3j** (trans/cis mixture,  $\text{CDCl}_3$ , 400 MHz).

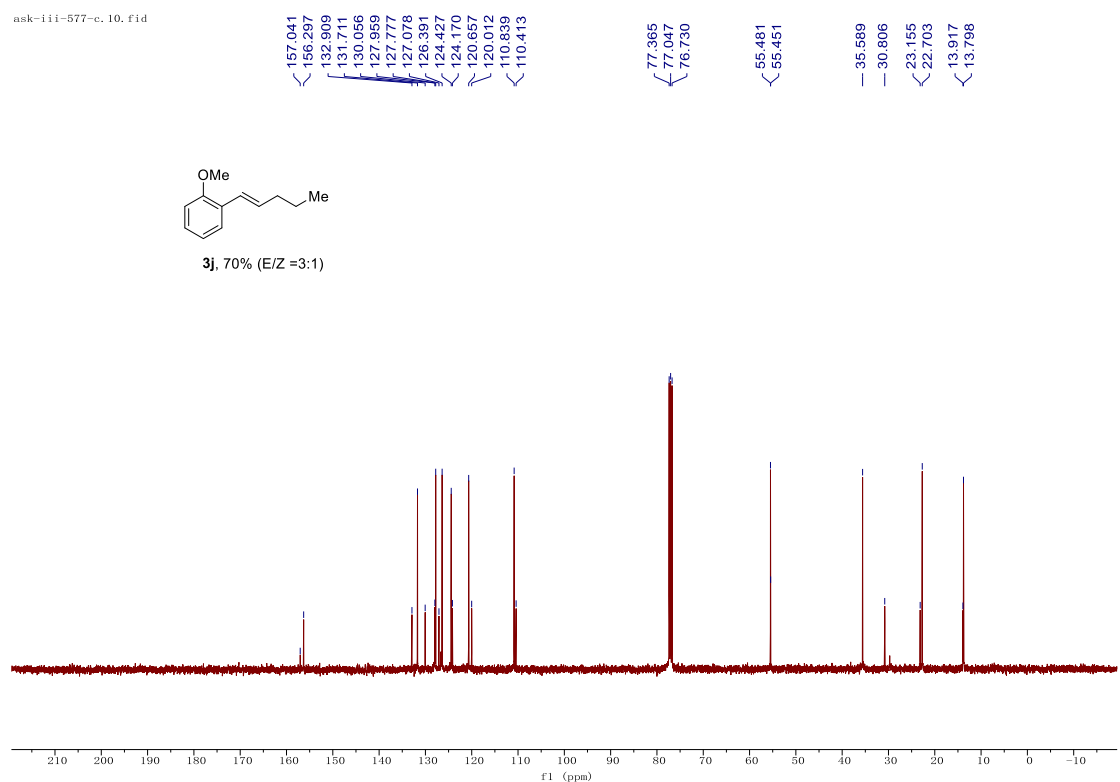

**Figure S29.**  $^{13}\text{C}$  NMR of **3j** (trans/cis mixture,  $\text{CDCl}_3$ , 101 MHz).

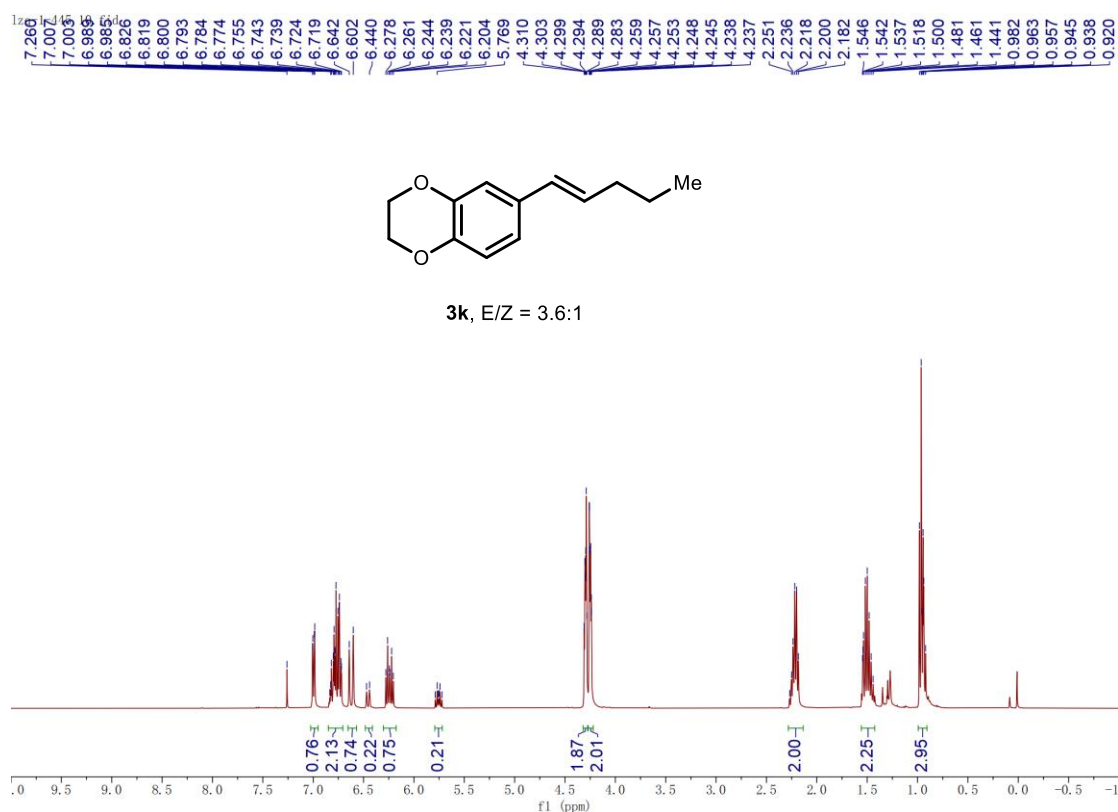

**Figure S30.** <sup>1</sup>H NMR of **3k** (trans/cis mixture, CDCl<sub>3</sub>, 400 MHz).

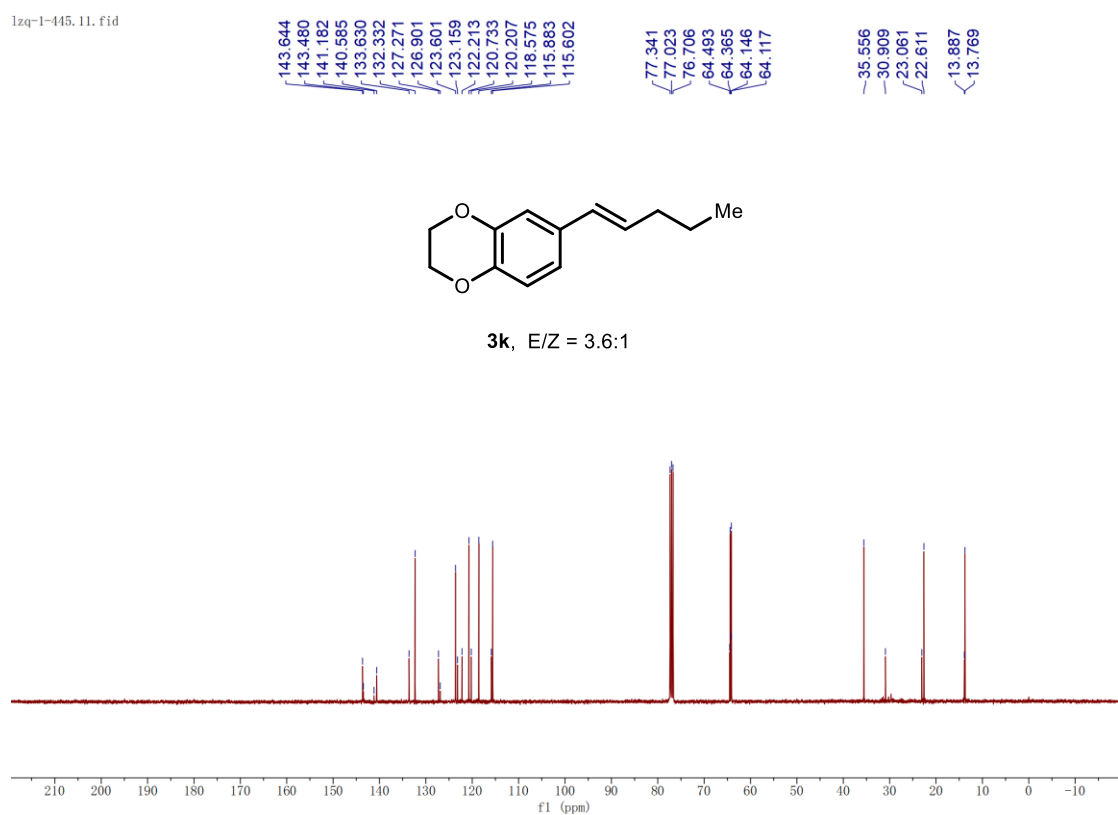

**Figure S31.** <sup>13</sup>C NMR of **3k** (trans/cis mixture, CDCl<sub>3</sub>, 101 MHz).

1zq-1-426, 10, fid

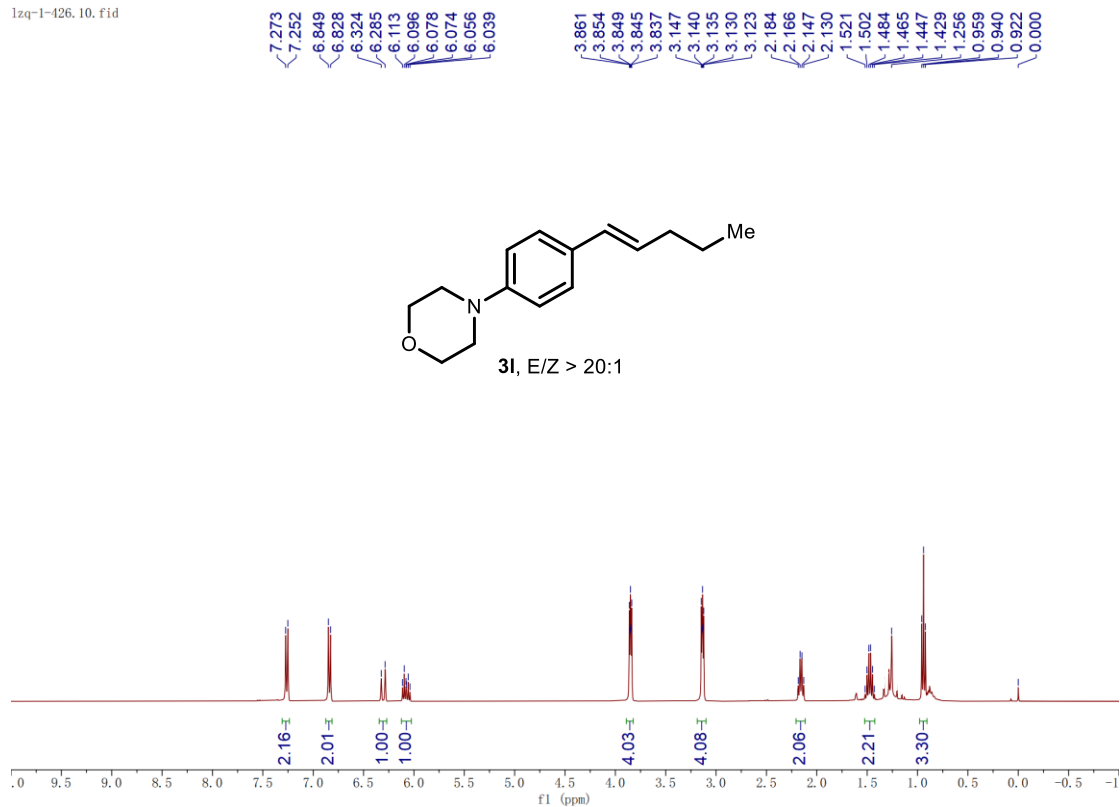

**Figure S32.** <sup>1</sup>H NMR of **3I** (trans, CDCl<sub>3</sub>, 400 MHz).

1zq-1-426, 11, fid

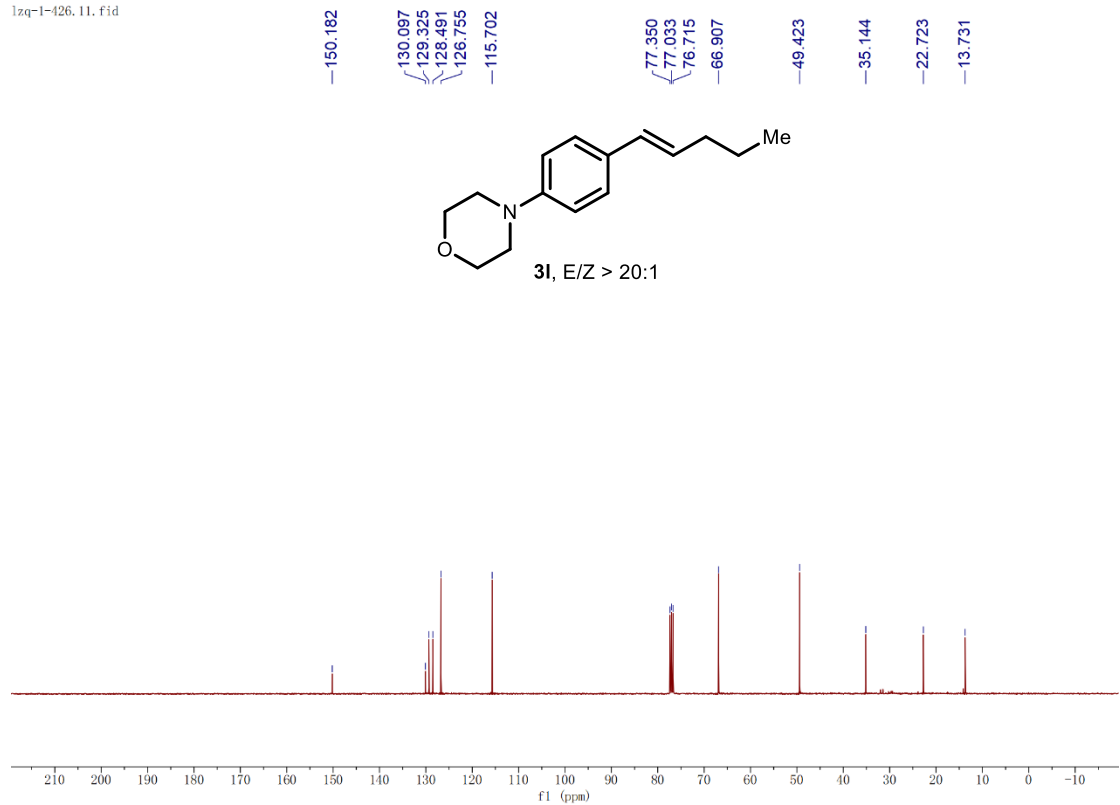

**Figure S33.** <sup>13</sup>C NMR of **3I** (trans, CDCl<sub>3</sub>, 101 MHz).

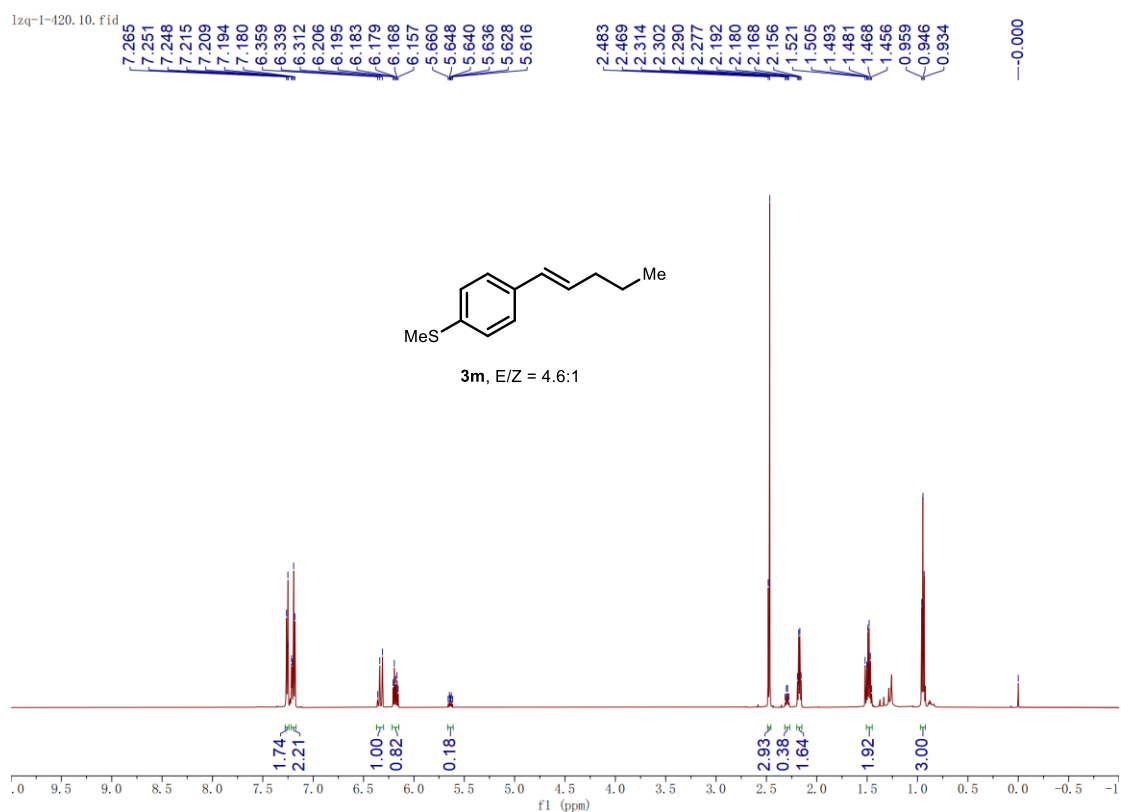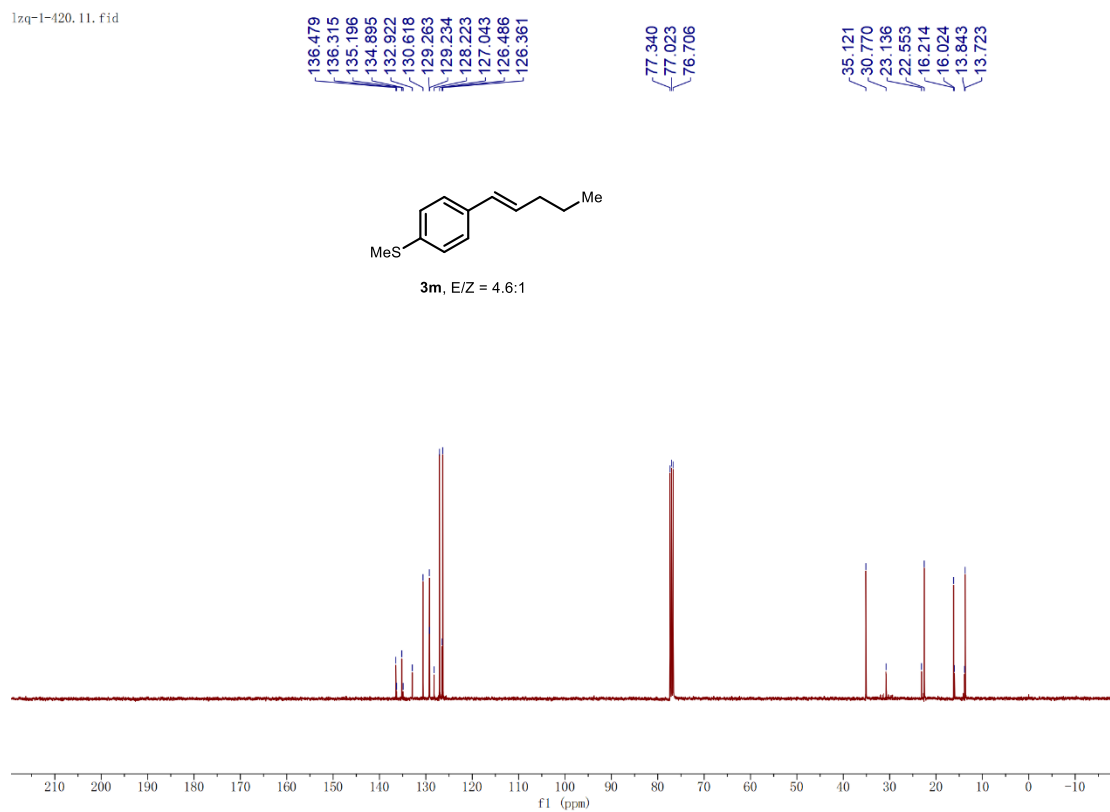

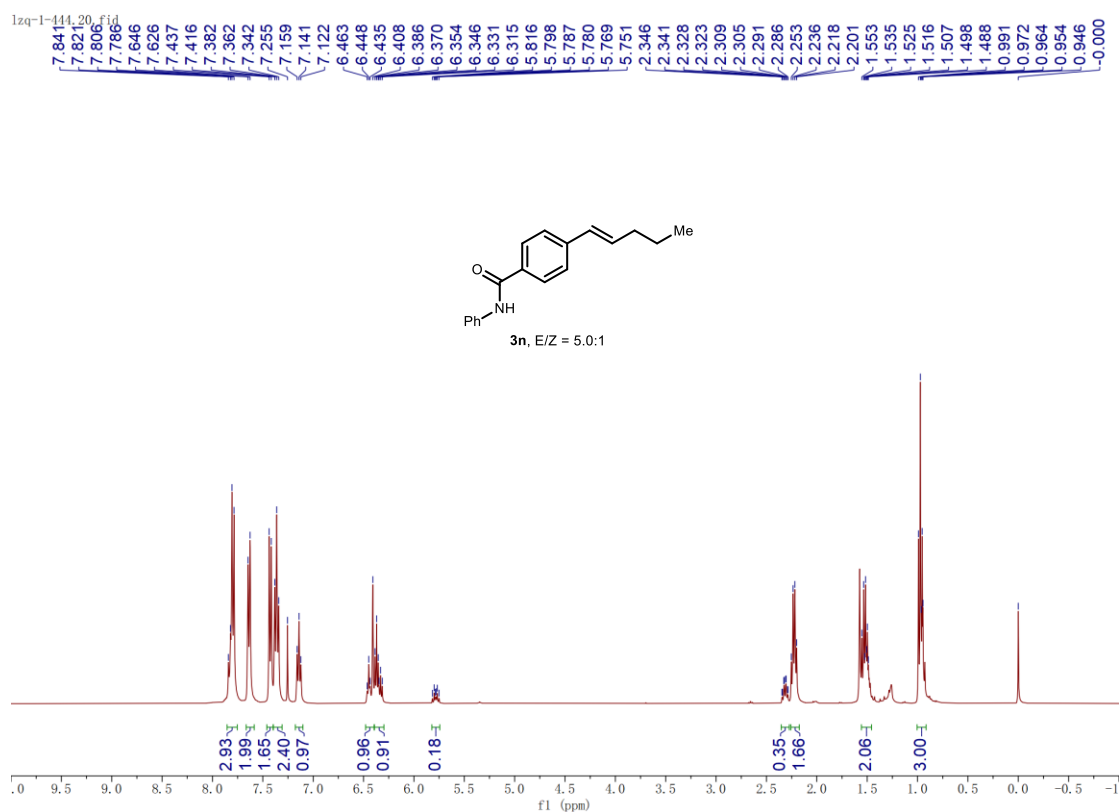

**Figure S36.**  $^1\text{H}$  NMR of **3n** (trans/cis mixture,  $\text{CDCl}_3$ , 400 MHz).

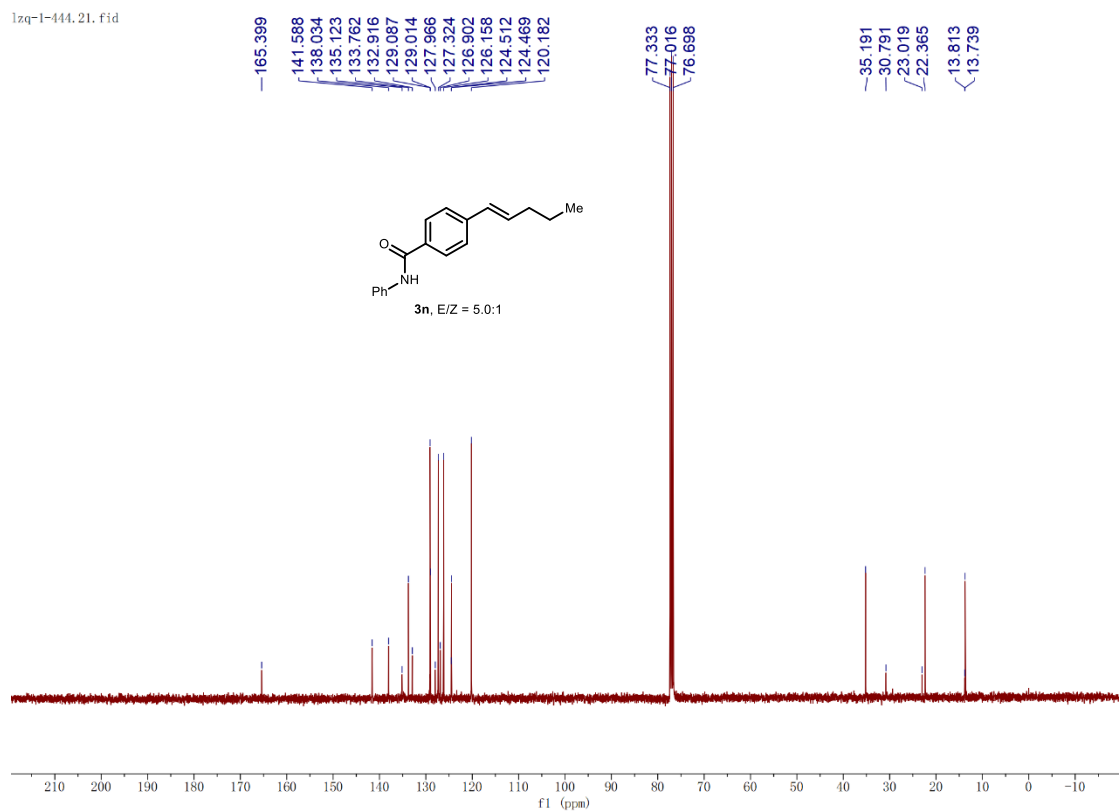

**Figure S37.**  $^{13}\text{C}$  NMR of **3n** (trans/cis mixture,  $\text{CDCl}_3$ , 101 MHz).

lzq-1-feng, 10, fid

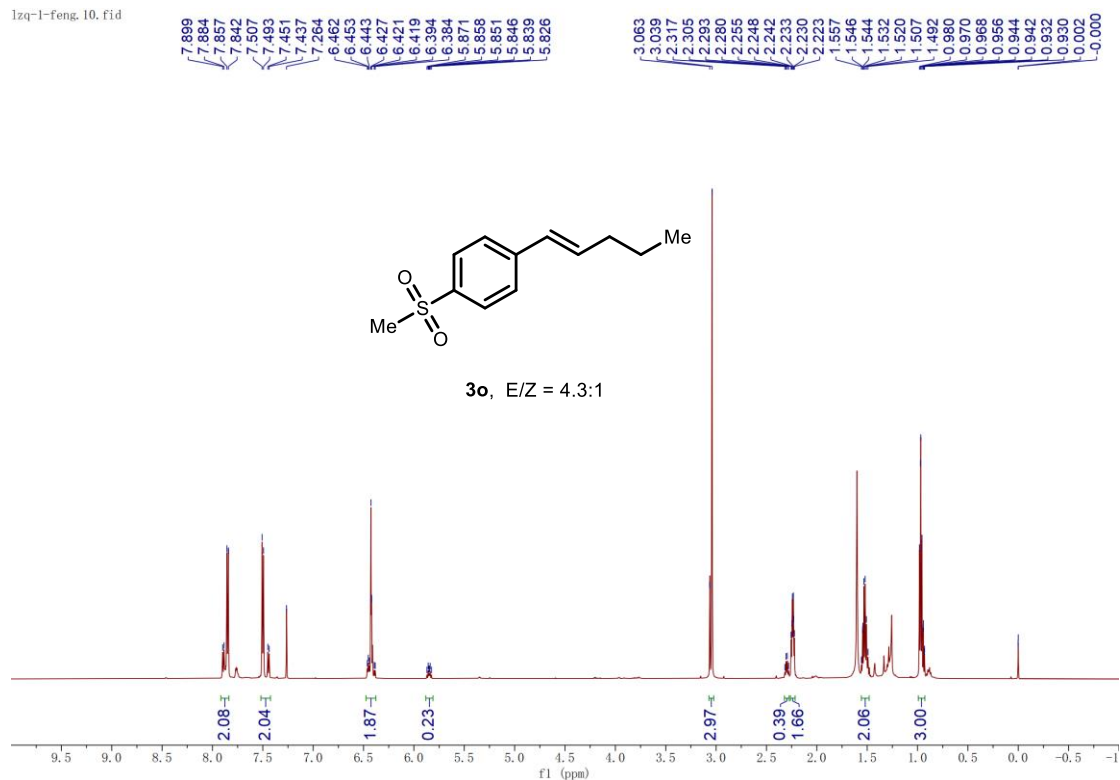

Figure S38. <sup>1</sup>H NMR of **3o** (trans/cis mixture, CDCl<sub>3</sub>, 600 MHz).

lzq-1-feng, 11, fid

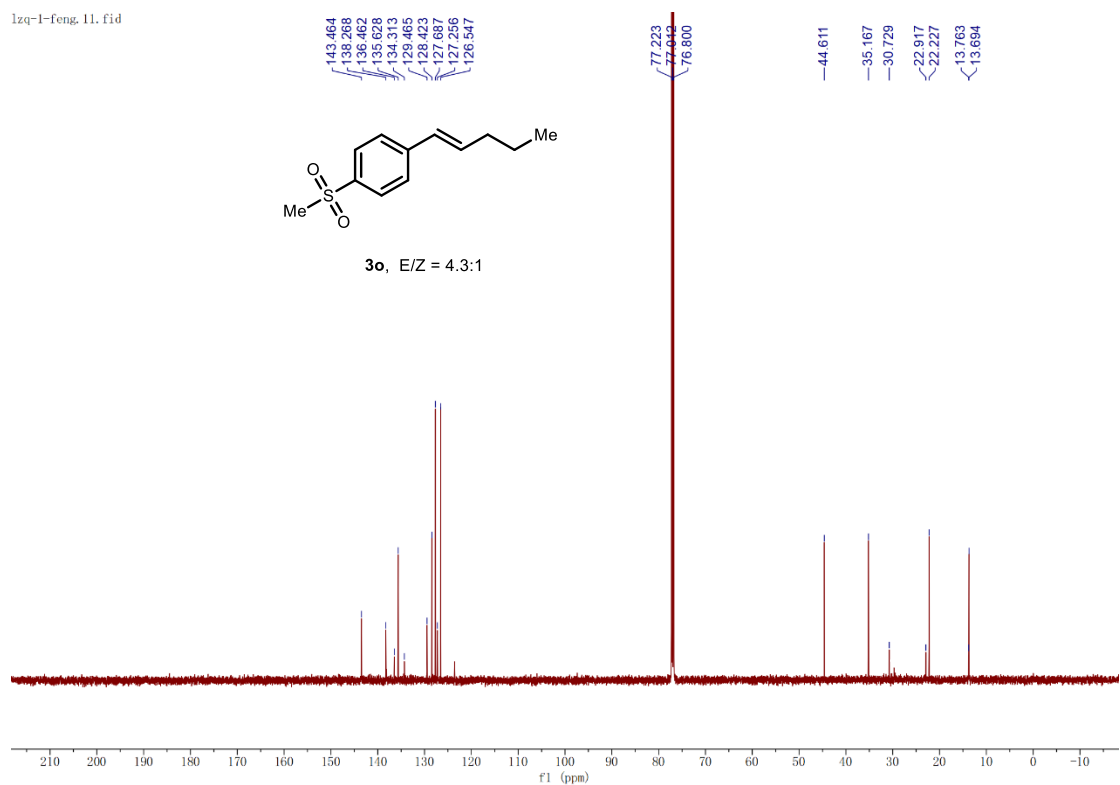

Figure S39. <sup>13</sup>C NMR of **3o** (trans/cis mixture, CDCl<sub>3</sub>, 151 MHz).



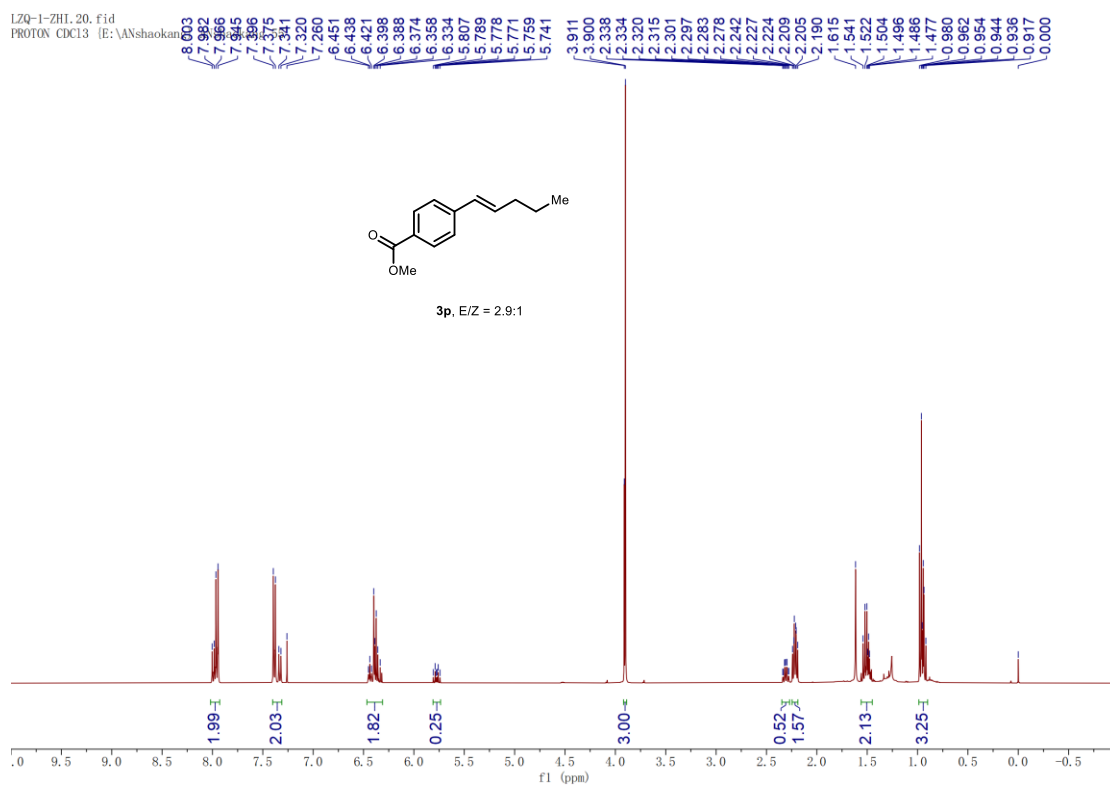

**Figure S40.**  $^1\text{H}$  NMR of **3p** (trans/cis mixture,  $\text{CDCl}_3$ , 400 MHz).

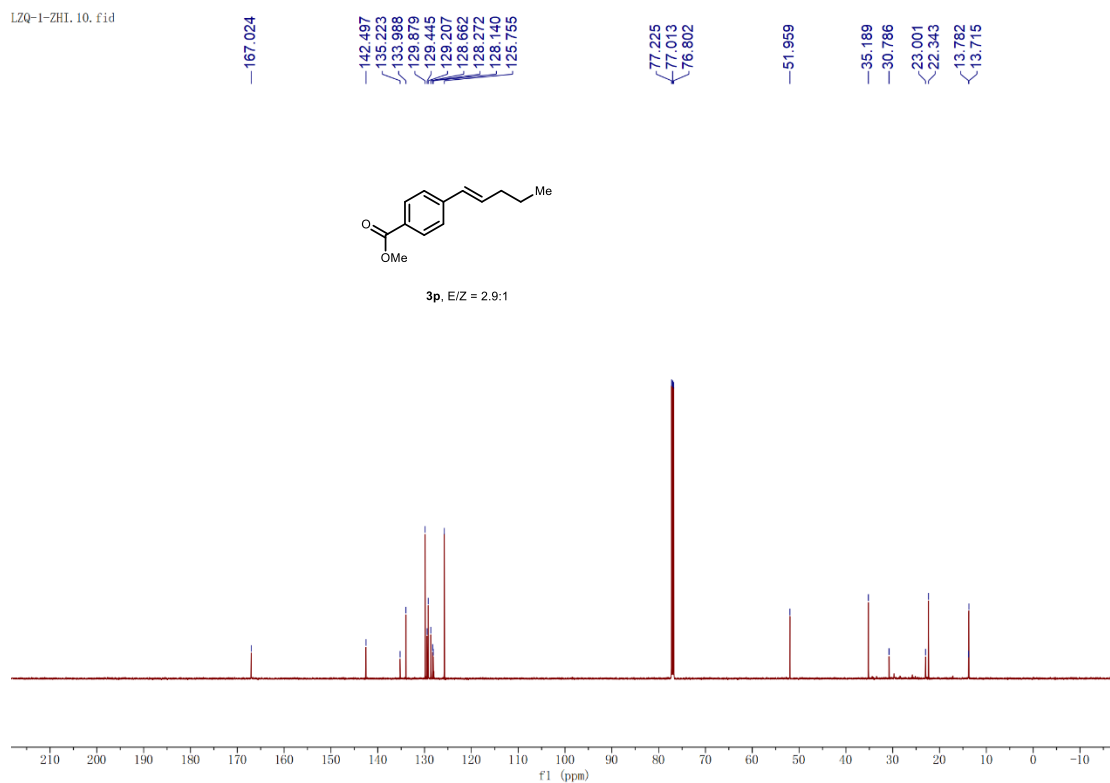

**Figure S41.**  $^{13}\text{C}$  NMR of **3p** (trans/cis mixture,  $\text{CDCl}_3$ , 151 MHz).

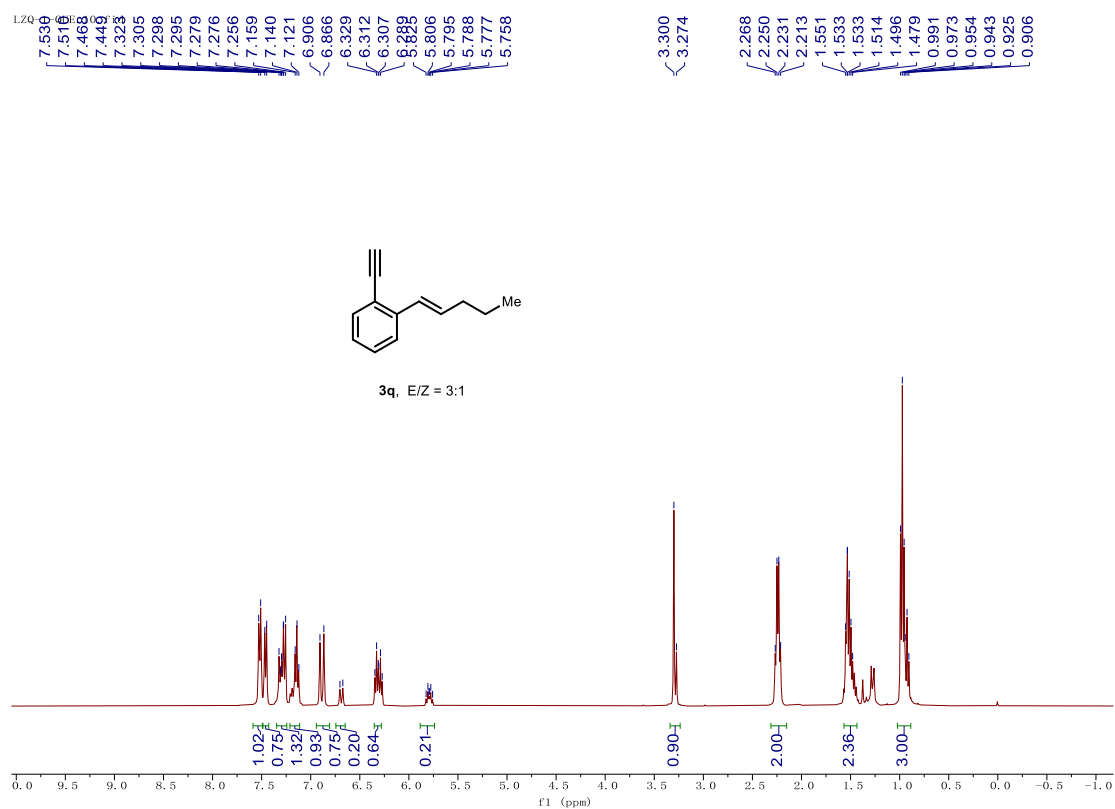

**Figure S42.**  $^1\text{H}$  NMR of **3q** (trans/cis mixture,  $\text{CDCl}_3$ , 400 MHz).

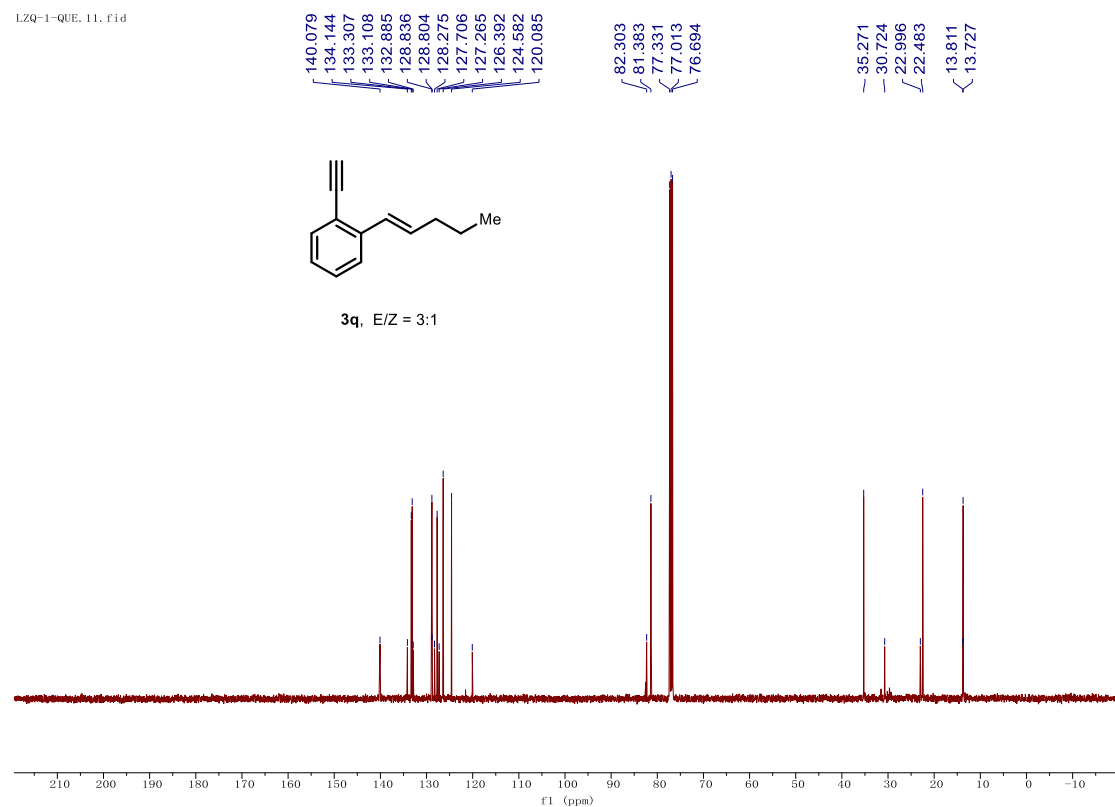

**Figure S43.**  $^{13}\text{C}$  NMR of **3q** (trans/cis mixture,  $\text{CDCl}_3$ , 101 MHz).

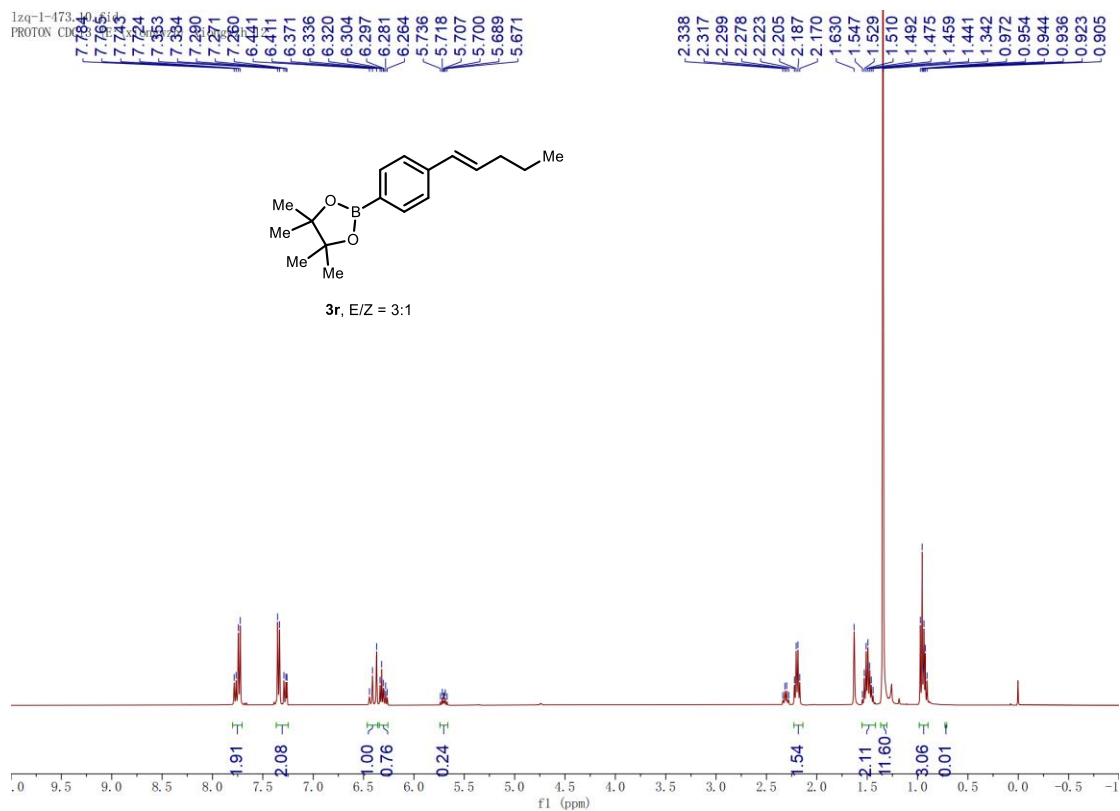

**Figure S44.** <sup>1</sup>H NMR of **3r** (trans/cis mixture, CDCl<sub>3</sub>, 400 MHz).

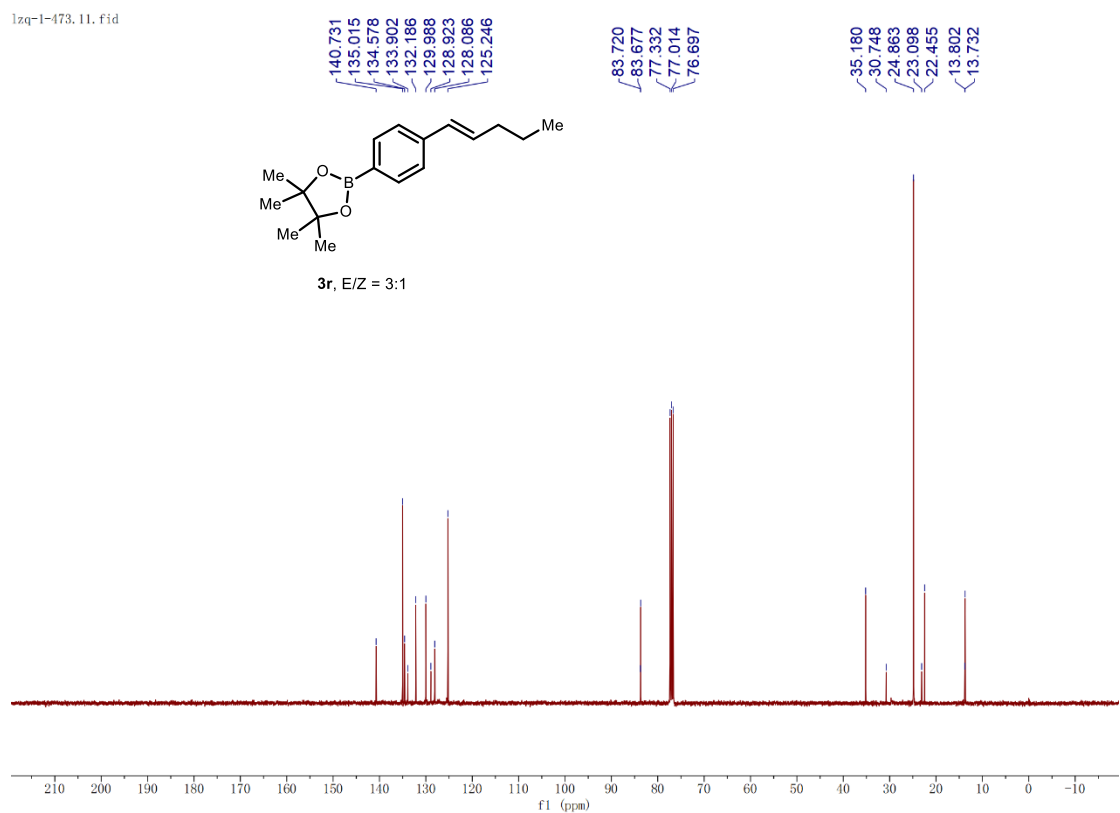

**Figure S45.** <sup>13</sup>C NMR of **3r** (trans/cis mixture, CDCl<sub>3</sub>, 101 MHz).

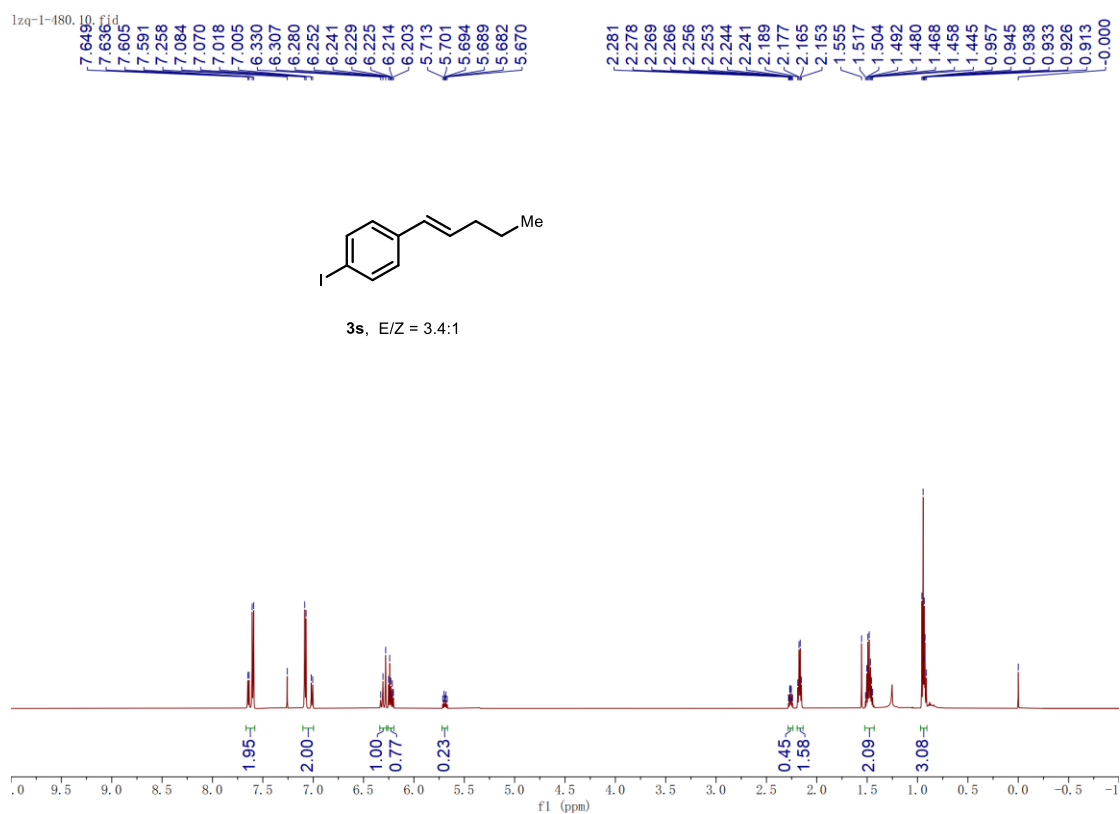

**Figure S46.**  $^1\text{H}$  NMR of **3s** (trans/cis mixture,  $\text{CDCl}_3$ , 600 MHz).

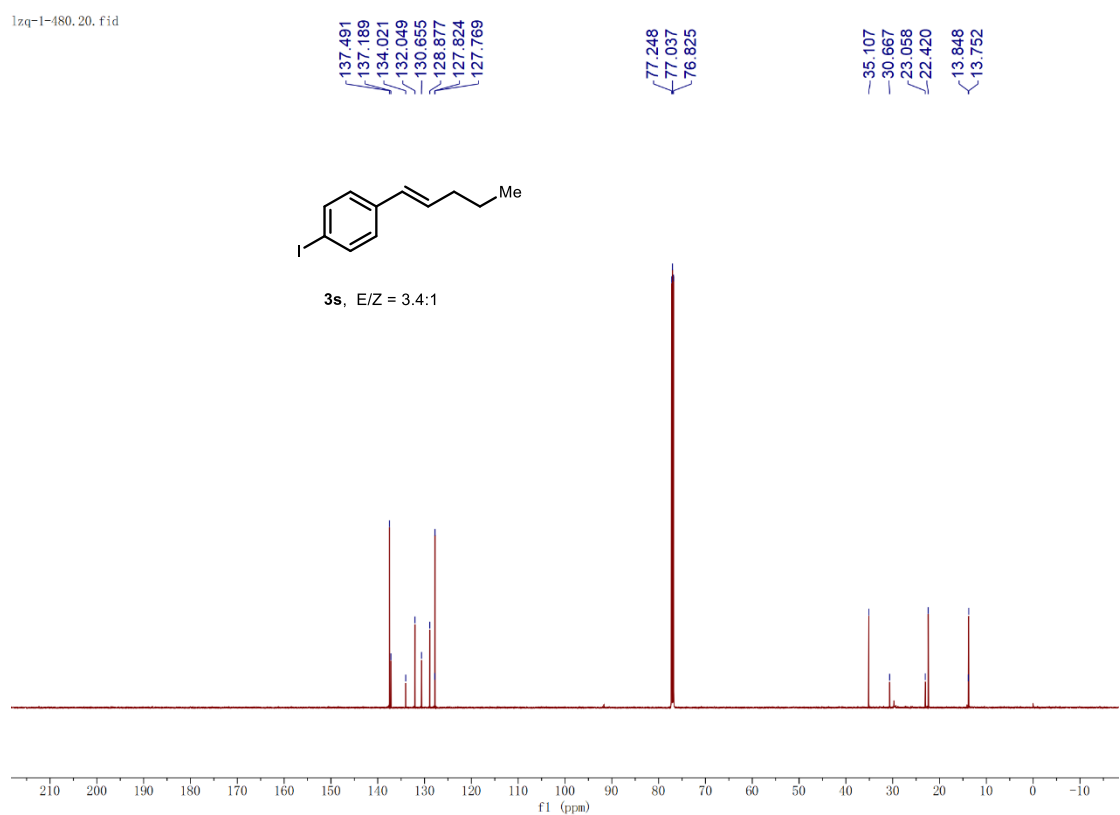

**Figure S47.**  $^{13}\text{C}$  NMR of **3s** (trans/cis mixture,  $\text{CDCl}_3$ , 151 MHz).

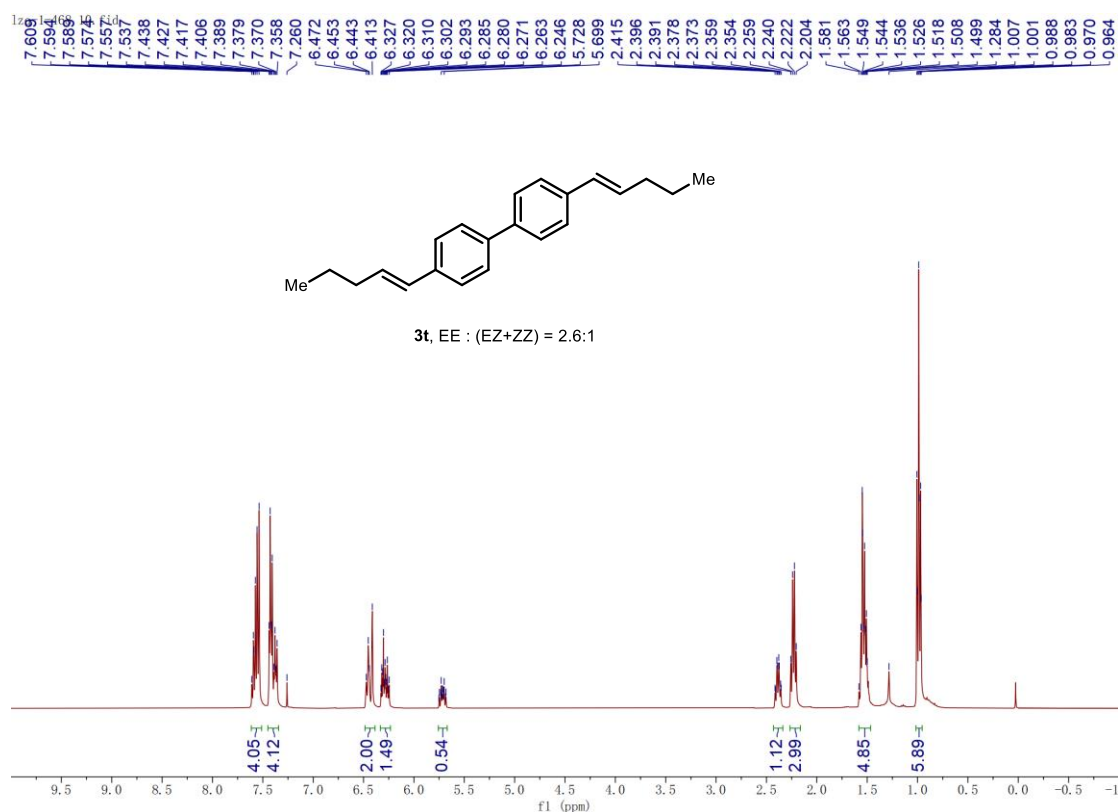

**Figure S48.**  $^1\text{H}$  NMR of **3t** (trans/cis mixture,  $\text{CDCl}_3$ , 400 MHz).

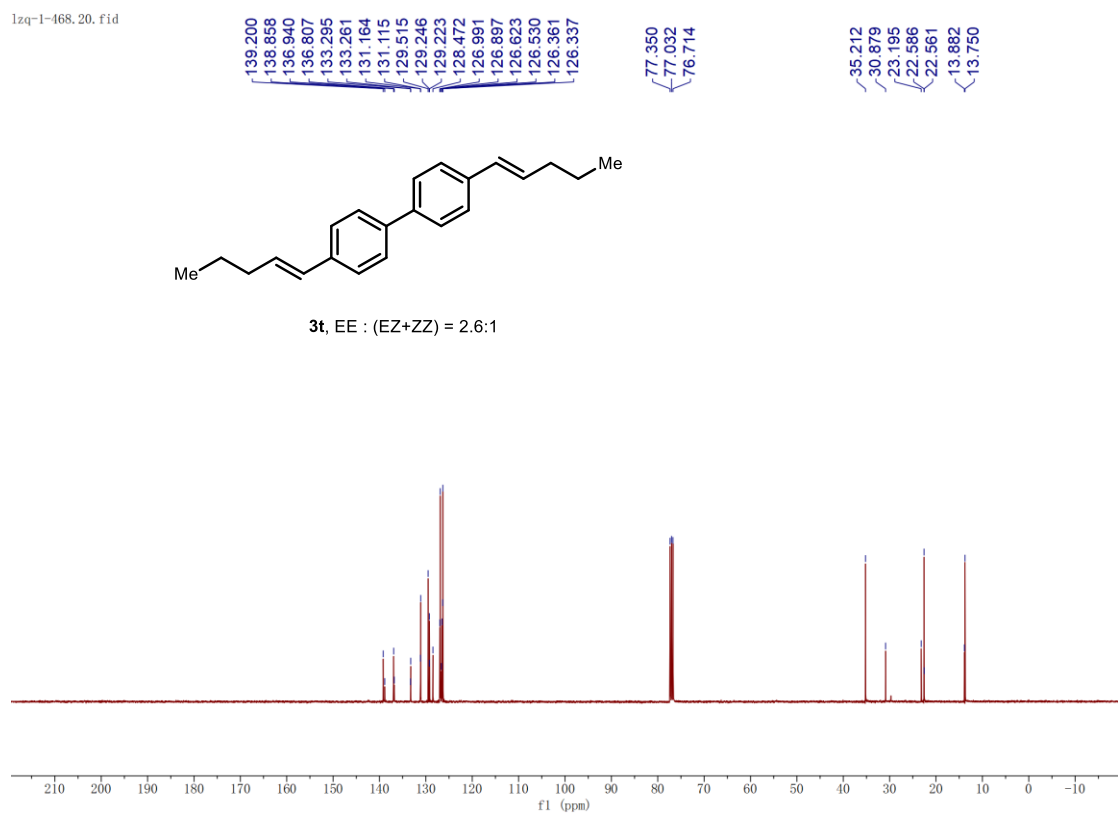

**Figure S49.**  $^{13}\text{C}$  NMR of **3t** (trans/cis mixture,  $\text{CDCl}_3$ , 101 MHz).

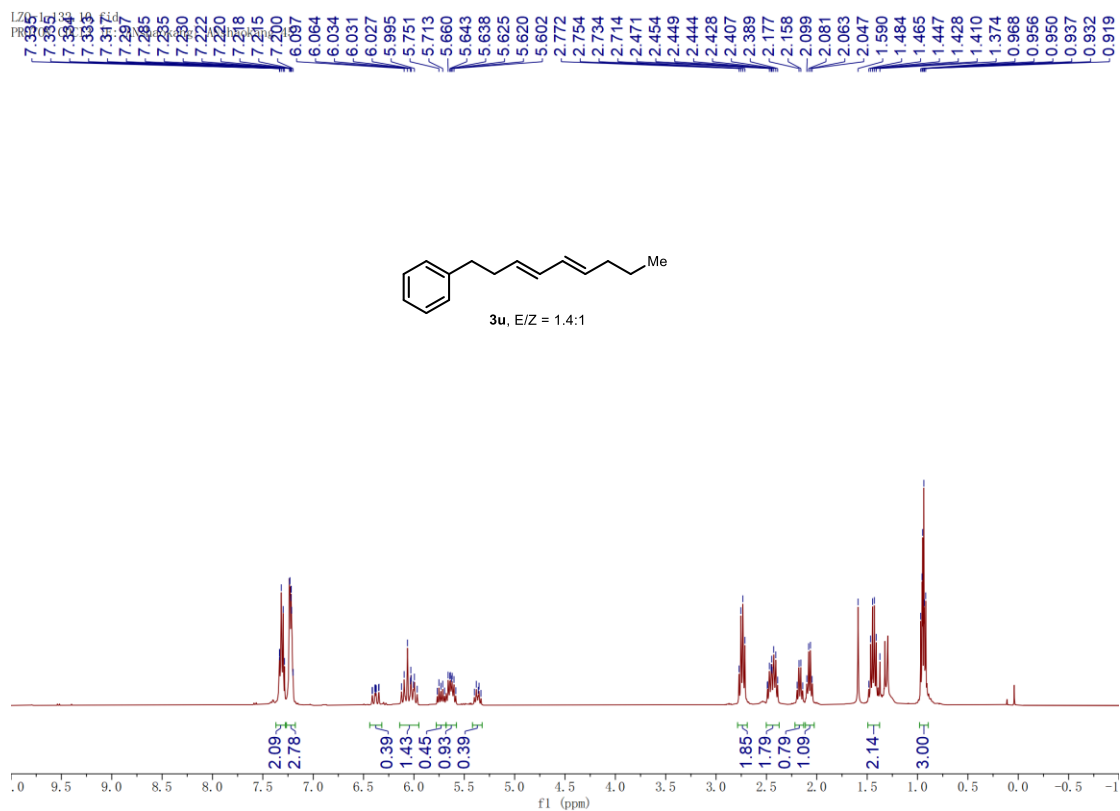

**Figure S50.**  $^1\text{H}$  NMR of **3u** (trans/cis mixture,  $\text{CDCl}_3$ , 400 MHz).

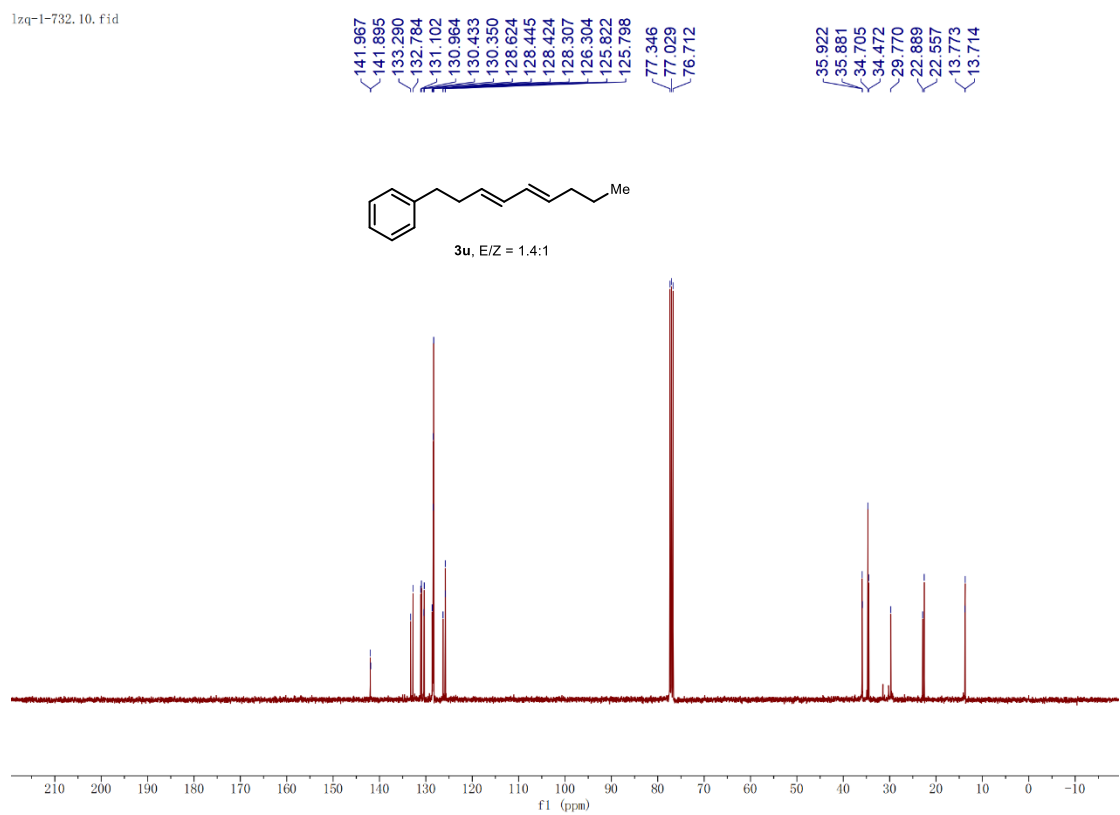

**Figure S51.**  $^{13}\text{C}$  NMR of **3u** (trans/cis mixture,  $\text{CDCl}_3$ , 101 MHz).

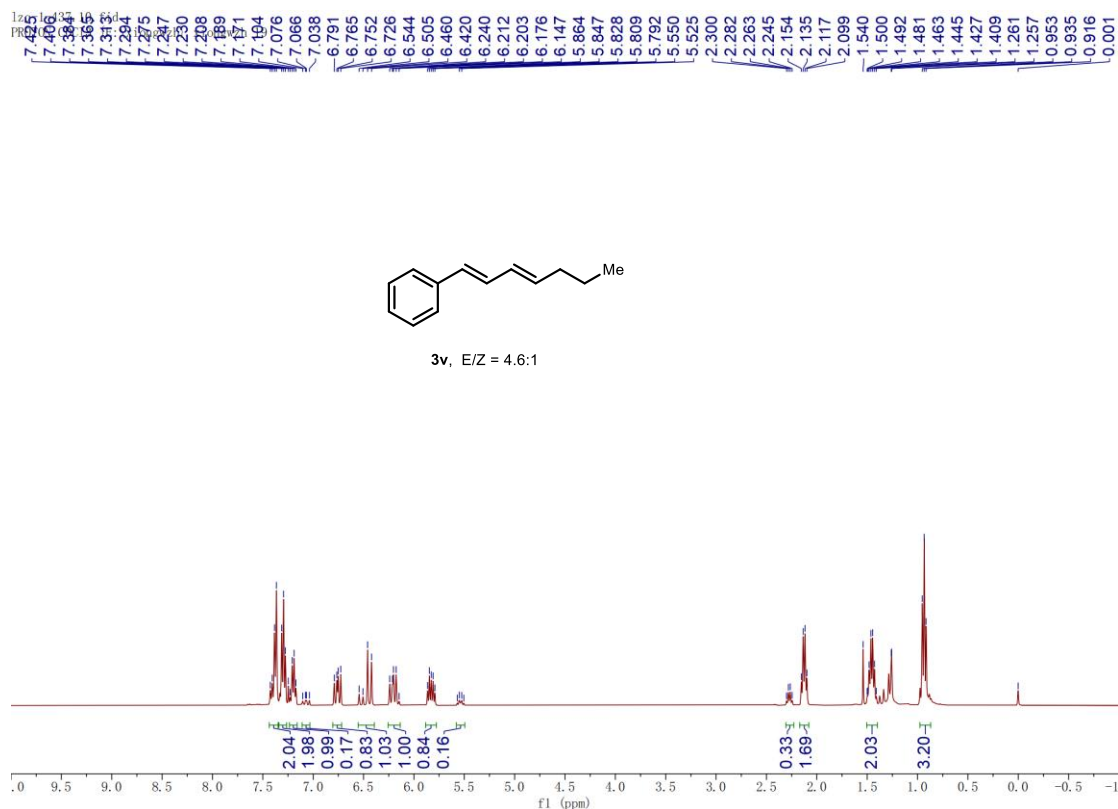

**Figure S52.**  $^1\text{H}$  NMR of **3v** (trans/cis mixture,  $\text{CDCl}_3$ , 400 MHz).

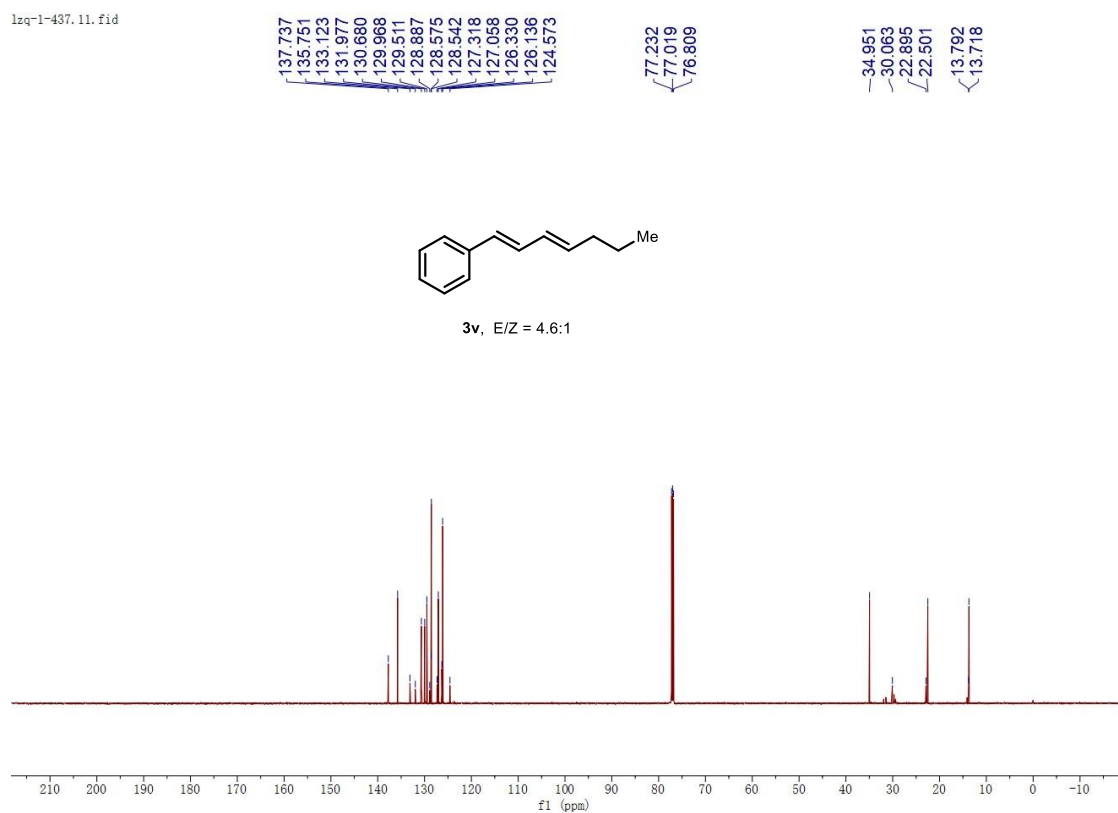

**Figure S53.**  $^{13}\text{C}$  NMR of **3v** (trans/cis mixture,  $\text{CDCl}_3$ , 151 MHz).

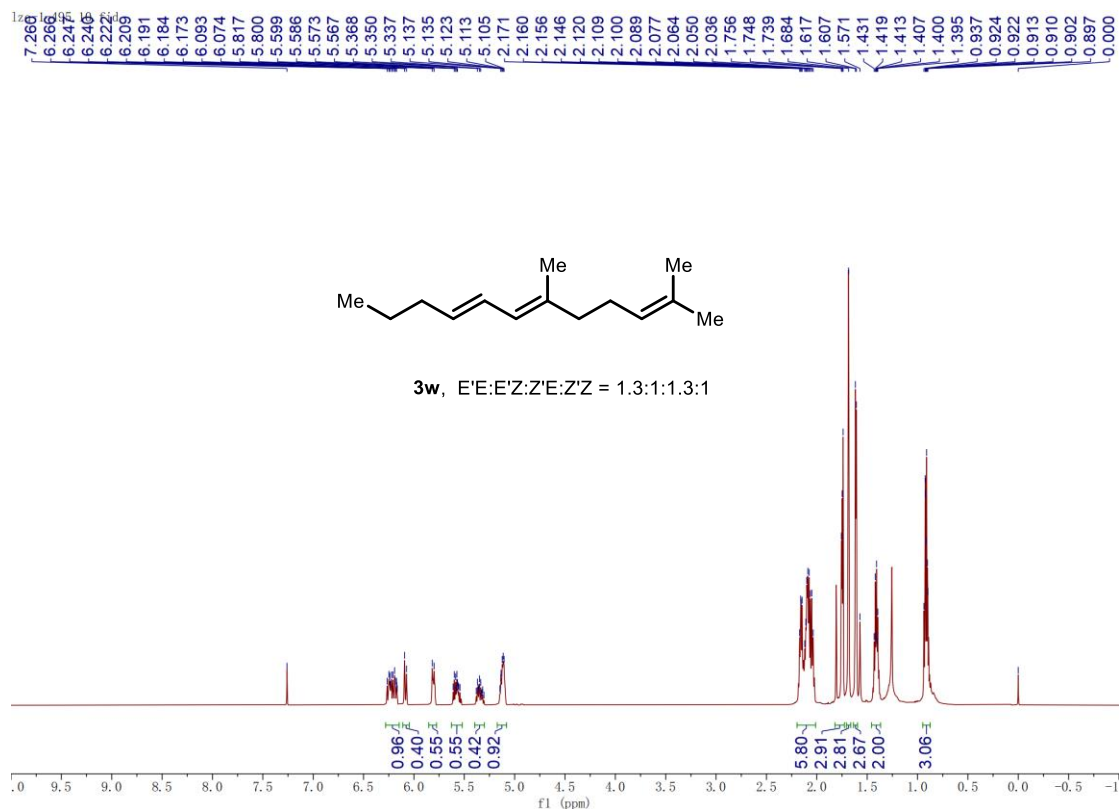

**Figure S54.** <sup>1</sup>H NMR of **3w** (trans/cis mixture, CDCl<sub>3</sub>, 600 MHz)

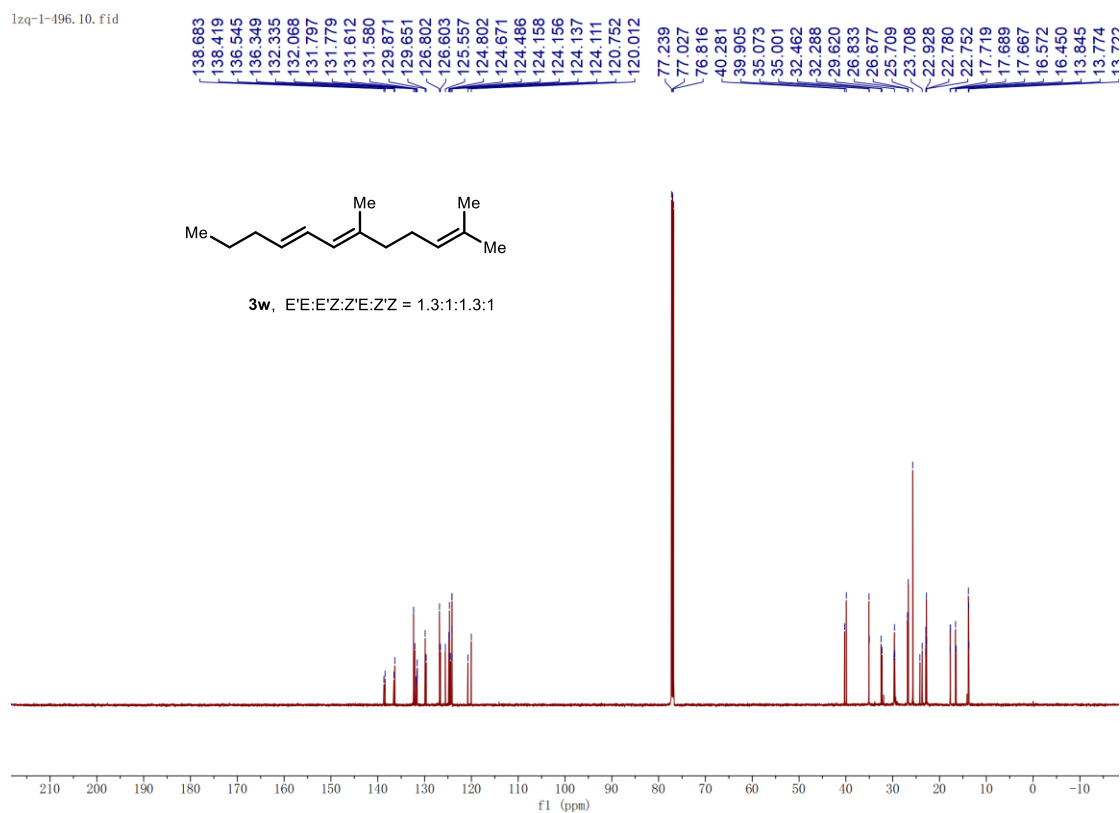

**Figure S55.** <sup>13</sup>C NMR of **3w** (trans/cis mixture, CDCl<sub>3</sub>, 151 MHz).



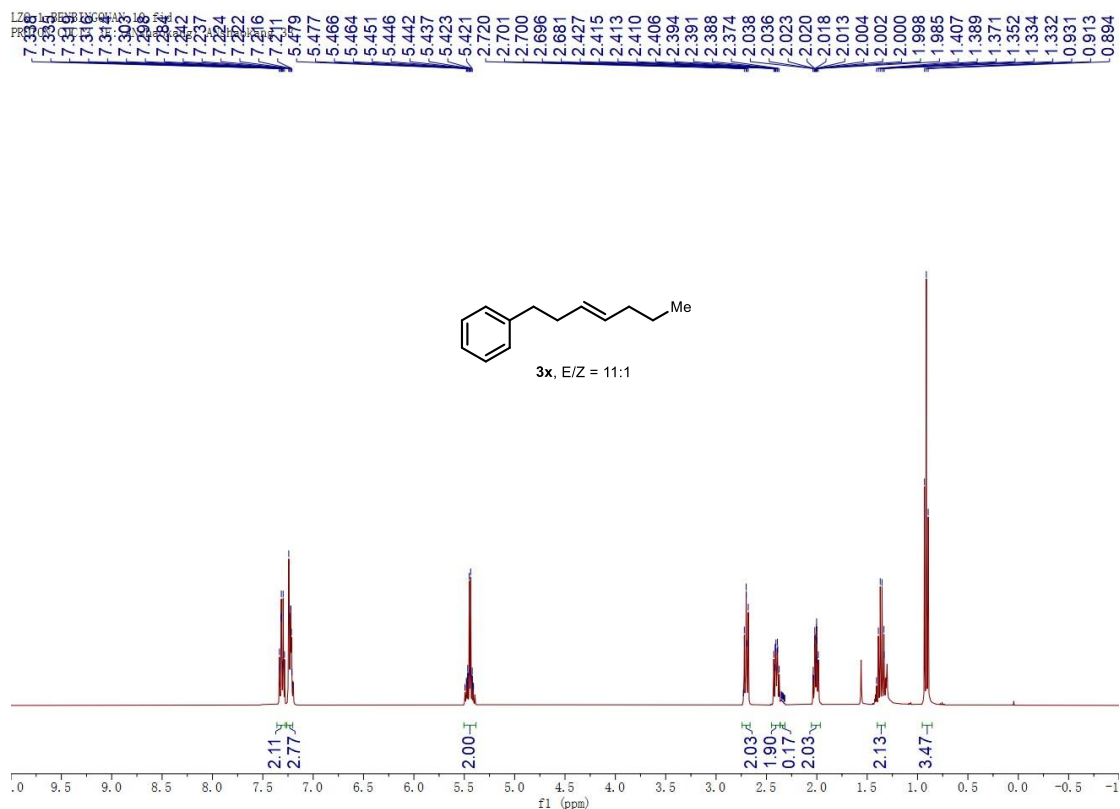

**Figure S56.** <sup>1</sup>H NMR of **3x** (trans/cis mixture, CDCl<sub>3</sub>, 400 MHz).

l2q-1-benbinguan.20.fid

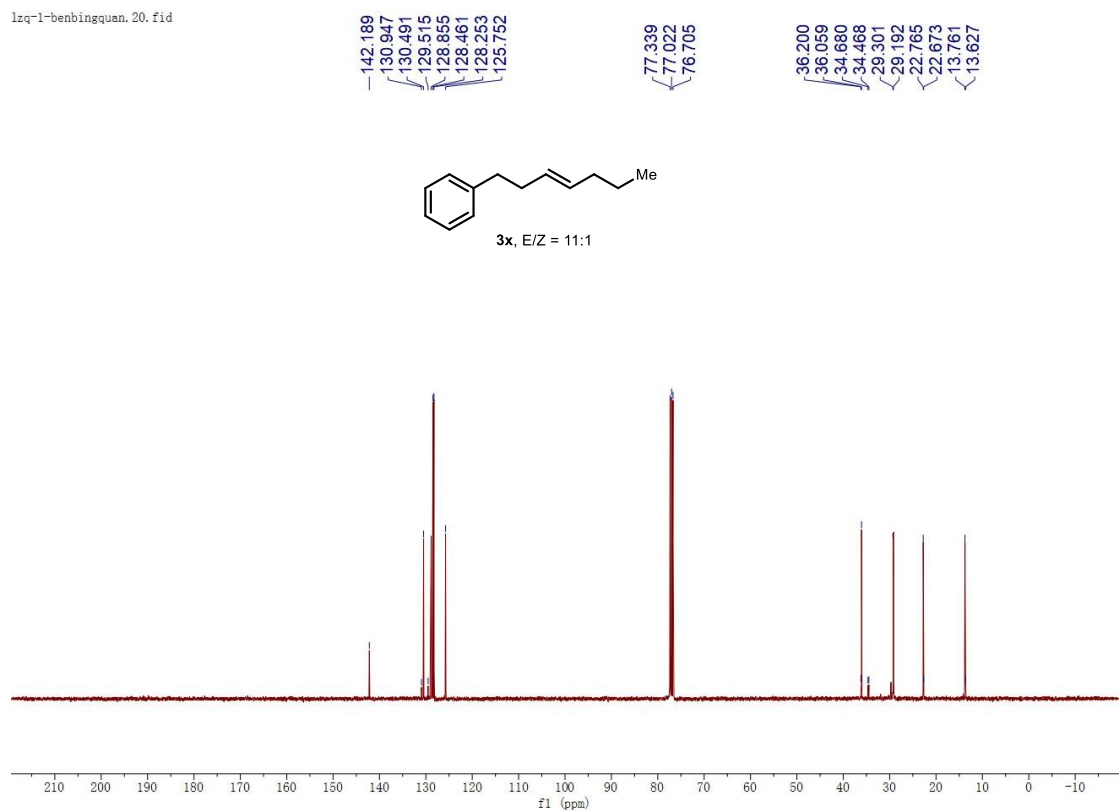

**Figure S57.** <sup>13</sup>C NMR of **3x** (trans/cis mixture, CDCl<sub>3</sub>, 101 MHz).

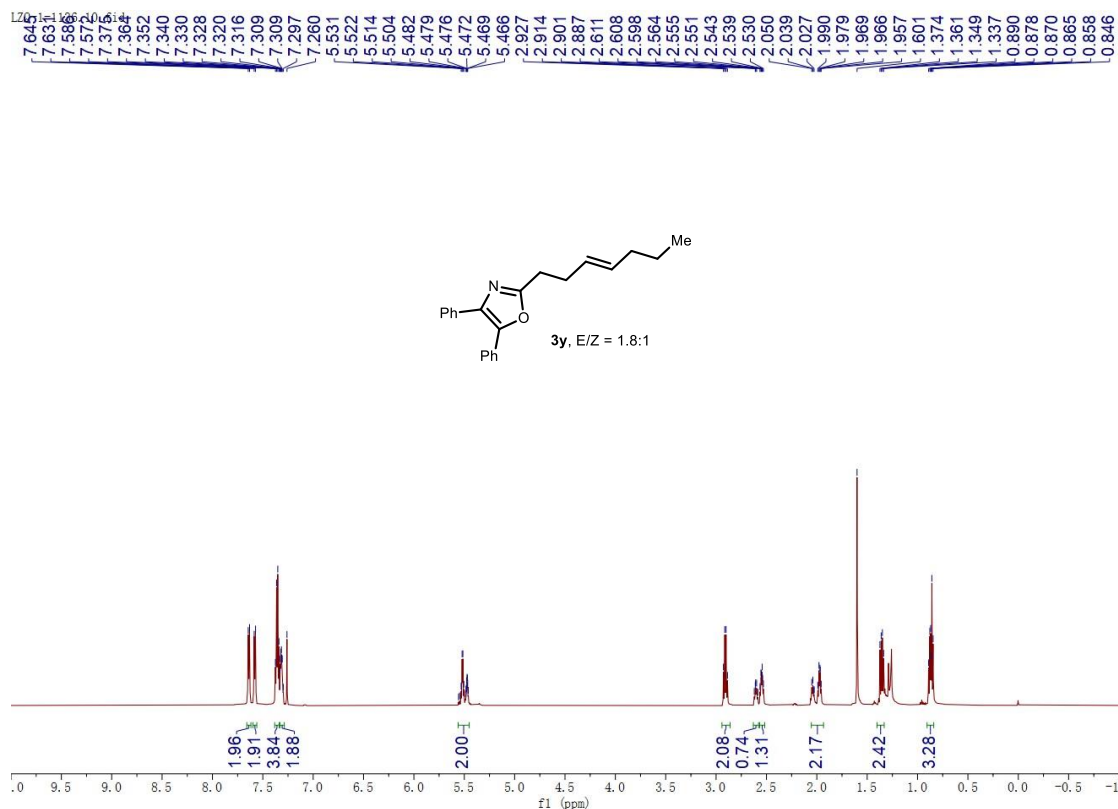

**Figure S58.** <sup>1</sup>H NMR of **3y** (trans/cis mixture, CDCl<sub>3</sub>, 600 MHz).

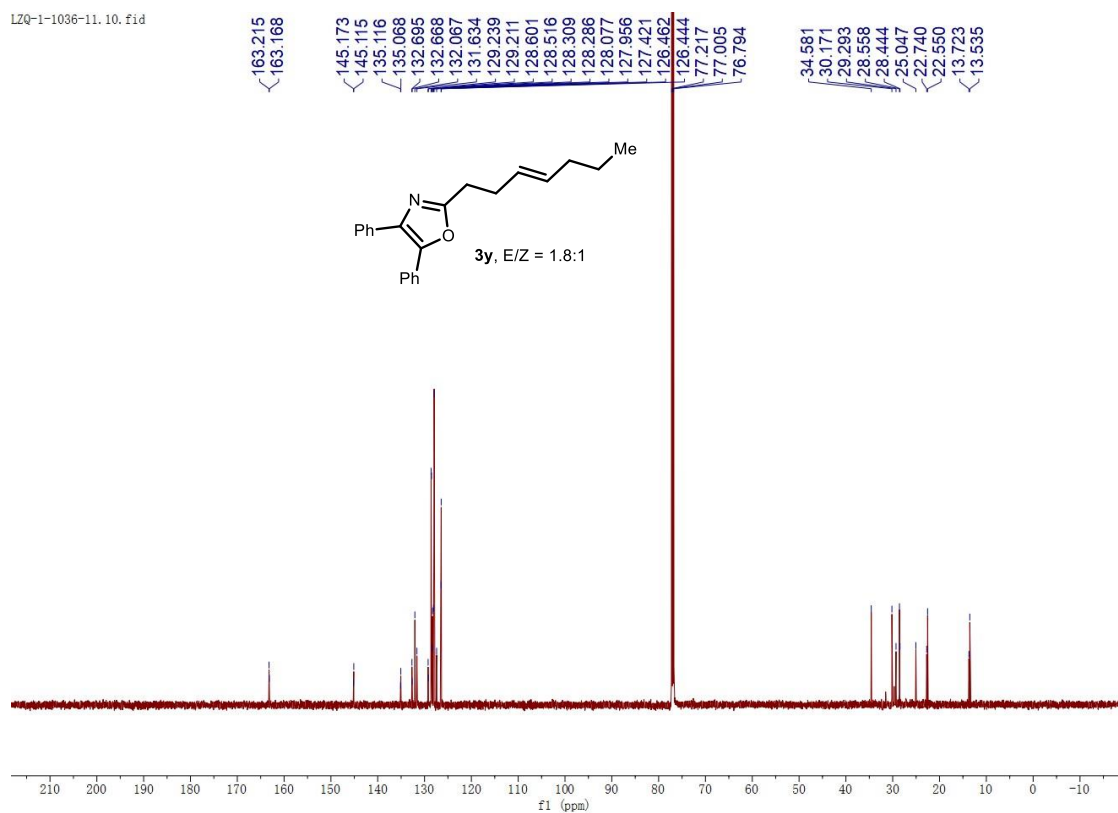

**Figure S59.** <sup>13</sup>C NMR of **3y** (trans/cis mixture, CDCl<sub>3</sub>, 151 MHz).

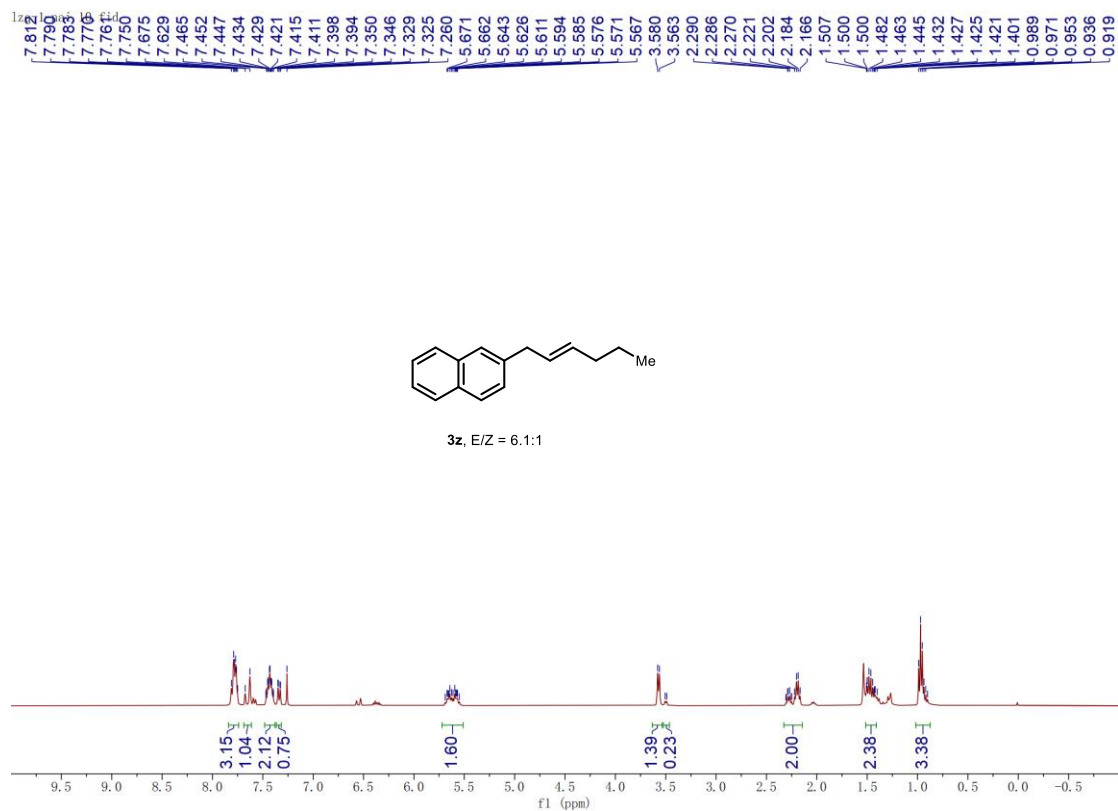

**Figure S60.** <sup>1</sup>H NMR of **3z** (trans/cis mixture, CDCl<sub>3</sub>, 400 MHz).

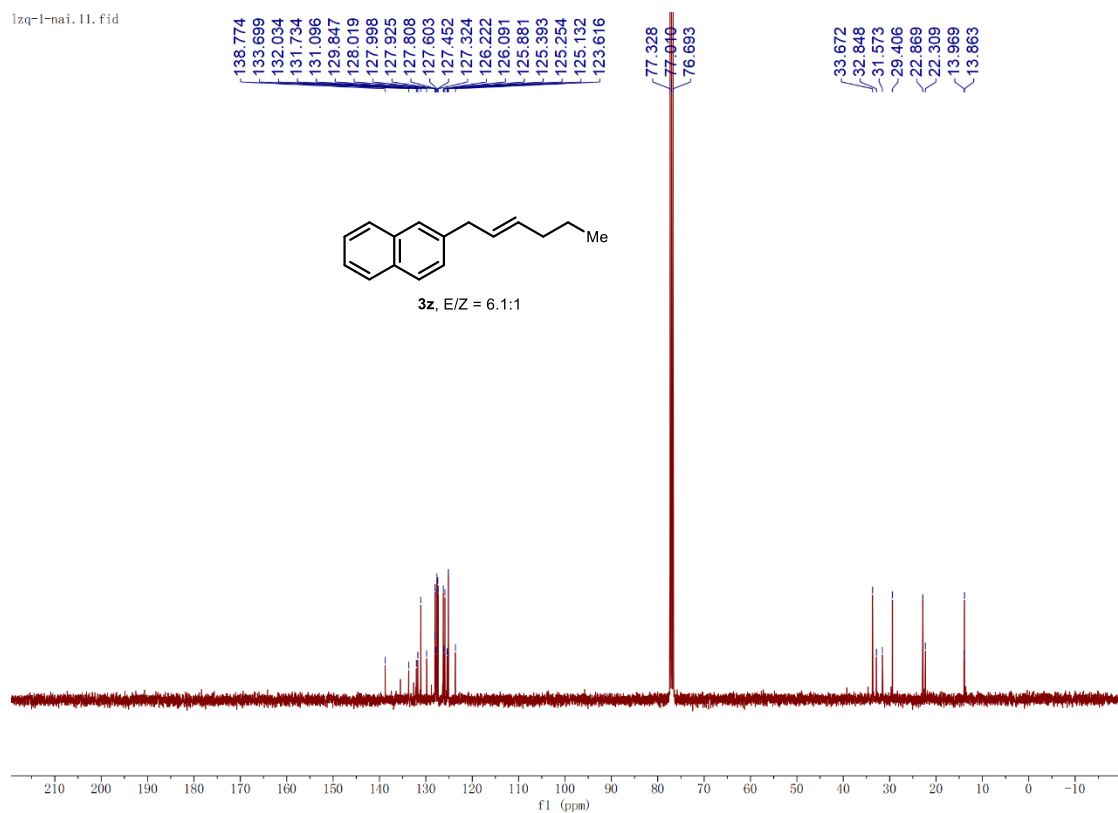

**Figure S61.** <sup>13</sup>C NMR of **3z** (trans/cis mixture, CDCl<sub>3</sub>, 101 MHz).

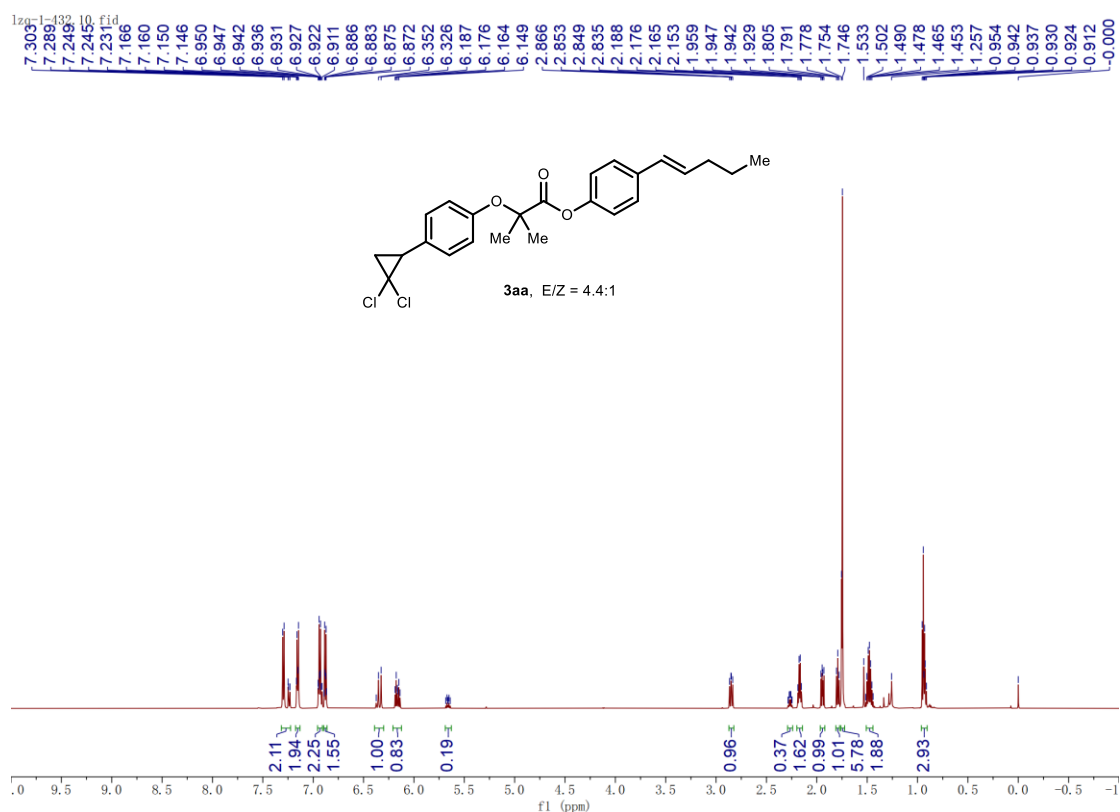

**Figure S62.** <sup>1</sup>H NMR of **3aa** (trans/cis mixture, CDCl<sub>3</sub>, 600 MHz).

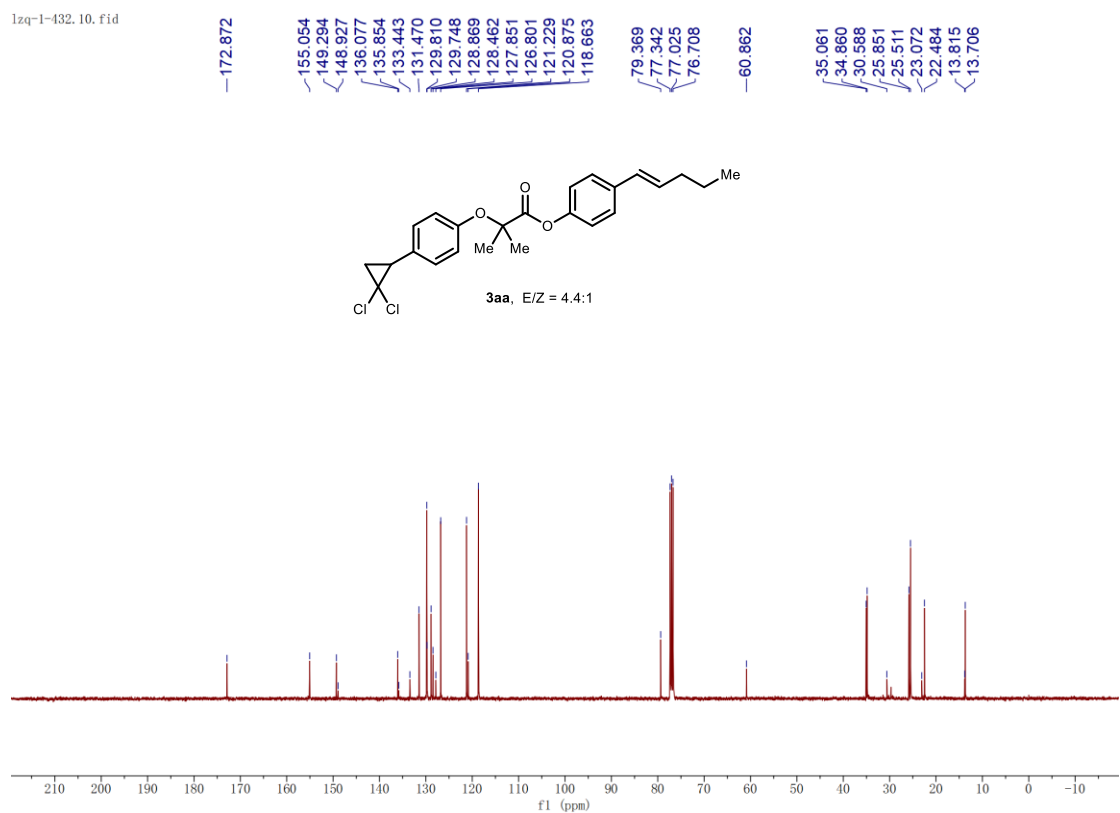

**Figure S63.** <sup>13</sup>C NMR of **3aa** (trans/cis mixture, CDCl<sub>3</sub>, 101 MHz).

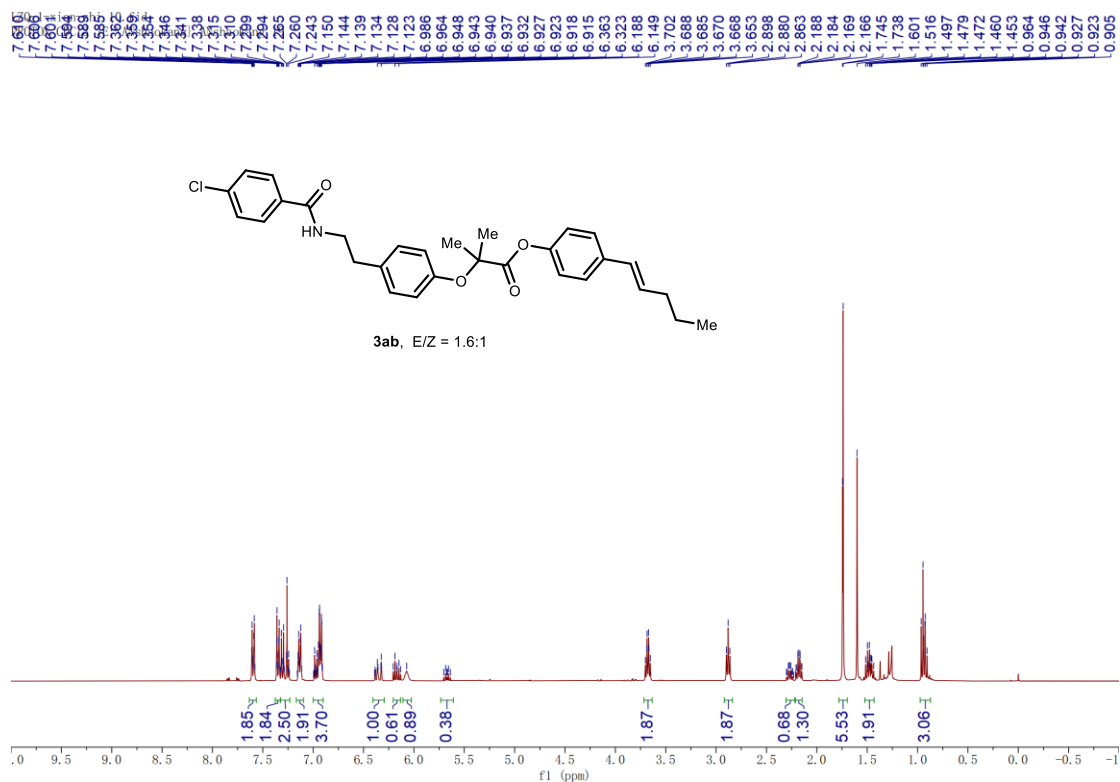

**Figure S64.** <sup>1</sup>H NMR of **3ab** (trans/cis mixture, CDCl<sub>3</sub>, 600 MHz).

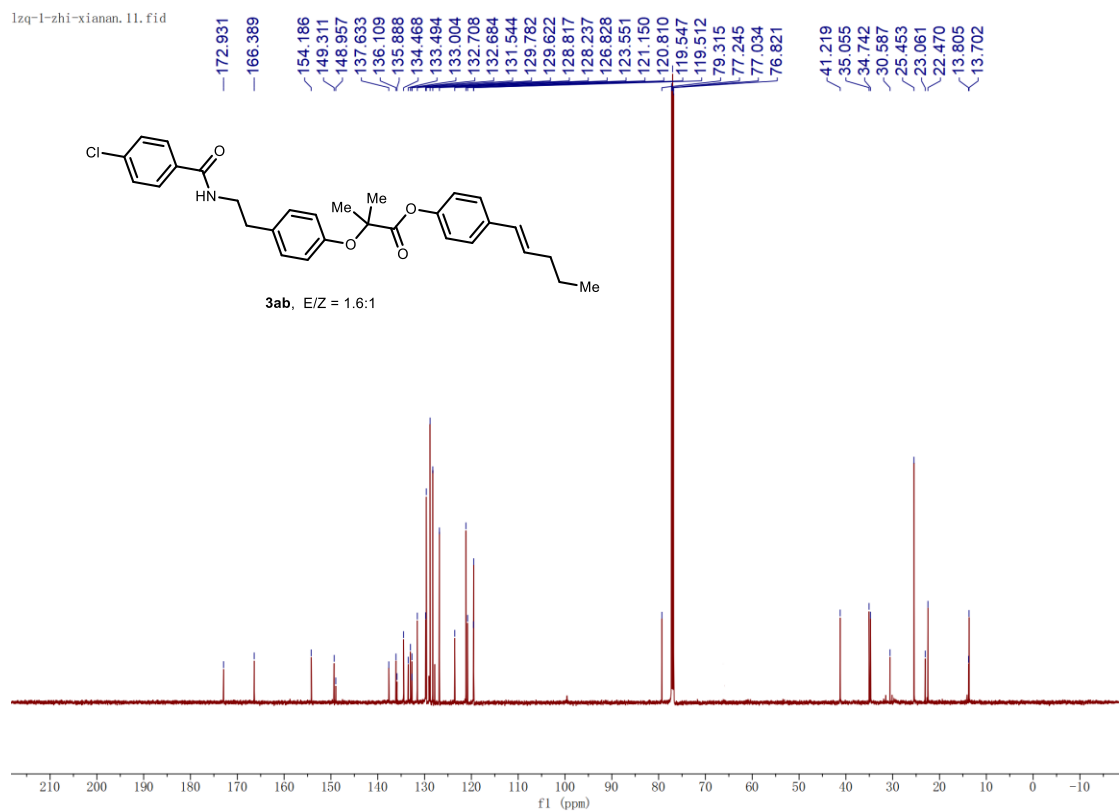

**Figure S65.** <sup>13</sup>C NMR of **3ab** (trans/cis mixture, CDCl<sub>3</sub>, 151 MHz).

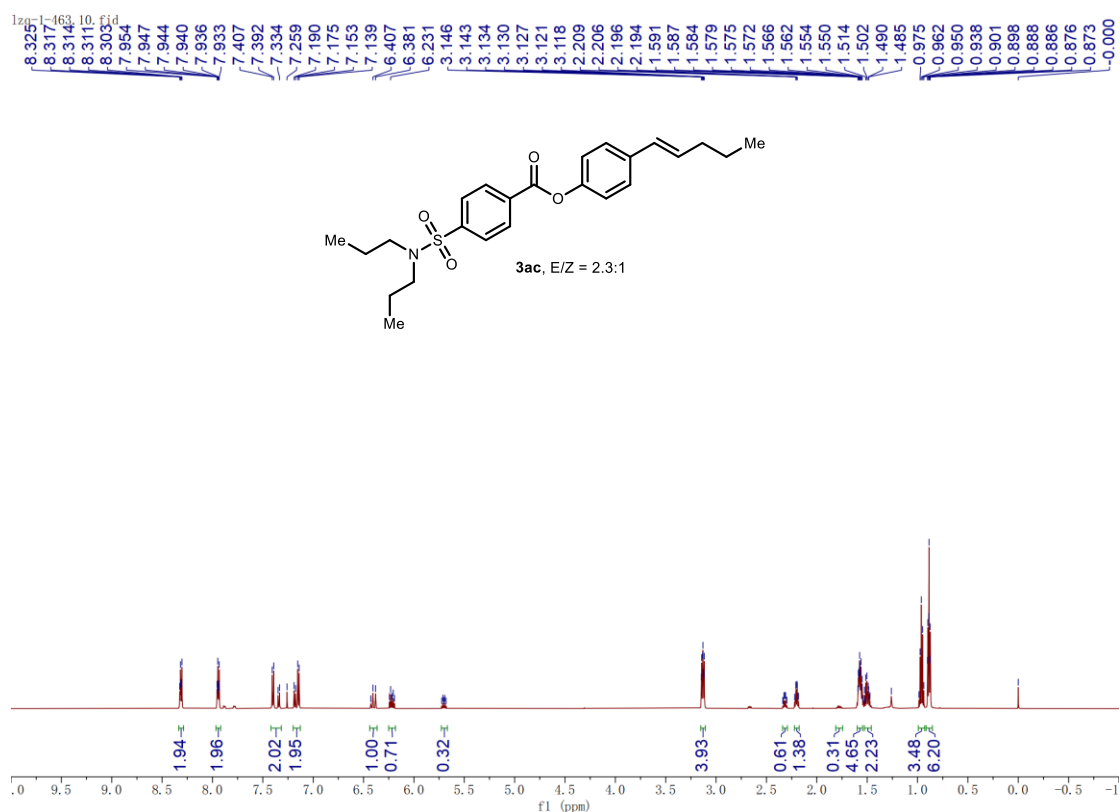

**Figure S66.** <sup>1</sup>H NMR of **3ac** (trans/cis mixture, CDCl<sub>3</sub>, 600 MHz).

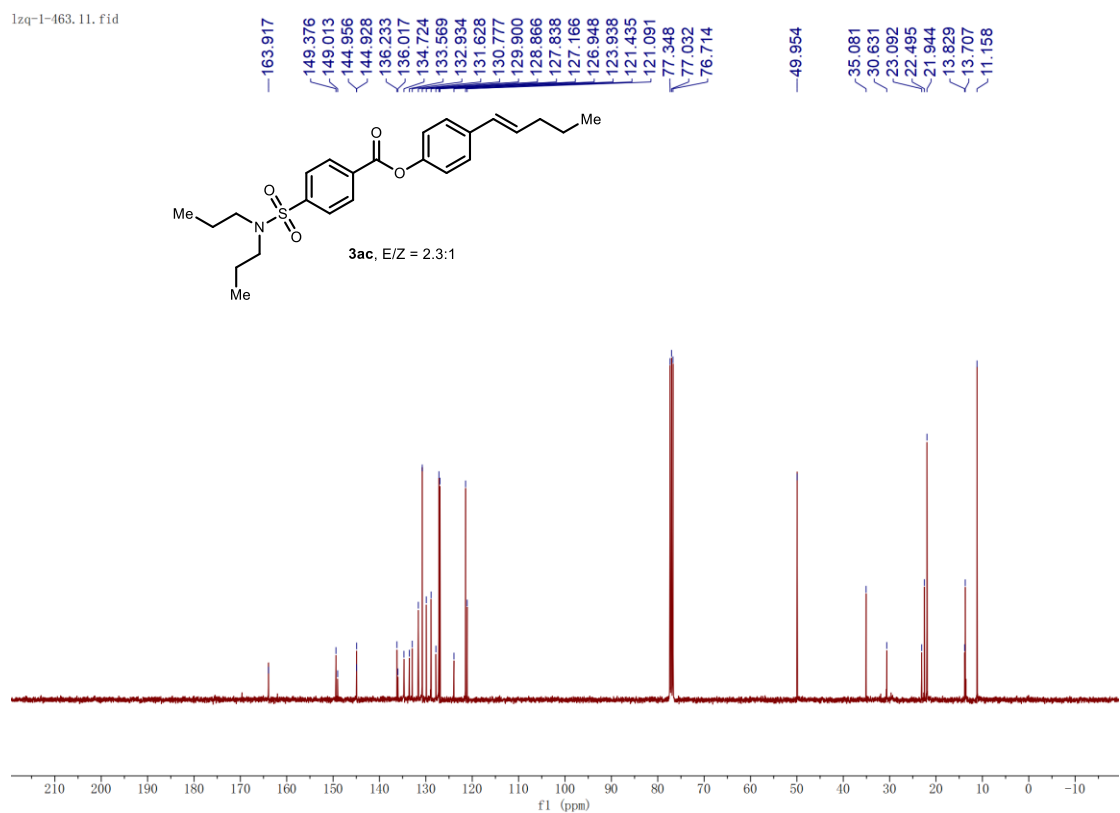

**Figure S67.** <sup>13</sup>C NMR of **3ac** (trans/cis mixture, CDCl<sub>3</sub>, 101 MHz).

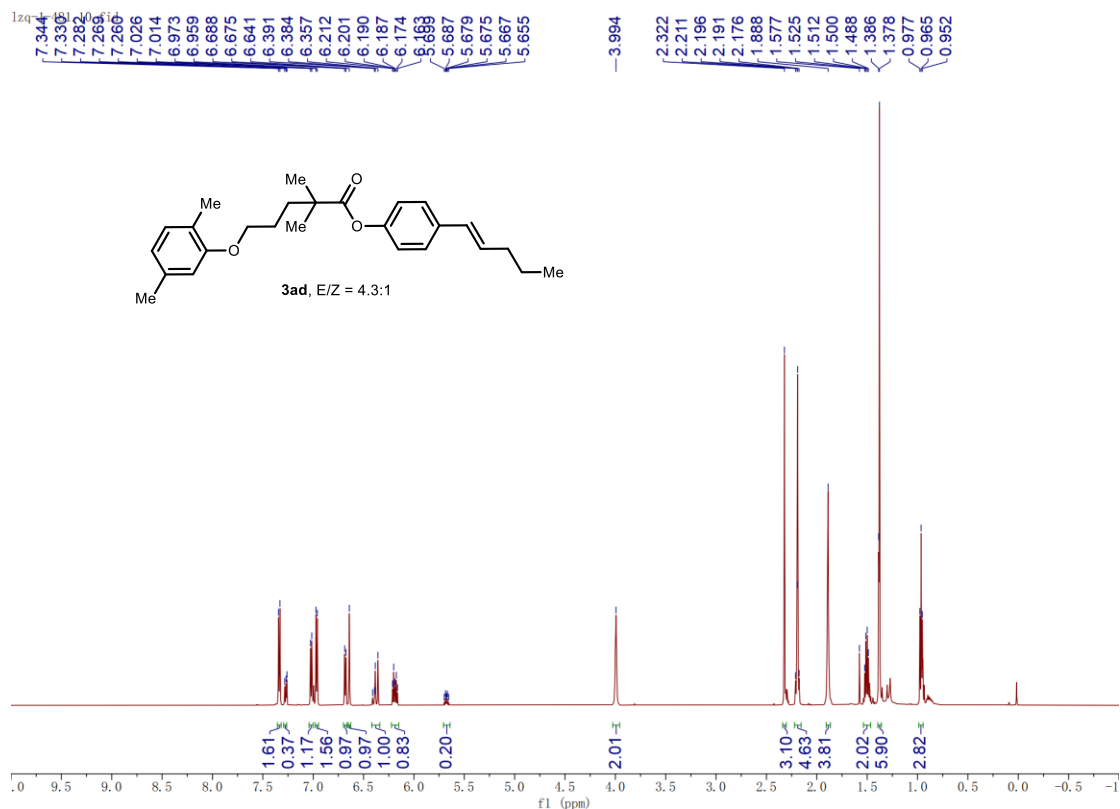

**Figure S68.** <sup>1</sup>H NMR of **3ad** (trans/cis mixture, CDCl<sub>3</sub>, 600 MHz)

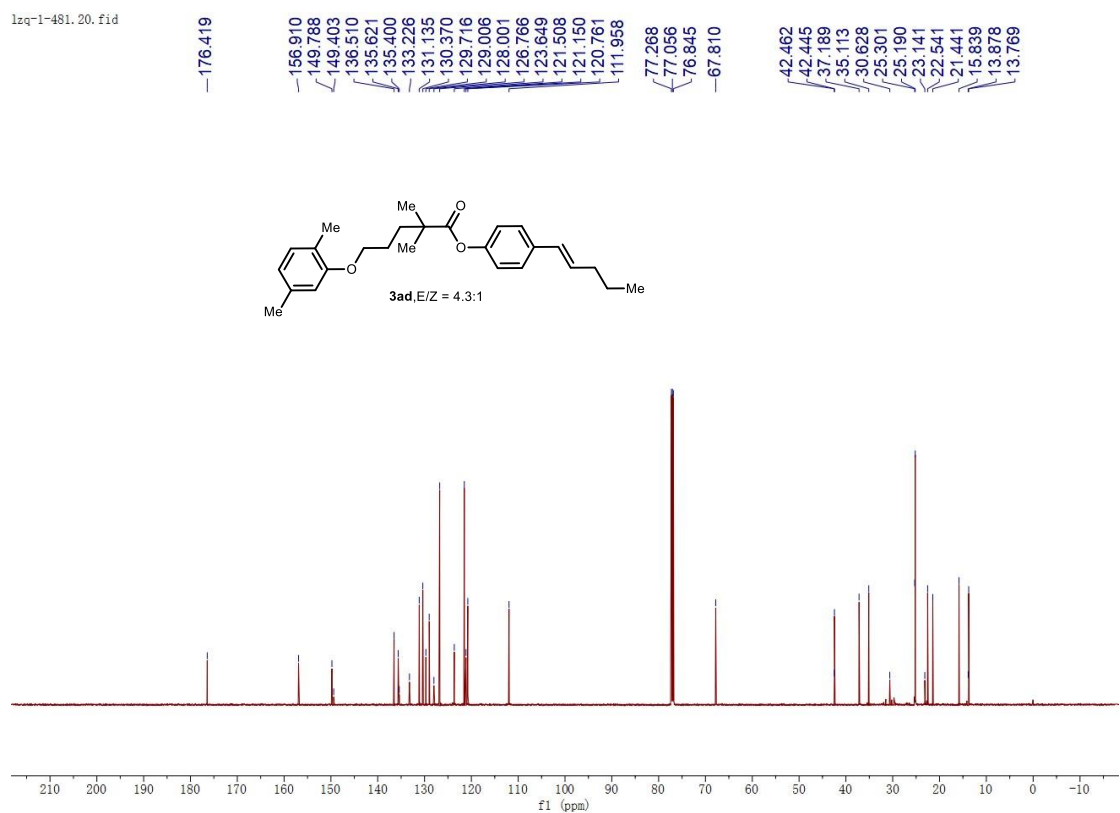

**Figure S69.** <sup>13</sup>C NMR of **3ad** (trans/cis mixture, CDCl<sub>3</sub>, 151 MHz).

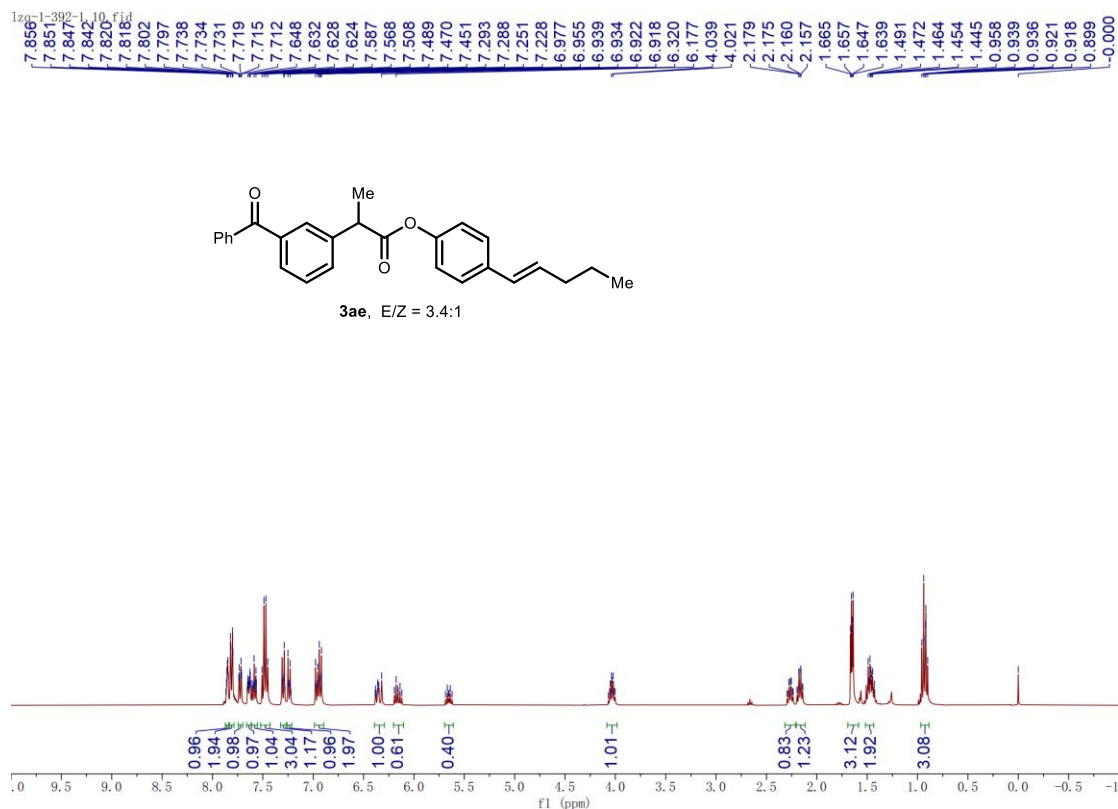

**Figure S70.**  $^1\text{H}$  NMR of **3ae** (trans/cis mixture,  $\text{CDCl}_3$ , 400 MHz).

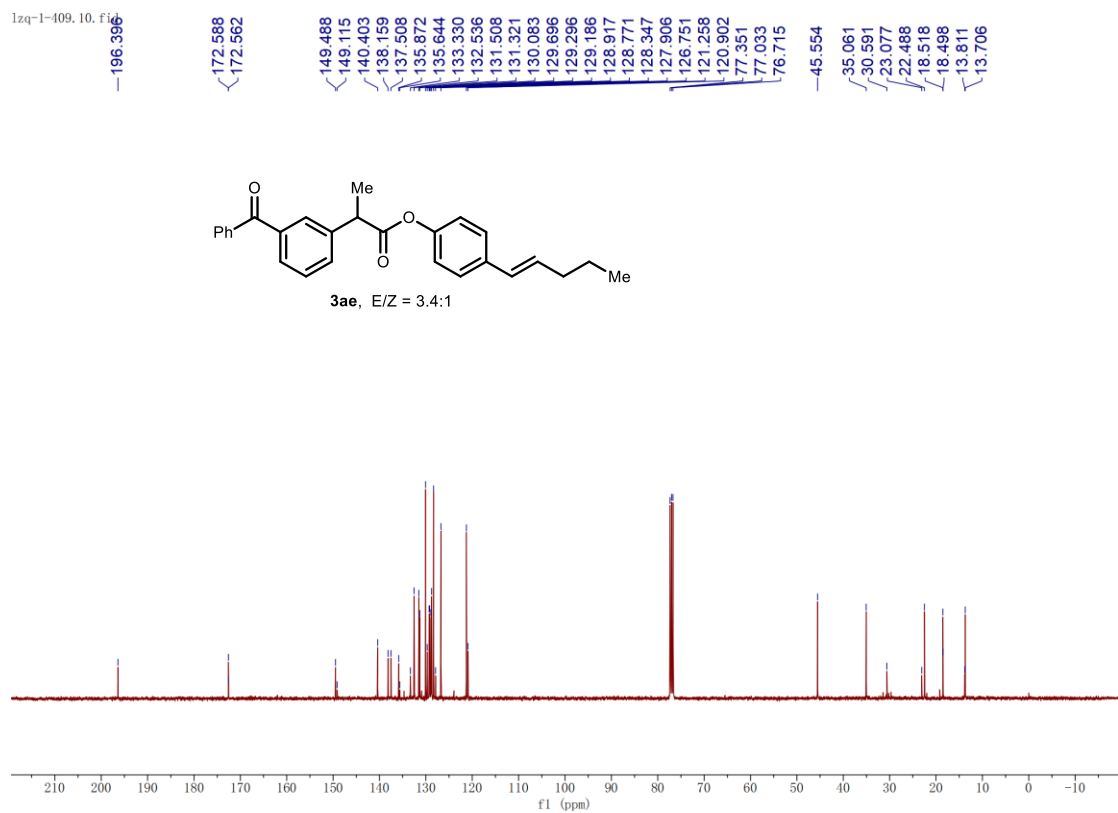

**Figure S71.**  $^{13}\text{C}$  NMR of **3ae** (trans/cis mixture,  $\text{CDCl}_3$ , 101 MHz).



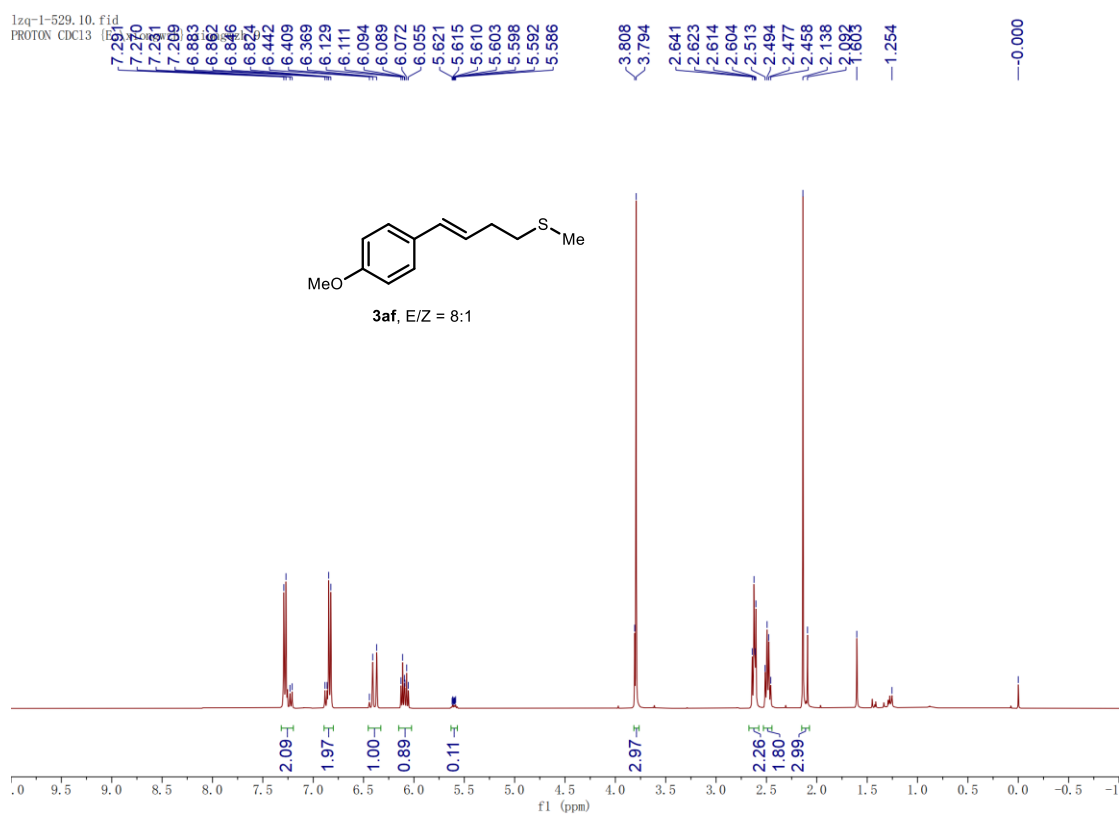

**Figure S72.** <sup>1</sup>H NMR of **3af** (trans/cis mixture, CDCl<sub>3</sub>, 400 MHz)

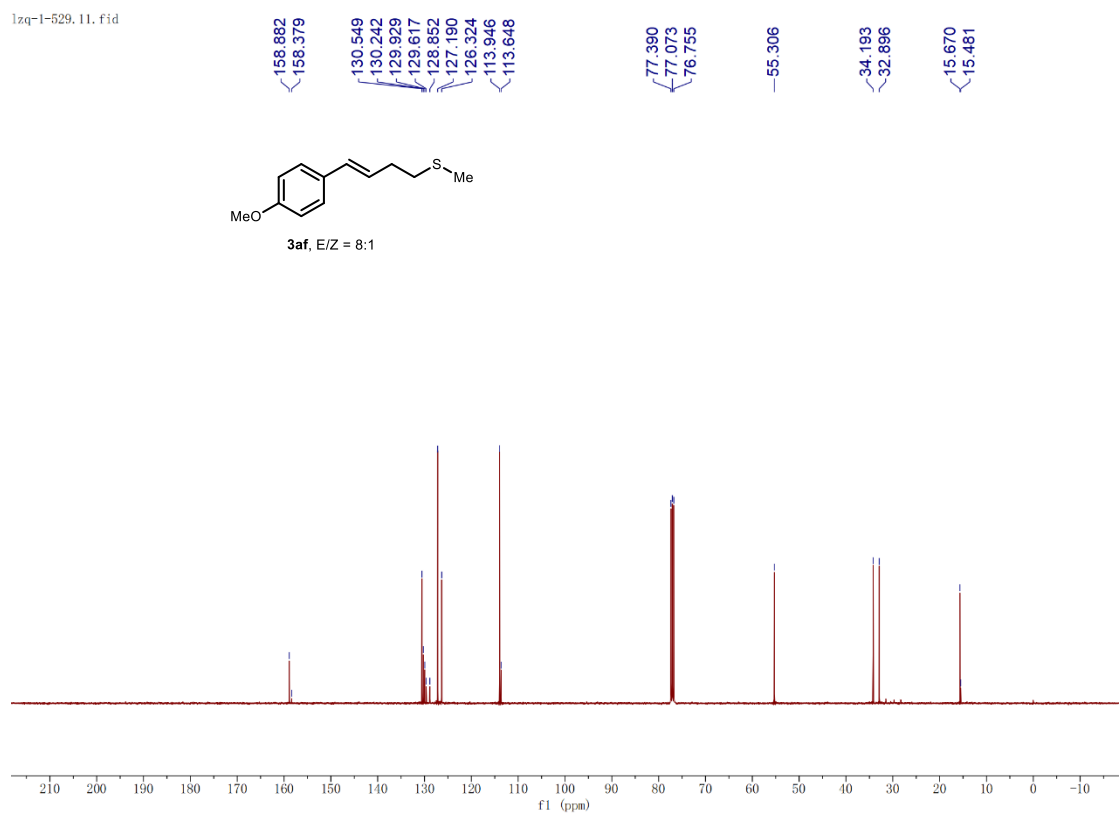

**Figure S73.** <sup>13</sup>C NMR of **3af** (trans/cis mixture, CDCl<sub>3</sub>, 101 MHz).

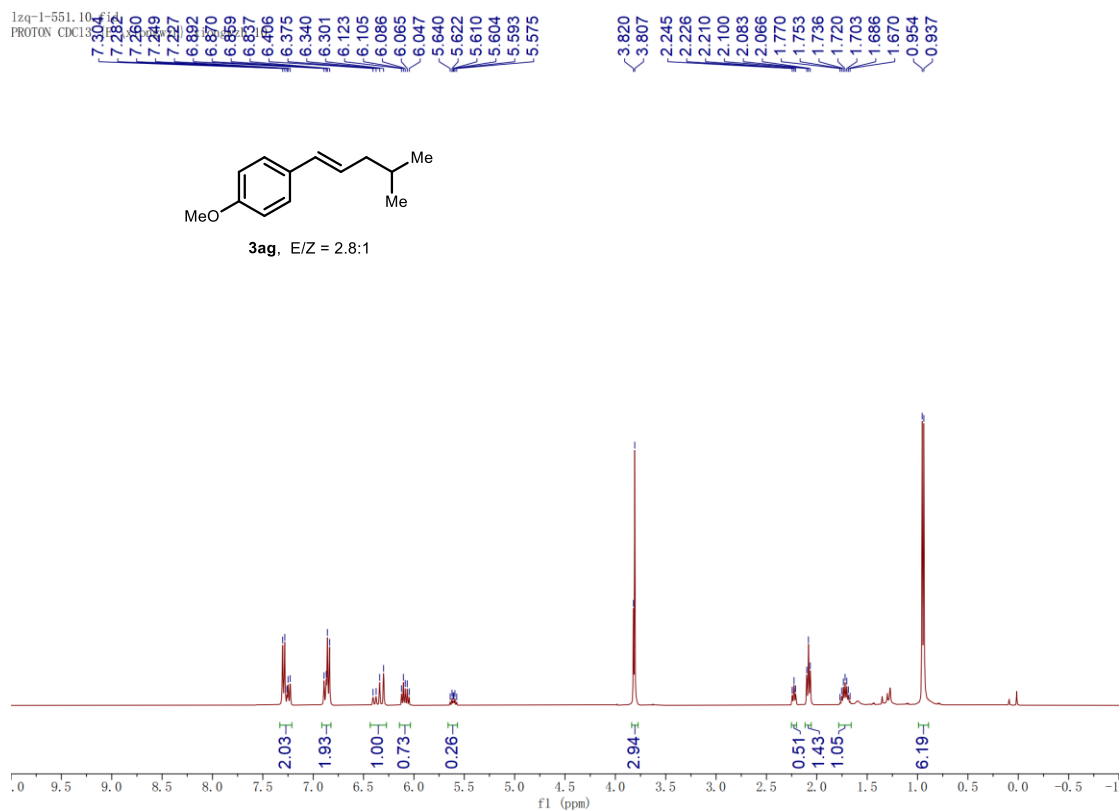

**Figure S74.** <sup>1</sup>H NMR of **3ag** (trans/cis mixture, CDCl<sub>3</sub>, 400 MHz)

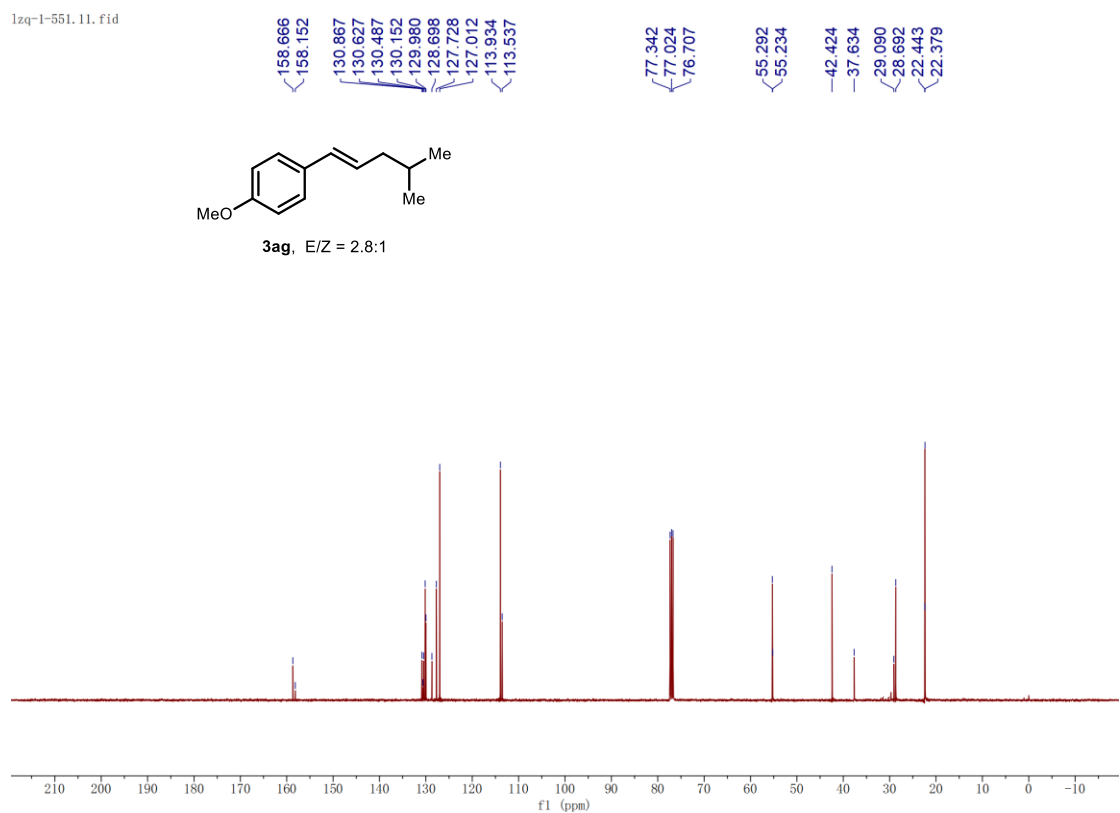

**Figure S75.** <sup>13</sup>C NMR of **3ag** (trans/cis mixture, CDCl<sub>3</sub>, 101 MHz).

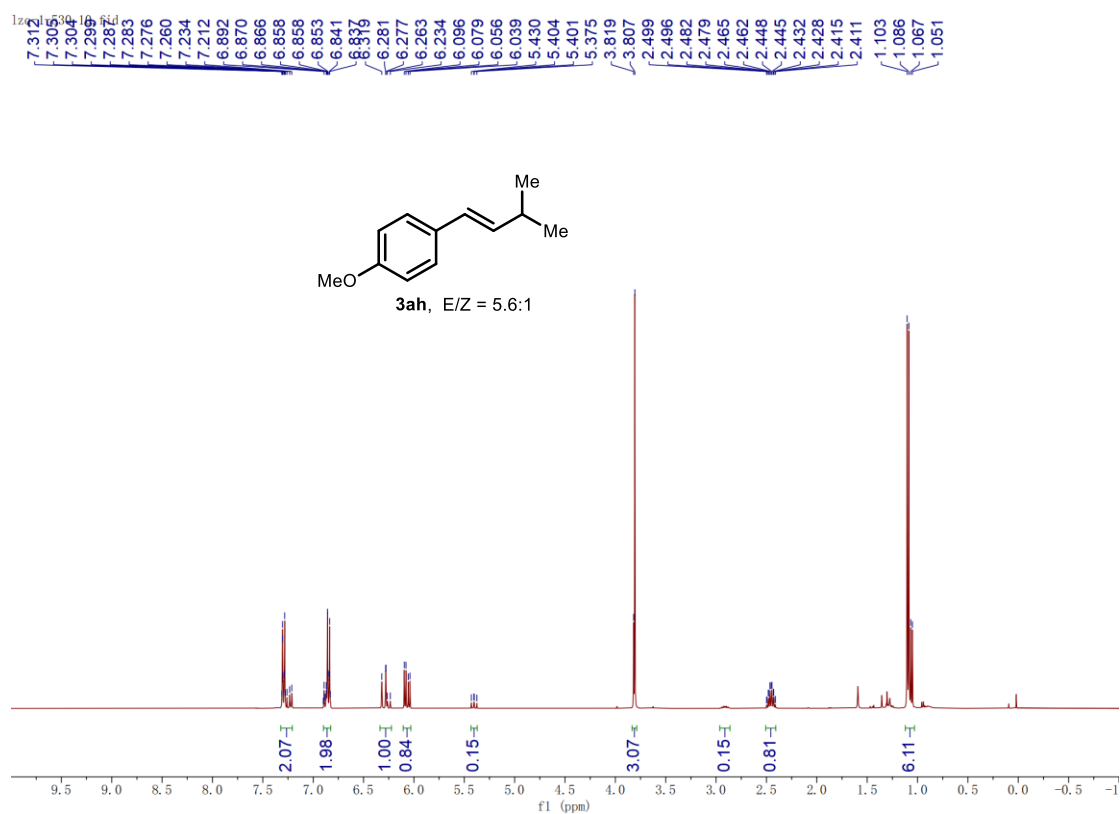

**Figure S76.** <sup>1</sup>H NMR of **3ah** (trans/cis mixture, CDCl<sub>3</sub>, 400 MHz)

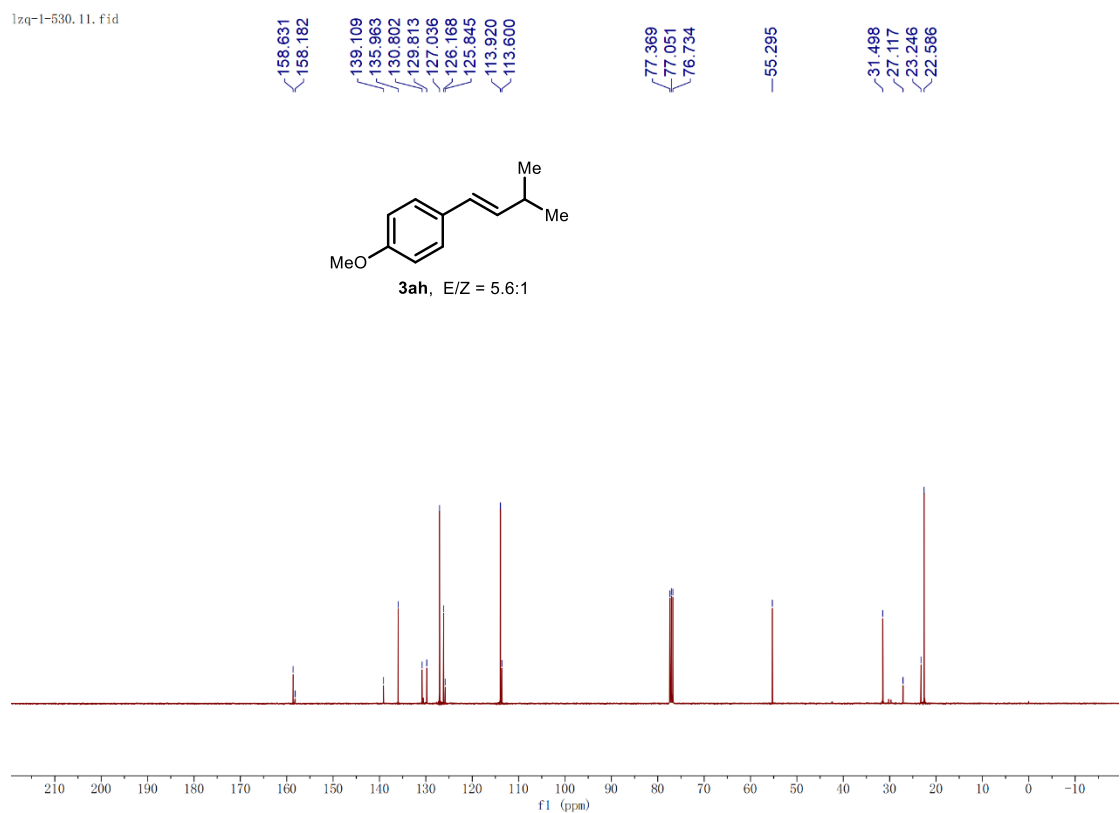

**Figure S77.** <sup>13</sup>C NMR of **3ah** (trans/cis mixture, CDCl<sub>3</sub>, 101 MHz).

12Q-1-533, 10, fid

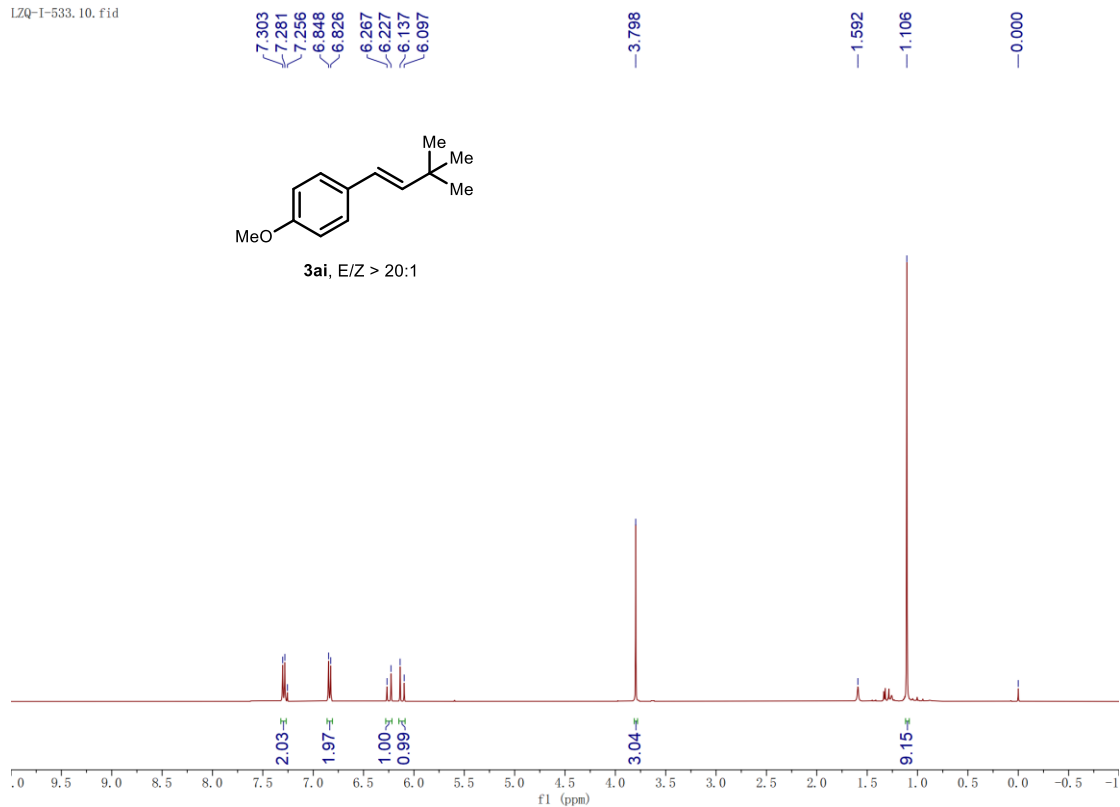

**Figure S78.**  $^1\text{H}$  NMR of **3ai** (trans,  $\text{CDCl}_3$ , 400 MHz)

12Q-1-533, 11, fid

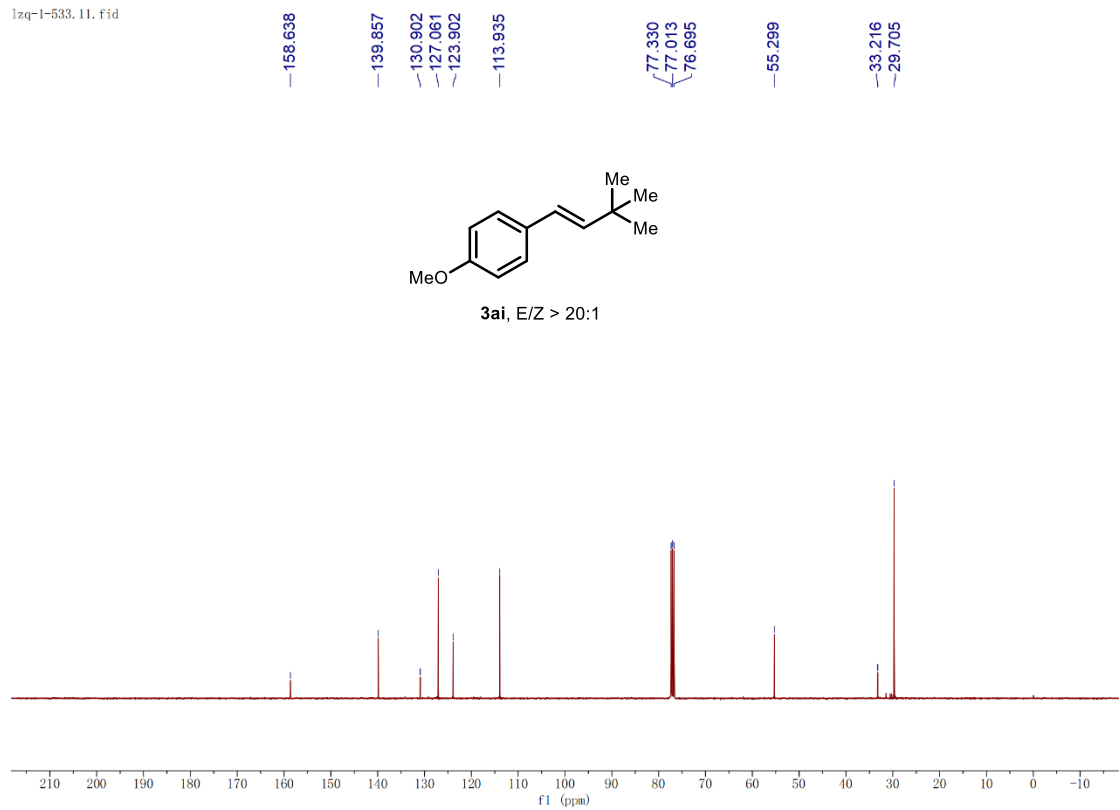

**Figure S79.**  $^{13}\text{C}$  NMR of **3ai** (trans,  $\text{CDCl}_3$ , 101 MHz).

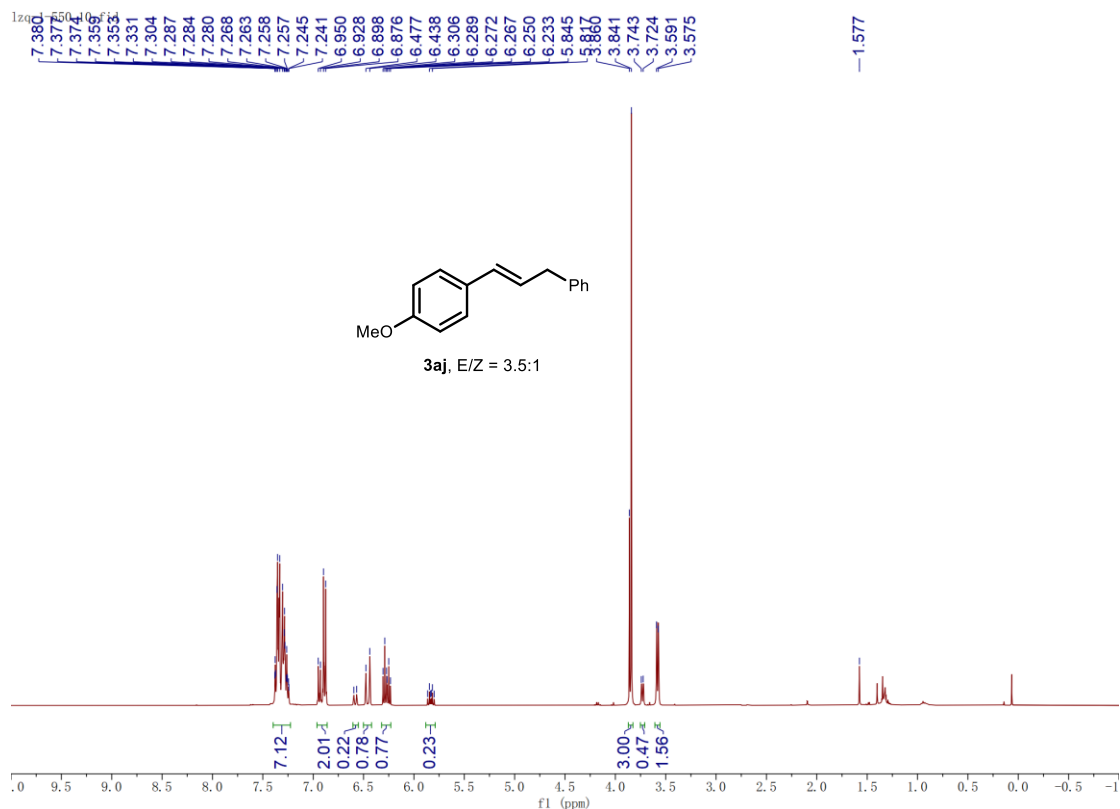

**Figure S80.**  $^1\text{H}$  NMR of **3aj** (trans/cis mixture,  $\text{CDCl}_3$ , 400 MHz)

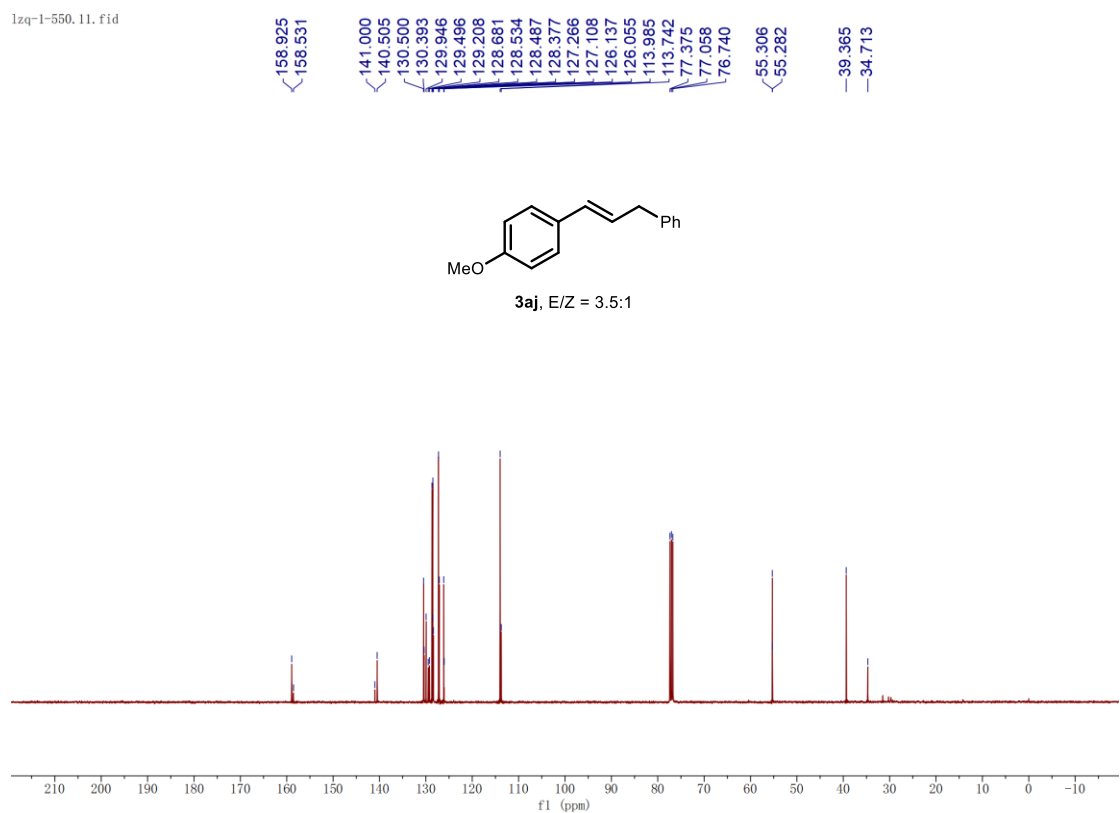

**Figure S81.**  $^{13}\text{C}$  NMR of **3aj** (trans/cis mixture,  $\text{CDCl}_3$ , 101 MHz).

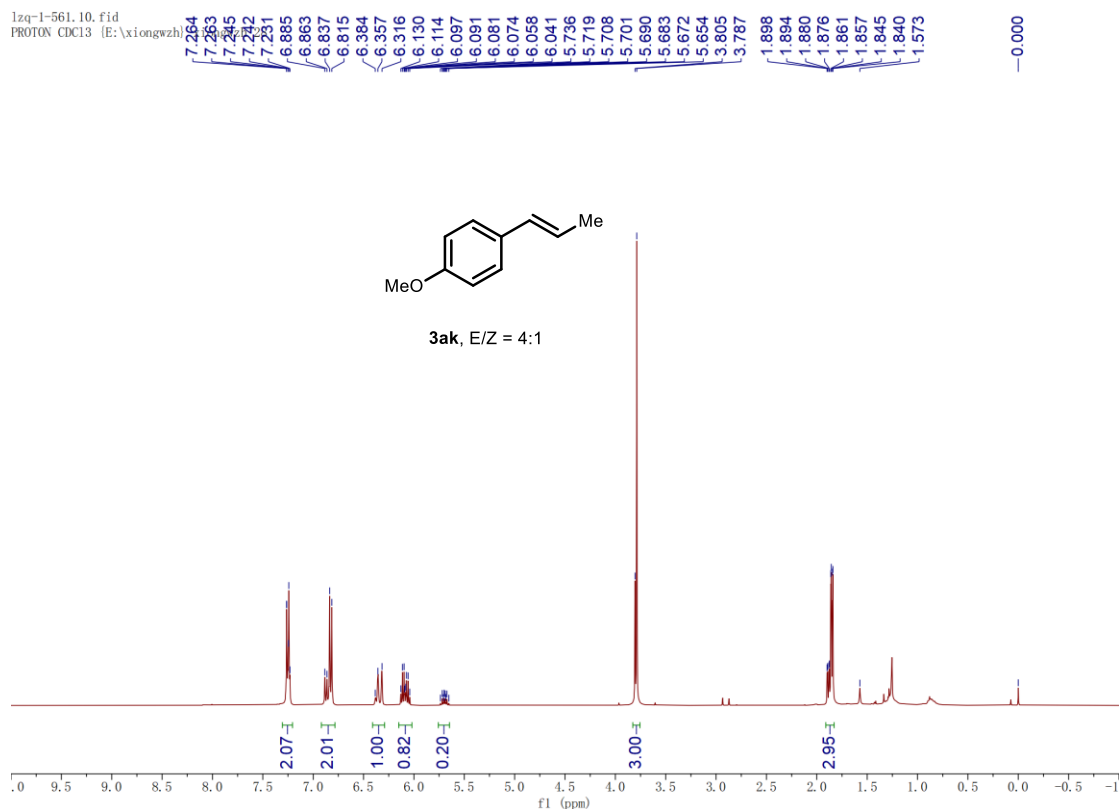

**Figure S82.**  $^1\text{H}$  NMR of **3ak** (trans/cis mixture,  $\text{CDCl}_3$ , 400 MHz).

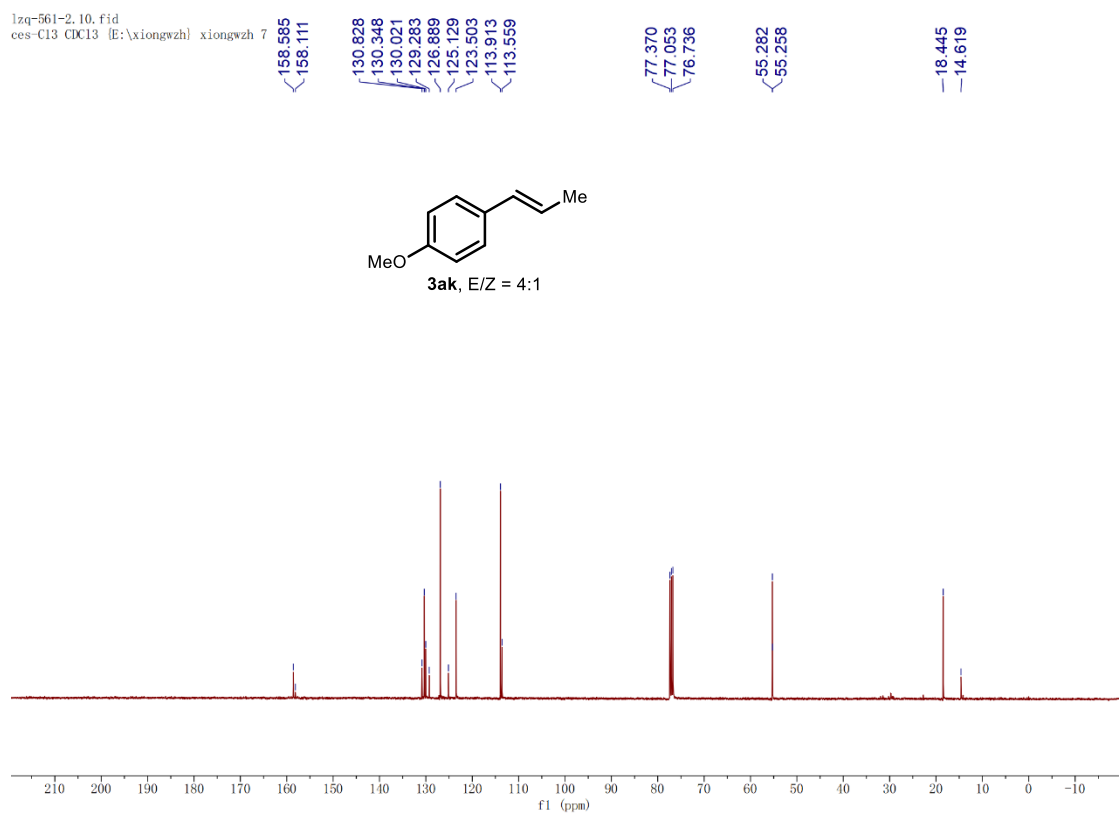

**Figure S83.**  $^{13}\text{C}$  NMR of **3ak** (trans/cis mixture,  $\text{CDCl}_3$ , 101 MHz).

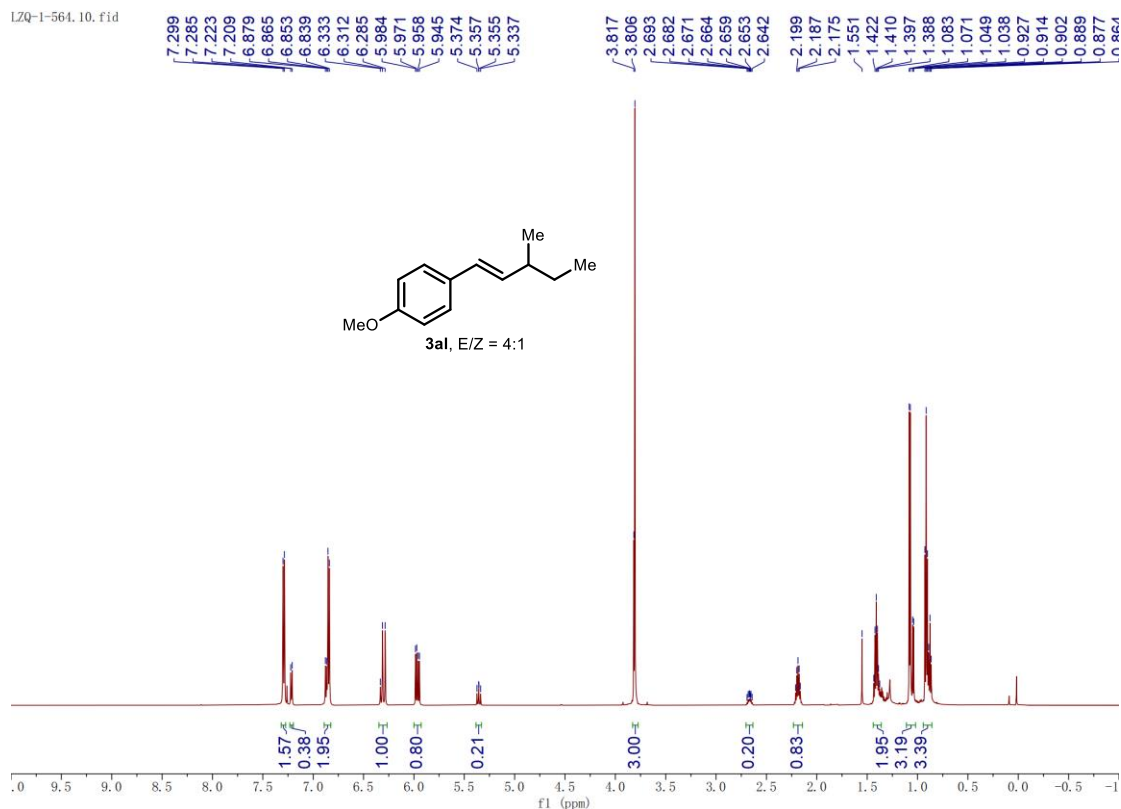

**Figure S84.**  $^1\text{H}$  NMR of **3al** (trans/cis mixture,  $\text{CDCl}_3$ , 600 MHz).

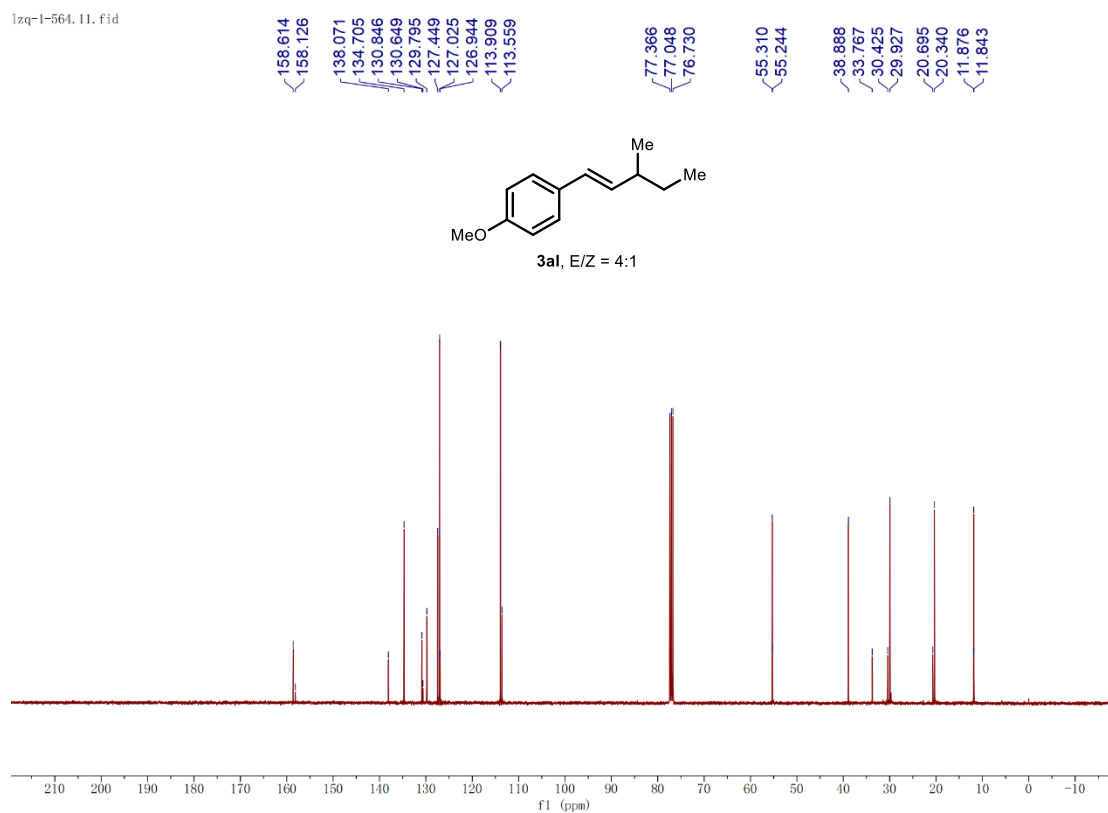

**Figure S85.**  $^{13}\text{C}$  NMR of **3al** (trans/cis mixture,  $\text{CDCl}_3$ , 101 MHz).

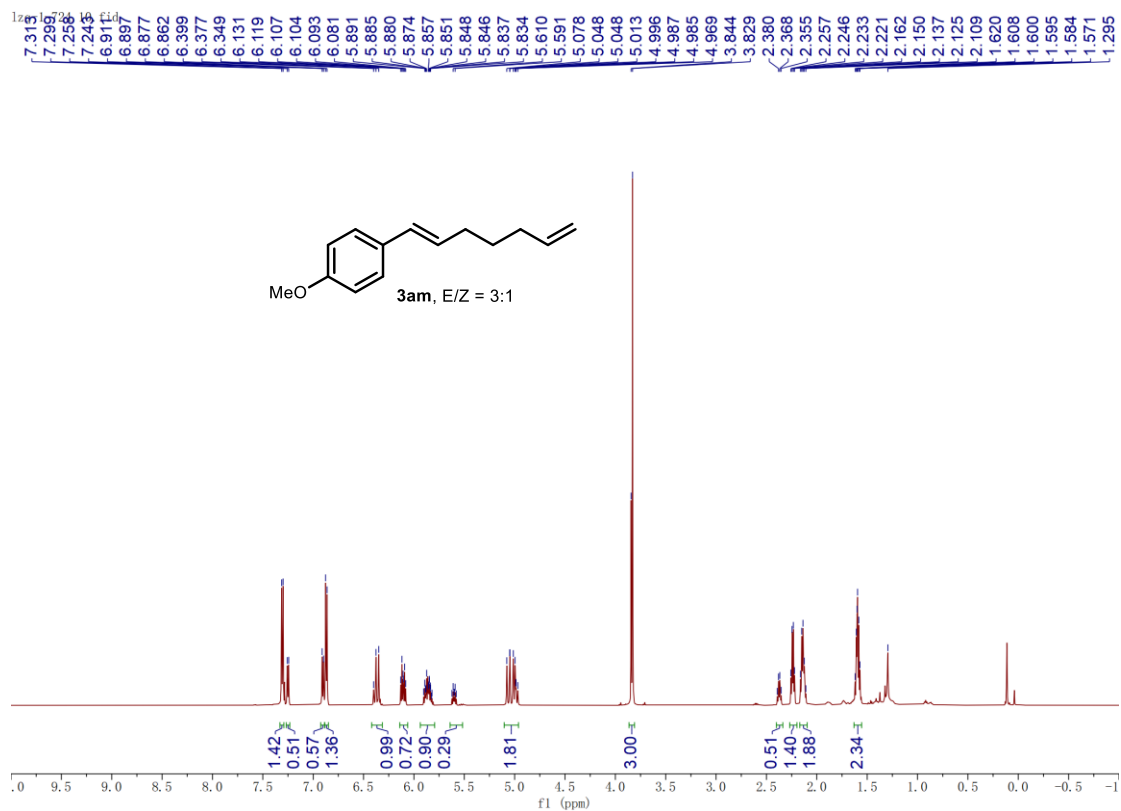

**Figure S86.**  $^1\text{H}$  NMR of **3am** (trans/cis mixture,  $\text{CDCl}_3$ , 400 MHz).

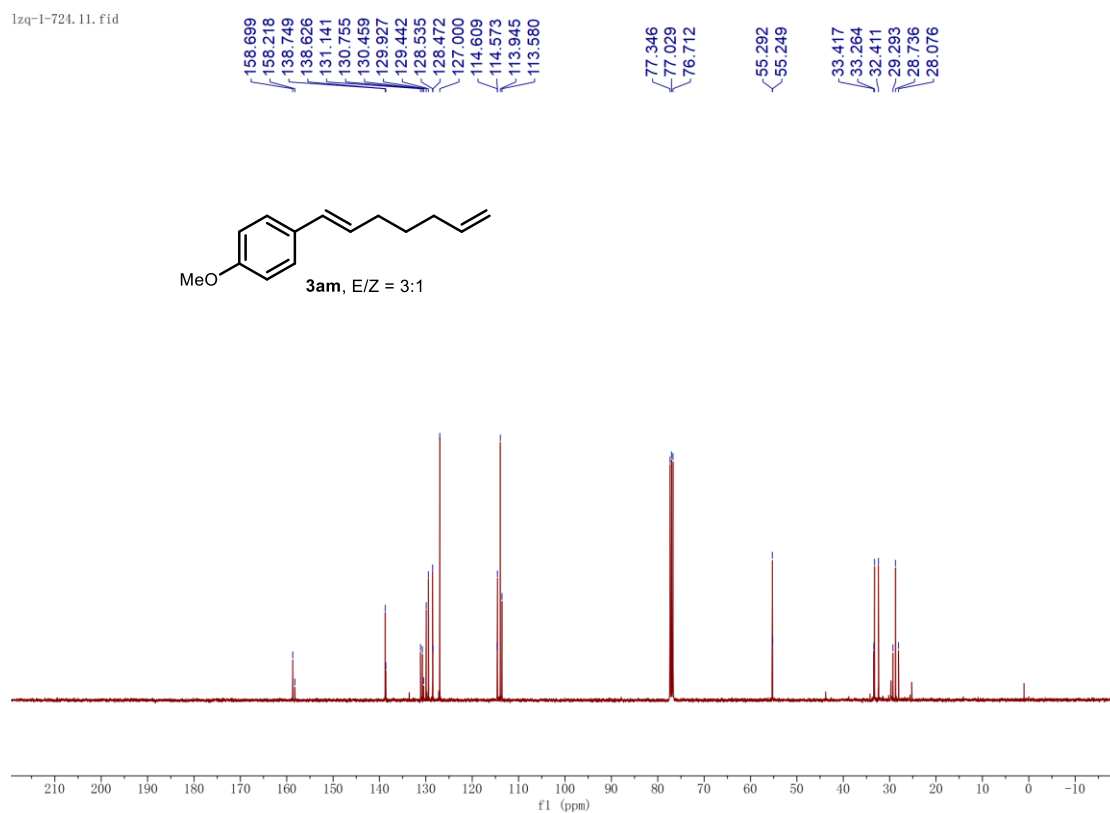

**Figure S87.**  $^{13}\text{C}$  NMR of **3am** (trans/cis mixture,  $\text{CDCl}_3$ , 101 MHz).



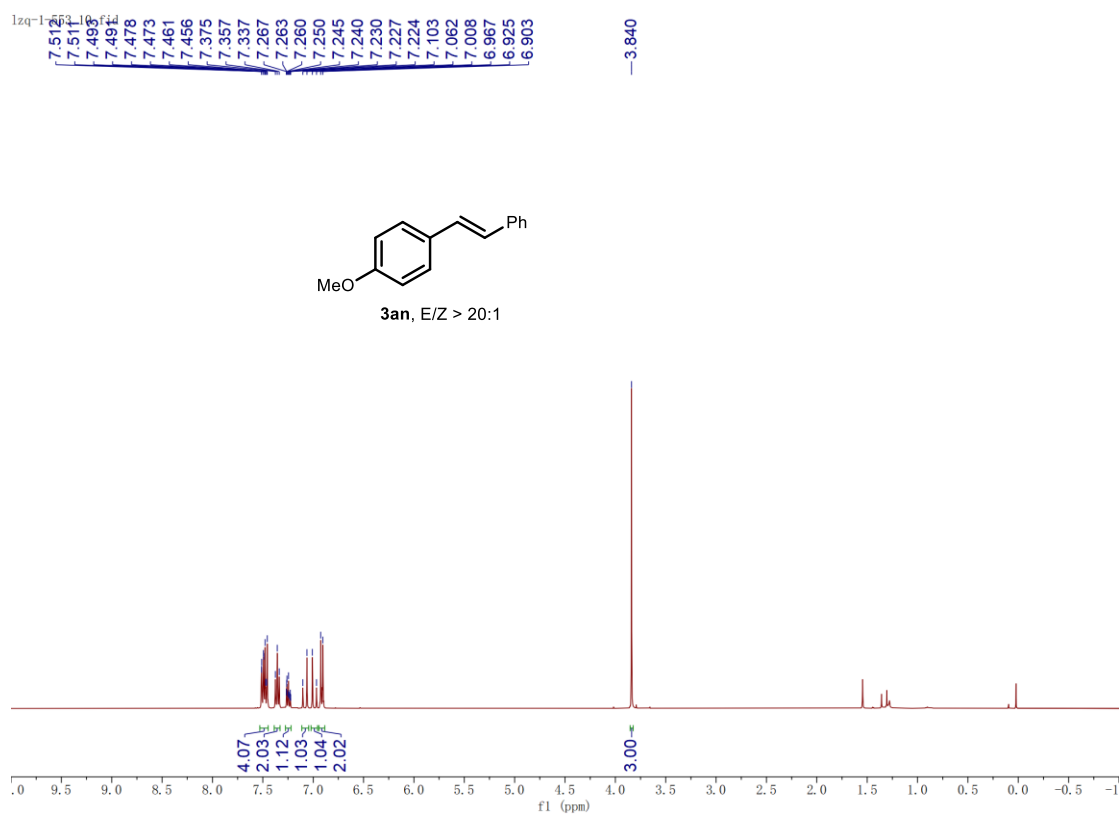

**Figure S88.**  $^1\text{H}$  NMR of **3an** (trans,  $\text{CDCl}_3$ , 400 MHz)

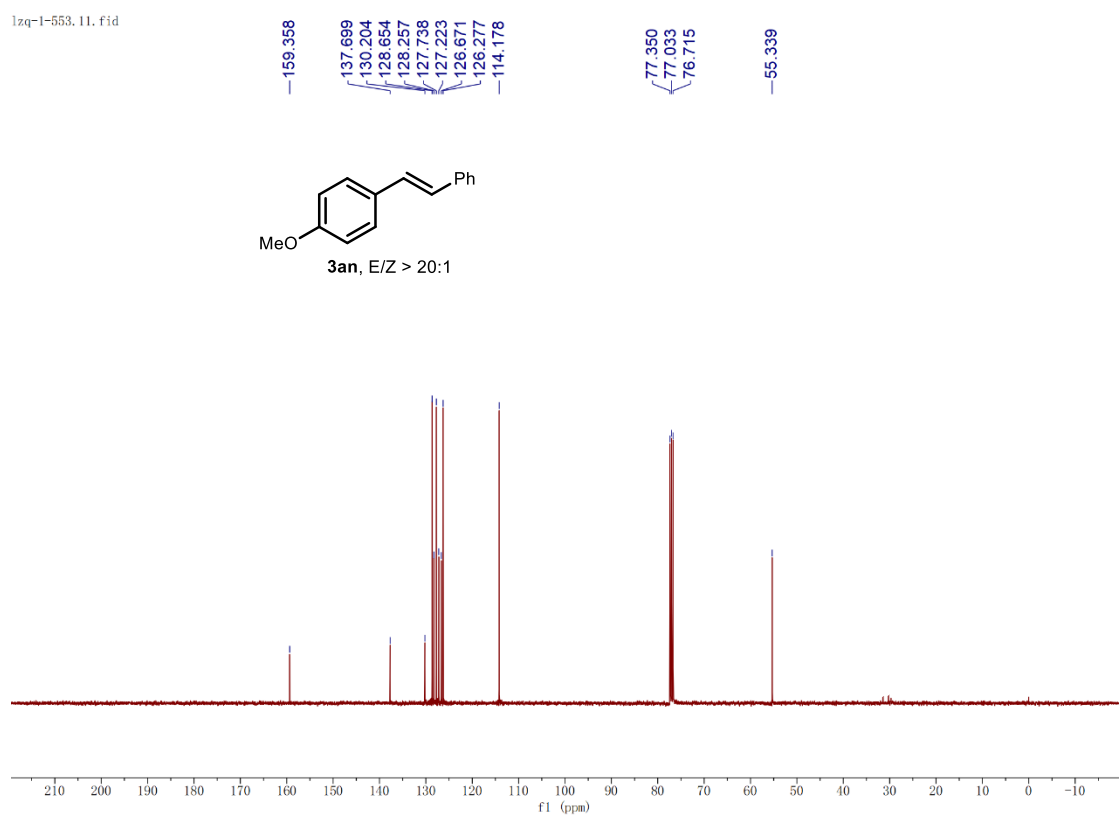

**Figure S89.**  $^{13}\text{C}$  NMR of **3an** (trans,  $\text{CDCl}_3$ , 101 MHz).

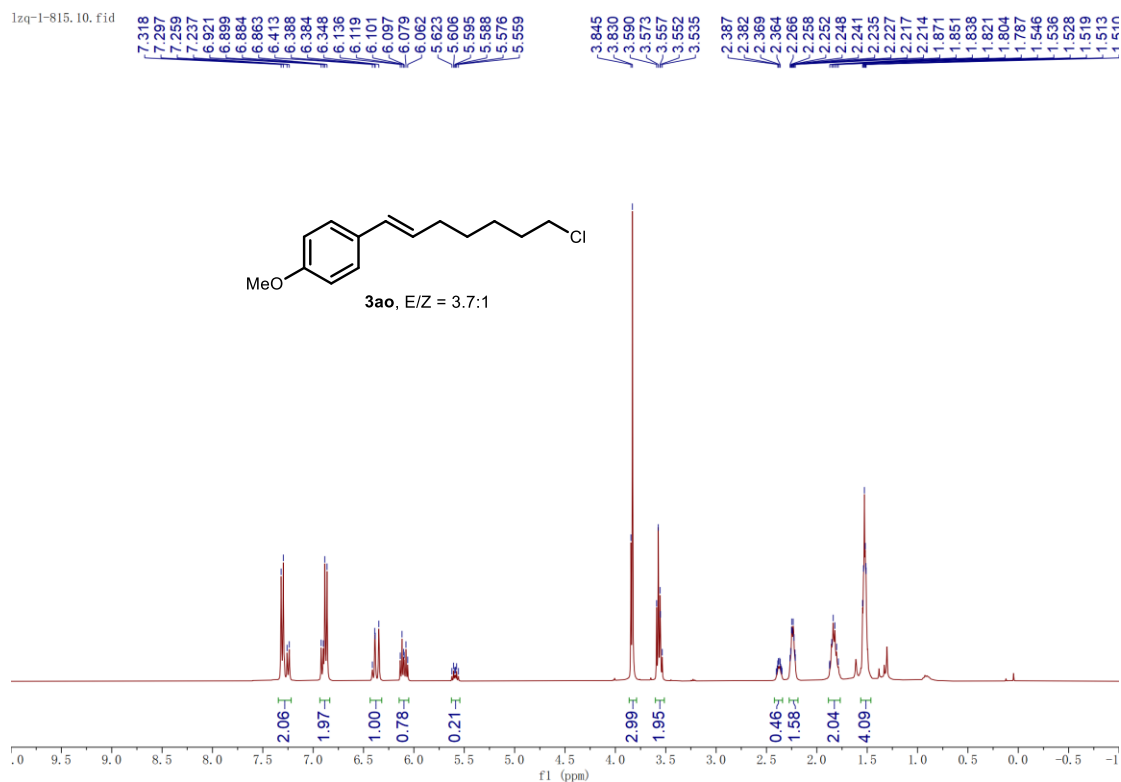

**Figure S90.**  $^1\text{H}$  NMR of **3ao** (cis/trans,  $\text{CDCl}_3$ , 400 MHz)

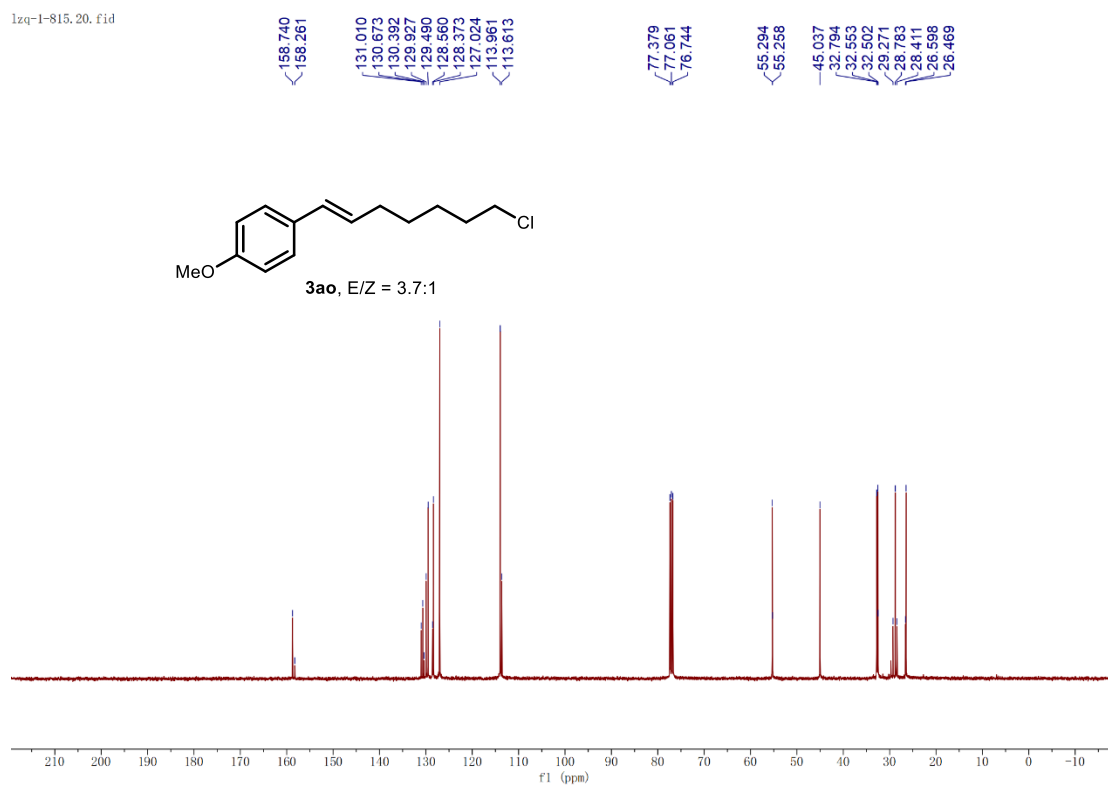

**Figure S91.**  $^{13}\text{C}$  NMR of **3ao** (trans,  $\text{CDCl}_3$ , 101 MHz).

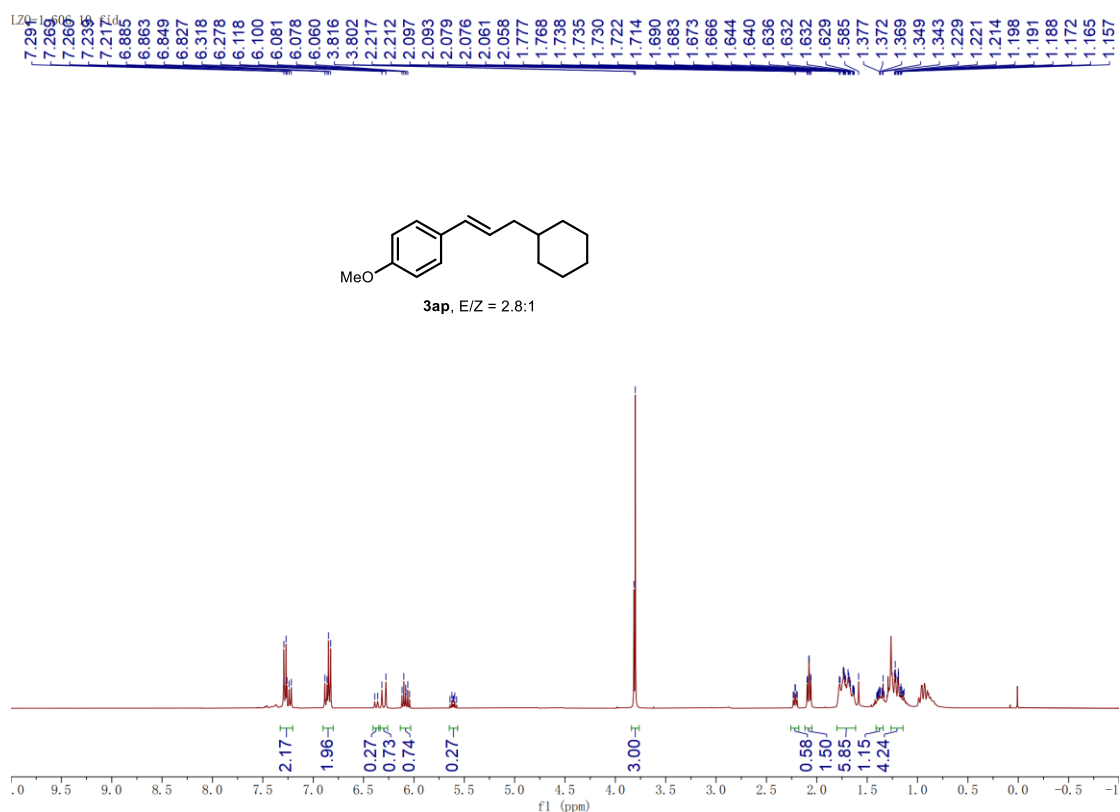

**Figure S92.**  $^1\text{H}$  NMR of **3ap** (trans/cis mixture,  $\text{CDCl}_3$ , 400 MHz).

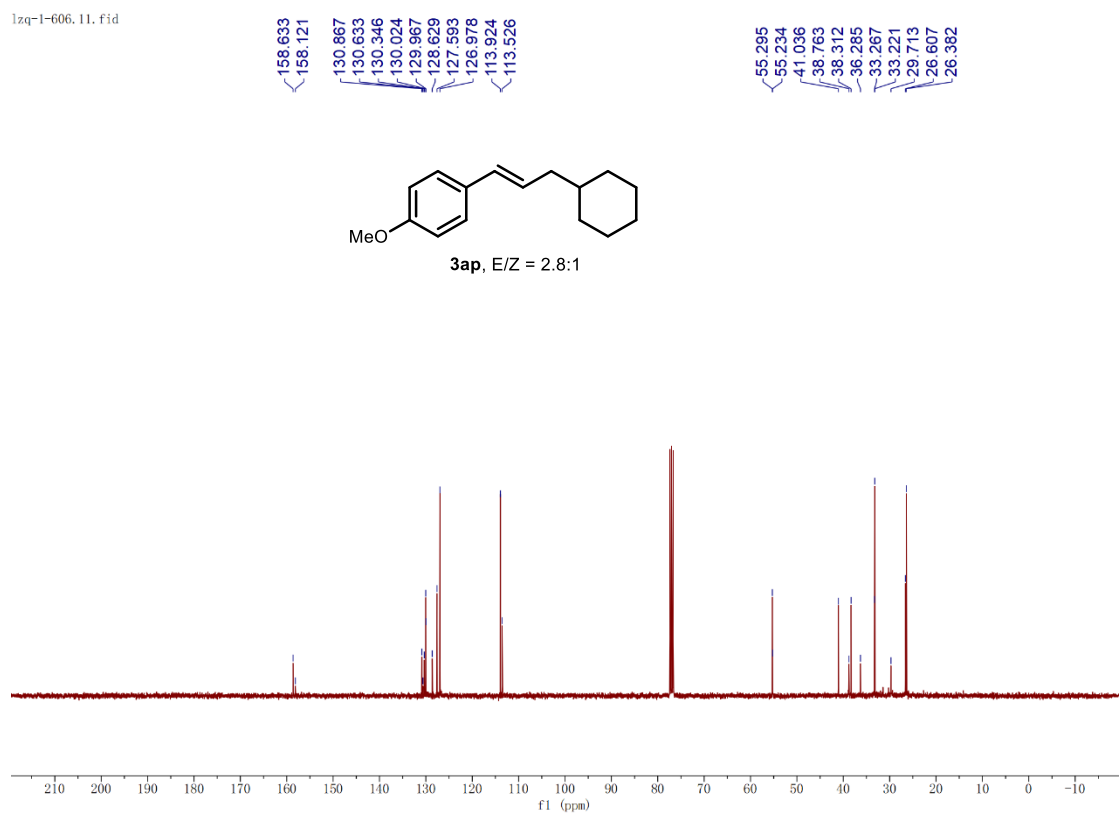

**Figure S93.**  $^{13}\text{C}$  NMR of **3ap** (trans/cis mixture,  $\text{CDCl}_3$ , 101 MHz).

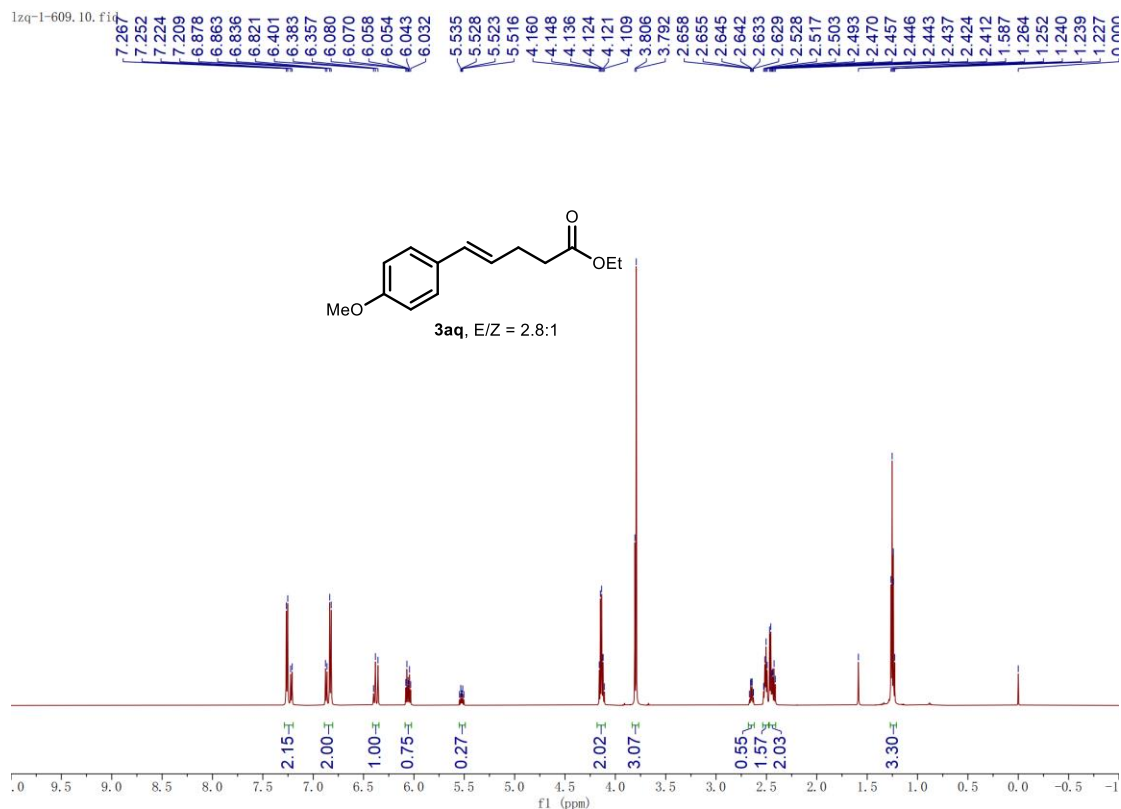

**Figure S94.**  $^1\text{H}$  NMR of **3aq** (trans/cis mixture,  $\text{CDCl}_3$ , 600 MHz).

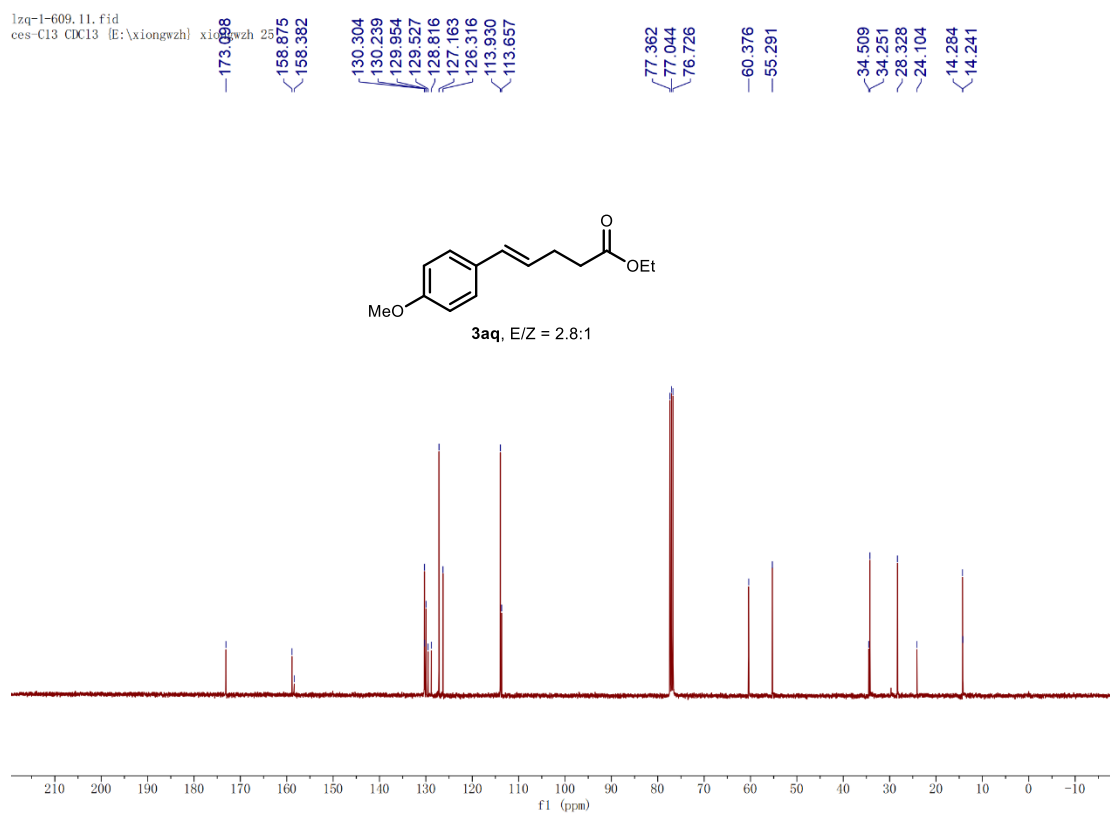

**Figure S95.**  $^{13}\text{C}$  NMR of **3aq** (trans/cis mixture,  $\text{CDCl}_3$ , 101 MHz).

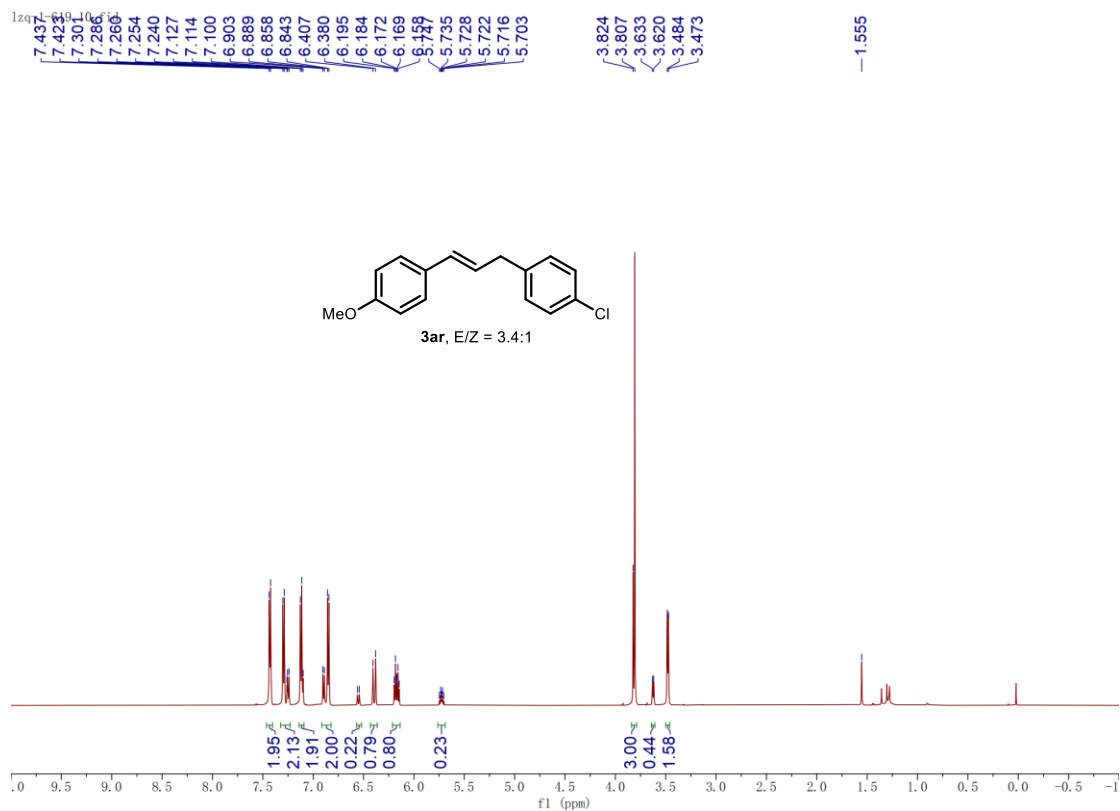

**Figure S96.**  $^1\text{H}$  NMR of **3ar** (trans/cis mixture,  $\text{CDCl}_3$ , 600 MHz).

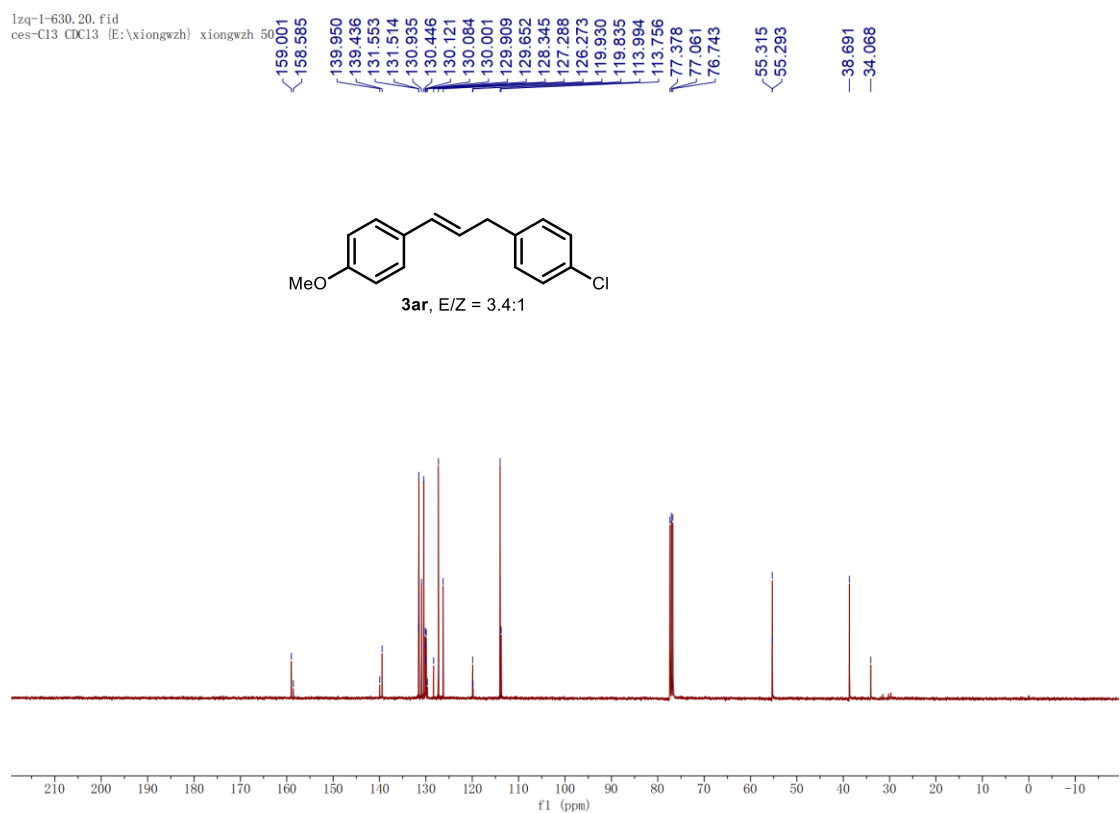

**Figure S97.**  $^{13}\text{C}$  NMR of **3ar** (trans/cis mixture,  $\text{CDCl}_3$ , 101 MHz).

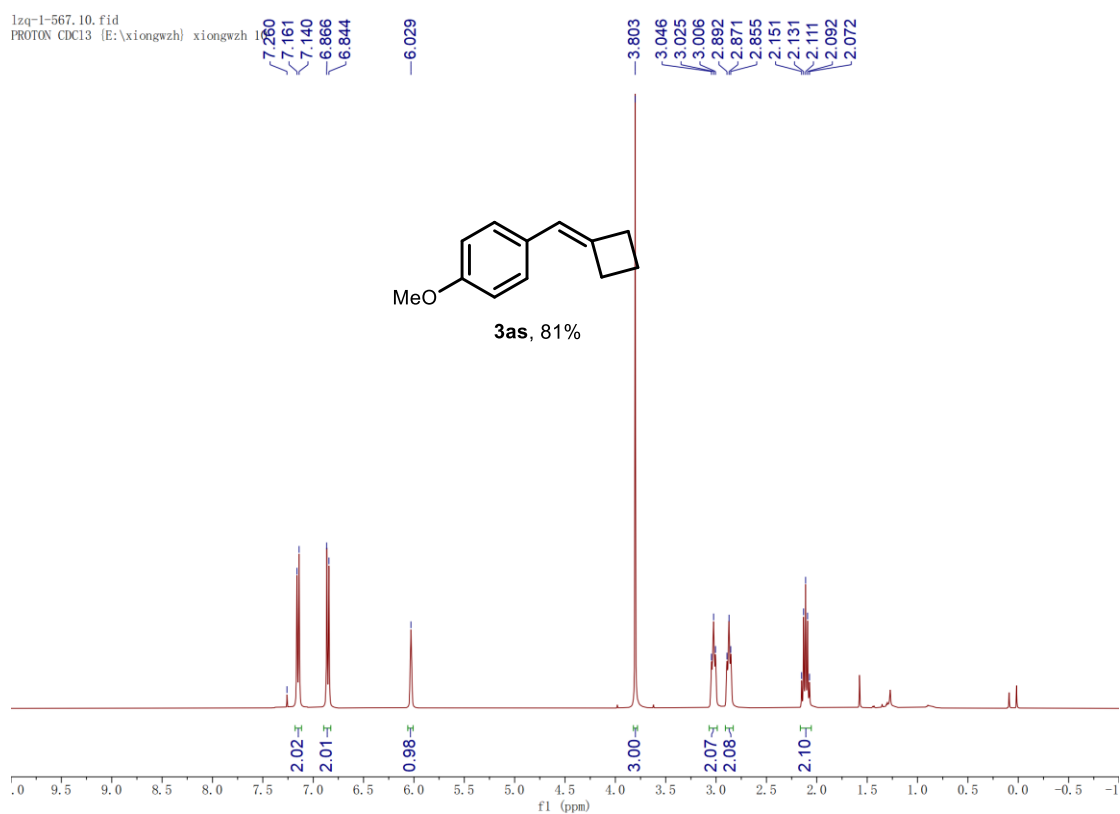

**Figure S98.**  $^1\text{H}$  NMR of **3as** ( $\text{CDCl}_3$ , 400 MHz).

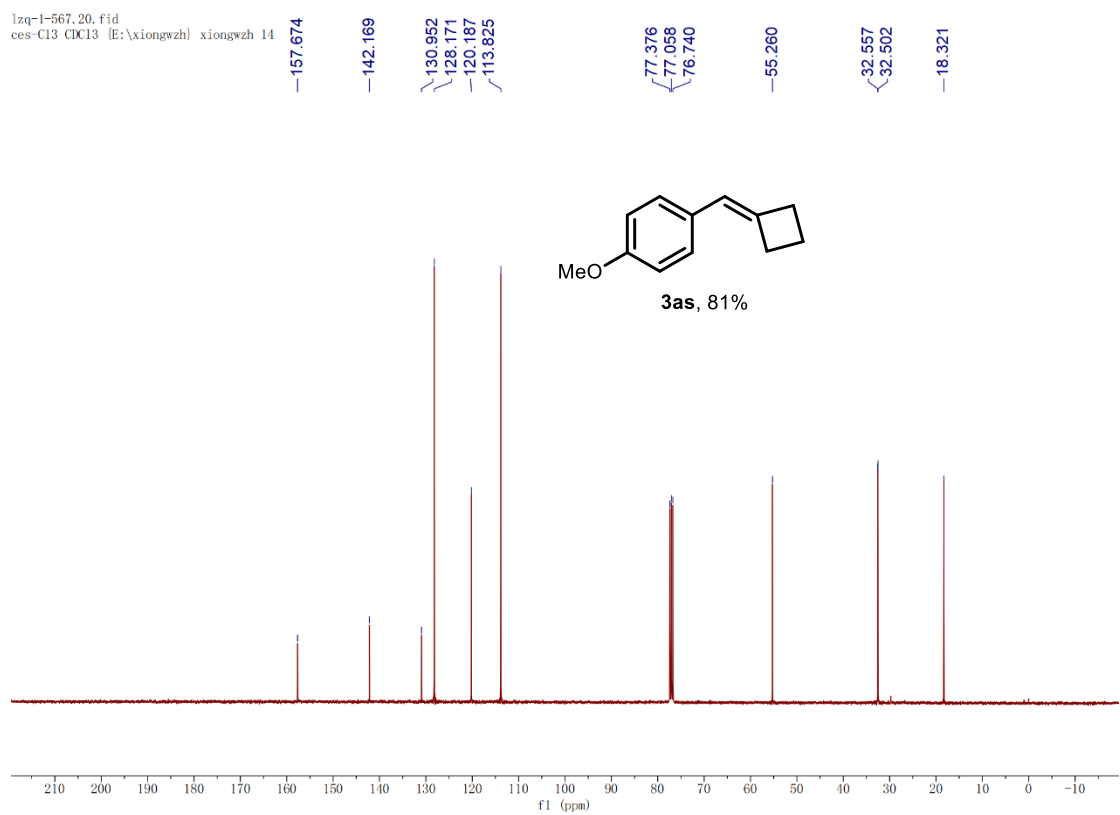

**Figure S99.**  $^{13}\text{C}$  NMR of **3as** ( $\text{CDCl}_3$ , 101 MHz).

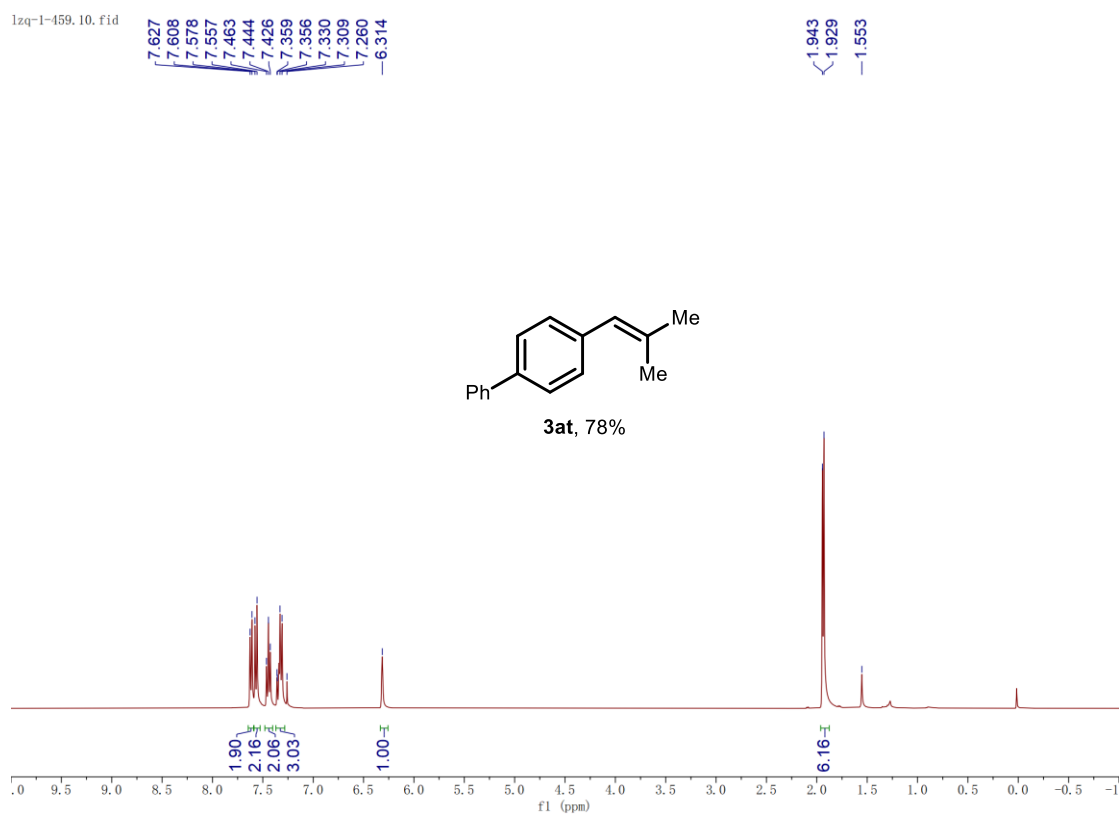

**Figure S100.**  $^1\text{H}$  NMR of **3at** (trans/cis mixture,  $\text{CDCl}_3$ , 400 MHz).

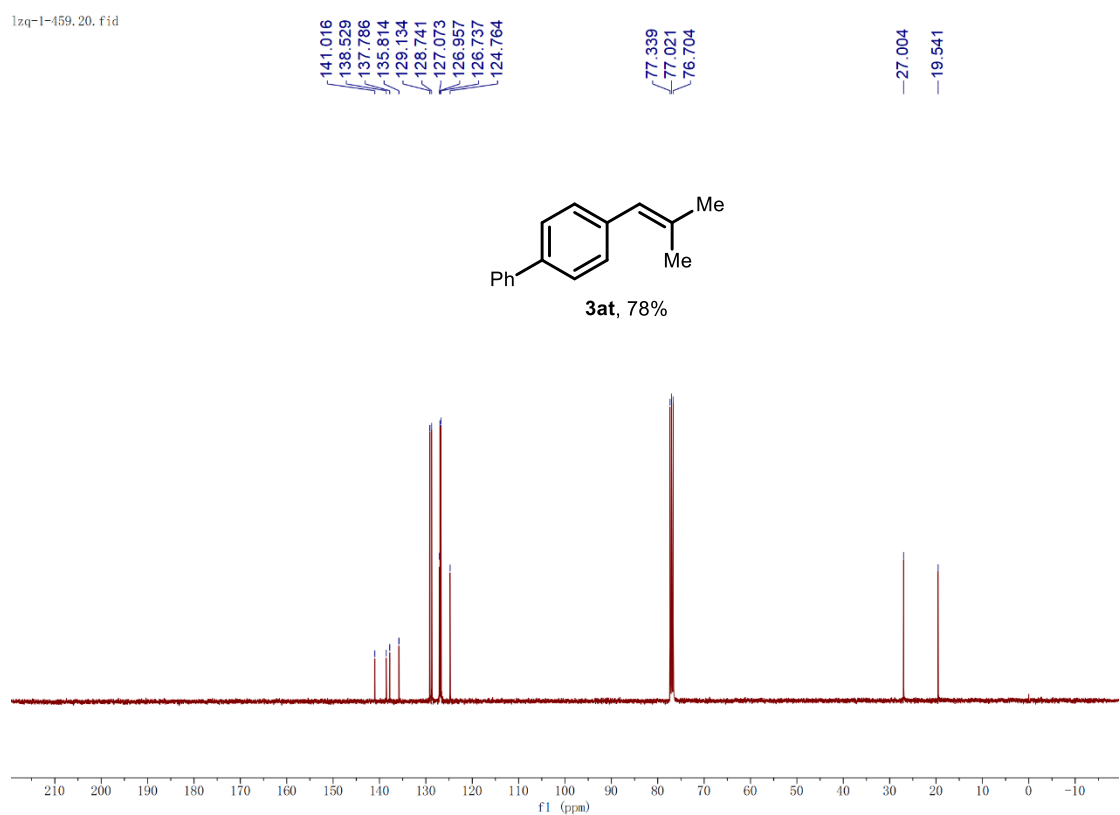

**Figure S101.**  $^{13}\text{C}$  NMR of **3at** (trans/cis mixture,  $\text{CDCl}_3$ , 101 MHz).

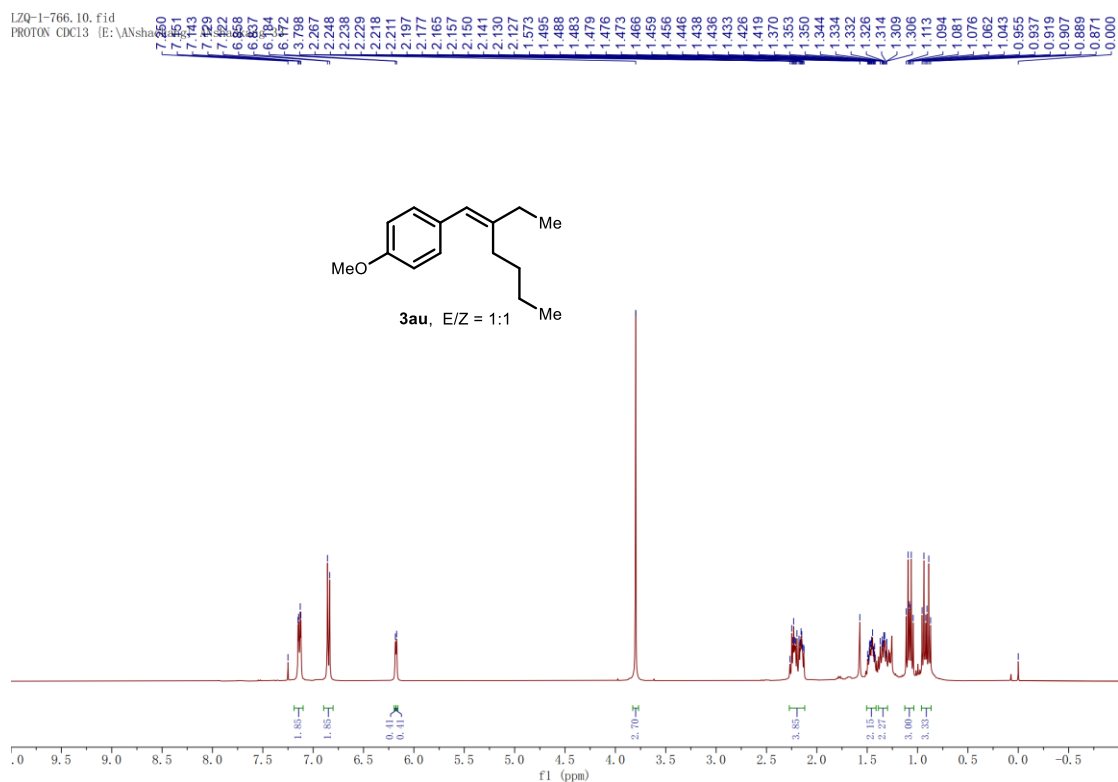

**Figure S102.** <sup>1</sup>H NMR of **3au** (trans/cis mixture, CDCl<sub>3</sub>, 400 MHz).

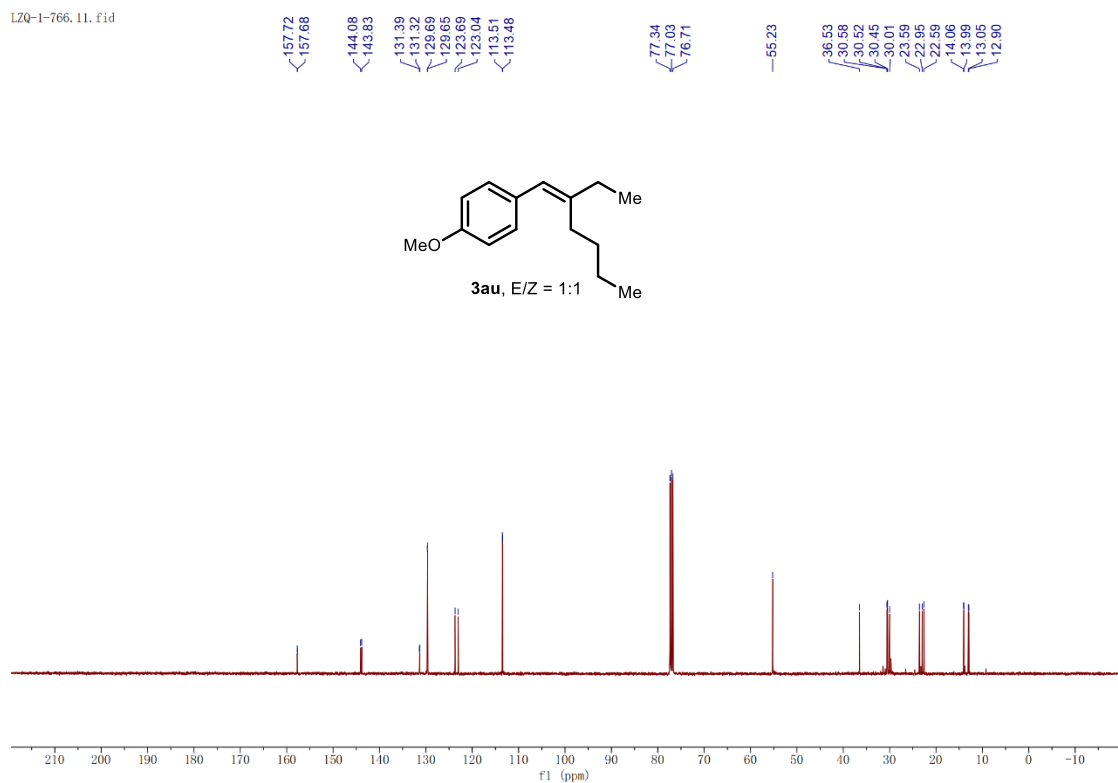

**Figure S103.** <sup>13</sup>C NMR of **3au** (trans/cis mixture, CDCl<sub>3</sub>, 101 MHz).



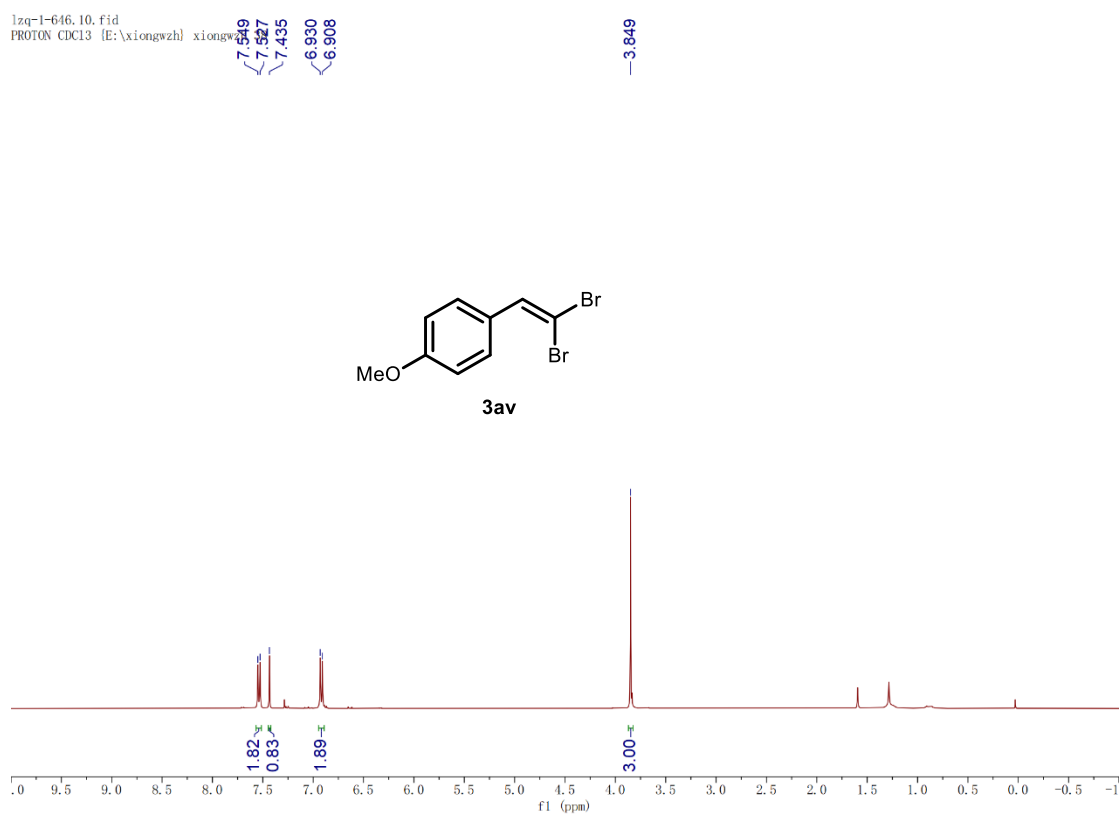

**Figure S104.**  $^1\text{H}$  NMR of **3av** ( $\text{CDCl}_3$ , 400 MHz).

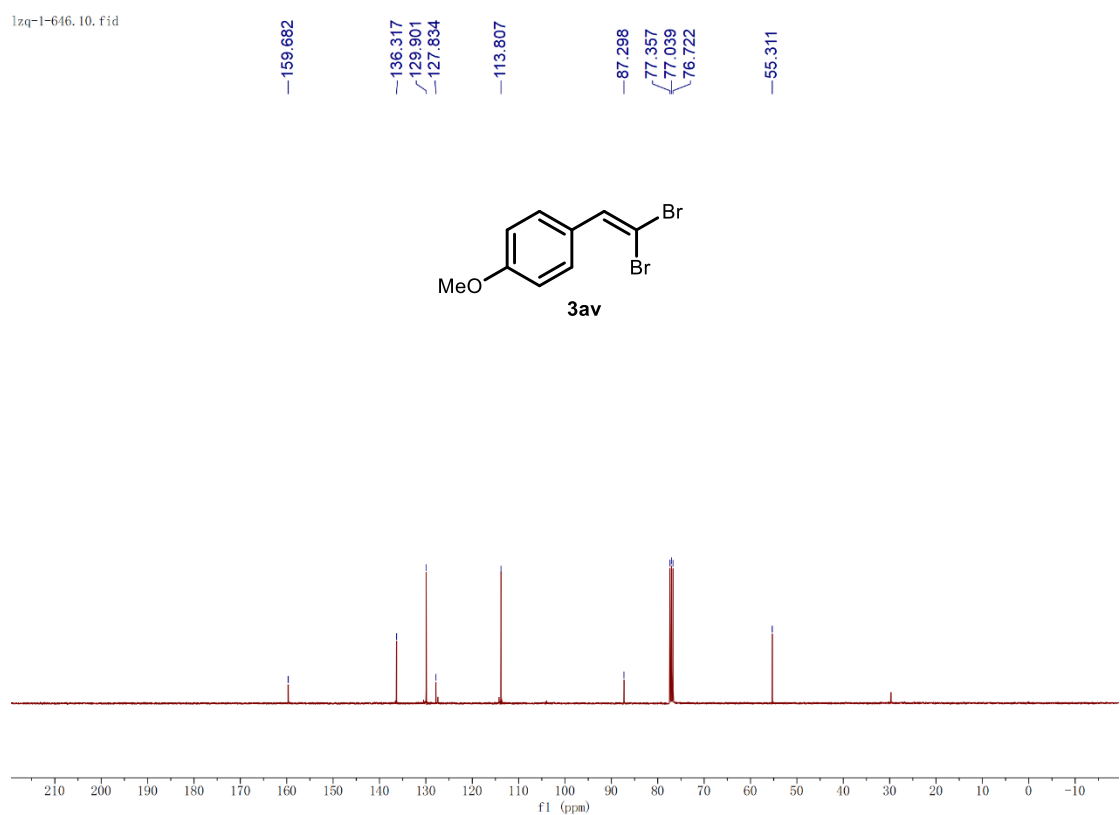

**Figure S105.**  $^{13}\text{C}$  NMR of **3av** ( $\text{CDCl}_3$ , 101 MHz).

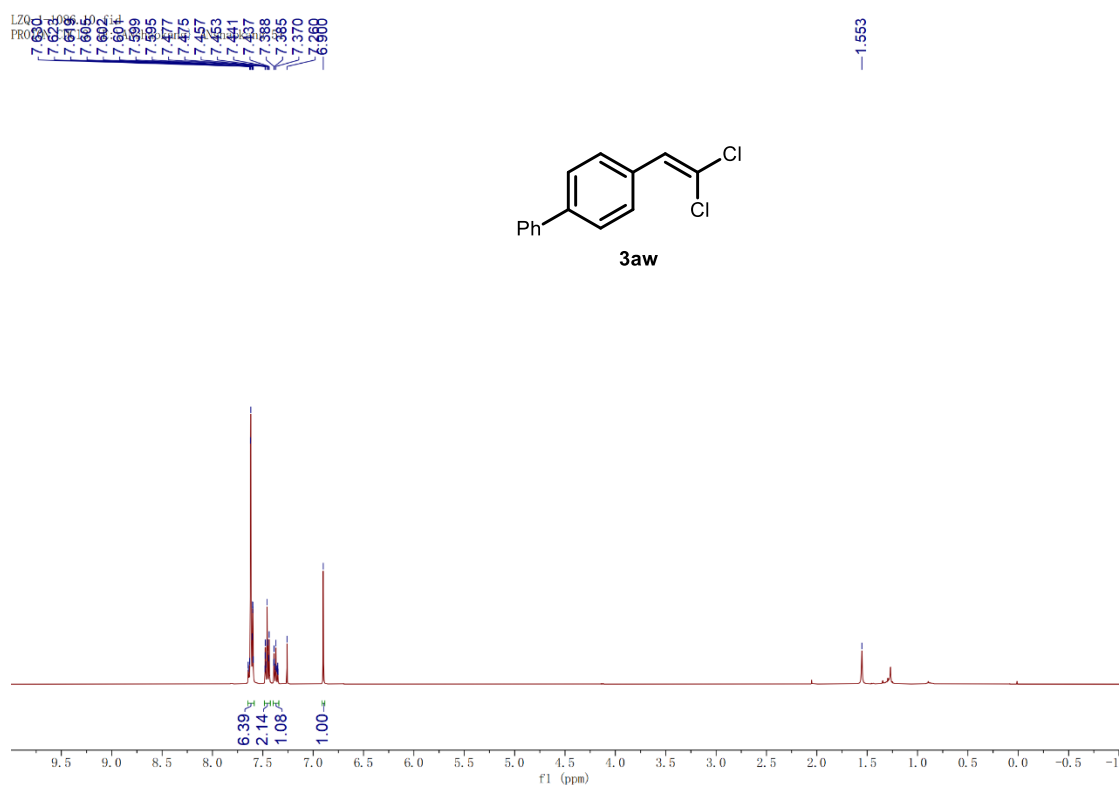

**Figure S106.**  $^1\text{H}$  NMR of **3aw** (cis,  $\text{CDCl}_3$ , 400 MHz).

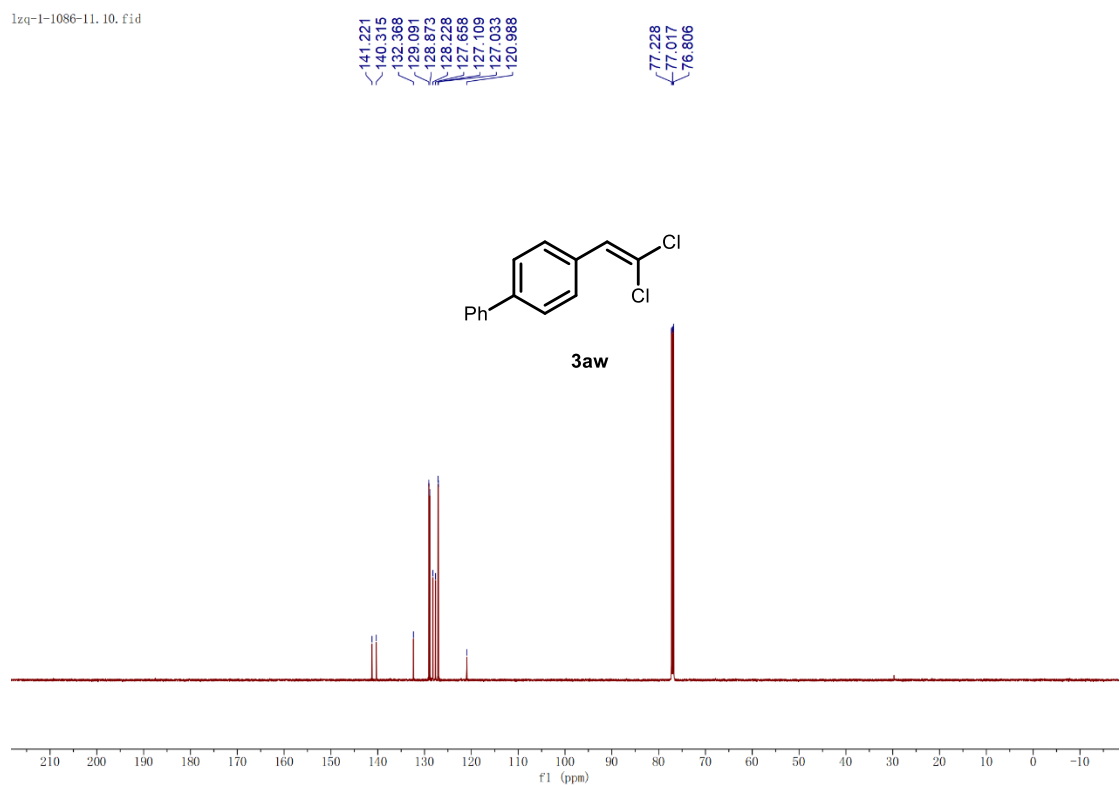

**Figure S107.**  $^{13}\text{C}$  NMR of **3aw** ( $\text{CDCl}_3$ , 151 MHz).

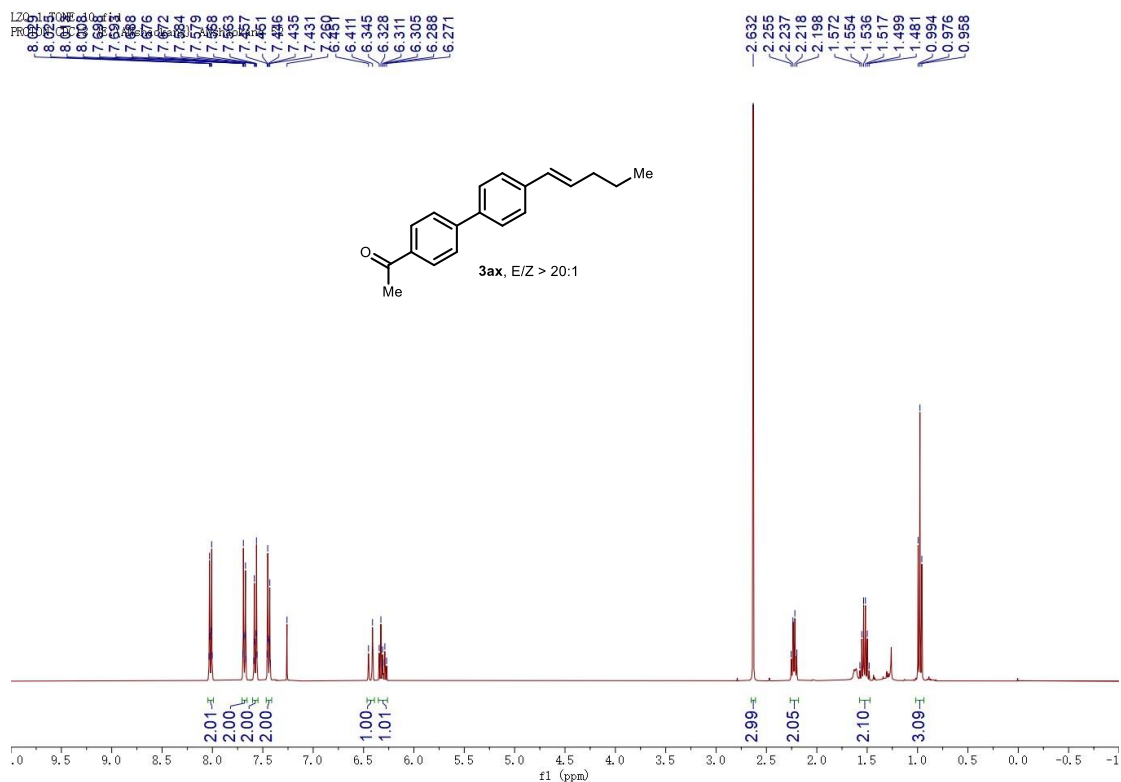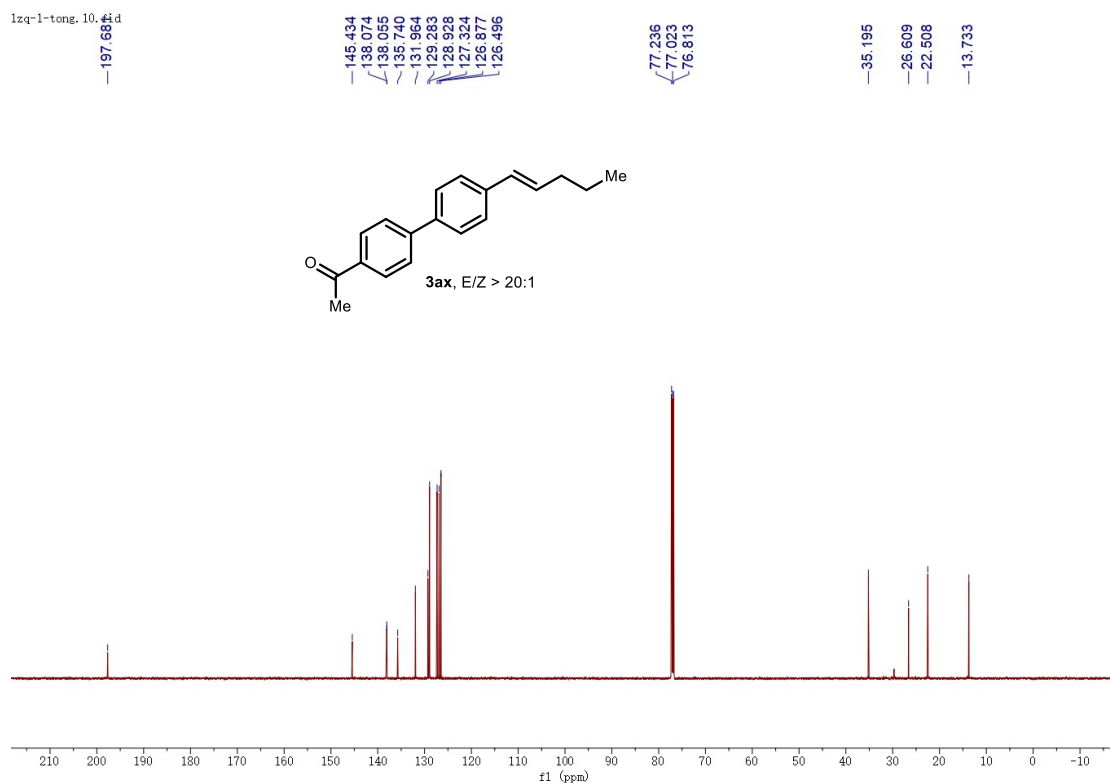

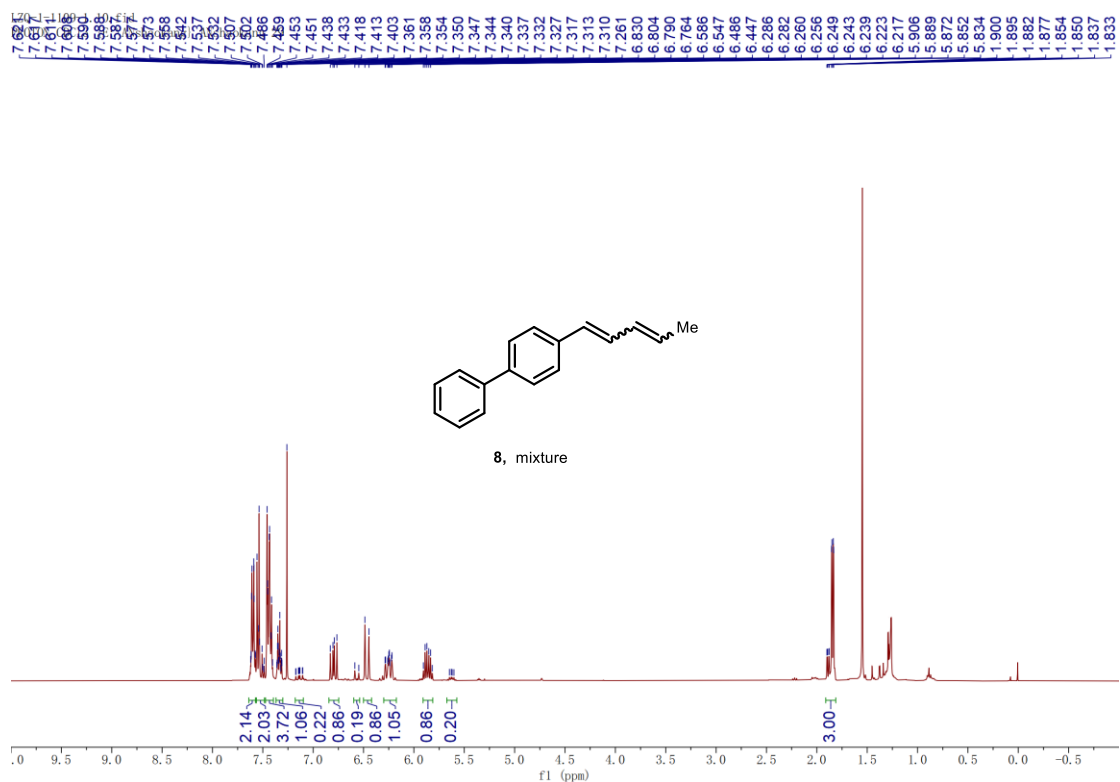

**Figure S110.** <sup>1</sup>H NMR of **8** (trans/cis mixture, CDCl<sub>3</sub>, 400 MHz).

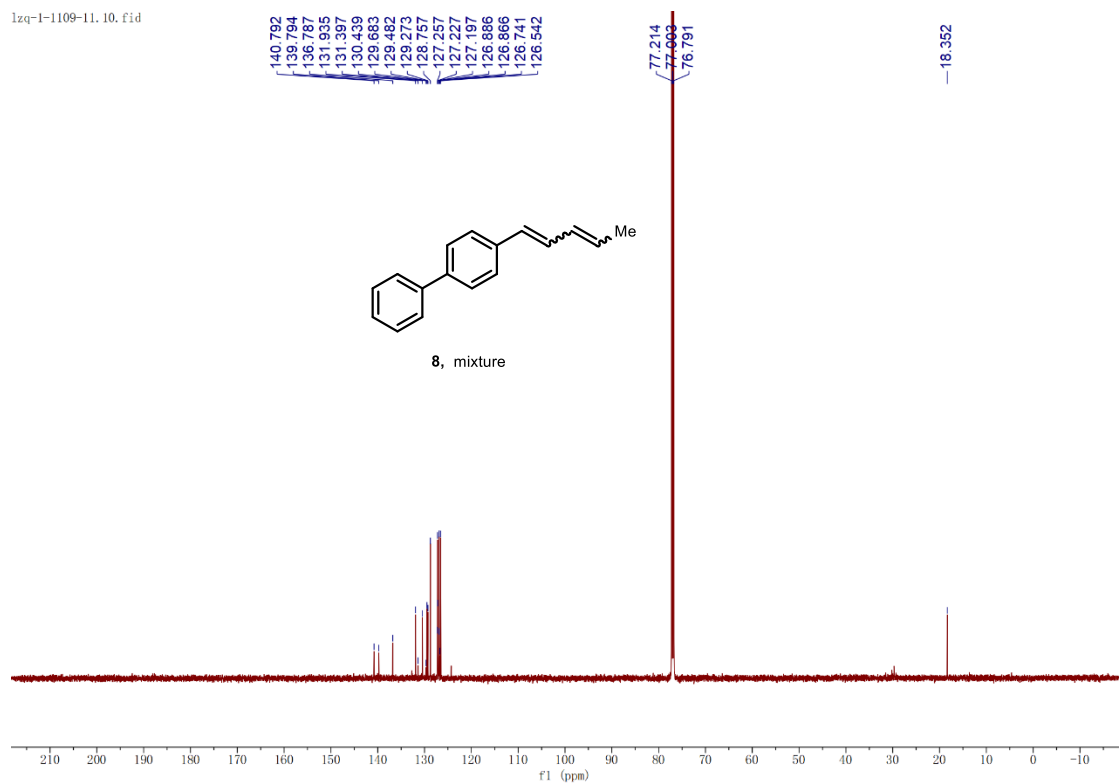

**Figure S111.** <sup>13</sup>C NMR of **8** (trans/cis mixture, CDCl<sub>3</sub>, 151 MHz).

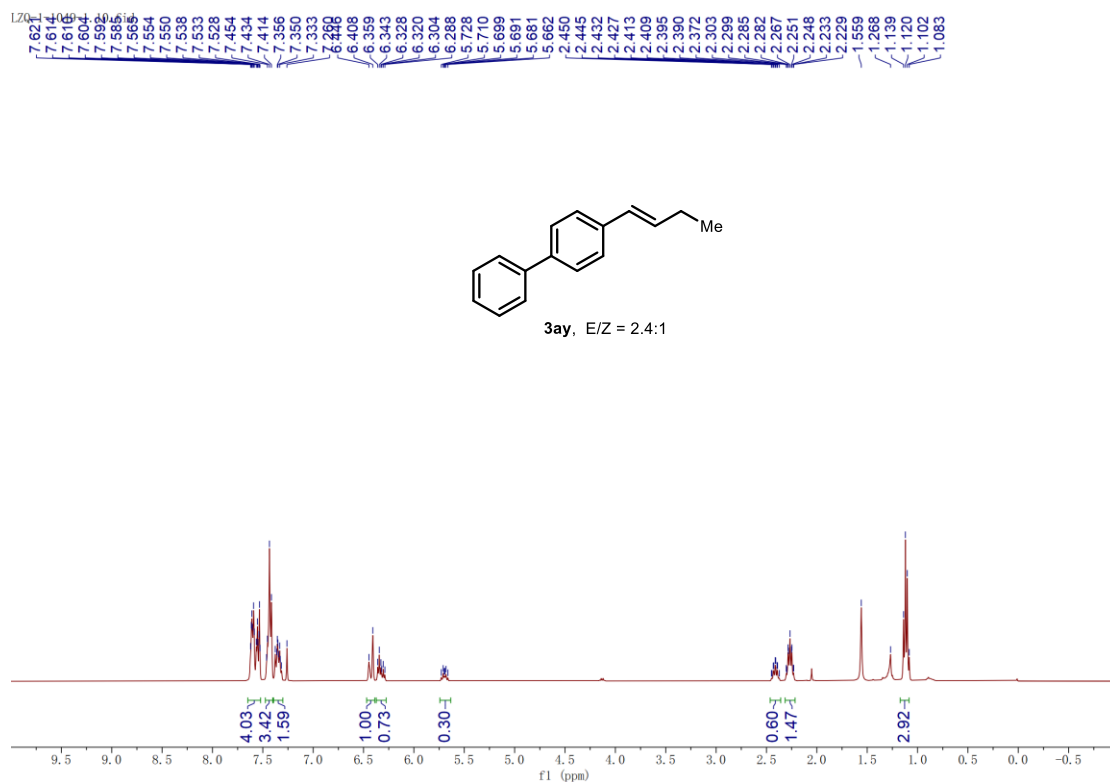

**Figure S112.**  $^1\text{H}$  NMR of **3ay** (trans/cis mixture,  $\text{CDCl}_3$ , 400 MHz).

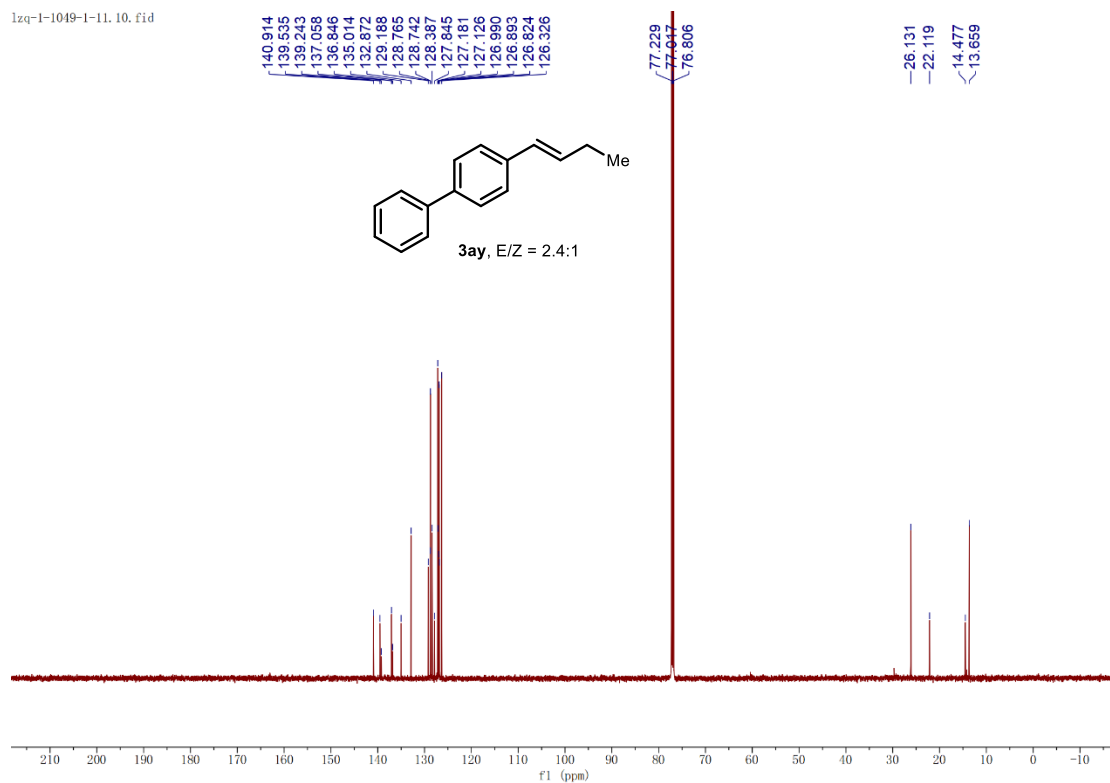

**Figure S113.**  $^{13}\text{C}$  NMR of **3ay** (trans/cis mixture,  $\text{CDCl}_3$ , 101 MHz).

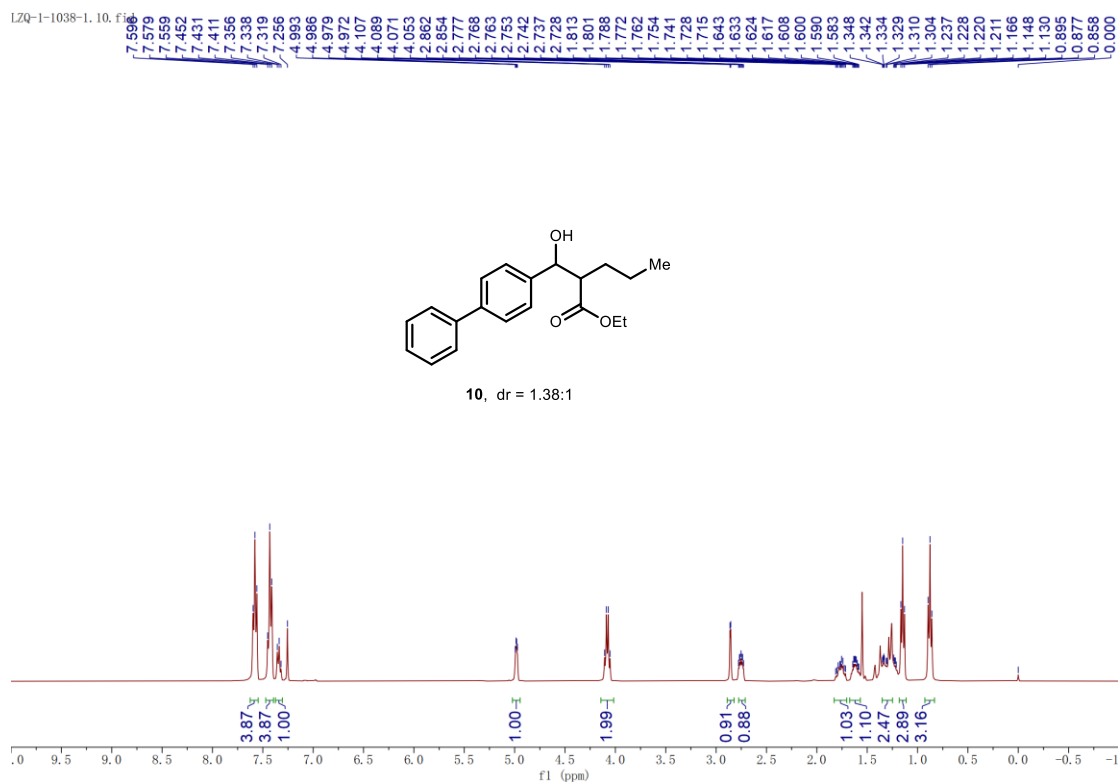

**Figure S114.**  $^1\text{H}$  NMR of **10** ( $\text{CDCl}_3$ , 400 MHz).

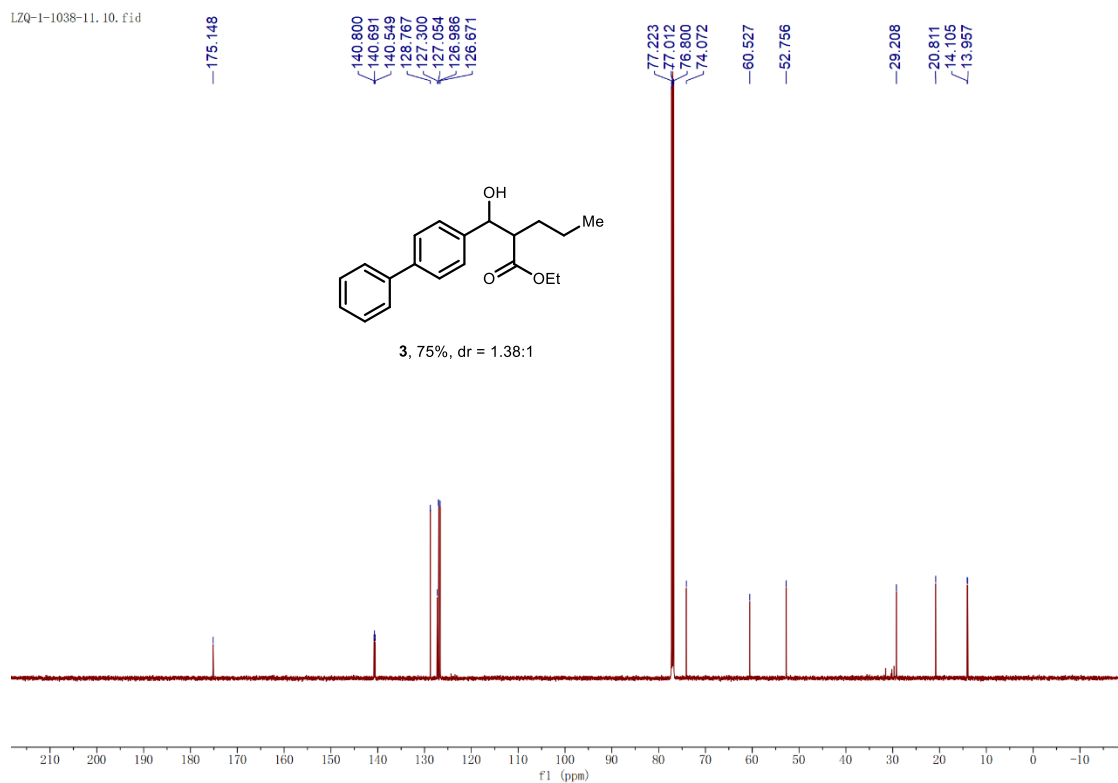

**Figure S115.**  $^{13}\text{C}$  NMR of **10** ( $\text{CDCl}_3$ , 151 MHz).

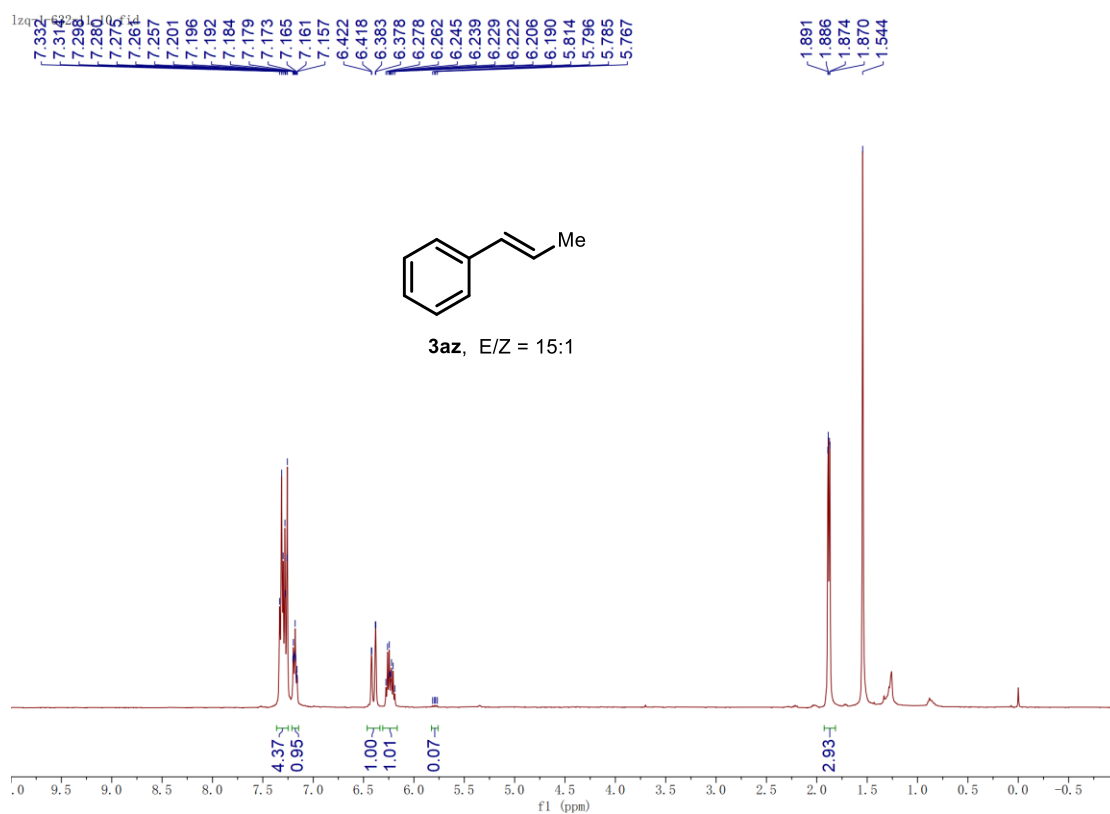

**Figure S116.**  $^1\text{H}$  NMR of **3az** (trans/cis mixture,  $\text{CDCl}_3$ , 400 MHz).

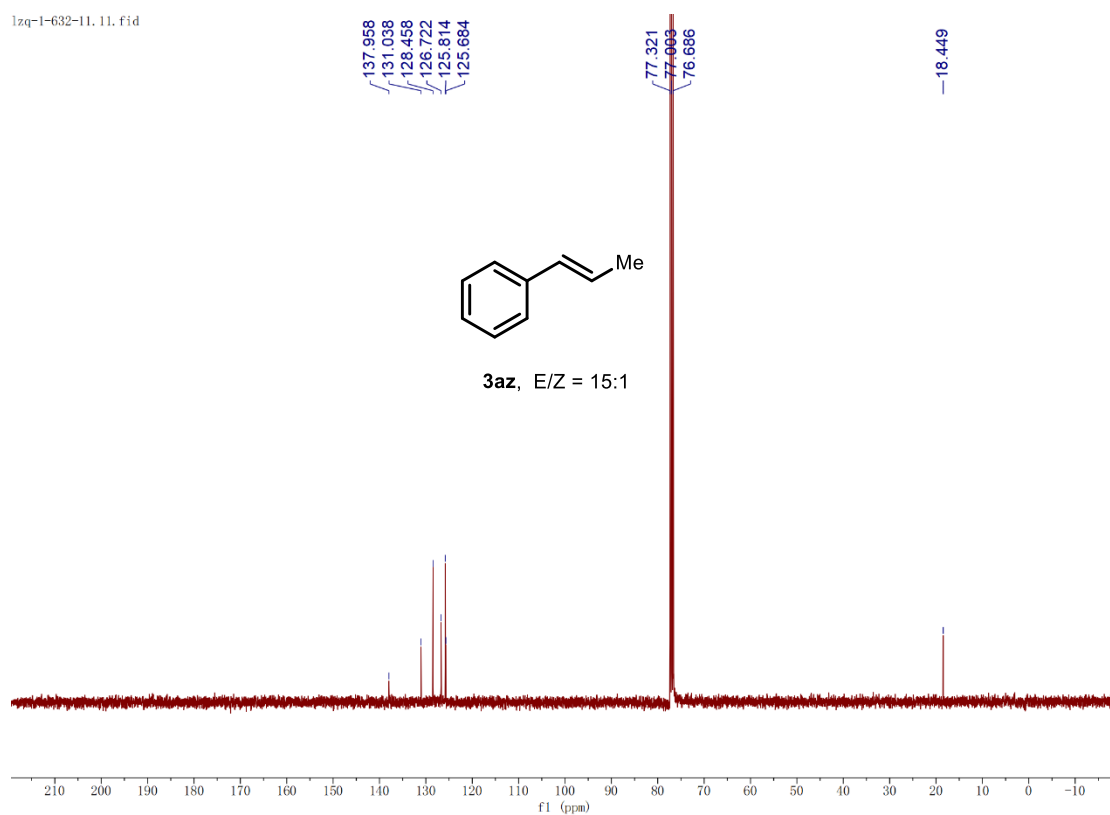

**Figure S117.**  $^{13}\text{C}$  NMR of **3az** (trans/cis mixture,  $\text{CDCl}_3$ , 101 MHz).
